# Supplementary material
Source: MDPI journal article supplement (https://www.mdpi.com/2311-5521/5/2/90)
Supplement: s1 [file s1]

0.50186	0.97343	1.5323	2.1563	2.6347	3.026	3.5193	4.1349	4.5416	4.8977	5.4093	5.9645	6.6233	7.2553	7.4622	8.1712	8.395	8.9239	9.8397	10.321	10.583	11.056	11.544	12.131	12.493	12.704	13.241	13.186	13.981	14.555	15.326
0.52079	1.0078	1.5277	2.0404	2.6347	3.0677	3.5498	4.1265	4.5863	4.9634	5.4392	5.9539	6.7605	7.1952	7.4499	8.0286	8.4884	8.9516	9.6196	10.169	10.505	11.33	11.643	12.148	12.441	12.598	13.222	13.423	13.849	14.342	15.487
0.49773	1.0078	1.5459	2.008	2.6411	2.9916	3.5574	4.1013	4.5595	4.9634	5.4994	5.9539	6.6347	7.1593	7.4868	7.9771	8.4216	9.1472	9.5615	10.078	10.505	11.233	11.626	12.165	12.424	12.774	13.15	13.478	13.831	14.574	15.265
0.48957	0.98365	1.4873	2.0296	2.5905	3.0191	3.4589	4.0846	4.5416	4.9728	5.5095	5.8591	6.6233	7.1354	7.5361	7.9003	8.4483	9.105	9.6196	10.229	10.459	11.282	11.593	12.2	12.581	12.845	13.132	13.552	13.849	14.574	15.285
0.48755	0.98024	1.5323	2.0134	2.5905	3.0468	3.5193	4.1013	4.5505	4.9917	5.5499	6.0498	6.6574	7.1952	7.3037	7.9771	8.3818	9.2319	9.4892	10.108	10.138	11.024	11.593	12.148	12.372	12.881	13.132	13.496	13.533	14.342	15.548
0.49979	1.0182	1.5277	2.1062	2.5905	3.0538	3.5345	4.0846	4.4795	4.9728	5.5195	5.9116	6.646	7.0878	7.5238	7.9515	8.5018	9.1331	9.547	10.093	10.505	10.96	11.494	12.234	12.528	12.828	13.295	13.607	13.793	13.981	15.225
0.48353	1.0182	1.5323	2.0188	2.6221	3.1168	3.5727	4.1181	4.5416	4.9728	5.5297	6.0071	6.6688	7.1593	7.4745	7.9515	8.4083	9.0072	9.5036	10.214	10.614	10.96	11.544	12.234	12.651	12.845	13.096	13.313	13.756	14.633	14.947
0.4658	0.95991	1.5689	2.1173	2.6284	3.0468	3.5345	4.1097	4.4972	4.8977	5.5297	6.0284	6.4656	7.1473	7.5114	7.6355	8.4884	9.0072	9.4748	10.154	10.536	10.897	11.527	12.114	12.633	12.935	13.096	13.35	13.719	14.73	15.085
0.49979	0.96328	1.5689	2.0296	2.578	3.0607	3.5345	4.093	4.5238	4.9352	5.5297	6.0498	6.4992	7.1712	7.5485	8.3818	8.475	8.9933	9.7073	10.093	10.459	10.817	11.478	12.251	12.528	12.704	13.078	13.552	13.478	14.535	15.125
0.47165	0.96666	1.5459	2.1062	2.7246	3.0191	3.5498	4.1685	4.4619	4.9258	5.56	5.9539	6.4879	7.1593	7.3644	8.1582	8.5286	9.091	9.6488	10.018	10.459	10.833	11.544	12.131	12.651	13.078	13.259	13.277	13.868	14.574	15.026
0.48153	1.0043	1.5368	2.0677	2.5905	3.0538	3.5117	4.177	4.5238	4.8883	5.5905	6.0498	6.4767	7.1473	7.4622	7.9515	8.5959	8.9933	9.6488	10.048	10.598	10.849	11.282	12.046	12.493	12.459	13.332	13.405	13.7	14.477	15.026
0.50186	0.99739	1.5232	2.0513	2.6157	3.0468	3.5345	4.1181	4.5863	4.879	5.5905	6.1142	6.4656	7.1473	7.4622	8.0157	8.5959	9.0211	9.7366	10.108	10.552	10.505	11.494	12.182	12.424	12.917	12.935	13.441	13.849	14.594	14.986
0.49364	0.9905	1.4917	2.1507	2.5034	3.0677	3.5041	4.1181	4.5863	4.879	5.5499	6.0391	6.4209	7.0286	7.4499	7.8367	8.7179	9.077	9.6342	10.063	10.629	10.802	11.577	11.826	12.511	12.704	13.06	13.277	13.868	14.477	15.205
0.49364	1.0008	1.5505	2.0951	2.6347	3.0468	3.5193	4.1349	4.5505	4.8977	5.4592	5.9964	6.5554	7.1116	7.4132	7.8748	8.7179	9.0351	9.6051	10.078	10.552	10.897	11.726	12.029	12.563	12.686	13.042	13.277	13.793	14.516	15.285
0.50601	1.0147	1.5414	2.0622	2.6031	3.0607	3.5269	4.177	4.5684	4.8883	5.56	5.9328	6.646	7.1593	7.5361	8.0932	8.5555	9.091	9.678	9.9734	10.505	10.897	11.461	12.08	12.739	12.757	13.096	13.496	13.962	14.419	14.711
0.49773	0.98365	1.5232	2.0622	2.6031	3.1027	3.5727	4.0763	4.5595	4.9164	5.4994	6.0177	6.578	7.0523	7.5733	8.2104	8.542	9.063	9.6488	10.018	10.521	11.056	11.676	12.148	12.669	12.774	13.06	13.478	13.887	14.574	15.145
0.49773	0.99394	1.5323	2.0296	2.5905	3.1027	3.5117	4.1601	4.5774	4.9634	5.4893	6.0712	6.6233	7.1235	7.5114	7.9643	8.5824	9.091	9.5615	10.154	10.505	10.944	11.577	11.944	12.581	12.792	13.168	13.644	13.737	14.555	15.285
0.50186	1.0043	1.5142	2.0513	2.6157	3.0677	3.5345	4.1181	4.5595	4.9445	5.5499	6.082	6.5667	7.1473	7.5485	8.0028	8.4083	8.9239	9.5905	10.275	10.459	10.976	11.494	11.961	12.616	12.899	13.168	13.663	13.737	14.691	15.265
0.50393	1.0113	1.5232	2.1006	2.6031	3.0122	3.5498	4.1685	4.5774	4.9445	5.4994	6.1466	6.646	7.0404	7.5361	7.9643	8.4216	8.7999	9.6634	10.244	10.474	10.992	11.726	12.08	12.581	12.828	13.204	13.552	13.812	14.633	15.326
0.50393	0.98707	1.5414	2.0242	2.6157	3.0538	3.4664	4.1349	4.5684	4.9823	5.5398	5.9964	6.6233	7.1473	7.4622	8.0028	8.5152	9.049	9.6051	10.199	10.583	11.088	11.626	12.046	12.598	12.881	13.114	13.644	13.774	14.672	15.548
0.49568	0.98024	1.5232	2.0622	2.6538	3.026	3.565	4.0597	4.5863	5.0487	5.5297	5.9858	6.6917	7.3158	7.5609	8.0028	8.475	9.0072	9.547	10.169	10.397	10.96	11.643	12.046	12.598	12.81	13.15	13.552	13.868	14.574	15.326
0.5102	0.97343	1.5187	2.0731	2.6031	3.0399	3.5574	4.1097	4.6313	5.1253	5.56	5.9645	6.7146	7.0286	7.4376	7.9387	8.4616	8.9933	9.5615	10.184	10.459	10.786	11.511	12.097	12.686	12.899	13.15	13.46	13.756	14.711	14.691
0.52079	0.98365	1.4651	2.1062	2.6221	3.2164	3.5117	4.0514	4.5061	5.1446	5.5297	6.0605	6.7146	7.0878	7.4499	7.9771	8.5555	8.9239	9.5905	10.229	10.382	11.04	11.511	11.995	12.563	12.881	13.241	13.57	13.887	14.633	15.066
0.51865	1.0078	1.5967	2.0404	2.5968	3.1592	3.4966	4.1013	4.6223	5.0678	5.5803	6.0498	6.7605	7.1473	7.4622	8.0028	8.542	9.1472	9.6051	10.229	10.567	10.992	11.544	12.131	12.546	12.97	13.259	13.46	13.812	14.613	14.947
0.49979	1.0358	1.4962	2.0404	2.5654	3.0468	3.5421	4.0846	4.5684	4.9917	5.5195	5.9964	6.6233	7.0641	7.4745	8.0932	8.4483	9.1754	9.5181	10.229	10.382	11.024	11.511	12.012	12.528	12.881	13.024	13.313	13.943	14.652	15.165
0.49568	1.0253	1.5643	2.0513	2.5968	3.033	3.5421	4.0763	4.6675	4.954	5.4292	6.1466	6.6233	7.1473	7.5238	8.1322	8.395	9.1331	9.5181	10.275	10.598	11.024	11.298	12.08	12.546	12.881	12.97	13.515	13.868	14.613	14.907
0.50186	1.0043	1.5368	2.0677	2.5467	2.971	3.5727	4.0846	4.6675	5.0297	5.5195	6.0071	6.6574	7.1235	7.4991	8.2366	8.2104	9.077	9.5905	10.26	10.661	10.96	11.577	12.097	12.424	12.757	12.97	13.607	13.831	14.594	15.185
0.49364	1.0043	1.5097	2.0841	2.6284	3.0607	3.565	4.1097	4.6675	4.954	5.5095	5.8906	6.646	7.1235	7.5361	8.1582	8.4616	9.049	9.547	10.229	10.661	10.928	11.544	11.995	12.389	12.757	12.881	13.15	13.831	14.672	15.165
0.50393	1.0043	1.5007	2.1062	2.553	3.1027	3.5269	4.1855	4.6494	4.9823	5.4392	6.0498	6.5667	7.1116	7.4868	8.1974	8.4884	9.063	9.5181	10.214	10.536	11.024	11.363	12.063	12.406	12.757	12.828	13.386	13.943	14.691	15.125
0.50601	0.99739	1.5323	2.035	2.5905	3.1027	3.5117	4.0597	4.5774	4.9728	5.5095	5.9858	6.646	7.1235	7.4499	8.1062	8.5018	9.063	9.547	10.229	10.459	10.992	11.56	12.029	12.459	12.721	12.669	13.46	13.962	14.574	15.205
0.49773	0.99739	1.5187	2.0731	2.578	3.0747	3.4814	4.1685	4.6947	4.9445	5.4592	6.1466	6.612	7.1235	7.4254	8.1062	8.4616	9.063	9.5615	10.184	10.629	10.96	11.61	11.944	12.406	12.774	13.259	13.552	13.793	14.594	15.145
0.48957	0.98365	1.5323	2.0896	2.5905	2.9985	3.5498	4.1433	4.6223	4.9445	5.4592	6.2009	6.5667	7.1116	7.3765	7.99	8.5152	9.0211	9.5615	10.123	10.49	10.833	11.743	11.911	12.389	12.988	12.952	13.405	13.868	14.419	15.165
0.48957	0.98024	1.5414	2.0622	2.5592	3.0607	3.5421	4.1601	4.6584	4.9445	5.5297	5.9964	6.612	7.1354	7.4254	7.9515	8.4616	8.9794	9.7513	10.078	10.521	11.088	11.676	11.894	12.493	12.792	13.15	13.496	13.981	14.362	15.085
0.48554	0.9905	1.5414	2.0786	2.4789	3.0468	3.5041	4.1855	4.6494	4.9634	5.4692	6.0284	6.5441	7.0997	7.4499	7.9259	8.542	9.1895	9.7366	10.093	10.505	10.96	11.693	11.978	12.355	12.881	12.988	13.423	13.943	14.497	15.026
0.47954	0.9905	1.5232	2.0188	2.5842	3.1309	3.5804	4.1433	4.6675	4.9917	5.4592	6.0284	6.5893	7.2312	7.4499	7.9387	8.5555	9.0351	9.678	10.048	10.521	11.008	11.544	12.046	12.389	12.881	13.168	13.496	13.663	14.535	15.066
0.47165	0.97343	1.5414	2.0951	2.6221	2.9301	3.6035	4.1097	4.6494	4.8232	5.5095	6.2009	6.612	7.2072	7.4132	8.0544	8.5689	8.9933	9.8102	10.093	10.567	11.056	11.593	12.08	12.441	12.917	13.024	13.552	13.793	14.497	15.046
0.48153	0.97004	1.5323	2.0404	2.6411	3.0468	3.6035	4.0846	4.6856	4.8977	5.5499	6.1035	6.646	7.1354	7.4499	7.9643	8.5959	9.0072	9.8693	10.108	10.598	11.056	11.412	12.063	12.424	12.633	13.06	13.368	13.849	14.439	15.066
0.47361	0.97343	1.5187	2.0567	2.6666	3.0191	3.5804	4.177	4.6856	4.8977	5.4893	6.1035	6.6233	6.9463	7.4132	8.0028	8.542	9.0211	9.7954	10.138	10.629	11.056	11.511	12.046	12.268	12.988	13.06	13.515	14	14.458	14.947
0.48353	0.97004	1.5232	2.0458	2.6157	3.0607	3.6035	4.1097	4.6947	4.879	5.4994	6.0498	6.612	7.0759	7.4254	7.9259	8.5286	9.0211	9.6196	10.123	10.707	11.12	11.61	12.08	12.389	12.863	13.078	13.478	14.094	14.516	15.026
0.5081	0.9532	1.5187	1.9919	2.5968	3.0468	3.6112	4.1601	4.713	4.9258	5.4692	6.0071	6.6347	7.1593	7.4499	7.7735	8.5959	9.1191	9.4748	10.123	10.629	11.04	11.478	12.097	12.372	12.881	13.096	13.405	14.094	14.594	15.165
0.47755	0.98707	1.4962	2.0951	2.5592	3.138	3.5957	4.1433	4.6765	4.907	5.4292	6.0498	6.7031	7.1952	7.5485	7.8494	8.4216	9.049	9.6051	10.033	10.629	11.072	11.626	12.046	12.268	12.651	12.988	13.57	13.943	14.672	15.105
0.48957	0.96328	1.5232	2.1062	2.6284	3.0468	3.5957	4.1855	4.6223	4.9917	5.6415	6.0498	6.578	7.2312	7.6729	7.8621	8.4483	9.2036	9.5325	10.138	10.707	11.056	11.61	12.165	12.217	12.739	13.078	13.496	13.887	14.828	15.285
0.47361	0.98365	1.5643	2.0026	2.5968	3.0538	3.5804	4.1685	4.6043	4.9445	5.6007	6.0498	6.6233	7.2192	7.698	7.9643	8.5555	8.9794	9.6196	10.154	10.645	10.928	11.643	12.097	12.2	12.704	13.132	13.533	13.793	14.828	15.205
0.47558	0.96328	1.5643	2.0188	2.5905	3.0887	3.5804	4.1685	4.6223	4.9634	5.6109	5.9751	6.578	7.0997	7.4499	7.8748	8.4616	8.9794	9.5325	10.154	10.692	11.056	11.494	12.131	12.285	12.669	13.078	13.737	13.737	14.887	15.165
0.48554	0.97343	1.5551	2.0242	2.6031	3.0607	3.5727	4.2109	4.6403	5.0012	5.6825	5.9645	6.7031	7.2312	7.5361	7.9771	8.6635	9.1191	9.5615	10.382	10.567	11.088	11.759	12.114	12.285	12.721	13.277	13.868	13.644	14.907	15.046
0.48353	0.96328	1.5643	2.0513	2.6157	3.0468	3.5498	4.1433	4.6494	4.9352	5.5702	5.9645	6.7146	7.2312	7.5609	8.0803	8.5555	9.0351	9.547	10.214	10.521	10.992	11.544	12.046	12.337	12.651	13.168	13.46	13.681	14.711	15.006
0.47755	0.96666	1.5643	1.9706	2.5842	3.0607	3.6112	4.1265	4.6223	4.9445	5.5499	5.9858	6.646	7.2072	7.4991	8.1322	8.4884	8.9655	9.576	10.093	10.443	11.104	11.544	12.2	12.406	12.774	13.222	13.332	13.533	14.73	15.066
0.48755	0.9532	1.5781	2.0677	2.5717	3.0957	3.5881	4.1349	4.6133	4.954	5.5398	5.9964	6.6006	7.2674	7.4622	8.1582	8.6635	9.0072	9.5181	10.108	10.692	10.96	11.626	12.114	12.511	12.792	13.06	13.368	13.626	14.73	15.026
0.48755	0.97683	1.5414	2.0677	2.5467	2.9916	3.5041	4.1265	4.6133	4.9445	5.5499	6.0177	6.6574	7.2433	7.5114	8.1582	8.5018	9.049	9.446	10.214	10.443	10.912	11.56	12.114	12.459	12.704	13.15	13.313	13.57	14.477	15.066
0.46969	0.97004	1.5459	2.0404	2.5905	3.0607	3.489	4.1097	4.5238	5.0107	5.4994	6.0284	6.6917	7.2433	7.4868	8.1192	8.5286	8.8824	9.3742	10.108	10.692	11.088	11.776	11.978	12.424	12.686	13.15	13.313	13.7	14.381	14.986
0.46195	0.96328	1.5459	2.0188	2.5717	3.0399	3.4814	4.1013	4.5774	5.0582	5.56	5.9751	6.6574	7.2553	7.4376	8.0544	8.5286	8.9516	9.5325	10.093	10.552	11.088	11.626	12.08	12.389	12.2	13.114	13.496	13.756	14.613	15.066
0.47361	0.95656	1.5368	2.1173	2.5654	3.033	3.489	4.0846	4.6133	4.9445	5.5702	5.9433	6.6233	7.3522	7.4376	8.0673	8.4083	9.0211	9.5181	10.123	10.552	11.088	11.659	12.08	12.459	12.616	13.096	13.478	13.831	14.633	14.868
0.47755	0.97343	1.5414	2.0841	2.5654	3.1168	3.5345	4.093	4.5595	4.879	5.5803	5.9645	6.6233	7.3279	7.4254	8.0673	8.5286	9.063	9.8102	10.214	10.614	11.104	11.577	12.148	12.476	12.686	13.024	13.441	13.589	14.711	15.066
0.4916	0.98024	1.5459	2.1006	2.578	3.0817	3.4739	4.068	4.5953	4.9352	5.5499	6.082	6.6233	7.2795	7.3765	8.1062	8.3818	9.2036	9.4604	10.154	10.567	11.072	11.61	12.251	12.493	12.669	13.006	13.607	13.719	14.691	15.145
0.48957	0.98024	1.5735	1.9866	2.5654	3.0607	3.5345	4.1433	4.6223	4.907	5.5702	6.125	6.578	7.1952	7.4376	8.0673	8.4216	9.0351	9.5905	10.093	10.598	11.088	11.676	12.285	12.669	12.739	13.042	13.57	13.793	14.613	14.947
0.48957	0.97683	1.5828	2.1284	2.6475	3.1027	3.5041	4.1265	4.6133	5.0012	5.5195	6.1035	6.6233	6.9933	7.3765	8.0673	8.4483	9.2177	9.678	10.214	10.536	11.008	11.676	12.251	12.774	12.881	13.078	13.552	13.868	14.633	14.947
0.47361	0.97343	1.5735	2.0567	2.5905	3.145	3.5727	4.1013	4.4707	5.0107	5.6109	6.1358	6.612	7.1354	7.4376	8.0803	8.4216	9.1331	9.6488	9.9883	10.428	11.008	11.726	12.182	12.651	12.845	13.078	13.441	13.962	14.633	14.887
0.48554	0.99394	1.5368	2.1173	2.6031	3.033	3.5193	4.0763	4.5061	5.0012	5.5095	6.0605	6.6688	7.1473	7.4745	8.2498	8.435	9.091	9.7366	10.229	10.49	10.976	11.643	12.217	12.97	12.757	13.132	13.533	14.113	14.574	15.026
0.4916	0.97004	1.4962	2.0786	2.5968	3.0607	3.5193	4.068	4.7771	4.954	5.5095	6.0284	6.7605	7.2072	7.4499	8.0932	8.4884	9.2744	9.6634	10.078	10.49	10.992	11.577	12.165	12.355	12.881	13.042	13.533	14	14.633	15.145
0.49364	0.96666	1.4962	2.134	2.6347	3.0538	3.4589	4.0846	4.6133	5.0202	5.4793	6.082	6.6347	7.2433	7.4991	8.1452	8.475	9.0211	9.766	10.123	10.536	10.833	11.776	12.08	12.063	12.935	13.168	13.515	14.037	14.711	15.165
0.4916	0.99394	1.4651	2.1228	2.6157	3.0747	3.4513	4.0846	4.6223	5.0487	5.5499	6.0391	6.6688	7.2915	7.4622	8.0932	8.435	9.2461	9.678	10.367	10.351	11.104	11.577	12.131	12.528	12.739	13.114	13.405	14.037	14.652	15.265
0.49773	0.96328	1.4962	1.9866	2.6031	3.0677	3.5269	4.1181	4.6223	5.0678	5.5195	6.0498	6.7031	7.1593	7.4376	8.0932	8.3818	9.2744	9.7366	10.214	10.413	11.185	11.61	12.08	12.251	12.757	13.15	13.368	13.962	14.75	15.165
0.47954	0.93656	1.5007	2.0896	2.6347	3.0399	3.5727	4.093	4.6133	4.954	5.5195	6.0177	6.6006	7.2553	7.5114	8.0286	8.395	9.1613	9.6196	10.123	10.49	11.12	11.577	12.063	12.459	12.739	12.828	13.626	13.906	14.691	15.105
0.5123	0.95656	1.4917	2.0134	2.5968	3.0468	3.565	4.1517	4.5863	4.9728	5.4692	6.0712	6.6347	7.2915	7.4745	8.0544	8.435	9.049	9.7807	10.244	10.428	11.072	11.511	12.097	12.563	12.774	12.917	13.496	14.019	14.809	14.907
0.49773	1.0113	1.5689	2.1006	2.6094	2.9985	3.6189	4.068	4.5595	4.9728	5.4292	6.1035	6.5216	7.34	7.4499	8.0415	8.6635	9.2036	9.6634	10.29	10.367	11.185	11.461	11.995	12.546	12.721	13.186	13.57	13.924	14.711	14.986
0.50186	0.96666	1.5187	2.0404	2.5905	3.0538	3.5804	4.0846	4.6223	4.907	5.5095	6.125	6.4432	7.1593	7.4254	8.0544	8.6364	8.9516	9.6488	10.154	10.367	11.104	11.478	11.978	12.251	12.81	12.899	13.496	13.868	14.691	15.285
0.45812	1.0113	1.5232	2.008	2.6475	3.0399	3.5574	4.0514	4.5505	5.0392	5.4793	6.082	7.0641	7.1712	7.4132	8.0932	8.5152	9.1191	9.8397	10.184	10.336	11.12	11.445	12.097	12.476	12.863	12.97	13.533	14.037	14.613	15.225
0.46969	1.0008	1.5142	2.0841	2.6157	3.0677	3.5421	4.0763	4.6313	4.9352	5.4692	5.9328	6.5893	7.2553	7.4622	8.1452	8.6229	8.8274	9.6342	10.018	10.49	11.12	11.461	11.995	12.633	12.792	13.042	13.478	13.981	14.477	15.026
0.4658	0.98365	1.5232	1.96	2.6157	2.9985	3.5498	4.1517	4.5595	5.0965	5.4793	5.9222	6.4992	7.3279	7.4868	8.2366	8.5152	8.9933	9.6342	10.199	10.459	11.056	11.347	12.165	12.81	12.917	13.078	13.7	13.849	14.477	15.026
0.47755	0.98365	1.5097	2.0404	2.553	3.0817	3.5804	4.1349	4.6133	4.9917	5.5095	5.9433	6.6574	7.34	7.4991	8.1712	8.5824	9.1895	9.6342	10.184	10.474	10.992	11.363	12.029	12.32	12.828	13.078	13.589	13.887	14.497	15.046
0.49773	0.98707	1.4828	2.1062	2.553	3.0538	3.5421	4.1601	4.5595	4.9823	5.6109	5.9116	6.5104	7.2433	7.4745	8.1974	8.5555	9.0351	9.7366	10.229	10.351	11.04	11.185	11.911	12.303	12.952	13.15	13.737	13.906	14.594	15.165
0.45432	0.99394	1.5052	2.0731	2.6094	3.0817	3.5574	4.1181	4.5953	4.9445	5.4994	5.9222	6.578	7.2433	7.4132	8.0286	8.6094	8.9794	9.9138	10.397	10.382	11.072	11.412	11.843	12.616	12.774	13.006	13.774	13.774	14.477	15.165
0.47165	1.0043	1.4917	2.0841	2.6284	3.0538	3.5421	4.1349	4.6223	4.9634	5.5803	5.9222	6.6233	7.2072	7.3765	8.0544	8.5286	9.063	9.7513	10.26	10.443	10.928	11.511	12.08	12.528	12.917	13.042	13.793	13.7	14.711	15.046
0.51865	1.0008	1.5232	2.0896	2.5968	3.0747	3.6035	4.1349	4.6584	5.0107	5.5297	5.9116	6.612	7.2915	7.3644	8.1062	8.6907	9.049	9.5905	10.199	10.382	10.723	11.461	11.944	12.757	12.828	12.988	13.7	13.626	14.75	15.066
0.48755	0.99394	1.5232	2.0786	2.6411	3.0191	3.5193	4.1433	4.6584	5.0107	5.4592	5.9964	6.6574	7.2674	7.3644	8.0673	8.3685	8.8687	9.6051	10.199	10.367	11.056	11.494	11.927	12.476	12.881	12.97	13.644	13.793	14.927	15.066
0.4916	0.99394	1.5277	2.0622	2.5968	3.0538	3.5804	4.1349	4.6043	4.954	5.5297	5.9433	6.646	7.2072	7.4868	8.0286	8.4616	9.0211	9.678	10.275	10.583	11.072	11.577	11.877	12.757	12.917	13.006	13.478	13.793	14.789	15.006
0.47361	0.9905	1.5232	2.0786	2.5842	3.0399	3.6035	3.9772	4.5863	5.0107	5.5095	5.9751	6.726	7.2553	7.3887	7.9515	8.542	8.9655	9.6488	10.26	10.536	10.992	11.445	11.911	12.424	12.757	12.935	13.626	13.981	14.535	14.907
0.5102	1.0288	1.5142	2.0622	2.578	3.0191	3.5881	4.1265	4.5774	4.954	5.4392	5.8696	6.578	7.2795	7.4254	7.8367	8.6771	9.0072	9.6634	10.244	10.505	10.976	11.494	11.944	12.493	12.598	12.952	13.681	14.019	14.516	15.066
0.48353	0.98707	1.5232	2.0677	2.5842	3.0191	3.4139	4.1349	4.6133	5.0297	5.4793	5.9964	6.6574	7.1354	7.4499	8.0028	8.542	9.063	9.4316	10.244	10.428	11.008	11.709	11.894	12.528	12.704	13.006	13.607	14.056	14.323	14.868
0.49979	1.0113	1.5277	2.0896	2.5968	3.0957	3.6035	4.1517	4.6403	4.9917	5.6007	6.0071	6.612	7.0759	7.3158	8.0286	8.5555	9.0211	9.7807	10.321	10.397	10.865	11.577	11.944	12.424	12.721	12.917	13.478	14.037	14.652	15.006
0.49773	0.98707	1.5232	2.1284	2.6284	3.0122	3.5727	4.0763	4.6223	4.9728	5.5095	5.8381	6.7835	7.2433	7.3887	8.0415	8.65	9.0351	9.6634	10.275	10.428	10.928	11.544	11.944	12.528	12.774	13.132	13.478	13.868	14.516	15.006
0.49773	0.99739	1.5277	2.008	2.6347	3.0122	3.4739	4.2024	4.6043	4.9634	5.5398	5.9116	6.5554	7.1593	7.3887	8.0932	8.542	9.0211	9.6342	10.123	10.459	10.928	11.577	12.165	12.493	12.899	13.078	13.552	14.019	14.613	14.966
0.48153	0.99394	1.5052	1.9389	2.5343	3.0122	3.5193	4.2279	4.6494	4.9728	5.5499	5.9011	6.6233	7.1116	7.4254	7.9131	8.5555	9.063	9.6634	10.244	10.443	11.008	11.478	11.877	12.493	12.828	13.06	13.496	14.056	14.362	15.145
0.48554	1.0078	1.5097	2.0841	2.5717	2.9985	3.5498	4.2024	4.5595	4.954	5.4692	5.88	6.6233	7.1354	7.4376	7.9387	8.6364	8.9377	9.6342	10.244	10.428	10.992	11.314	12.114	12.546	12.899	12.97	13.57	13.981	14.497	15.285
0.49568	0.95656	1.5551	2.0951	2.553	3.0468	3.5804	4.0514	4.5953	5.0107	5.5095	5.9964	6.6688	7.3158	7.4991	7.9643	8.5152	9.0351	9.6634	10.26	10.459	11.04	11.412	12.2	12.581	12.757	13.078	13.46	13.943	14.594	15.366
0.49364	0.98365	1.5414	2.035	2.578	3.0747	3.5345	4.1181	4.5774	5.0012	5.6211	6.0284	6.5554	7.2192	7.4868	8.0028	8.6094	8.9516	9.6488	10.184	10.505	10.833	11.494	11.961	12.563	12.917	13.222	13.423	14.037	14.73	15.386
0.4916	0.99394	1.5459	2.0622	2.6094	3.0887	3.5574	4.1265	4.6133	4.879	5.5702	5.88	6.5893	7.1952	7.3522	8.0803	8.5018	9.0211	9.6196	10.305	10.305	10.817	11.428	12.2	12.651	12.952	13.222	13.423	13.906	14.986	15.245
0.50393	0.9905	1.5967	2.0841	2.5842	3.0191	3.5421	4.1939	4.6223	5.0773	5.5297	6.0605	6.6574	7.2312	7.5238	8.0157	8.395	8.9516	9.6196	10.138	10.397	10.881	11.33	12.046	12.528	13.006	13.15	13.405	14.113	14.516	15.145
0.49773	0.9905	1.5368	2.035	2.578	3.1309	3.4966	4.0431	4.5595	4.8977	5.5095	5.9751	6.5104	7.1832	7.4132	8.1452	8.5555	8.8824	9.6488	10.214	10.739	10.786	11.363	11.927	12.511	12.845	13.096	13.46	13.868	14.652	15.205
0.5102	0.98707	1.5781	2.0622	2.5968	3.0677	3.5498	4.1685	4.6043	4.9352	5.4492	5.9751	6.612	7.1593	7.4376	8.1322	8.435	9.0072	9.6051	10.199	10.49	11.008	11.428	12.012	12.424	12.721	13.042	13.46	14.019	14.594	14.947
0.49568	0.98365	1.5597	2.1845	2.6094	3.1734	3.5421	4.177	4.6403	5.0107	5.4492	6.0071	6.4656	7.1354	7.4745	8.0544	8.5018	9.063	9.547	10.214	10.505	10.897	11.445	12.063	12.389	12.845	13.132	13.533	14.132	14.555	15.285
0.47361	0.9905	1.4256	2.035	2.553	3.1877	3.5574	4.1013	4.6403	4.8697	5.4592	5.9751	6.578	7.1354	7.4745	8.0286	8.5286	8.9794	9.6342	10.093	10.645	10.865	11.33	12.234	12.337	12.917	13.096	13.368	13.831	14.381	15.046
0.51653	1.0182	1.5414	2.0567	2.5219	3.1168	3.6035	4.1181	4.6584	4.9164	5.4793	5.9116	6.7146	7.1832	7.6105	8.0544	8.6364	9.1331	9.7513	10.199	10.459	10.928	11.478	12.012	12.303	12.863	13.114	13.478	13.849	14.323	15.105
0.48957	0.99739	1.5643	2.0567	2.5467	3.0677	3.5421	4.1433	4.5327	4.9728	5.5095	5.9116	6.5893	7.1593	7.4132	8.0157	8.6229	8.9794	9.446	10.275	10.598	10.944	11.494	12.029	12.528	12.881	13.295	13.405	13.831	14.4	15.165
0.49979	0.99394	1.5323	2.035	2.5717	3.0957	3.5269	4.093	4.4355	4.879	5.4994	5.9751	6.646	7.2312	7.4254	8.0544	8.6229	8.9655	9.7073	10.26	10.692	11.008	11.461	12.097	12.406	12.669	13.114	13.515	13.924	14.574	15.265
0.49773	0.99394	1.5368	2.0677	2.6157	3.0747	3.5957	4.1265	4.6313	4.9634	5.5095	6.0927	6.6688	7.2553	7.2915	7.9643	8.5824	9.1191	9.5615	10.184	10.629	11.072	11.544	12.029	12.528	12.828	13.024	13.46	13.906	14.652	15.105
0.48755	0.97683	1.5921	2.0841	2.5654	3.0607	3.5574	4.1855	4.6675	5.0012	5.5499	6.082	6.3987	7.3037	7.3765	7.9515	8.5824	9.091	9.547	10.244	10.552	11.056	11.511	11.894	12.563	12.828	13.042	13.423	13.906	14.594	15.185
0.49364	1.0147	1.5597	2.0513	2.5842	3.0957	3.5345	4.1181	4.6675	5.0202	5.5297	6.0498	6.578	7.2072	7.4991	7.9003	8.5555	9.077	9.4316	10.093	10.474	11.072	11.56	11.978	12.581	12.828	13.168	13.35	13.793	14.555	15.125
0.4916	0.99739	1.5921	2.1062	2.5467	3.026	3.5345	4.1097	4.5595	4.9445	5.6007	6.1358	6.6233	7.4376	7.4376	7.99	8.5286	9.1191	9.5181	10.154	10.583	11.136	11.511	12.063	12.493	12.704	13.332	13.496	13.644	14.516	15.105
0.49364	0.99394	1.5187	2.1284	2.6411	3.0399	3.4513	4.1097	4.5863	4.9634	5.6517	6.0071	6.5441	7.1712	7.3765	7.9771	8.435	9.0211	9.576	10.29	10.521	11.056	11.577	11.944	12.355	12.739	13.096	13.368	13.906	14.419	15.046
0.50186	1.0182	1.5414	2.0242	2.6221	3.0538	3.5727	4.1855	4.5863	4.9634	5.5905	5.8696	6.6006	7.1354	7.4254	8.0028	8.542	9.049	9.7073	10.184	10.567	11.072	11.759	11.911	12.459	12.721	13.186	13.35	13.981	14.535	15.225
0.5102	0.98365	1.5597	2.0677	2.5405	3.033	3.5498	4.1013	4.6133	5.0012	5.5702	5.8486	6.5216	7.0404	7.5981	8.0544	8.6635	9.049	9.5615	10.123	10.552	10.96	11.743	11.995	12.563	12.845	13.06	13.441	13.906	14.439	15.165
0.48353	0.98365	1.5368	2.0731	2.5717	3.026	3.5345	4.1349	4.6133	4.9728	5.6007	6.0177	6.4321	7.1593	7.4622	8.0415	8.5152	9.063	9.6488	10.063	10.443	11.217	11.776	11.995	12.721	12.598	12.97	13.386	13.774	14.574	15.306
0.52079	0.96328	1.5323	2.0622	2.578	2.971	3.5727	4.093	4.5953	4.9258	5.4994	6.0605	6.5329	7.1952	7.2433	8.0028	8.6771	8.9794	9.678	9.9883	10.598	11.152	11.793	12.114	12.546	12.686	13.078	13.313	14.132	14.535	14.809
0.48554	0.98707	1.5187	2.0951	2.6221	2.9642	3.5193	4.1181	4.6403	4.9352	5.4793	6.0498	6.5104	7.3887	7.4009	8.0028	8.5689	8.9377	9.547	10.138	10.49	11.008	11.593	11.995	12.546	12.739	13.15	13.515	13.793	14.691	14.907
0.45812	1.0043	1.5368	2.0622	2.5592	3.026	3.4814	4.2194	4.5863	4.9164	5.5499	6.0071	6.3655	7.1952	7.4376	8.0157	8.5152	8.8687	9.547	10.048	10.443	10.912	11.693	12.165	12.511	12.845	13.042	13.441	13.868	14.711	15.125
0.49568	1.0217	1.5505	2.0513	2.5905	3.0399	3.4814	4.1181	4.5953	4.8697	5.5702	5.9858	6.4992	7.1116	7.4009	7.8748	8.4616	8.7999	9.5181	10.138	10.49	10.817	11.56	12.355	12.424	12.935	13.114	13.46	13.774	14.477	15.125
0.49773	0.98024	1.5414	2.0841	2.5905	3.0122	3.5117	4.1433	4.5684	4.8325	5.5499	5.9751	6.3987	7.1593	7.4376	8.0028	8.4216	8.8274	9.5905	10.063	10.428	11.217	11.593	11.944	12.511	12.97	13.186	13.496	13.849	14.4	15.366
0.50601	0.99394	1.6014	2.0951	2.6094	2.9916	3.5269	4.2194	4.6403	4.814	5.4492	6.0391	6.5104	7.1473	7.4132	7.9515	8.4216	9.063	9.6634	10.108	10.521	10.802	11.659	12.012	12.563	12.863	13.06	13.332	13.812	14.652	15.265
0.50601	0.99394	1.5505	2.0622	2.5592	3.0468	3.5117	4.093	4.6043	4.8511	5.4492	5.9751	6.4656	7.1593	7.4254	7.8748	8.4884	8.9933	9.6196	10.123	10.428	10.96	11.759	12.131	12.546	12.774	13.042	13.924	13.849	14.613	15.366
0.49364	0.9905	1.5052	2.0896	2.6094	3.0817	3.5421	4.1685	4.6765	4.9634	5.4793	5.9858	6.4656	7.2192	7.4622	7.8748	8.5018	9.063	9.5325	10.169	10.382	11.072	11.676	12.063	12.476	12.952	13.259	13.405	13.943	14.574	15.145
0.50186	0.98024	1.5643	2.0622	2.6157	3.0399	3.4966	4.1349	4.6133	5.0107	5.5095	6.0284	6.6006	7.1473	7.4009	8.0157	8.475	9.1895	9.5615	10.214	10.382	11.282	11.726	12.012	12.424	12.757	13.222	13.386	13.849	14.555	15.346
0.4916	0.98024	1.5505	2.0841	2.6157	3.026	3.5117	4.1601	4.6313	4.8977	5.5398	5.9858	6.6233	7.34	7.4009	7.99	8.5689	8.9655	9.6634	10.321	10.505	11.104	11.643	12.097	12.528	12.828	13.222	13.222	13.756	14.652	15.066
0.50601	0.96328	1.5323	2.0731	2.5842	3.0747	3.4814	4.2109	4.5774	5.0297	5.5702	5.9751	6.6233	7.1952	7.5485	7.9259	8.5824	9.0072	9.6342	10.367	10.443	11.12	11.511	12.114	12.511	12.739	13.15	13.277	13.849	14.458	15.085
0.48957	0.99394	1.5368	2.0896	2.5717	3.0399	3.4739	4.2109	4.5238	4.9917	5.56	5.9858	6.612	7.2674	7.5114	7.8621	8.6094	8.9655	9.766	10.351	10.459	11.056	11.776	12.148	12.372	12.739	13.042	13.441	13.681	14.497	15.427
0.49568	0.96666	1.5414	2.1173	2.6284	3.0468	3.5269	4.093	4.5684	5.0392	5.5905	5.7444	6.578	7.2674	7.5609	7.99	8.6094	8.9516	9.6926	10.199	10.397	10.992	11.544	12.114	12.528	12.845	13.168	13.405	14.132	14.574	15.245
0.4916	1.0008	1.5551	2.0622	2.5842	3.0887	3.489	4.1517	4.6584	5.0107	5.6109	5.9964	6.4992	7.3279	7.5733	7.9643	8.6771	8.8963	9.6051	10.138	10.552	10.944	11.593	12.114	12.511	12.686	13.114	13.35	13.943	14.574	15.205
0.49979	1.0078	1.5142	2.0458	2.5968	3.1097	3.489	4.093	4.6223	5.0297	5.5499	5.9751	6.5329	7.2312	7.5609	8.0286	8.7043	8.9516	9.5615	10.169	10.367	11.056	11.643	12.251	12.355	13.132	13.042	13.423	14.019	14.633	15.105
0.4916	1.0043	1.5368	2.0404	2.6221	3.0887	3.5041	4.1013	4.5953	5.0297	5.5803	5.9858	6.4879	7.2192	7.5485	8.1062	8.7725	8.7999	9.5905	10.275	10.26	11.201	11.445	12.2	12.285	12.828	12.97	13.35	13.831	14.516	15.006
0.49773	1.0253	1.5142	2.0404	2.5654	2.9985	3.5117	4.1601	4.6313	4.9728	5.5195	6.0071	6.5216	7.2553	7.5114	8.0157	8.6094	8.7589	9.7219	10.29	10.629	11.056	11.494	12.165	12.459	13.078	12.952	13.423	14.019	14.691	15.205
0.50186	1.0043	1.5232	2.0622	2.5968	3.0538	3.5193	4.1433	4.6223	4.9917	5.4893	6.0071	6.4209	7.2915	7.4254	7.99	8.475	8.9101	9.5036	10.367	10.552	10.976	11.544	12.131	12.493	12.81	12.881	13.332	14.056	14.613	15.245
0.51865	0.99739	1.5459	2.0242	2.5592	3.033	3.4513	4.1517	4.6223	4.954	5.4492	5.9858	6.4544	7.2915	7.4622	7.9003	8.5286	8.9516	9.6926	10.26	10.49	11.201	11.379	12.114	12.459	13.132	13.096	13.441	13.887	14.652	15.066
0.50186	1.0008	1.4917	2.0296	2.6347	3.026	3.5193	4.1517	4.6313	4.9258	5.56	5.9433	6.5893	7.3522	7.4991	7.9515	8.542	9.0211	9.6342	10.29	10.351	11.168	11.445	12.182	12.511	12.828	13.024	13.441	14.075	14.809	15.125
0.5081	1.0147	1.5735	2.0188	2.6031	2.9642	3.5117	4.1013	4.6133	4.8883	5.4994	6.0391	6.4656	7.2312	7.4745	7.9643	8.542	8.9933	9.6051	10.305	10.474	11.185	11.527	11.995	12.563	13.096	12.988	13.313	14.019	14.868	15.105
0.50186	1.0043	1.5323	2.0458	2.6284	3.0817	3.4664	4.2109	4.6856	4.9445	5.4893	5.9751	6.4098	7.2312	7.4376	8.0028	8.5152	8.9101	9.5905	10.351	10.536	11.152	11.626	11.911	12.493	12.899	12.988	13.515	14.056	14.769	15.046
0.48353	1.0043	1.5414	2.0567	2.578	3.1027	3.5041	4.1939	4.6313	5.0297	5.4893	5.9858	6.4544	7.3037	7.3522	7.9515	8.5689	8.9101	9.7366	10.214	10.443	11.12	11.544	11.995	12.424	12.774	13.15	13.533	13.812	14.691	15.185
0.48153	1.0113	1.5187	2.0622	2.6284	3.0122	3.4664	4.2024	4.6584	5.0678	5.5499	5.88	6.5329	7.2192	7.3887	7.9515	8.5555	8.9933	9.7073	10.138	10.583	11.008	11.494	11.978	12.355	12.899	13.204	13.589	13.868	14.711	15.185
0.48153	1.0008	1.5414	2.0731	2.5905	3.0399	3.5345	4.0763	4.6313	5.0392	5.4893	5.9222	6.5554	7.1593	7.4745	8.0157	8.5018	8.9239	9.7807	9.9585	10.428	10.992	11.544	12.063	12.686	12.845	13.06	13.295	14.094	14.458	15.125
0.47755	1.0008	1.5232	2.0731	2.5842	3.026	3.565	4.0846	4.5061	5.0582	5.5095	5.9751	6.4656	7.1235	7.5485	8.0544	8.542	8.9516	9.766	9.9138	10.443	10.96	11.494	11.927	12.616	12.899	13.186	13.7	13.849	14.458	15.165
0.47755	0.99739	1.5414	2.035	2.5842	2.9642	3.4589	4.0431	4.6494	4.954	5.3596	6.0712	6.4656	7.0759	7.5238	8.1712	8.5286	8.8824	9.6051	10.063	10.49	10.865	11.379	12.063	12.581	12.774	13.168	13.719	13.868	14.497	15.326
0.48554	0.9905	1.5505	2.0242	2.5717	3.0677	3.5345	4.1265	4.6223	5.0012	5.4893	5.9011	6.5216	7.2795	7.5238	8.1062	8.5959	8.9101	9.4316	10.123	10.474	11.168	11.445	12.029	12.476	13.006	12.952	13.405	13.812	14.633	15.346
0.47755	0.98707	1.5007	2.0841	2.5905	3.0468	3.5345	4.093	4.6765	5.0107	5.4793	6.0712	6.4656	7.1116	7.5609	7.9771	8.6229	8.7862	9.4172	10.063	10.382	10.96	11.478	12.08	12.721	12.917	13.06	13.663	13.906	14.652	15.185
0.48353	0.98707	1.5597	2.1062	2.5343	3.0468	3.5421	4.1013	4.6584	4.9823	5.4292	5.9858	6.4879	7.2433	7.4868	8.0028	8.5152	8.9794	9.4892	10.154	10.336	10.817	11.461	11.927	12.285	12.881	13.204	13.441	13.812	14.672	15.306
0.47755	0.95991	1.4962	2.0786	2.6411	3.0122	3.5345	4.1097	4.5595	4.954	5.4592	6.0177	6.4992	7.1354	7.4622	8.0803	8.5689	8.9377	9.5181	10.078	10.367	11.233	11.61	12.029	12.616	12.881	13.15	13.423	13.943	14.633	15.105
0.48755	0.9432	1.5414	2.1117	2.6157	3.0399	3.5041	4.1433	4.6133	4.9917	5.4392	6.0177	6.578	7.1473	7.4745	7.9643	8.4884	9.105	9.5325	10.108	10.552	10.928	11.527	11.978	12.234	12.828	13.006	13.313	13.849	14.672	15.105
0.48353	0.96328	1.5323	2.1006	2.6411	3.0677	3.5193	4.177	4.5684	4.9634	5.3695	6.082	6.612	7.1832	7.4376	8.0028	8.4884	8.9933	9.5325	10.078	10.536	11.072	11.743	12.029	12.285	12.97	13.114	13.644	14.037	14.633	15.245
0.47954	0.98024	1.5597	2.1006	2.6157	3.033	3.4589	4.1855	4.5863	5.0869	5.4592	5.9858	6.6574	7.1593	7.4254	7.9771	8.4216	8.8824	9.5905	10.184	10.428	11.088	11.428	11.944	12.337	12.774	13.114	13.719	14.037	14.574	15.225
0.49773	0.98365	1.5551	2.1006	2.5467	3.0538	3.4139	4.1685	4.5595	4.9917	5.4192	6.0177	6.6233	7.2312	7.4009	7.9771	8.5824	8.8824	9.5905	10.138	10.428	11.072	11.478	11.927	12.285	12.881	13.168	13.663	13.981	14.574	15.205
0.48957	0.98707	1.5643	2.1006	2.578	3.0399	3.4664	4.1855	4.5327	4.9728	5.5499	6.0391	6.5104	7.1712	7.4991	8.0803	8.542	8.9239	9.6926	10.154	10.505	11.008	11.298	12.114	12.337	13.06	13.06	13.7	14.075	14.458	15.225
0.49568	0.98707	1.5505	2.1395	2.5592	3.0468	3.4589	4.1433	4.4795	5.0012	5.5297	5.9858	6.578	7.1235	7.5361	8.1062	8.4083	9.105	9.7073	10.078	10.382	10.912	11.726	12.268	12.337	12.739	13.06	13.607	14.037	14.516	15.145
0.49364	0.99739	1.5232	2.1062	2.6031	3.026	3.5345	4.1349	4.5863	5.0012	5.5095	5.9858	6.5667	7.0878	7.5485	8.1843	8.5152	9.1472	9.6051	9.9883	10.413	11.056	11.593	12.234	12.372	12.774	13.024	13.496	14.094	14.477	15.145
0.48957	0.99739	1.5874	2.1062	2.6538	3.026	3.5117	4.1097	4.5774	5.0107	5.4592	6.0284	6.5893	7.1593	7.4132	8.1452	8.4216	9.049	9.6196	9.8693	10.367	10.976	11.593	12.32	12.337	12.97	13.132	13.533	14.17	14.439	15.185
0.48957	1.0394	1.4873	2.1006	2.6157	3.0607	3.4739	4.1433	4.5238	4.9728	5.5905	6.0391	6.646	7.1473	7.4254	8.2235	8.5555	8.9239	9.7954	10.138	10.428	10.897	11.527	12.234	12.285	13.15	13.024	13.259	14.304	14.458	15.105
0.47954	1.0608	1.5097	2.1117	2.6221	3.0677	3.6189	4.1265	4.5061	4.9823	5.4592	6.0391	6.5329	7.0523	7.2674	8.1974	8.5018	9.091	9.8397	10.123	10.474	10.96	11.643	12.285	12.459	13.042	13.06	13.332	14.266	14.381	14.868
0.49773	1.0288	1.5187	2.1173	2.6094	3.0817	3.5193	4.1349	4.5595	4.9917	5.5905	6.0177	6.5216	7.0286	7.3279	7.9131	8.5286	9.049	9.8102	10.108	10.428	10.881	11.726	12.234	12.303	12.917	13.15	13.277	14.323	14.266	14.966
0.50186	1.0253	1.5097	2.0841	2.5467	3.033	3.5957	4.093	4.6313	4.9728	5.56	5.9964	6.5667	7.0168	7.4254	7.9003	8.5689	9.105	9.7954	10.033	10.413	10.897	11.726	12.285	12.528	12.881	13.114	13.241	14.094	14.189	15.205
0.48957	1.0043	1.5414	2.0567	2.6157	3.0747	3.5421	4.068	4.6313	5.0107	5.4492	5.9539	6.5554	7.1116	7.2795	7.9131	8.5555	9.2036	9.7513	10.123	10.49	10.802	11.593	12.182	12.337	12.81	13.15	13.332	14	14.439	14.947
0.49979	0.99739	1.5232	2.0567	2.5905	3.0122	3.5498	4.0763	4.5684	5.0202	5.3497	5.9645	6.5216	7.2312	7.2312	7.9771	8.5286	9.1472	9.678	10.018	10.443	11.04	11.659	12.131	12.616	12.721	12.97	13.405	14.075	14.266	14.966
0.49773	0.9905	1.4962	2.0622	2.5905	3.033	3.6035	4.0846	4.5416	5.0107	5.3695	6.0712	6.4209	7.2072	7.2674	8.0932	8.5152	9.1613	9.6634	10.123	10.382	11.201	11.709	11.927	12.563	12.704	12.828	13.423	13.943	14.304	15.165
0.49568	1.0182	1.5643	2.0567	2.6157	3.0399	3.4814	4.1097	4.5416	5.1542	5.4994	5.9964	6.3655	7.0997	7.2915	8.2235	8.542	9.1895	9.6342	10.229	10.382	11.12	11.593	11.877	12.424	12.774	13.168	13.386	13.831	14.323	15.105
0.49979	0.97683	1.5142	2.0677	2.553	3.0677	3.5193	4.0348	4.5416	5.1253	5.5803	6.0498	6.4879	7.1593	7.3644	8.0544	8.3818	9.1331	9.5905	10.244	10.382	11.088	11.511	11.978	12.355	13.024	12.935	13.46	13.849	14.381	15.006
0.49979	0.98365	1.5142	2.0677	2.5592	2.9985	3.489	4.0763	4.6313	5.0678	5.5905	5.9222	6.4767	7.2072	7.5114	8.0932	8.4616	9.0072	9.6634	10.244	10.321	11.072	11.659	11.995	12.459	12.935	13.06	13.496	13.831	14.497	15.145
0.48755	0.99739	1.5052	2.0951	2.5654	3.0677	3.5117	4.0514	4.5863	5.1157	5.5297	5.8591	6.4656	7.2674	7.3522	8.0544	8.475	8.9794	9.678	10.382	10.321	11.168	11.643	11.944	12.424	13.006	13.078	13.441	13.906	14.613	15.006
0.49979	0.98024	1.5007	2.0677	2.6157	3.0887	3.5345	4.1013	4.5595	5.0012	5.5095	5.8486	6.4992	7.1832	7.3765	8.0415	8.4483	9.1331	9.7513	10.078	10.413	11.104	11.61	11.911	12.441	12.792	13.132	13.626	13.887	14.594	14.966
0.4916	0.98365	1.5323	2.0677	2.6284	3.1521	3.4814	4.068	4.6947	5.0487	5.5905	5.8591	6.5329	7.1473	7.2915	8.1062	8.4083	9.0072	9.7954	10.305	10.552	11.136	11.527	11.894	12.389	12.739	12.863	13.552	13.849	14.535	14.986
0.5081	0.97004	1.5187	2.0951	2.6858	2.9369	3.5421	4.093	4.5416	4.9823	5.5803	5.9011	6.5441	7.1235	7.4009	8.1322	8.5824	9.0351	9.7366	10.033	10.614	11.249	11.494	11.995	12.528	12.704	13.06	13.46	13.906	14.555	15.145
0.49568	0.95991	1.5277	2.0951	2.6094	3.0399	3.5269	4.093	4.5684	5.0678	5.4392	5.8381	6.6574	7.0523	7.3522	8.1452	8.4616	9.0351	9.7219	10.244	10.536	11.12	11.347	11.944	12.651	12.757	13.168	13.533	14.056	14.535	15.125
0.49568	0.99394	1.4917	2.1228	2.6094	2.9779	3.5421	4.0846	4.5595	5.0965	5.5195	5.8906	6.612	7.0878	7.3765	8.1062	8.4216	8.8963	9.6488	9.9436	10.583	11.136	11.726	11.877	12.686	12.863	13.024	13.515	13.943	14.652	15.165
0.48554	0.99394	1.5097	2.0622	2.5905	3.0957	3.565	4.1097	4.5416	5.0012	5.56	5.9222	6.6233	7.1593	7.4009	8.1192	8.4483	8.9794	9.7366	10.154	10.583	11.12	11.527	11.894	12.563	12.739	12.988	13.46	13.906	14.574	15.165
0.47755	1.0008	1.5142	2.035	2.5592	3.0538	3.5881	4.1013	4.5774	5.0297	5.5702	5.9328	6.6006	7.1354	7.4745	8.0932	8.5152	9.0072	9.6196	10.351	10.614	11.04	11.478	11.927	12.389	12.757	13.132	13.423	13.7	14.574	15.225
0.4916	1.0008	1.5142	2.0296	2.6031	3.1027	3.6344	4.1181	4.5774	5.0869	5.6723	5.9751	6.6574	7.0759	7.3887	8.2366	8.5555	9.0351	9.8249	10.078	10.474	11.04	11.626	12.08	12.511	12.828	13.042	13.313	13.626	14.868	15.185
0.48957	0.97683	1.5414	2.0296	2.6031	3.0191	3.5498	4.1265	4.5416	5.1157	5.5195	5.9539	6.6688	7.0878	7.4009	8.1322	8.6229	9.1895	9.6051	10.214	10.521	11.104	11.676	12.131	12.581	12.97	12.988	13.441	14	14.907	15.245
0.49364	1.0182	1.5551	2.0622	2.5592	3.0053	3.5345	4.1097	4.6133	5.1639	5.4994	6.0071	6.6574	7.1832	7.3765	8.1452	8.65	9.049	9.7073	10.108	10.583	10.944	11.577	12.012	12.406	12.899	13.024	13.515	13.887	14.711	15.326
0.4916	0.99739	1.5597	2.0841	2.6284	3.0817	3.5881	4.0514	4.5684	4.8511	5.4994	5.9222	6.6347	7.0641	7.3887	8.0544	8.5018	9.063	9.6342	10.169	10.567	11.024	11.643	11.961	12.459	12.792	12.845	13.405	13.887	14.652	15.285
0.4916	1.0008	1.5505	2.035	2.5592	3.1097	3.5727	4.0431	4.5953	5.0202	5.5702	5.8906	6.5216	7.0997	7.4376	8.1062	8.5286	9.1472	9.766	10.063	10.49	10.817	11.676	12.012	12.459	12.792	12.81	13.46	13.924	14.535	15.185
0.49979	0.99394	1.5689	2.0896	2.6157	3.0468	3.5957	4.0846	4.6043	4.9823	5.5095	6.0605	6.6006	7.1473	7.4868	8.0286	8.6094	9.063	9.6196	10.018	10.459	11.024	11.593	11.944	12.459	12.952	12.863	13.386	14	14.535	15.145
0.47954	1.0078	1.5551	2.0786	2.5842	3.1168	3.5881	4.0846	4.6313	5.0582	5.4793	6.0605	6.612	7.1354	7.3644	8.1322	8.3156	9.077	9.9436	9.9585	10.351	11.008	11.577	11.826	12.476	13.042	13.006	13.405	13.793	14.458	15.145
0.49568	0.9905	1.5597	2.0404	2.6094	3.0677	3.5421	4.1013	4.5774	5.0107	5.56	6.082	6.612	7.1354	7.4376	8.0932	8.475	8.8824	9.6488	9.899	10.367	11.056	11.577	11.995	12.441	12.952	12.935	13.277	13.831	14.672	15.145
0.50186	0.97683	1.5597	2.0951	2.578	3.0677	3.5498	4.1181	4.7679	5.0107	5.5499	5.9645	6.578	7.1354	7.5609	8.0415	8.3552	8.9101	9.6051	10.078	10.275	11.056	11.544	11.978	12.511	12.952	12.881	13.386	13.868	14.633	15.225
0.49568	0.96328	1.5551	2.0896	2.6284	3.0538	3.5498	4.1517	4.6133	5.0202	5.4292	5.9964	6.612	7.1712	7.623	8.0415	8.4483	8.9101	9.6196	10.078	10.536	10.96	11.511	11.894	12.459	12.952	13.06	13.552	13.849	14.439	15.145
0.4916	1.0288	1.5414	2.0296	2.6031	3.0122	3.5269	4.1181	4.5774	5.0582	5.5095	5.9751	6.612	7.1832	7.5238	8.0932	8.2498	9.0072	9.6196	10.078	10.505	11.072	11.759	11.843	12.2	12.988	13.259	13.295	13.868	14.477	15.145
0.51865	0.97004	1.5459	2.1284	2.578	3.033	3.5421	4.1013	4.5684	4.9917	5.5195	6.0177	6.612	7.1473	7.4254	8.0544	8.4616	9.049	9.7073	10.214	10.598	11.024	11.759	11.995	12.389	12.952	13.114	13.313	13.906	14.613	15.105
0.48957	0.98024	1.5551	1.9179	2.6031	3.026	3.5345	4.0763	4.6133	5.0487	5.5398	5.9751	6.5893	7.1712	7.4499	7.9387	8.3024	9.0072	9.6342	10.078	10.661	11.008	11.626	11.978	12.686	13.06	13.114	13.441	13.756	14.535	14.966
0.48755	1.0043	1.5187	2.1451	2.6475	3.026	3.5041	4.093	4.6223	4.9258	5.5195	6.0284	6.5893	7.1235	7.4745	8.2629	8.4884	8.9239	9.547	10.184	10.567	11.008	11.494	12.012	12.511	13.06	13.024	13.386	13.737	14.75	15.085
0.48755	0.99394	1.5505	2.0731	2.6666	3.0122	3.5804	4.1013	4.5953	5.0107	5.56	5.9645	6.5104	7.1473	7.3887	8.1192	8.3818	9.063	9.4892	10.078	10.521	10.992	11.593	11.894	12.08	13.024	13.096	13.478	13.831	14.477	15.205
0.47755	0.95656	1.5828	2.0951	2.5968	3.0122	3.5193	4.1517	4.5774	5.0012	5.5095	5.9328	6.646	7.2674	7.4132	8.2366	8.3685	9.049	9.6488	10.169	10.598	10.944	11.643	12.08	12.389	13.024	13.006	13.441	13.906	14.613	15.306
0.47755	0.97343	1.5597	2.0786	2.5842	3.033	3.4966	4.0514	4.6313	4.9258	5.56	5.9011	6.6006	7.1235	7.34	8.1062	8.276	9.1191	9.6926	10.138	10.629	10.928	11.593	12.563	12.493	12.863	13.06	13.496	13.849	14.633	15.105
0.48554	0.98707	1.5232	2.0622	2.5905	3.0191	3.4739	4.3656	4.5595	5.0202	5.4793	5.8172	6.612	7.1235	7.4132	8.1974	8.5018	9.077	9.7366	10.214	10.583	11.104	11.593	12.097	12.721	12.845	13.096	13.552	13.793	14.458	15.085
0.48353	1.0253	1.5277	2.1507	2.6094	3.0538	3.4513	4.1181	4.5238	4.9634	5.4492	5.9433	6.5104	7.1593	7.5361	8.0415	8.4216	9.049	9.7219	10.321	10.552	11.12	11.593	11.944	12.493	12.633	13.078	13.515	13.793	14.458	15.125
0.48353	0.98024	1.5277	2.0731	2.6157	3.0887	3.5498	4.068	4.6133	5.0773	5.4093	5.9433	6.5667	7.1473	7.34	8.1712	8.5555	9.1331	9.6342	10.093	10.552	11.024	11.527	12.148	12.459	12.563	13.096	13.46	13.719	14.633	15.066
0.48353	1.0043	1.5459	2.0677	2.5842	3.0399	3.5269	4.1349	4.6223	5.0107	5.4093	5.88	6.5554	7.1952	7.4009	8.1582	8.4616	9.063	9.7219	10.093	10.505	10.833	11.643	11.927	12.406	12.546	12.952	13.405	13.737	14.516	15.285
0.47954	1.0394	1.5277	2.0677	2.6411	3.0122	3.5041	4.1433	4.7587	5.0107	5.4392	5.8486	6.578	7.0641	7.3765	8.0415	8.5152	9.0351	9.6051	10.078	10.583	10.928	11.56	11.995	12.251	12.598	12.828	13.478	13.737	14.672	15.306
0.48554	0.9905	1.5232	2.0896	2.6347	3.0747	3.4814	4.0597	4.5774	4.9634	5.4192	5.8906	6.5554	7.0878	7.4254	8.1452	8.4616	9.0351	9.6342	10.033	10.552	10.881	11.544	12.114	12.32	12.616	12.721	13.46	13.719	14.555	15.125
0.47361	1.0147	1.5505	2.0786	2.6221	3.1168	3.5421	4.1517	4.6133	4.954	5.5297	5.9328	6.5554	6.9933	7.3644	8.0544	8.4216	9.049	9.6634	10.078	10.459	10.96	11.676	12.148	12.372	12.633	12.81	13.368	13.868	14.868	15.105
0.49568	1.0043	1.5597	2.0841	2.5654	3.1097	3.5193	4.1097	4.6494	4.9352	5.5499	5.9858	6.4992	7.0404	7.4376	8.0544	8.5018	8.9655	9.6051	10.078	10.521	11.024	11.461	12.097	12.372	12.669	12.899	13.222	13.981	14.711	15.185
0.48755	0.99394	1.5323	2.0731	2.5343	3.1309	3.5041	4.1097	4.6403	4.954	5.6313	5.9964	6.5329	7.0878	7.4376	8.1062	8.5152	8.9933	9.678	10.093	10.707	11.008	11.461	11.894	12.389	12.845	12.899	13.259	14.019	14.672	14.947
0.4916	1.0113	1.5232	2.1006	2.5405	3.1309	3.4966	4.0763	4.6584	4.9445	5.6415	6.0177	6.4992	7.0641	7.4622	8.0415	8.5824	8.9516	9.6051	10.138	10.802	10.833	11.577	12.097	12.355	12.899	13.096	13.332	14.132	14.574	14.986
0.48755	0.97343	1.5277	2.0841	2.5592	3.1309	3.5269	4.1097	4.5953	4.9352	5.6313	5.9222	6.5104	7.1832	7.2915	8.1582	8.6094	9.0211	9.6051	10.169	10.552	10.976	11.626	11.86	12.337	12.828	13.078	13.35	14.094	14.711	15.447
0.49773	1.0113	1.5643	2.0841	2.5467	3.145	3.5041	4.1097	4.6133	4.907	5.6109	6.0071	6.5104	7.3522	7.3522	8.1192	8.542	9.077	9.6488	10.093	10.802	10.96	11.577	12.097	12.406	12.704	13.024	13.277	13.831	14.594	15.225
0.49364	1.0323	1.5323	2.0896	2.5842	3.1238	3.5193	4.1517	4.6313	4.9823	5.5905	5.9222	6.6917	7.2192	7.3158	8.0028	8.5018	9.077	9.6488	10.078	10.786	10.897	11.577	11.978	12.406	12.721	13.132	13.368	13.774	14.497	14.947
0.4916	1.0113	1.5597	2.0896	2.6538	3.1238	3.4364	4.1013	4.7404	5.0487	5.56	6.1142	6.5667	7.3765	7.4622	8.1452	8.4483	9.091	9.7954	10.138	10.567	11.072	11.544	12.063	12.476	12.704	13.078	13.368	13.607	14.809	14.907
0.48957	0.99739	1.5597	2.0458	2.6094	3.1027	3.5345	4.1265	4.6856	4.9728	5.5702	6.0391	6.772	7.2795	7.4132	8.2104	8.542	9.1895	9.7513	10.093	10.676	10.976	11.478	11.944	12.511	12.633	13.168	13.496	13.962	14.809	15.346
0.48755	0.97683	1.5052	2.0296	2.6284	3.033	3.5804	4.1349	4.6223	5.0012	5.5803	6.1791	6.578	7.2553	7.4132	8.1843	8.5286	9.1472	9.7073	10.093	10.645	10.849	11.61	12.182	12.563	12.721	13.15	13.368	13.868	14.868	15.085
0.49773	1.0008	1.5597	2.0188	2.6157	3.033	3.5269	4.1601	4.713	4.8511	5.5195	6.0177	6.6006	7.2915	7.4009	8.0673	8.6364	9.2036	9.7219	10.26	10.459	10.77	11.676	11.86	12.389	12.704	13.168	13.423	13.849	14.73	15.145
0.48755	1.0078	1.4873	2.0567	2.6475	3.026	3.5574	4.1433	4.6313	4.9164	5.5398	5.9751	6.646	7.2795	7.5485	8.0415	8.435	9.1331	9.6926	10.169	10.521	10.944	11.577	11.995	12.511	12.704	13.204	13.589	13.737	14.691	15.006
0.49979	1.0147	1.5232	2.0513	2.6157	3.0122	3.5498	4.093	4.6133	4.907	5.5297	5.88	6.5667	7.1712	7.4132	8.0673	8.4216	9.105	9.2461	10.199	10.382	11.152	11.56	11.995	12.493	12.845	13.259	13.423	13.868	14.574	14.907
0.48755	1.0288	1.5643	2.0622	2.6221	2.9985	3.3916	4.1013	4.5061	4.8883	5.5095	5.9751	6.578	7.2072	7.4376	8.0544	8.342	9.1191	9.7366	10.154	10.629	10.928	11.577	12.182	12.528	12.792	13.277	13.386	13.887	14.633	15.105
0.49568	1.05	1.5735	2.0951	2.5968	2.9847	3.5421	4.1265	4.5416	4.907	5.4592	5.9645	6.4209	7.1952	7.5114	8.0544	8.4083	9.091	9.8249	10.078	10.614	10.897	11.494	12.012	12.355	12.792	13.277	13.533	13.812	14.613	15.185
0.4916	0.99739	1.5368	2.0731	2.5905	3.0053	3.5345	4.093	4.6494	4.8977	5.4692	5.9222	6.5554	7.0997	7.4622	8.3156	8.395	9.1331	9.446	10.078	10.583	11.04	11.544	11.961	12.389	12.792	13.168	13.57	13.887	14.652	15.145
0.48957	1.0043	1.4873	2.1062	2.5968	3.0122	3.5421	4.1685	4.5953	5.0012	5.5499	6.0177	6.4432	7.0878	7.5238	8.1712	8.395	9.1331	9.6634	10.169	10.474	10.96	11.676	12.097	12.546	12.845	13.277	13.35	13.962	14.4	15.306
0.50601	1.0078	1.5097	2.0458	2.5905	2.9779	3.4739	4.1939	4.5863	4.9634	5.6313	6.0071	6.5554	7.1593	7.4868	8.0673	8.4216	9.2461	9.6051	10.169	10.443	10.944	11.709	12.165	12.372	12.863	13.332	13.57	13.962	14.613	15.066
0.54697	1.0182	1.5232	2.0731	2.6157	3.0122	3.6499	4.1517	4.6494	4.9728	5.4093	6.0605	6.4432	7.1712	7.4745	7.9387	8.3552	9.2177	9.5615	10.123	10.305	10.96	11.676	12.234	12.406	12.935	13.204	13.644	13.681	14.439	15.066
0.4916	1.0078	1.5187	2.0296	2.578	3.0538	3.4966	4.1601	4.5416	4.9917	5.4592	5.9645	6.5554	7.1593	7.4376	7.9515	8.5152	9.0211	9.5905	10.063	10.521	10.912	11.693	12.131	12.251	12.669	13.332	13.607	13.831	14.652	15.105
0.48153	0.9532	1.5597	2.0458	2.6666	3.0607	3.4589	4.1855	4.5327	4.9823	5.5297	6.0605	6.5216	7.1235	7.4745	7.9643	8.5152	8.9377	9.6634	10.108	10.443	10.849	11.693	12.097	12.459	12.669	13.186	13.533	13.924	14.75	15.165
0.49979	0.99739	1.5187	2.0896	2.578	3.0468	3.489	4.1349	4.5863	4.954	5.4893	5.9645	6.4767	7.1952	7.4868	8.0803	8.5824	8.8687	9.5325	10.154	10.443	10.77	11.81	12.114	12.493	12.546	13.078	13.515	13.906	14.711	15.066
0.48957	0.98365	1.5323	2.0622	2.5905	3.026	3.5193	4.1601	4.5684	4.9728	5.5499	6.0712	6.578	7.0641	7.4376	7.8876	8.6094	8.8687	9.547	10.138	10.428	11.088	11.894	11.894	12.633	12.899	13.277	13.533	13.887	14.497	15.125
0.47755	1.0043	1.5232	2.0896	2.6411	3.0747	3.5345	4.1433	4.5505	4.9634	5.5297	6.0605	6.5893	7.2433	7.3279	7.9643	8.542	8.8687	9.5615	10.184	10.474	10.96	11.643	12.097	12.633	12.81	13.024	13.441	13.962	14.75	15.125
0.48353	0.96666	1.5323	2.0896	2.6347	3.0468	3.5041	4.1097	4.5505	4.954	5.5398	6.0071	6.5441	7.1832	7.4868	8.0157	8.6229	8.9516	9.547	10.184	10.459	11.072	11.726	12.131	12.581	13.132	12.97	13.441	13.681	14.535	15.165
0.48957	0.99739	1.5097	2.0677	2.5905	3.026	3.489	4.0763	4.5774	4.9258	5.56	5.9433	6.5667	7.2312	7.4376	8.0028	8.475	8.9516	9.547	10.154	10.275	11.12	11.759	12.114	12.581	12.757	13.313	13.533	13.849	14.652	15.185
0.47558	0.98024	1.5097	2.035	2.6538	3.0191	3.5269	4.1433	4.5953	4.9823	5.5499	6.0391	6.6233	7.1832	7.3887	7.8621	8.5555	8.9655	9.5905	10.199	10.428	10.928	11.626	12.165	12.528	13.024	13.024	13.332	13.906	14.555	15.066
0.46387	0.9905	1.5277	1.9973	2.578	3.0191	3.5498	4.1601	4.5684	5.0392	5.5398	6.1142	6.6347	7.2312	7.4009	7.9259	8.6094	8.9377	9.6051	10.229	10.367	11.088	11.643	12.217	12.563	12.845	13.241	13.46	13.962	14.439	15.165
0.48755	0.97004	1.5142	2.0567	2.5654	2.971	3.4966	4.2024	4.5863	4.907	5.6109	5.9433	6.6347	7.4009	7.4499	7.8494	8.6229	8.9933	9.678	10.199	10.367	11.056	11.511	12.097	12.441	12.792	13.168	13.441	13.831	14.535	14.947
0.5081	0.99394	1.5551	2.0404	2.5968	3.026	3.489	4.1097	4.5863	4.9728	5.5905	6.082	6.5329	7.2553	7.4132	8.0028	8.5824	9.0072	9.7073	10.305	10.443	11.072	11.626	12.114	12.493	12.952	13.114	13.496	14.019	14.594	15.085
0.5102	0.95991	1.5414	2.0622	2.6347	3.0399	3.5498	4.1097	4.6947	5.0012	5.5499	6.0177	6.578	7.1354	7.4499	7.9643	8.6094	9.049	9.7073	10.305	10.521	10.865	11.643	12.029	12.511	12.669	12.988	13.423	14	14.4	15.205
0.50393	0.97683	1.5414	2.0786	2.5654	3.0399	3.5117	4.1433	4.6043	5.0582	5.5702	6.0284	6.5329	7.2433	7.4376	7.9643	8.542	8.9655	9.6051	10.367	10.536	10.976	11.511	11.995	12.633	12.917	12.899	13.405	13.962	14.477	15.185
0.49979	0.96328	1.5921	2.035	2.5905	2.9985	3.489	4.1433	4.6313	5.0773	5.5803	6.0927	6.5554	7.3887	7.4745	7.9003	8.7179	8.9101	9.5325	10.367	10.459	11.024	11.593	12.029	12.511	12.899	12.97	13.368	13.943	14.458	14.986
0.50186	1.0043	1.5414	2.0677	2.5968	3.0747	3.5727	4.1517	4.6584	5.0678	5.4893	6.0712	6.6233	7.2795	7.5238	8.1322	8.6771	9.0351	9.5325	10.305	10.459	11.056	11.428	11.911	12.406	12.792	13.114	13.186	13.868	14.458	15.026
0.48957	1.0288	1.5368	2.0951	2.578	3.026	3.4589	4.1013	4.5684	4.9823	5.5297	6.0071	6.6006	7.2553	7.5361	8.1192	8.5824	9.049	9.5615	10.138	10.459	11.04	11.56	11.978	12.355	12.792	13.096	13.386	13.906	14.789	15.085
0.50601	1.0113	1.5187	2.1062	2.6284	3.0468	3.4814	4.093	4.5684	5.0202	5.5398	6.0927	6.578	7.2433	7.6604	7.9771	8.4483	9.049	9.6342	10.275	10.614	11.104	11.478	12.029	12.441	12.616	13.114	13.15	13.756	14.73	15.085
0.50186	1.0113	1.5967	2.1062	2.6094	3.0747	3.4513	4.1181	4.6133	4.9917	5.5195	6.1358	6.6347	7.2915	7.5857	7.99	8.5555	9.077	9.7513	10.184	10.567	11.136	11.428	11.911	12.372	12.616	13.078	13.368	13.812	14.809	15.427
0.49364	1.0113	1.5368	2.0841	2.6411	3.0053	3.5193	4.0431	4.6133	5.0012	5.5195	6.082	6.6233	7.2433	7.3279	8.0157	8.5555	9.049	9.7366	10.138	10.521	11.185	11.461	11.877	12.406	12.704	13.06	13.868	14	14.711	15.326
0.4916	0.99739	1.6249	2.0404	2.5968	3.0677	3.4589	4.1517	4.5774	4.9823	5.4592	6.082	6.6574	7.2072	7.4499	8.0028	8.542	8.9794	9.766	10.123	10.552	11.185	11.461	12.114	12.459	12.704	12.97	13.57	13.868	14.868	15.225
0.48957	1.0008	1.5097	2.0896	2.6094	3.1168	3.5421	4.1265	4.5953	5.0678	5.4793	6.0498	6.6006	7.2915	7.4868	7.9387	8.5959	9.1191	9.7219	10.063	10.367	11.088	11.593	11.944	12.528	12.828	12.988	13.35	13.924	14.769	15.245
0.48353	1.0043	1.5505	2.0404	2.5968	3.0957	3.5345	4.068	4.6043	4.9823	5.4793	6.0284	6.6233	7.1354	7.4132	7.9643	8.6364	9.049	9.678	10.229	10.536	11.088	11.314	12.029	12.406	12.863	12.863	13.607	13.943	14.691	15.225
0.48755	1.0043	1.5142	2.0622	2.5717	2.9166	3.5881	4.0846	4.5684	4.9728	5.4994	6.0284	6.6006	7.1473	7.3644	7.9771	8.5824	9.077	9.5615	10.123	10.536	10.992	11.544	11.995	12.459	12.774	12.863	13.57	13.831	14.809	15.046
0.5081	1.0078	1.5052	2.0896	2.6538	3.1097	3.5421	4.1433	4.5416	5.0297	5.4592	6.0391	6.4992	7.3279	7.4132	7.9259	8.5689	9.091	9.7073	10.048	10.49	10.992	11.478	11.995	12.476	12.828	12.863	13.441	13.774	14.613	15.105
0.49364	1.0043	1.5007	2.0567	2.6031	2.9916	3.5421	4.1601	4.5505	5.0582	5.4292	6.0712	6.5329	7.2795	7.3765	8.0028	8.542	9.1472	9.6196	10.018	10.49	10.96	11.478	12.012	12.511	12.863	13.06	13.441	13.831	14.633	15.145
0.5123	0.98707	1.5323	2.0513	2.6221	3.1663	3.5421	4.1265	4.5505	5.0487	5.4392	6.2336	6.5667	7.2312	7.4254	7.9387	8.5152	9.1191	9.5615	9.8841	10.474	10.976	11.593	11.877	12.424	12.828	13.096	13.423	13.607	14.633	15.326
0.52079	0.9532	1.5459	2.1006	2.6987	2.9505	3.5574	4.1433	4.5061	4.9445	5.5095	5.9964	6.6574	7.1593	7.4376	7.9643	8.4884	8.8549	9.6342	9.9734	10.367	10.912	11.396	12.029	12.546	12.633	12.935	13.644	13.906	14.711	15.265
0.50393	0.97004	1.5232	2.0622	2.6157	3.0607	3.4966	4.2109	4.5953	5.1061	5.4093	6.0391	6.5104	7.1593	7.4376	8.0673	8.5018	9.1191	9.446	10.123	10.629	10.754	11.412	11.978	12.598	12.669	13.241	13.663	13.7	14.555	15.205
0.4916	0.9905	1.5142	2.1173	2.5592	3.1238	3.5269	4.1939	4.5774	5.0392	5.4893	6.0712	6.612	7.1952	7.4254	8.0286	8.5018	8.9794	9.4892	10.018	10.413	10.976	11.461	11.894	12.581	12.721	12.845	13.7	13.849	14.516	15.326
0.48957	0.9532	1.5232	2.0786	2.6475	3.0538	3.5117	4.1601	4.5863	5.0107	5.3398	6.1358	6.6347	7.2072	7.4376	8.1062	8.4216	9.0072	9.4604	10.093	10.521	10.833	11.676	11.826	12.704	12.563	12.881	13.663	13.981	14.247	14.927
0.48957	0.94986	1.5414	2.0731	2.6602	3.026	3.4739	4.1601	4.5953	5.0297	5.4192	5.9751	6.6006	7.3037	7.4745	8.1712	8.6229	8.9655	9.4892	10.169	10.536	10.992	11.445	11.759	12.581	12.845	12.952	13.7	14.056	14.362	15.105
0.47558	0.96328	1.5277	2.0841	2.6538	3.026	3.5345	4.1685	4.5953	5.0392	5.4292	5.9539	6.7031	7.3158	7.5485	8.0415	8.4483	9.091	9.6196	10.154	10.598	11.363	11.593	11.843	12.669	12.774	12.952	13.7	13.962	14.439	14.966
0.49568	0.97683	1.5142	2.1395	2.5281	3.0607	3.4664	4.1181	4.6133	5.0012	5.3596	5.9964	6.646	7.2192	7.6479	8.0028	8.542	8.9239	9.5615	10.244	10.521	11.12	11.56	11.944	12.511	12.881	12.988	13.57	13.962	14.458	14.986
0.48353	0.98365	1.4784	2.0786	2.6411	3.026	3.4739	4.1181	4.6133	4.9917	5.3794	6.0071	6.6574	7.2795	7.5114	8.0028	8.6094	9.0211	9.576	10.169	10.567	11.104	11.726	12.063	12.669	12.81	12.845	13.681	13.924	14.439	14.947
0.48153	0.99394	1.5187	2.0896	2.5842	3.0399	3.565	4.1181	4.5684	4.9823	5.4093	5.9645	6.5893	7.2433	7.5238	8.0028	8.5018	9.0211	9.6342	10.229	10.552	11.04	11.61	11.978	12.511	12.828	13.096	13.496	13.924	14.439	14.947
0.48353	1.0043	1.5232	2.1173	2.6411	2.9985	3.5117	4.1517	4.6313	4.9728	5.4692	6.1035	6.6006	7.2192	7.5981	7.9771	8.5824	9.077	9.7073	10.244	10.645	10.992	11.626	12.029	12.493	12.792	13.024	13.607	14.056	14.4	14.907
0.48554	0.98365	1.5007	2.0513	2.5717	3.0677	3.4966	4.1349	4.5684	4.9917	5.4093	6.0391	6.6574	7.1712	7.6729	8.0286	8.4884	8.9377	9.8102	10.305	10.614	11.12	11.527	12.029	12.389	12.845	13.006	13.222	14	14.4	15.026
0.48153	0.99394	1.4917	2.0513	2.553	3.033	3.5498	4.1349	4.6043	4.8232	5.4492	6.082	6.7375	7.1712	7.6355	7.9131	8.5824	9.077	9.8102	10.26	10.645	11.136	11.56	12.012	12.389	12.686	13.204	13.478	13.831	14.535	14.927
0.48153	0.99394	1.5052	2.1006	2.5717	2.9985	3.5041	4.1265	4.5863	4.9917	5.4192	5.9964	6.646	7.1593	7.6855	7.9003	8.5689	9.0211	9.8693	10.275	10.598	11.024	11.693	12.08	12.459	12.774	13.168	13.295	13.906	14.594	15.026
0.47165	1.0253	1.4962	2.1173	2.6094	3.0607	3.5117	4.1265	4.6313	4.9352	5.6109	5.9964	6.5554	7.1354	7.5361	7.8494	8.5152	9.049	9.7513	10.367	10.645	10.865	11.347	12.182	12.303	12.633	13.042	13.368	13.774	14.594	14.986
0.48153	1.0288	1.5007	2.0841	2.5717	3.0677	3.5498	4.093	4.5416	4.9728	5.4093	6.0177	6.5893	7.1473	7.4745	7.8748	8.4483	9.049	9.5905	10.351	10.49	11.008	11.544	12.08	12.424	12.828	13.078	13.515	13.812	14.672	15.085
0.47558	1.0182	1.5142	2.0896	2.578	3.0607	3.5269	4.0431	4.5953	4.907	5.5195	6.0605	6.612	7.1235	7.4745	7.9259	8.435	8.9655	9.6634	10.49	10.474	10.912	11.61	12.029	12.459	12.721	12.988	13.368	13.924	14.594	14.947
0.49773	0.99739	1.5142	2.1062	2.5905	3.0957	3.4739	4.068	4.6043	4.9352	5.4492	6.0712	6.6233	7.1593	7.4745	7.7735	8.6229	9.1191	9.6488	10.382	10.598	10.992	11.843	12.131	12.424	12.935	13.15	13.589	13.831	14.711	15.105
0.48755	1.0182	1.5142	2.0786	2.6221	3.0538	3.5269	3.9772	4.6133	4.8977	5.5803	5.9645	6.6347	7.0878	7.4622	7.7735	8.435	9.1754	9.6488	10.244	10.583	10.992	11.233	12.217	12.424	12.81	13.06	13.46	13.868	14.907	15.105
0.48755	0.98365	1.5187	2.0896	2.6411	2.971	3.4814	4.0183	4.5953	4.9164	5.5195	6.0284	6.6233	7.0168	7.4622	7.8876	8.3685	9.0211	9.7219	10.413	10.413	10.944	11.56	12.303	12.493	12.81	13.06	13.515	13.887	14.672	15.105
0.48554	1.0008	1.5323	2.0622	2.6411	3.0053	3.489	4.1517	4.6313	4.9823	5.5702	6.0284	6.6006	7.0168	7.3887	7.8876	8.342	8.9794	9.6051	10.29	10.397	10.881	11.56	12.355	12.441	12.792	13.204	13.533	13.812	14.652	15.066
0.47954	0.98707	1.5323	2.0786	2.5968	3.1027	3.4214	4.1433	4.6043	4.9634	5.6415	6.0284	6.578	7.1593	7.2433	7.99	8.5286	9.063	9.5905	10.169	10.382	10.833	11.659	12.114	12.493	12.81	13.132	13.46	13.831	14.691	14.907
0.48153	1.0008	1.5097	2.0731	2.5842	3.0538	3.4589	4.2279	4.5953	4.9634	5.4392	6.1142	6.5667	7.2192	7.3765	8.0803	8.4884	9.077	9.6342	10.275	10.29	10.817	11.643	11.877	12.372	12.774	13.168	13.533	13.793	14.555	15.066
0.48755	1.0043	1.5232	2.0896	2.5717	3.0399	3.4664	4.1013	4.6313	4.9728	5.5398	6.0284	6.5667	7.2795	7.3887	8.1192	8.5689	9.049	9.678	10.123	10.336	10.802	11.527	12.012	12.389	12.774	13.168	13.496	13.812	14.613	15.105
0.48554	1.0008	1.4873	2.134	2.578	3.0191	3.5041	4.1013	4.6403	4.9823	5.4893	6.1358	6.6347	7.2795	7.34	7.99	8.475	8.8411	9.6488	10.123	10.428	10.817	11.511	12.029	12.372	12.828	12.988	13.57	13.831	14.711	15.185
0.48755	0.99394	1.5368	2.1563	2.553	3.0677	3.5957	4.0763	4.7221	5.0107	5.5398	6.0391	6.749	7.3887	7.3522	7.9003	8.5018	8.9933	9.5615	10.244	10.382	10.897	11.527	12.097	12.337	12.863	12.899	13.589	13.793	14.594	15.205
0.48957	0.99739	1.5505	2.1284	2.5842	3.0399	3.5957	4.1013	4.713	5.0582	5.5095	6.0927	6.5554	7.2553	7.3887	7.9387	8.6364	9.049	9.8102	10.123	10.505	11.008	11.61	12.114	12.32	13.096	13.042	13.57	13.756	14.691	15.205
0.47361	1.0147	1.5277	2.0513	2.578	3.0607	3.565	4.1013	4.6403	5.1446	5.5095	6.19	6.5893	7.3887	7.3765	8.0157	8.4616	9.0211	9.6634	10.214	10.459	10.96	11.363	12.063	12.424	12.721	13.132	13.496	13.756	14.594	15.265
0.47165	1.0217	1.5597	2.035	2.578	3.0538	3.5117	4.1013	4.713	5.0582	5.5095	6.1575	6.6006	7.3887	7.4499	7.9643	8.4616	8.8549	9.576	10.169	10.536	11.072	11.445	12.046	12.389	12.633	13.006	13.405	14	14.652	15.306
0.4916	0.97343	1.5142	2.035	2.6411	3.033	3.4814	4.2792	4.5238	4.9823	5.4893	6.125	6.5893	7.4009	7.4009	7.8876	8.542	9.063	9.5181	10.123	10.598	10.992	11.626	12.046	12.268	12.581	13.06	13.515	14.094	14.672	15.326
0.49773	1.0113	1.5368	2.0513	2.6157	3.1027	3.5193	4.1685	4.5863	4.9352	5.5297	6.082	6.5329	7.34	7.4009	8.0157	8.395	9.091	9.5036	10.199	10.567	11.04	11.56	12.012	12.234	12.739	13.042	13.496	14.094	14.769	15.366
0.48153	0.99394	1.5187	2.0188	2.6094	2.971	3.5498	4.2194	4.4707	4.9164	5.5398	6.0605	6.5554	7.3644	7.4376	7.9003	8.5555	9.0072	9.5036	10.123	10.413	10.96	11.659	12.114	12.337	12.651	13.006	13.552	14.17	14.828	15.406
0.48957	1.0043	1.5368	2.0731	2.6157	3.0468	3.5421	4.2621	4.6494	4.907	5.5499	6.0605	6.5893	7.2553	7.4376	7.8114	8.5152	8.7043	9.6488	10.199	10.428	11.056	11.659	11.944	12.389	12.739	12.97	13.46	13.793	14.594	15.285
0.48957	0.97683	1.5414	2.0567	2.6284	2.9985	3.5574	4.2024	4.6043	5.0012	5.6313	6.1035	6.5667	7.3522	7.5238	7.9515	8.5286	9.0072	9.576	10.199	10.552	11.056	11.593	11.944	12.217	12.721	12.881	13.533	13.756	14.555	15.205
0.49364	0.98707	1.5505	2.0622	2.6157	3.0053	3.5804	4.1601	4.6403	5.0869	5.5803	6.0605	6.6233	7.1832	7.4132	7.9515	8.5286	9.091	9.6342	10.108	10.645	11.088	11.61	12.131	12.372	12.704	13.096	13.441	13.644	14.75	15.245
0.48755	0.9532	1.5551	2.0567	2.6221	3.0957	3.565	4.1433	4.5505	5.0773	5.5499	6.0498	6.5329	7.2192	7.4009	7.9131	8.5689	8.9655	9.6342	10.199	10.583	11.201	11.593	12.148	12.372	12.739	13.295	13.423	13.719	14.711	15.285
0.49568	0.95991	1.5505	2.0841	2.6347	3.0468	3.5269	4.1433	4.5149	4.954	5.5499	5.9858	6.4879	7.2553	7.34	7.9003	8.5555	8.9516	9.6196	10.063	10.614	11.282	11.61	12.012	12.686	12.81	13.204	13.405	13.812	14.652	15.066
0.48957	0.98024	1.5735	2.0404	2.6031	3.0677	3.5345	4.2024	4.4005	4.9258	5.4492	6.0071	6.5216	7.1952	7.4991	7.9387	8.6635	9.1191	9.6342	10.244	10.583	11.185	11.577	11.995	12.493	12.863	13.078	13.441	13.774	14.789	15.225
0.50186	0.99739	1.5828	2.0731	2.6031	3.026	3.5804	4.2024	4.5863	4.9917	5.6211	6.1035	6.4209	7.1832	7.3765	7.8876	8.5152	9.1191	9.5325	10.184	10.614	11.072	11.593	12.114	12.285	12.952	13.241	13.496	13.812	14.769	15.205
0.49979	0.97683	1.5597	2.0622	2.5717	3.0399	3.5498	4.177	4.5149	5.0107	5.5398	6.0712	6.612	7.1952	7.4499	7.9131	8.6229	9.0072	9.6634	10.305	10.645	10.992	11.527	12.046	11.626	12.845	13.06	13.441	13.719	14.769	15.165
0.48554	0.96328	1.5735	2.0786	2.5968	3.0468	3.5574	4.1013	4.5416	5.0107	5.5195	6.0071	6.6688	7.1952	7.3765	7.9387	8.5286	8.9377	9.6926	10.336	10.552	10.96	11.544	12.063	12.563	12.739	13.204	13.277	13.7	14.574	15.285
0.46774	0.96328	1.5597	2.0242	2.6475	3.026	3.5574	4.1601	4.5061	5.0487	5.56	5.9645	6.5554	7.1952	7.5114	7.9259	8.4483	9.1895	9.4892	10.428	10.459	11.008	11.461	12.097	12.511	12.757	13.024	13.186	13.663	14.633	15.285
0.47954	0.97683	1.5735	1.9866	2.6031	3.0607	3.5421	4.1433	4.6675	4.9823	5.5297	5.9116	6.4992	7.1952	7.3522	8.0028	8.4616	8.9516	9.7513	9.9436	10.536	11.04	11.494	12.165	12.476	12.774	13.096	13.386	13.589	14.907	15.346
0.50393	0.93326	1.5597	2.1117	2.6347	3.0747	3.565	4.1517	4.6223	4.9917	5.6007	5.9433	6.5554	7.1473	7.3887	8.0673	8.5824	8.9101	9.7807	10.169	10.474	11.072	11.511	12.029	12.493	12.739	13.114	13.57	13.552	14.711	15.346
0.50186	1.0217	1.5689	2.0731	2.6347	3.0677	3.5574	4.068	4.6765	4.9823	5.4994	5.9433	6.612	7.0878	7.4132	8.1192	8.5286	8.9516	9.7073	10.214	10.367	10.992	11.527	12.029	12.424	12.828	12.917	13.57	13.793	14.458	15.406
0.50601	1.0078	1.5277	2.1006	2.6411	3.0677	3.5345	4.1601	4.5327	4.9258	5.5702	5.9328	6.5216	7.0997	7.4254	8.1452	8.7999	8.9933	9.6342	10.244	10.229	11.088	11.396	11.86	12.581	12.881	13.006	13.515	13.719	14.672	15.165
0.49979	1.0008	1.5368	2.0841	2.6411	3.1027	3.5574	3.9936	4.5863	4.9917	5.4994	5.9222	6.5216	7.0641	7.4622	8.0932	8.8274	9.0351	9.5615	10.29	10.397	11.04	11.379	12.097	12.511	13.096	12.917	13.46	13.719	14.672	15.185
0.46969	0.9532	1.5414	2.0622	2.6347	3.0191	3.565	4.177	4.5774	4.9917	5.3794	5.9222	6.5329	7.2312	7.4254	8.2366	8.4483	8.8136	9.5325	10.321	10.505	11.024	11.527	12.114	12.581	12.917	12.988	13.405	13.607	14.73	15.245
0.48957	0.9905	1.5277	2.0841	2.6666	3.033	3.565	4.1601	4.5238	4.7587	5.4893	5.9539	6.5441	7.1116	7.4745	7.9771	8.6094	8.9655	9.6634	10.169	10.583	11.024	11.593	11.877	12.424	13.024	12.863	13.552	13.681	14.516	15.306
0.48554	0.98024	1.5187	2.0731	2.6411	3.026	3.6266	4.093	4.4883	4.9823	5.662	5.9433	6.4321	7.3765	7.5114	7.9771	8.7452	8.9933	9.547	10.169	10.583	11.072	11.643	12.165	12.493	13.114	12.917	13.478	13.756	14.828	15.066
0.48554	1.0288	1.5323	2.0458	2.6031	2.9985	3.5574	4.1265	4.6403	4.9728	5.4492	5.9539	6.3213	7.2553	7.4991	8.0286	8.7452	8.9655	9.5181	10.093	10.552	11.104	11.527	11.995	12.493	12.81	12.97	13.533	13.868	14.652	15.185
0.49364	1.0394	1.5459	2.0731	2.6475	3.0053	3.5574	4.1013	4.6403	4.9634	5.5095	5.8696	6.5441	7.2312	7.5114	7.9771	8.6907	9.0211	9.4604	10.26	10.536	11.008	11.793	12.046	12.528	12.686	13.06	13.478	14.037	14.809	15.046
0.48153	0.99394	1.5277	2.0677	2.6475	2.9985	3.5117	4.093	4.6403	4.9634	5.5702	5.8696	6.5104	7.2072	7.5361	8.0157	8.3818	8.9933	9.4748	10.199	10.598	10.897	11.776	12.046	12.651	12.739	13.204	13.589	13.981	14.247	15.185
0.48957	0.99394	1.5414	2.0786	2.6987	2.9985	3.5727	4.1181	4.6856	5.0965	5.5195	6.0177	6.4992	7.1832	7.623	7.9771	8.5286	9.049	9.6634	10.033	10.676	11.168	11.793	12.114	12.493	12.739	13.241	13.607	13.924	14.458	15.366
0.48957	0.9905	1.5187	2.0786	2.5968	3.0957	3.5193	4.093	4.5863	4.9634	5.4592	6.0177	6.3323	7.1712	7.4499	7.99	8.435	9.077	9.5325	10.214	10.583	11.185	11.743	12.148	12.406	12.792	13.277	13.644	13.962	14.574	15.085
0.49979	1.0043	1.5142	2.0841	2.5905	3.0607	3.4513	4.093	4.5774	4.8604	5.4893	5.9964	6.5441	7.1593	7.3887	7.9515	8.5286	9.1472	9.6196	10.244	10.459	11.104	11.626	11.995	12.459	12.774	13.259	13.607	13.981	15.006	15.185
0.49568	0.98707	1.5323	2.0677	2.6411	3.0399	3.5117	4.2194	4.5595	5.0012	5.5499	5.9751	6.5554	7.2433	7.4376	7.9003	8.5018	9.0072	9.446	10.244	10.459	11.185	11.61	12.012	12.441	12.633	13.132	13.46	13.831	14.828	15.125
0.48957	1.0113	1.5232	2.0677	2.673	3.0053	3.5193	4.1517	4.5953	4.9445	5.4292	6.0177	6.6688	7.1473	7.6604	7.9643	8.65	8.9101	9.5905	10.336	10.598	11.04	11.544	12.029	12.459	12.739	13.042	13.46	14.151	14.574	15.185
0.49979	0.98365	1.5505	2.1507	2.6602	3.0957	3.5269	4.1013	4.5684	4.8977	5.5499	5.9539	6.6233	7.1593	7.4622	8.0157	8.5018	9.0351	9.6196	10.305	10.459	11.088	11.544	12.131	12.424	12.721	12.935	13.423	14.189	14.907	15.185
0.49364	0.99394	1.5232	2.0458	2.6411	3.1027	3.7124	4.2109	4.5505	4.9634	5.4793	6.0177	6.5893	7.1116	7.6105	7.9131	8.5824	9.063	9.678	10.336	10.536	11.104	11.61	11.793	12.493	12.881	13.096	13.57	14.17	14.75	15.185
0.48755	0.99394	1.5232	2.0731	2.6157	3.1592	3.5041	4.1265	4.5863	5.0965	5.56	5.9645	6.6006	7.1354	7.5609	7.9771	8.4884	8.9933	9.7073	10.275	10.739	11.088	11.709	12.063	12.511	12.669	13.114	13.368	14.056	14.73	15.225
0.49979	0.99394	1.6249	2.0134	2.6538	3.0887	3.6035	4.1181	4.6223	4.907	5.5195	5.9328	6.5893	7.1593	7.4622	7.9771	8.5555	9.0211	9.7366	10.199	10.629	11.024	11.61	11.961	12.493	12.739	13.15	13.441	14.132	14.73	15.006
0.49773	1.0078	1.5368	2.0296	2.6031	3.1027	3.5727	4.245	4.5061	4.9728	5.5905	5.9328	6.6006	7.1712	7.2192	7.9003	8.4483	9.0351	9.6634	10.321	10.49	11.136	11.445	12.114	12.546	12.581	13.114	13.313	13.887	14.497	15.046
0.53812	0.98707	1.4917	2.0841	2.6475	3.1097	3.5193	4.1013	4.6133	5.0392	5.5702	5.9964	6.6006	7.0286	7.4254	8.0028	8.435	9.0351	9.5905	10.367	10.614	11.152	11.478	11.978	12.669	12.633	13.114	13.478	13.981	14.652	14.887
0.48755	0.99739	1.5828	2.1117	2.6221	3.0957	3.5957	4.1265	4.6133	4.9823	5.5398	5.9328	6.5329	7.2072	7.4745	8.0286	8.475	9.0211	9.6634	10.29	10.336	11.088	11.478	12.046	12.493	12.633	13.096	13.478	14	14.594	14.966
0.4916	0.98707	1.682	2.035	2.5592	3.0399	3.565	4.1265	4.6494	5.0107	5.5297	6.0391	6.4767	7.1952	7.4622	7.9515	8.5018	8.9933	9.6342	10.244	10.552	11.249	11.412	12.029	12.424	12.792	13.132	13.441	13.849	14.594	15.085
0.48957	0.97004	1.5735	2.0951	2.553	3.0677	3.5269	4.1097	4.5416	4.9634	5.5297	6.0071	6.5329	6.958	7.5114	8.0157	8.4884	9.0072	9.6051	10.275	10.26	10.992	11.428	11.843	12.372	12.828	13.006	13.441	13.906	14.574	15.225
0.48554	1.0288	1.4962	2.0567	2.6157	3.0747	3.5345	4.1097	4.5595	5.0392	5.4893	6.082	6.5329	7.2072	7.4499	8.0028	8.4483	8.8963	9.5615	10.305	10.459	11.04	11.396	12.029	12.406	12.739	12.935	13.552	13.7	14.516	15.125
0.47954	1.0043	1.5097	2.0786	2.6094	3.0191	3.5193	4.1433	4.5953	4.9917	5.5095	6.0498	6.4767	7.1952	7.4254	8.1452	8.4216	8.9516	9.5181	10.154	10.49	11.072	11.445	11.995	12.528	12.651	12.952	13.515	13.681	14.458	15.145
0.47755	1.0078	1.5323	2.0951	2.578	3.0191	3.565	4.1181	4.6313	5.0202	5.4692	5.9222	6.5893	7.0641	7.4745	7.99	8.5018	9.105	9.6634	10.413	10.443	10.928	11.494	11.743	12.511	12.704	12.899	13.681	13.793	14.458	15.145
0.48957	0.97004	1.5323	2.0622	2.5096	3.0399	3.6035	4.0846	4.6043	5.1061	5.6313	5.8696	6.4992	7.0997	7.4376	8.0286	8.5018	9.063	9.576	10.474	10.336	10.96	11.379	11.995	12.528	12.828	12.792	13.663	14.056	14.574	15.125
0.49979	0.98365	1.5459	2.0951	2.5281	3.0677	3.6189	4.1265	4.6133	5.1446	5.5195	5.7341	6.6006	7.0641	7.5114	7.9643	8.6094	9.049	9.5181	10.336	10.521	10.928	11.412	12.012	12.528	12.863	13.096	13.496	13.962	14.672	15.125
0.49364	1.0008	1.5232	2.0242	2.5467	3.033	3.5957	4.1181	4.5774	5.0773	5.5702	5.9858	6.5441	7.0404	7.4991	8.0028	8.4884	9.2036	9.7219	10.413	10.154	10.96	11.527	12.063	12.424	12.881	13.042	13.774	13.924	14.711	15.205
0.49364	1.0043	1.5459	2.1062	2.6987	3.0468	3.5193	3.9445	4.5416	5.0107	5.5905	6.0391	6.578	7.1116	7.4254	7.9387	8.5689	9.049	9.5036	10.305	10.474	11.008	11.363	12.046	12.528	12.881	13.078	13.607	13.924	14.672	15.066
0.4916	1.0147	1.5323	2.0677	2.5968	3.0399	3.5345	4.1013	4.4619	5.0012	5.6007	6.0498	6.6006	7.0997	7.5238	7.9387	8.5018	9.077	9.5036	10.336	10.443	10.928	11.494	12.046	12.563	12.863	12.988	13.681	13.756	14.691	15.225
0.50186	1.0008	1.5551	2.0677	2.5467	3.0399	3.5421	4.1097	4.6223	5.0773	5.6007	6.0498	6.5329	7.0997	7.4868	8.0415	8.5689	8.8687	9.5905	10.214	10.443	11.04	11.428	11.995	12.337	12.581	12.988	13.681	13.962	14.691	15.145
0.51653	1.0217	1.5414	2.1062	2.5905	3.0468	3.565	4.093	4.5774	4.9823	5.5803	6.0284	6.4321	7.0997	7.4376	7.9643	8.5689	8.9933	9.6926	10.26	10.367	11.072	11.643	11.86	12.355	12.493	13.078	13.386	13.943	14.691	15.285
0.48554	0.98707	1.5597	2.1117	2.5592	3.033	3.5193	4.1013	4.5774	4.9728	5.5398	5.9751	6.7146	7.0404	7.4991	7.8876	8.6229	8.9933	9.7073	10.184	10.474	11.12	11.396	11.978	12.528	12.633	13.096	13.57	13.924	14.594	15.346
0.49773	0.97683	1.5505	2.1006	2.5905	3.0468	3.5193	4.1097	4.5149	4.9823	5.5905	5.9645	6.4879	7.0286	7.5238	8.0028	8.6229	8.9933	9.678	10.138	10.583	11.024	11.445	11.978	12.563	12.721	13.006	13.386	13.812	14.691	15.245
0.50186	0.97343	1.5551	2.0458	2.5968	3.0399	3.5574	4.0431	4.6043	5.0202	5.5803	6.0284	6.5104	7.1593	7.4132	8.0544	8.6364	8.9516	9.7073	10.093	10.536	11.152	11.61	11.793	12.493	12.81	12.917	13.332	13.962	14.574	15.185
0.49979	0.99739	1.5368	2.0786	2.5467	3.0053	3.5193	4.1181	4.6313	5.0297	5.6109	5.9964	6.5554	7.0641	7.4745	7.99	8.5959	8.9933	9.5615	10.108	10.505	10.96	11.577	12.182	12.493	12.616	12.881	13.405	14.056	14.672	15.185
0.4916	0.99394	1.5277	2.0622	2.6031	3.0399	3.5193	4.093	4.6223	4.9823	5.56	5.9645	6.5216	7.2312	7.5981	7.9131	8.435	8.9377	9.576	10.154	10.459	10.96	11.626	12.251	12.511	12.881	12.917	13.332	13.756	14.789	14.907
0.47954	0.98024	1.5323	2.1228	2.6411	3.1027	3.5193	4.1685	4.5774	5.0202	5.5905	5.8172	6.6233	7.2072	7.5361	7.9771	8.6229	8.9655	9.6196	10.093	10.614	11.024	11.626	11.877	12.476	12.899	13.024	13.313	13.906	14.828	15.205
0.48353	0.99394	1.5323	2.1117	2.6094	3.0817	3.5041	4.177	4.5595	5.0678	5.5499	5.9751	6.6688	7.2072	7.4991	8.1582	8.6229	9.105	9.547	10.184	10.428	10.944	11.478	11.978	12.511	12.651	13.006	13.478	13.943	14.887	14.986
0.47954	0.99394	1.5459	2.0622	2.5842	3.0817	3.5193	4.1517	4.5505	5.0965	5.4492	5.9539	6.6347	7.1952	7.4991	7.9259	8.4216	9.091	9.5036	10.154	10.583	11.008	11.726	12.08	12.633	12.97	13.078	13.607	13.924	14.652	14.769
0.49979	1.0008	1.5505	2.0513	2.5219	3.0399	3.5193	4.0431	4.5327	5.0297	5.4893	5.9539	6.646	7.2915	7.4991	7.9771	8.435	9.1613	9.5181	10.093	10.336	10.976	11.478	12.114	12.704	12.845	13.024	13.812	14.151	14.633	15.245
0.49568	0.9905	1.5551	2.0841	2.5968	3.0677	3.4438	4.0348	4.5863	4.9823	5.4592	5.9222	6.5893	7.2072	7.4991	8.1712	8.4216	9.1331	9.3742	10.033	10.413	11.04	11.577	12.182	12.546	12.792	13.096	13.496	13.812	14.555	15.145
0.48353	0.98024	1.5323	2.0677	2.6475	3.0677	3.4814	4.0846	4.6223	5.0869	5.5398	5.9116	6.6006	7.2192	7.4622	8.0803	8.475	9.1331	9.3886	9.9585	10.443	11.168	11.577	12.029	12.441	12.917	13.186	13.607	14.439	14.535	15.265
0.49568	0.95991	1.5277	2.0458	2.6602	3.0538	3.4739	4.1685	4.6043	5.1157	5.5499	5.9539	6.5667	7.1952	7.5485	7.9003	8.4616	8.9655	9.5181	10.078	10.598	11.201	11.726	12.063	12.476	12.863	13.114	13.441	13.981	14.516	15.205
0.50186	0.99394	1.5142	2.0567	2.6094	3.033	3.4739	4.1265	4.5953	5.1542	5.5398	5.9645	6.5104	7.3037	7.4376	7.9131	8.5286	9.049	9.547	10.138	10.49	11.024	11.793	12.012	12.669	12.935	13.06	13.533	13.849	14.555	15.285
0.49364	1.0008	1.5277	2.0404	2.5968	2.9985	3.5193	4.068	4.5327	5.1446	5.4994	5.9751	6.4544	7.1473	7.5981	8.0286	8.5689	9.0351	9.6051	10.033	10.583	11.168	11.56	11.978	12.616	12.917	13.06	13.423	14.056	14.711	15.285
0.5102	0.95991	1.5187	2.0513	2.6411	3.0677	3.5574	4.2109	4.5061	5.0965	5.5195	5.8381	6.4992	7.2553	7.5361	7.9003	8.5555	8.9239	9.5325	10.078	10.505	11.008	11.461	12.114	12.528	12.774	13.186	13.386	13.812	14.828	15.245
0.5081	0.98707	1.5459	2.0458	2.5968	3.0677	3.5345	4.1097	4.5774	5.0678	5.5905	6.0284	6.4879	7.2312	7.5733	8.0028	8.5152	9.0072	9.678	10.138	10.521	11.088	11.676	12.148	12.337	12.563	13.168	13.533	13.756	14.769	15.185
0.49979	1.0008	1.5232	2.0951	2.5905	2.9301	3.5117	4.1013	4.6494	5.0582	5.5499	5.9858	6.4656	7.1354	7.4622	8.0286	8.4616	9.0211	9.6196	10.214	10.428	11.249	11.676	12.182	12.406	12.774	13.277	13.478	13.793	14.868	15.245
0.48755	1.0288	1.5097	2.1228	2.5467	3.0053	3.5421	4.1097	4.6043	5.0773	5.5095	6.0177	6.5329	7.1712	7.5485	8.0673	8.395	8.9516	9.7366	10.138	10.49	11.233	11.659	11.978	12.32	12.721	13.277	13.277	13.943	14.73	15.165
0.48554	1.0043	1.5368	2.0951	2.5842	2.9985	3.489	4.1685	4.5505	5.0487	5.6007	5.9116	6.6574	7.2433	7.4991	7.99	8.435	9.0211	9.7073	10.184	10.474	11.347	11.826	12.063	12.32	12.792	13.204	13.496	14	14.711	15.105
0.48755	0.99739	1.4873	2.0622	2.5968	3.0053	3.5193	4.1685	4.5774	5.0012	5.6007	6.0177	6.6802	7.2312	7.5361	8.0028	8.3024	9.049	9.6342	10.199	10.397	11.056	11.61	12.131	12.406	12.721	13.006	13.204	14.037	14.633	14.986
0.49364	1.0078	1.5142	2.0404	2.5842	3.0468	3.5574	4.177	4.6494	4.954	5.56	5.9433	6.612	7.1235	7.5238	7.9259	8.342	9.0211	9.6196	10.229	10.443	11.12	11.511	12.029	12.355	12.774	13.078	13.57	14.019	14.711	14.986
0.49568	1.0008	1.5368	2.0951	2.5905	3.026	3.5804	4.2194	4.6043	4.8977	5.6313	6.0284	6.6574	7.1832	7.4745	8.0157	8.3818	9.0072	9.7073	10.336	10.505	10.976	11.626	12.08	12.285	12.686	13.114	13.515	13.868	14.497	15.185
0.48554	1.0043	1.5505	2.0896	2.6221	3.0607	3.5574	4.1265	4.5774	4.9352	5.5905	6.082	6.646	7.0997	7.4868	8.0028	8.4216	9.0211	9.6926	10.351	10.552	11.056	11.577	12.08	12.32	12.739	13.241	13.042	13.868	14.419	15.046
0.48957	0.97343	1.5505	2.0951	2.5717	2.9916	3.5269	4.2792	4.5684	4.907	5.6007	5.9964	6.612	7.0641	7.4991	7.9387	8.342	9.1191	9.6196	10.351	10.536	11.136	11.626	11.944	12.355	12.81	13.114	13.607	13.831	14.711	14.966
0.4916	0.98365	1.4917	2.1006	2.6157	2.9916	3.5421	4.2109	4.5505	4.9728	5.6211	6.0071	6.578	7.0997	7.4991	7.99	8.3818	9.1472	9.576	10.305	10.428	11.008	11.511	11.927	12.493	12.633	12.988	13.57	13.981	14.613	15.046
0.50601	0.98365	1.5187	2.0896	2.6221	3.0053	3.565	4.1685	4.5149	4.879	5.6211	5.9222	6.5554	7.1116	7.5238	7.9259	8.3156	9.049	9.6634	10.336	10.505	10.865	11.544	11.961	12.511	12.757	13.042	13.589	13.831	14.4	14.73
0.48957	0.94986	1.4962	2.0896	2.578	3.0122	3.5957	4.1013	4.3917	4.9352	5.6109	6.082	6.5104	7.2072	7.4622	8.0673	8.4216	8.9794	9.6488	10.29	10.583	11.072	11.511	12.131	12.355	12.441	13.06	13.386	14.037	14.439	15.046
0.48153	0.9532	1.5142	2.1228	2.6284	3.026	3.5193	4.1517	4.4619	4.9258	5.6211	6.0284	6.4992	7.1473	7.5114	8.1192	8.3685	9.1613	9.5615	10.244	10.244	10.865	11.396	12.165	12.389	12.686	13.006	13.423	13.812	14.594	15.285
0.47361	0.96328	1.5643	2.1117	2.5592	3.0399	3.6035	4.1013	4.4707	4.9728	5.6109	5.9858	6.4767	7.2072	7.5485	8.0932	8.3552	9.1191	9.576	10.351	10.351	11.185	11.428	12.114	12.303	12.721	13.132	13.423	14.094	13.496	15.145
0.47755	0.99394	1.5459	2.0622	2.6157	3.0399	3.6344	4.093	4.5505	4.9917	5.6109	5.7964	6.578	7.1593	7.4254	8.0544	8.3024	9.0351	9.6196	10.229	10.382	11.04	11.511	11.961	12.476	12.774	13.06	13.496	13.887	14.594	15.205
0.47755	1.0288	1.4917	2.0296	2.5096	2.9642	3.5957	4.1685	4.6223	5.0297	5.4292	6.0605	6.4544	7.1712	7.3522	8.0286	8.4216	9.0072	9.6634	10.214	10.351	11.072	11.428	12.012	12.303	12.899	12.988	13.663	14.189	14.672	15.185
0.47954	1.0078	1.5142	2.0242	2.578	3.026	3.6344	4.1517	4.5238	4.9823	5.6211	6.0498	6.4879	7.1354	7.4132	7.9643	8.5152	8.9655	9.7073	10.244	10.413	11.104	11.577	11.944	12.476	12.633	13.15	13.496	14.113	14.652	15.185
0.49773	0.98024	1.4917	2.0731	2.553	2.9779	3.6189	4.1265	4.5416	4.9728	5.4692	5.9645	6.6233	7.0878	7.3887	8.0415	8.5152	8.9655	9.6342	10.214	10.397	11.12	11.511	11.911	12.337	12.739	13.042	13.644	14.132	14.633	15.265
0.47954	0.98707	1.5323	2.0622	2.6157	2.9916	3.6344	4.0846	4.5061	4.9634	5.4893	5.9011	6.6574	7.0404	7.3522	8.0415	8.4483	8.7725	9.5905	10.214	10.351	11.282	11.511	12.046	12.424	12.546	13.006	13.478	14.019	14.633	15.285
0.5081	1.0008	1.5142	2.0731	2.5842	3.0399	3.5881	4.1013	4.6043	4.907	5.4893	6.0284	6.612	7.1116	7.3522	8.0415	8.3288	9.0351	9.547	10.184	10.397	11.265	11.428	11.978	12.285	12.704	12.792	13.626	13.943	14.789	15.185
0.5081	0.98707	1.5414	2.0677	2.5968	3.0191	3.5117	4.0763	4.5505	4.9634	5.5095	5.9645	6.6917	6.9815	7.4622	7.9515	8.5959	8.9516	9.4748	10.169	10.459	11.265	11.676	11.961	12.441	12.828	13.042	13.57	14.019	14.809	15.225
0.48957	0.98365	1.5414	2.0731	2.5968	3.0747	3.5345	4.1517	4.6043	4.9728	5.4292	6.082	6.6233	6.8995	7.4622	8.0544	8.435	8.9377	9.4604	10.397	10.428	11.249	11.527	11.995	12.757	12.863	12.988	13.719	13.943	14.75	15.066
0.50601	0.9905	1.5232	2.0622	2.5968	3.0887	3.565	4.1601	4.6043	4.9445	5.5398	6.0071	6.6802	7.005	7.4991	7.99	8.3156	9.049	9.4748	10.397	10.459	11.088	11.445	12.046	12.476	12.988	12.97	13.663	13.868	14.439	14.947
0.51441	0.97004	1.5052	2.0567	2.5905	3.0607	3.5421	4.0348	4.5863	4.9258	5.4994	6.1142	6.6802	7.005	7.4991	8.0157	8.5152	8.9377	9.5615	10.154	10.459	11.12	11.494	11.961	12.459	12.845	12.917	13.774	13.906	14.4	15.165
0.5102	0.97343	1.4873	2.0841	2.6475	3.0191	3.565	4.0597	4.6313	4.9258	5.4592	6.1035	6.6917	7.0878	7.4622	8.0157	8.5018	8.9101	9.6196	10.321	10.474	10.928	11.793	11.894	12.528	12.917	12.988	13.626	13.906	14.574	15.026
0.49568	0.98707	1.5187	2.1006	2.6347	3.0468	3.5193	4.0763	4.6494	4.8977	5.5095	5.9645	6.6574	7.0641	7.5238	8.0157	8.4483	9.0211	9.5325	10.244	10.536	11.04	11.961	11.826	12.528	12.935	12.917	13.607	13.831	14.594	15.006
0.49773	0.97004	1.5551	2.0841	2.6157	3.0957	3.5193	4.0266	4.7038	4.9352	5.4692	6.0177	6.6006	7.0286	7.5485	7.99	8.3024	9.049	9.6051	10.229	10.567	11.168	11.659	11.776	12.355	12.97	13.024	13.515	13.737	14.828	15.165
0.50186	0.9905	1.5277	2.0731	2.5654	3.0957	3.5574	4.068	4.6313	4.9728	5.4492	6.0284	6.6917	7.0641	7.4991	8.1062	8.3818	9.077	9.6926	10.154	10.552	11.136	11.626	12.012	12.459	12.792	12.988	13.533	13.719	14.535	15.085
0.50601	0.98365	1.5097	2.0786	2.5717	3.0399	3.5345	4.1349	4.5774	4.9634	5.4592	6.0605	6.6233	7.1116	7.5361	8.0544	8.542	9.0351	9.6926	10.214	10.583	10.897	11.659	11.995	12.476	12.598	12.988	13.533	13.793	14.633	15.046
0.50186	0.98707	1.5414	2.0458	2.5654	3.033	3.4664	4.1349	4.6856	4.9728	5.4994	6.1575	6.726	7.1832	7.5609	8.1974	8.2892	9.049	9.678	10.214	10.552	10.96	11.511	12.182	12.598	12.899	13.15	13.423	14	14.691	15.006
0.50186	0.97343	1.5414	2.0296	2.5717	3.0191	3.4513	4.1265	4.6584	4.9445	5.5499	6.1575	6.6233	7.1235	7.5485	8.1843	8.4483	9.091	9.678	10.275	10.459	10.944	11.56	12.097	12.546	12.721	12.952	13.478	13.887	14.73	15.205
0.5102	0.97683	1.5689	2.0951	2.5219	3.0747	3.4214	4.0846	4.5684	4.8883	5.4692	6.1142	6.5667	7.1473	7.4991	8.2498	8.4483	8.9516	9.7073	10.26	10.521	10.976	11.693	12.217	12.476	12.739	13.006	13.496	13.831	14.672	14.986
0.49364	0.96666	1.5597	2.1173	2.5717	3.0677	3.4513	4.1685	4.6403	5.0869	5.4592	6.082	6.5667	7.1116	7.4868	8.0932	8.4216	9.049	9.6196	10.29	10.583	11.233	11.726	12.268	12.406	12.757	12.899	13.46	13.868	14.711	15.265
0.50601	0.97343	1.5597	2.0731	2.5654	3.0957	3.5193	4.1349	4.5863	4.8604	5.5095	5.9645	6.5554	7.0641	7.4622	8.1974	8.4616	9.077	9.678	10.214	10.521	11.298	11.759	12.2	12.424	12.81	13.024	13.496	13.737	14.633	15.046
0.49364	0.98707	1.5187	2.0567	2.6094	3.0677	3.5574	4.1097	4.6133	5.0582	5.4994	6.0605	6.5667	7.0641	7.623	8.1712	8.5018	9.1191	9.6634	10.169	10.459	10.928	11.843	12.148	12.563	12.774	12.917	13.405	13.756	14.986	15.066
0.48755	0.99739	1.5052	2.0731	2.6221	3.0607	3.5804	4.1601	4.5953	5.0202	5.5499	6.0177	6.4992	7.005	7.4991	8.1974	8.4483	8.9655	9.6634	10.033	10.382	11.024	11.61	12.165	12.528	12.774	12.952	13.313	13.812	14.927	15.366
0.48755	0.96328	1.5551	2.0622	2.5905	3.0607	3.5574	4.177	4.5863	5.0202	5.5195	6.0391	6.6233	7.0168	7.4868	8.1452	8.4884	9.1754	9.678	10.018	10.397	11.12	11.363	12.131	12.616	12.917	12.952	13.132	13.831	14.633	15.326
0.48554	0.9905	1.5142	2.1117	2.6347	3.033	3.5804	4.1433	4.5953	4.954	5.56	6.0712	6.5441	7.1712	7.4254	8.1712	8.5018	9.077	9.7513	10.108	10.382	11.072	11.544	12.165	12.598	12.81	12.988	13.277	13.906	14.535	15.346
0.47755	1.0113	1.5277	2.1117	2.6157	3.0747	3.565	4.1097	4.5863	4.9164	5.4592	5.9858	6.4992	7.1473	7.4376	8.1192	8.5018	9.1191	9.5905	9.8841	10.321	10.912	11.527	12.217	12.563	12.721	12.988	13.313	14.075	14.711	15.346
0.48554	1.0078	1.5414	2.0951	2.6411	3.1097	3.5498	4.1349	4.5863	5.0582	5.4592	6.0391	6.4656	7.2072	7.4622	8.0673	8.4083	9.0351	9.6342	10.033	10.29	11.072	11.428	12.08	12.493	12.739	13.441	13.186	14.056	14.828	15.671
0.47755	1.0078	1.5505	2.0841	2.6411	2.9166	3.565	4.177	4.6133	4.954	5.5297	6.0284	6.4767	7.1832	7.4745	8.0415	8.475	9.1331	9.4748	10.169	10.351	11.185	11.347	12.165	12.633	12.651	13.042	13.259	14.037	14.809	15.346
0.49364	0.97004	1.5097	2.0841	2.6221	3.0817	3.5041	4.1601	4.6947	4.9634	5.5095	6.0498	6.3765	7.1832	7.4376	8.0415	8.4483	9.1191	9.8102	10.138	10.443	11.201	11.298	12.114	12.459	12.669	12.935	13.277	14.132	14.809	15.225
0.48957	1.0078	1.5097	2.0951	2.6221	3.0887	3.5269	4.1601	4.5684	5.1349	5.5297	6.0284	6.6006	7.2192	7.4132	7.9771	8.542	9.049	9.7366	10.154	10.382	11.056	11.428	12.165	12.669	12.669	13.024	13.496	14.132	14.691	15.225
0.4916	1.0217	1.5052	2.1451	2.6475	3.0538	3.5574	4.1349	4.5863	5.0012	5.5398	5.8486	6.4767	7.1593	7.4376	7.9771	8.4884	9.077	9.5615	10.154	10.413	10.976	11.379	12.097	12.528	12.563	13.114	13.533	13.962	14.691	15.085
0.48957	0.99394	1.5097	2.1117	2.6475	2.9985	3.5727	4.1433	4.6223	4.9634	5.5803	5.9116	6.4321	7.1116	7.4132	8.0932	8.5286	8.9794	9.5615	10.275	10.413	11.088	11.379	12.182	12.355	12.704	13.186	13.644	14.037	14.652	15.245
0.4916	1.0043	1.5459	2.1062	2.6411	3.0468	3.6035	4.1601	4.4972	4.9823	5.56	5.9222	6.5216	7.0641	7.4254	7.9771	8.4616	9.0211	9.6051	10.214	10.521	11.233	11.445	12.148	12.424	12.633	13.06	13.607	14.094	14.769	15.447
0.48554	1.0043	1.5459	2.0622	2.6794	3.0817	3.6421	4.1433	4.6403	5.0773	5.5095	6.0498	6.5329	7.0641	7.4376	8.0157	8.5018	9.0351	9.576	10.138	10.49	11.008	11.577	12.285	12.563	12.792	13.168	13.515	14.056	14.711	15.306
0.5123	1.0113	1.5007	2.0188	2.6347	3.0191	3.5041	4.1433	4.6494	4.9728	5.5398	6.0391	6.5216	7.1116	7.3887	7.9131	8.276	8.9794	9.766	10.184	10.536	11.201	11.461	12.528	12.424	12.881	12.881	13.515	14.056	14.458	15.145
0.48957	1.0008	1.5323	2.134	2.6284	3.0538	3.4814	4.1433	4.5238	4.9823	5.5297	6.2009	6.5104	7.3279	7.4499	7.9771	8.3552	8.9101	9.8545	10.169	10.552	11.104	11.56	12.217	12.493	12.774	13.06	13.533	14.056	14.555	15.026
0.47755	0.97683	1.5232	2.1563	2.5717	3.0607	3.5727	4.1855	4.5595	4.814	5.5398	6.1466	6.4544	7.2674	7.34	7.9771	8.475	8.8687	9.6342	10.199	10.536	11.12	11.527	12.182	12.616	13.006	13.042	13.849	13.962	14.672	15.066
0.5081	0.99739	1.4873	2.1062	2.5592	3.0607	3.5117	4.1349	4.4443	4.9728	5.4994	6.1035	6.4209	7.1832	7.4132	8.0286	8.4884	9.091	9.678	10.305	10.598	10.992	11.593	12.2	12.563	12.899	12.988	13.737	13.962	14.323	15.006
0.4916	1.0078	1.5368	2.1117	2.6221	3.0747	3.5117	4.1265	4.5238	4.9917	5.5095	6.125	6.5893	7.1952	7.3279	8.0157	8.4884	8.9377	9.7954	10.26	10.49	11.008	11.577	12.2	12.511	12.828	13.024	13.46	14.075	14.497	14.986
0.50186	0.99394	1.5232	2.0677	2.553	3.0538	3.5041	4.1601	4.5595	4.9728	5.4692	6.0498	6.5667	7.2674	7.4376	7.9771	8.5959	8.9239	9.5615	10.123	10.49	11.217	11.626	12.32	12.182	12.845	13.078	13.423	14.037	14.477	15.285
0.49568	1.0078	1.5277	2.0951	2.5968	3.026	3.4966	4.1601	4.5953	4.9445	5.3695	6.0177	6.5329	7.2674	7.4376	8.0673	8.5824	9.1472	9.8397	10.108	10.428	10.992	11.676	12.251	12.511	12.828	13.15	13.478	14.247	14.652	15.205
0.50393	1.0288	1.5277	2.0951	2.5654	3.026	3.5193	4.0763	4.5774	4.954	5.4592	6.0284	6.4209	7.3037	7.4991	8.0157	8.4483	9.0351	9.7073	9.9585	10.397	10.96	11.577	12.217	12.441	12.935	13.078	13.46	14.075	14.652	15.105
0.48755	1.0078	1.5323	2.0677	2.5592	3.0468	3.5498	4.068	4.6133	5.0107	5.6109	6.0605	6.4992	7.2795	7.2795	8.0673	8.4483	9.105	9.678	10.184	10.459	11.185	11.461	12.165	12.32	12.863	13.096	13.496	13.924	14.4	15.185
0.50186	1.0253	1.5052	2.1117	2.6221	3.0538	3.5041	4.1013	4.6133	5.0582	5.4793	5.9858	6.5329	7.3037	7.4499	7.9643	8.5286	9.2036	9.6926	10.214	10.474	11.168	11.659	12.046	12.493	12.899	13.078	13.515	13.906	14.633	15.066
0.48554	1.0217	1.5643	1.9653	2.6602	3.0677	3.5193	4.2024	4.5684	4.9728	5.5702	6.0498	6.4098	7.3158	7.3522	8.2235	8.3818	9.063	9.5325	10.123	10.474	11.152	11.726	12.012	12.511	12.988	13.132	13.533	13.981	14.362	15.225
0.4916	0.98707	1.5232	2.0841	2.5842	3.0468	3.4589	4.0101	4.5416	4.9445	5.4392	6.0605	6.5104	7.2312	7.4745	8.2104	8.2892	9.1191	9.5181	10.063	10.459	11.04	11.726	12.046	12.424	12.863	13.096	13.46	13.906	14.516	15.265
0.5102	1.0217	1.5097	2.0677	2.6284	2.9985	3.5804	4.1013	4.5684	4.9164	5.5398	6.0284	6.5329	7.1712	7.4868	8.1974	8.395	9.105	9.6926	10.169	10.443	10.881	11.676	12.046	12.459	12.704	13.277	13.552	14	14.711	15.105
0.49364	0.98707	1.5689	2.0677	2.6794	2.9916	3.5421	4.1181	4.5863	4.954	5.6109	5.9751	6.6574	7.1712	7.4132	7.99	8.3685	9.077	9.6634	10.154	10.552	11.088	11.61	11.995	12.511	12.739	13.15	13.46	13.831	14.477	15.046
0.47361	0.9905	1.5597	2.0567	2.6411	3.026	3.4589	4.1601	4.5595	4.9728	5.6211	5.9751	6.4656	7.1593	7.4991	7.99	8.5824	9.1191	9.678	10.093	10.49	11.136	11.593	12.2	12.511	12.686	13.024	13.478	13.887	14.574	15.006
0.48957	1.0147	1.5505	1.9653	2.6094	3.0607	3.5193	4.0597	4.5238	4.9445	5.5095	6.0284	6.578	7.0878	7.4991	8.1582	8.5689	9.1331	9.7366	10.184	10.505	11.024	11.709	12.165	12.424	12.863	13.204	13.552	13.943	14.439	14.986
0.48755	0.98024	1.5277	2.0731	2.6538	3.033	3.5881	4.093	4.5863	4.9258	5.5803	5.9751	6.5554	7.1473	7.6729	8.1452	8.5018	9.063	9.7073	10.169	10.413	10.944	11.676	11.961	12.441	12.739	13.042	13.719	13.812	14.516	15.165
0.49364	0.98024	1.5368	2.0622	2.6794	2.9985	3.5727	4.1517	4.6133	4.9634	5.5803	5.9645	6.5216	7.4132	7.5238	8.0932	8.395	9.077	9.5615	10.199	10.536	10.849	11.643	11.978	12.355	12.792	13.096	13.57	14.019	14.304	15.046
0.50186	0.99739	1.5187	2.0677	2.6475	3.033	3.5193	4.1433	4.6313	4.9823	5.5398	5.9751	6.646	7.1235	7.4991	7.9643	8.435	9.105	9.6051	10.169	10.865	10.992	11.61	12.114	12.528	12.792	13.042	13.57	14.056	14.439	15.066
0.49568	0.94986	1.5505	2.035	2.6221	3.0122	3.5193	4.1097	4.6584	5.0012	5.6007	6.0071	6.612	7.0641	7.4254	8.0157	8.5152	9.1754	9.6634	10.214	10.723	11.104	11.56	12.131	12.598	12.863	13.078	13.607	14	14.342	15.066
0.50186	0.99739	1.5232	2.1006	2.5968	3.0399	3.4513	4.1517	4.6584	4.9917	5.5803	6.1358	6.5554	7.0997	7.5981	7.9131	8.4483	9.1191	9.6926	10.229	10.29	11.04	11.428	12.2	12.476	12.97	13.114	13.644	13.849	14.613	15.046
0.49568	0.99394	1.5643	2.0731	2.6411	3.026	3.5193	4.0763	4.5774	4.9258	5.5499	6.082	6.726	7.1593	7.4622	8.0544	8.4884	9.105	9.7513	10.244	10.459	10.928	11.494	12.046	12.563	12.952	13.024	13.441	13.868	14.497	15.046
0.4916	0.9905	1.5368	2.0786	2.6284	3.0468	3.5804	4.093	4.5953	5.0202	5.5195	5.9858	6.646	7.1473	7.4254	7.9515	8.5286	9.1613	9.678	10.123	10.382	11.024	11.56	12.182	12.493	12.899	12.97	13.423	13.719	14.574	15.285
0.48957	0.97683	1.5142	2.0841	2.5842	3.0607	3.5727	4.0431	4.5863	5.0202	5.4392	6.1358	6.5893	7.1354	7.3765	7.8494	8.5018	9.1191	9.6634	10.093	10.598	11.072	11.577	12.097	12.616	12.739	12.935	13.295	14.037	14.711	15.105
0.49773	1.0008	1.5368	2.0841	2.578	3.033	3.5345	4.1181	4.6403	5.0392	5.662	6.125	6.612	7.1116	7.4622	7.8621	8.4884	8.9933	9.7219	10.244	10.305	11.056	11.56	12.012	12.616	12.651	12.863	13.793	13.943	14.594	15.125
0.48755	1.0182	1.5052	2.0622	2.578	3.0677	3.5881	4.1349	4.4972	5.0678	5.5499	6.1035	6.578	7.0759	7.4991	7.9771	8.5018	8.8824	9.6196	10.275	10.661	11.024	11.494	12.097	12.251	12.651	12.774	13.15	13.981	14.497	14.927
0.48153	0.99394	1.5187	2.0677	2.6157	3.1097	3.5345	4.0763	4.6043	4.954	5.6211	5.9858	6.7146	7.1593	7.3887	7.6479	8.542	8.9101	9.6926	10.321	10.536	11.217	11.593	12.08	12.372	12.633	12.899	13.812	14.132	14.927	14.691
0.47165	0.98707	1.4962	2.0731	2.5905	3.1309	3.5269	4.1517	4.5684	4.9917	5.6415	6.0927	6.612	7.1354	7.5238	8.0157	8.5152	8.9377	9.6196	10.305	10.676	11.379	11.527	12.012	12.581	12.686	12.97	13.589	14.056	14.439	14.828
0.48755	0.98365	1.4917	2.0731	2.5405	3.1168	3.5498	4.0597	4.5774	4.9917	5.5905	6.1575	6.5216	7.0997	7.5114	7.9515	8.435	8.8824	9.8397	10.367	10.552	11.136	11.659	12.097	12.355	12.616	12.899	13.368	13.774	14.477	14.809
0.52293	0.99739	1.5781	2.0786	2.6031	3.0817	3.4589	4.1181	4.5684	4.9352	5.6211	6.1575	6.6233	7.0286	7.4745	8.0803	8.4083	8.8824	9.5905	10.123	10.536	11.314	11.494	12.029	12.32	12.616	12.881	13.756	13.887	14.574	14.927
0.49364	0.97343	1.5187	2.1006	2.578	3.0887	3.5957	4.0763	4.6313	5.0297	5.5803	5.9858	6.3765	7.1712	7.4132	7.99	8.435	8.8687	10.154	10.26	10.598	11.088	11.544	12.012	12.563	12.81	13.096	13.552	13.868	14.672	15.066
0.48755	0.99394	1.5232	2.0951	2.6411	3.1238	3.5804	4.1181	4.6403	4.9917	5.5905	5.9858	6.3987	7.2674	7.5733	8.0157	8.4216	8.8411	9.6926	10.199	10.474	11.152	11.544	12.046	12.598	12.81	13.222	13.515	13.943	14.828	15.125
0.48554	0.96328	1.5368	2.1006	2.6347	3.1521	3.4214	4.0763	4.6043	5.0107	5.5803	6.0284	6.6574	7.1712	7.5609	8.0544	8.5689	8.8549	9.6196	10.244	10.552	11.445	11.494	12.046	12.546	12.917	13.132	13.405	13.868	14.73	15.066
0.47954	0.98024	1.5368	2.0896	2.5842	3.0957	3.4664	3.9608	4.6856	4.9634	5.56	6.0605	6.6233	7.005	7.4868	7.99	8.5152	8.8136	9.5036	10.138	10.305	11.104	11.478	12.063	12.424	12.97	13.114	13.441	13.962	14.711	15.105
0.49568	1.0078	1.5323	2.0567	2.6094	3.1097	3.5574	4.1013	4.5774	4.954	5.4893	6.0498	6.6688	7.1235	7.4868	8.0415	8.542	8.8549	9.6342	10.108	10.536	11.024	11.412	12.476	12.563	12.881	13.024	13.496	13.962	14.477	15.125
0.47361	1.0078	1.5459	2.0296	2.5968	3.0677	3.489	4.1181	4.6043	5.1639	5.5499	6.0712	6.4432	7.2192	7.4991	7.9387	8.5018	9.0351	9.678	10.078	10.629	11.136	11.347	12.012	12.476	12.792	13.06	13.478	14.17	14.613	15.185
0.50393	1.0078	1.5142	2.0513	2.6221	3.0747	3.5117	4.068	4.6133	5.0582	5.5398	6.1035	6.578	7.1712	7.5361	8.0286	8.4483	9.0211	9.766	10.275	10.723	11.217	11.544	12.08	12.528	12.935	13.15	13.386	14.094	14.574	15.125
0.5102	0.98024	1.5459	2.0513	2.5905	3.0887	3.565	4.1181	4.6223	5.0297	5.5499	6.0712	6.612	7.0523	7.5238	7.9771	8.4884	9.1472	9.547	10.229	10.614	10.944	11.577	12.063	12.563	12.633	13.259	13.607	14.113	14.633	15.046
0.47361	1.0043	1.5323	2.0951	2.5717	3.0887	3.5421	4.1265	4.5863	5.0202	5.5195	6.0284	6.646	7.0878	7.4745	7.8367	8.4216	9.2887	9.7219	10.214	10.567	10.849	11.544	12.08	12.493	12.774	13.15	13.552	14.056	14.75	14.947
0.48554	0.96328	1.5921	2.0841	2.5717	3.138	3.5498	4.1517	4.5953	5.0678	5.5095	6.082	6.6006	7.1473	7.4868	7.8876	8.3685	9.1472	9.678	10.336	10.459	10.928	11.494	12.012	12.528	13.168	13.168	13.626	14.056	14.516	15.046
0.49979	0.98024	1.5097	2.0841	2.5905	3.138	3.4966	4.1855	4.4795	4.9917	5.4093	6.0284	6.3987	7.2915	7.4132	8.1712	8.4216	9.105	9.6488	10.138	10.536	10.817	11.843	12.148	12.563	12.988	12.988	13.7	14.037	14.75	15.145
0.47361	0.99394	1.5232	2.0841	2.6094	3.0957	3.5269	4.1097	4.6133	4.9917	5.4994	6.0177	6.612	7.1593	7.7231	7.99	8.435	9.1754	9.6196	10.214	10.614	11.056	11.643	12.063	12.511	12.952	12.97	13.756	13.962	14.555	15.125
0.49773	1.0008	1.5277	2.0731	2.6094	3.0747	3.5881	4.068	4.5684	4.9917	5.5297	6.0498	6.5441	7.1354	7.5238	8.0157	8.475	9.1331	9.6196	10.305	10.536	11.04	11.445	12.165	12.511	13.096	13.222	13.533	13.981	14.458	15.006
0.47361	0.98707	1.5187	2.0677	2.5968	3.0747	3.5345	3.9772	4.6313	5.0202	5.4994	6.0498	6.5329	7.2072	7.5733	8.1062	8.4216	9.049	9.6196	10.29	10.521	11.04	11.759	12.114	12.651	12.881	13.204	13.607	13.812	14.516	15.205
0.47755	0.97683	1.5097	2.0567	2.6411	3.1027	3.489	4.1517	4.6403	5.0487	5.4994	6.0177	6.5329	7.1832	7.5485	7.8748	8.5018	9.105	9.7513	10.275	10.598	11.024	11.544	12.2	12.424	12.935	13.368	13.626	14.075	14.613	15.205
0.48957	0.98024	1.5459	2.0458	2.5905	3.0887	3.5269	4.1601	4.6856	5.0582	5.4793	5.9645	6.6917	7.2072	7.6355	7.824	8.3685	9.1331	9.6488	10.214	10.49	10.96	11.478	12.165	12.581	12.828	13.096	13.386	14.113	14.769	15.346
0.48755	0.97683	1.5368	2.0731	2.5034	3.0817	3.5269	4.1097	4.5863	5.0107	5.5095	6.1791	6.646	7.1832	7.7356	7.4254	8.395	9.1331	9.6488	10.123	10.521	10.944	11.494	12.2	12.598	12.97	13.186	13.607	13.887	14.555	15.326
0.48153	0.99394	1.5232	2.0296	2.5842	3.026	3.5345	4.1685	4.5774	5.0297	5.4592	6.0284	6.6006	7.2072	7.5981	7.8621	8.3818	9.2461	9.7219	10.123	10.536	11.088	11.577	12.029	12.546	12.881	13.114	13.277	13.906	14.691	15.306
0.47954	1.0008	1.5368	2.0513	2.6411	3.0399	3.5804	4.1517	4.6043	4.9634	5.4093	5.9433	6.7146	7.1473	7.4745	7.7861	8.4216	9.1613	9.6196	10.138	10.536	10.786	11.527	12.029	12.441	12.988	13.078	13.496	14.019	14.73	15.306
0.49773	1.0147	1.5097	2.0242	2.6858	3.026	3.4739	4.1349	4.6043	4.9823	5.4392	6.0391	6.5893	7.1952	7.5361	8.0286	8.5018	9.105	9.678	10.108	10.474	10.976	11.478	12.063	12.459	12.917	13.114	13.423	14.037	14.652	15.205
0.50393	1.0147	1.5505	2.0786	2.6475	3.026	3.5574	4.1013	4.6856	4.8977	5.4692	5.9116	6.5104	7.2433	7.5114	7.9387	8.5018	9.0211	9.678	10.003	10.521	11.088	11.249	12.08	12.511	12.845	13.168	13.386	14.075	14.73	14.966
0.50393	1.0078	1.5459	2.0786	2.5968	3.0747	3.5117	4.1097	4.6675	4.9445	5.4292	6.0391	6.6233	7.0997	7.5238	8.0028	8.4216	9.049	9.5615	10.078	10.428	11.104	11.659	11.86	12.598	12.935	13.204	13.368	13.924	14.652	15.165
0.5102	1.0147	1.5277	2.0567	2.6602	3.0399	3.5117	4.1601	4.6223	5.0107	5.4093	5.8486	6.4767	7.1593	7.5485	7.9515	8.5018	9.063	9.678	10.063	10.169	11.056	11.693	11.911	12.581	12.845	13.204	13.515	14	14.613	15.346
0.50601	0.96328	1.5052	2.1006	2.673	3.026	3.5117	4.1097	4.6765	5.0012	5.4192	6.0071	6.3213	7.1952	7.6479	8.0415	8.435	8.9794	9.6634	10.048	10.505	10.912	11.626	12.012	12.511	12.935	13.096	13.478	14.132	14.672	15.265
0.50393	1.0182	1.5874	2.1117	2.6157	3.0468	3.5269	4.1181	4.6584	4.879	5.4893	5.88	6.5554	7.1712	7.6604	7.9771	8.4216	8.9655	9.6342	10.078	10.629	11.04	11.494	11.995	12.476	12.792	13.222	13.222	13.849	14.535	15.386
0.49568	0.98024	1.5505	2.1062	2.6987	3.0607	3.3473	4.1685	4.6494	4.9917	5.4592	5.9328	6.646	7.1235	7.6479	8.0028	8.4884	8.9933	9.6342	10.154	10.567	10.992	11.693	11.995	12.424	12.899	13.241	13.332	13.812	14.477	15.326
0.48153	0.98365	1.4873	2.1006	2.673	3.1309	3.4438	4.1855	4.6313	5.0012	5.3894	5.9645	6.6917	7.1116	7.5485	7.8876	8.6364	8.9655	9.7219	10.078	10.536	10.96	11.659	11.944	12.493	12.845	13.168	13.441	13.906	14.419	15.346
0.50393	1.0217	1.5232	2.0951	2.5842	2.9437	3.4966	4.2024	4.7221	4.9728	5.4292	6.0177	6.4767	7.1473	7.5857	8.0415	8.5286	9.0351	9.7513	9.9287	10.397	10.992	11.709	11.894	12.546	12.845	13.024	13.515	14.019	14.439	15.145
0.48755	1.0078	1.5323	2.1117	2.6666	3.0399	3.4513	4.2279	4.6765	4.9634	5.4292	5.9539	6.5667	7.2674	7.5609	8.0544	8.5555	8.9794	9.8397	10.003	10.382	11.363	11.347	12.029	12.389	12.757	12.952	13.496	14.037	14.477	15.245
0.5102	1.0288	1.5368	2.0951	2.6094	3.0607	3.5727	4.2792	4.5863	4.9164	5.5095	5.9328	6.4992	7.2553	7.5733	8.0415	8.4884	9.1613	9.7513	9.9436	10.567	11.168	11.527	11.961	12.251	12.704	13.204	13.515	13.793	14.458	15.245
0.49568	1.0253	1.5052	2.0841	2.5842	3.026	3.5345	4.1685	4.5774	4.8232	5.5297	5.8906	6.5554	7.2312	7.5238	8.4216	8.5152	9.105	9.8102	10.123	10.413	11.072	11.577	12.046	12.355	12.845	13.114	13.222	14	14.439	15.326
0.48353	1.0182	1.5142	2.0731	2.6221	3.0817	3.5269	4.1265	4.5238	4.9445	5.4192	5.9328	6.578	7.2674	7.4254	7.8748	8.5018	9.1754	9.7513	10.033	10.583	11.104	11.527	11.978	12.669	12.739	13.186	13.533	14.189	14.497	15.366
0.49364	1.0043	1.5781	2.0513	2.5592	3.033	3.5269	4.1517	4.5595	4.9634	5.5095	5.88	6.612	7.0997	7.4254	8.0028	8.475	8.9794	9.9138	10.108	10.676	11.024	11.412	12.2	12.616	12.721	12.97	13.332	14.037	14.477	15.285
0.4916	1.0043	1.5414	2.0622	2.578	3.0399	3.5574	4.2279	4.5416	4.8604	5.4692	5.9751	6.6233	7.1116	7.3765	8.0544	8.5152	8.9933	9.7954	10.169	10.567	11.072	11.511	11.978	12.651	12.988	12.899	13.441	13.887	14.613	15.125
0.50186	1.0008	1.4651	2.0786	2.6221	3.0399	3.5041	4.2024	4.5505	4.814	5.4492	6.0712	6.5441	7.0168	7.4868	8.1062	8.4083	8.9516	9.6488	10.305	10.49	10.833	11.593	12.165	12.616	12.774	13.35	13.496	13.774	14.516	15.225
0.49364	1.0147	1.5097	2.0296	2.6602	3.1521	3.5345	4.1265	4.5774	4.8325	5.3794	6.0284	6.4544	7.0878	7.5114	8.1322	8.5152	9.063	9.6342	9.9883	10.428	10.992	11.56	12.165	12.493	12.669	13.35	13.405	13.981	14.439	15.185
0.48755	1.0288	1.5459	2.0188	2.5968	3.0538	3.4814	4.1685	4.5416	4.879	5.4893	6.0605	6.4767	7.0878	7.3522	8.3288	8.3024	9.1331	9.547	10.169	10.413	11.152	11.577	12.182	12.476	12.828	12.757	13.478	13.756	14.828	15.245
0.48353	1.0113	1.5142	2.0242	2.6923	3.0747	3.5041	4.1013	4.5327	4.8697	5.3894	6.0071	6.6233	7.0759	7.4376	7.9643	8.4083	9.1331	9.6488	10.199	10.367	11.008	11.643	12.097	12.493	12.669	12.917	13.533	13.812	14.516	15.105
0.4916	0.96328	1.5232	2.035	2.6347	3.0468	3.5041	4.1181	4.5505	4.8511	5.4093	6.0605	6.4879	7.0404	7.4622	8.0286	8.5152	9.049	9.5615	10.033	10.382	11.056	11.461	12.148	12.476	12.739	13.024	13.386	13.831	14.555	15.185
0.48957	0.9532	1.5368	2.0134	2.6602	2.9779	3.5269	4.1097	4.5774	4.8883	5.3695	6.082	6.5329	7.0997	7.4868	8.0415	8.5018	9.091	9.547	10.199	10.382	11.168	11.494	12.114	12.459	12.721	13.078	13.681	13.943	14.497	15.105
0.49364	0.94652	1.5232	2.0841	2.5654	3.026	3.5574	4.1181	4.5061	4.907	5.4292	6.0498	6.7031	7.0997	7.4009	7.9387	8.4483	8.9655	9.5325	10.138	10.459	11.217	11.643	12.234	12.546	12.935	13.042	13.386	13.849	14.458	15.326
0.49568	0.96666	1.5277	2.0841	2.6094	3.0538	3.5957	4.0846	4.4355	4.9445	5.3894	6.0284	6.646	7.0641	7.5485	7.9259	8.475	8.9101	9.6196	10.154	10.336	11.008	11.593	12.182	12.686	12.828	13.241	13.552	13.831	14.594	15.205
0.49773	0.97343	1.5232	2.0841	2.6411	3.0538	3.5193	4.0266	4.5238	4.954	5.4592	6.0927	6.6574	7.2433	7.4499	8.2104	8.5286	9.0211	9.6342	10.214	10.382	11.12	11.626	12.148	12.828	12.757	13.006	13.295	13.906	14.691	15.046
0.49568	0.97004	1.5323	2.1117	2.6538	3.0887	3.5117	3.9936	4.6223	4.9728	5.3993	6.125	6.6917	7.2553	7.5733	7.9515	8.5689	9.0072	9.091	10.154	10.336	10.707	11.593	12.114	12.651	12.828	13.024	13.441	13.962	14.555	14.907
0.48755	0.97683	1.5368	2.1117	2.4911	3.0122	3.5574	4.0597	4.6043	4.9728	5.3794	6.0927	6.646	7.2072	7.5114	7.8494	8.5018	9.077	9.5036	10.351	10.428	11.088	11.61	12.165	12.616	12.774	13.06	13.589	13.943	14.535	14.947
0.5102	0.96666	1.5232	1.9866	2.6031	3.0191	3.4814	4.1349	4.5774	5.0297	5.3201	6.0284	6.5104	7.0878	7.6105	8.0157	8.5555	8.9655	9.5905	10.443	10.397	11.249	11.494	12.251	12.633	12.935	13.168	13.533	13.962	14.633	14.887
0.49773	0.98365	1.5368	2.1117	2.6602	3.0122	3.4814	4.0597	4.5595	5.0202	5.4592	6.0284	6.5893	7.005	7.4009	7.9003	8.5018	9.049	9.5615	10.382	10.521	11.185	11.659	12.355	12.669	13.024	12.97	13.423	14.113	14.652	14.947
0.49773	0.96666	1.5505	2.1789	2.4363	3.0817	3.5345	4.0597	4.4795	5.0582	5.3993	6.1358	6.5216	7.1116	7.4132	8.395	8.4083	9.0072	9.5325	10.275	10.443	10.944	11.643	12.32	12.546	12.863	13.024	13.386	13.868	14.381	15.125
0.48755	0.95991	1.5828	2.1062	2.6031	2.9166	3.4966	4.093	4.5684	5.0202	5.56	6.0712	6.6574	7.1235	7.4499	8.342	8.542	9.049	9.5905	10.214	10.521	11.008	11.776	12.251	12.581	12.899	13.042	13.681	14.019	14.574	15.185
0.48153	0.97004	1.5323	2.0841	2.6538	3.0538	3.4814	4.0597	4.5774	5.0107	5.5499	6.0712	6.5329	7.1473	7.5114	8.1712	8.5689	8.9933	9.5325	10.29	10.367	10.96	11.379	12.012	12.511	12.81	12.952	13.368	13.793	14.672	15.185
0.49568	0.95991	1.5007	2.0786	2.6157	3.0957	3.4966	4.1181	4.5863	5.0297	5.4793	6.0498	6.7375	7.0997	7.4254	8.0673	8.5018	9.1191	9.4892	10.321	10.474	10.96	11.793	12.114	12.563	12.899	12.97	13.423	13.981	14.691	15.085
0.4916	0.99394	1.5007	2.0731	2.578	2.9847	3.4739	4.1517	4.5863	4.9917	5.5499	6.0498	6.7605	7.1116	7.3644	7.8876	8.6364	8.8824	9.446	10.138	10.49	10.976	11.626	11.961	12.616	12.739	13.114	13.644	14.189	14.672	15.066
0.49773	0.94986	1.5142	2.0677	2.6411	3.0538	3.489	4.0597	4.6043	5.0582	5.5297	6.082	6.612	7.1593	7.4376	8.0932	8.5286	8.7999	9.5325	10.154	10.598	11.104	11.445	11.961	12.581	12.845	12.935	13.552	13.924	14.711	15.066
0.49773	0.96328	1.5052	2.0951	2.6538	3.0538	3.5498	4.0763	4.5863	4.9917	5.5499	6.0712	6.7605	7.1712	7.4009	8.0415	8.4483	8.9377	9.576	10.033	10.536	11.136	11.478	11.961	12.476	12.616	13.132	13.313	13.831	14.75	14.907
0.49979	0.97343	1.5459	2.0677	2.5281	3.138	3.5727	4.0348	4.6675	5.0107	5.5702	6.0712	6.578	7.1952	7.4254	8.0286	8.4483	9.0072	9.6051	10.123	10.567	11.249	11.511	11.927	12.633	12.686	13.241	13.332	13.868	14.828	14.986
0.48353	0.99394	1.5323	2.0786	2.5281	3.0191	3.6035	3.9772	4.6043	4.9917	5.4592	6.1035	6.578	7.2072	7.3765	7.9259	8.5286	8.8824	9.7807	10.169	10.614	11.04	11.626	11.927	12.546	12.828	13.259	13.368	13.7	14.907	15.165
0.4658	1.0008	1.5277	2.0841	2.485	3.1238	3.5041	4.0183	4.6494	5.0582	5.5195	6.1683	6.3987	7.1832	7.3765	7.9259	8.3685	9.0211	9.7219	10.154	10.645	10.912	11.412	11.961	12.459	12.739	13.204	13.423	13.831	14.652	15.105
0.49979	0.97343	1.5368	2.0731	2.6347	3.033	3.5193	4.1097	4.6584	4.9634	5.4994	6.2009	6.6233	7.1116	7.4254	7.9771	8.475	8.8963	9.9436	10.018	10.645	11.072	11.643	11.944	12.598	12.774	13.114	13.533	13.943	14.769	14.966
0.50393	0.97343	1.5368	2.0786	2.5717	3.0817	3.5041	4.1097	4.6675	5.0297	5.4793	6.1358	6.6802	7.2072	7.4254	7.9131	8.435	8.9377	9.7073	10.093	10.536	11.008	11.363	11.81	12.528	12.686	12.899	13.277	13.831	14.73	15.105
0.49773	0.9905	1.5414	2.0513	2.6347	3.0747	3.4739	4.1601	4.5863	4.9917	5.5095	6.0712	6.6006	7.2192	7.4009	8.1322	8.5286	8.9101	9.6342	10.033	10.443	11.088	11.478	11.961	12.441	12.863	13.06	13.386	13.887	14.672	15.386
0.48755	0.97343	1.5187	2.0296	2.7116	3.0747	3.489	4.093	4.6133	5.0297	5.4893	5.9858	6.4432	7.1473	7.34	8.1843	8.475	9.0211	9.6051	10.244	10.645	11.024	11.461	11.894	12.493	12.81	12.952	13.441	13.681	14.652	15.285
0.50186	0.99394	1.5052	2.0404	2.7116	3.0122	3.4814	4.093	4.5953	5.0107	5.3398	5.9328	6.5329	7.1235	7.3765	8.1582	8.475	8.9655	9.576	10.063	10.567	10.833	11.379	11.927	12.355	12.739	12.97	13.386	14.056	14.828	15.285
0.4916	0.96328	1.4873	2.0622	2.6031	3.026	3.5269	4.1013	4.5953	5.1253	5.4893	5.9751	6.6233	7.0878	7.3887	8.0157	8.6229	8.9377	9.6196	10.154	10.629	10.754	11.494	11.86	12.355	12.651	13.024	13.405	14.094	14.691	15.185
0.49568	0.94986	1.5277	2.0513	2.5592	3.0468	3.5041	4.0597	4.5416	5.0297	5.4994	6.0605	6.6233	6.9698	7.4376	7.8876	8.475	8.9239	9.5615	10.169	10.567	11.104	11.544	12.012	12.097	12.651	13.168	13.552	14.056	14.887	14.986
0.50601	0.98024	1.5459	2.1173	2.5343	3.0399	3.4814	4.093	4.5595	4.9445	5.6313	6.0071	6.6233	7.0641	7.4254	8.1062	8.4616	8.8687	9.5036	10.078	10.552	11.008	11.527	12.046	12.511	12.651	13.096	13.386	14.075	14.555	15.026
0.49773	1.0113	1.5735	2.0296	2.5343	3.0468	3.5269	4.1013	4.5863	5.1157	5.5195	6.0712	6.6688	7.1116	7.4254	7.99	8.4216	8.8963	9.576	10.108	10.397	11.056	11.593	12.148	12.546	12.616	12.935	13.46	14.094	14.633	15.205
0.48957	0.99394	1.5414	2.0513	2.5842	3.0468	3.565	4.1517	4.5863	5.0297	5.5297	6.0284	6.7375	7.0404	7.4254	7.99	8.3288	8.8963	9.6051	10.184	10.428	11.152	11.643	12.337	12.616	12.899	12.935	13.607	13.943	14.477	15.225
0.49364	0.9905	1.5551	2.0786	2.6221	3.0468	3.5117	4.1013	4.5774	5.0773	5.56	6.0284	6.612	7.0523	7.4376	8.0028	8.2366	8.8274	9.7366	10.078	10.521	11.152	11.61	12.148	12.563	12.988	13.024	13.478	13.849	14.672	15.346
0.50186	1.0147	1.5414	2.134	2.6094	3.0677	3.4966	4.1265	4.5238	5.0487	5.6517	6.0284	6.5104	7.0168	7.4499	8.0157	8.4616	8.8963	9.6196	10.018	10.536	10.928	11.743	12.182	12.704	12.881	13.078	13.386	14.019	14.574	15.185
0.49364	0.9905	1.5414	2.1676	2.6347	3.026	3.5574	4.1601	4.7221	5.0582	5.56	6.082	6.5329	7.0523	7.4376	7.8748	8.435	8.9377	9.6342	10.018	10.552	10.96	11.314	12.182	12.424	12.935	12.935	13.423	13.943	14.594	15.125
0.4916	1.0113	1.5277	2.0786	2.4667	3.0957	3.5804	4.1265	4.5149	4.9634	5.5803	6.1466	6.5329	6.9933	7.4132	8.0415	8.395	8.65	9.6051	10.214	10.614	11.088	11.396	12.148	12.633	12.899	12.881	13.441	14.037	14.419	15.165
0.50601	1.0043	1.5414	2.0896	2.6411	3.1097	3.5041	4.1181	4.6947	4.9634	5.5297	6.125	6.4879	6.9463	7.5609	7.9771	8.3818	8.8963	9.6342	10.26	10.552	11.104	11.412	12.08	12.511	13.15	13.024	13.681	13.868	14.497	15.066
0.48957	0.9905	1.5368	2.0622	2.5905	3.0399	3.5193	4.1097	4.6313	5.0107	5.6109	6.0712	6.4656	7.0997	7.4745	7.7987	8.2892	8.9239	9.576	10.351	10.583	10.645	11.511	12.234	12.285	12.845	12.97	13.607	13.868	14.458	15.165
0.48353	1.0217	1.5414	2.0951	2.5405	3.0817	3.5269	4.1265	4.6223	4.9823	5.5195	5.9539	6.5667	7.0878	7.4376	7.8114	8.4483	8.8136	9.4892	10.199	10.629	11.168	11.743	12.08	12.476	12.704	13.096	13.589	13.924	14.574	15.085
0.50601	1.0253	1.5643	2.0731	2.5717	3.0468	3.489	4.1013	4.5953	4.9634	5.5803	6.0391	6.4432	7.0997	7.5238	7.9259	8.435	8.9516	9.6196	10.244	10.521	10.865	11.726	12.251	12.546	12.721	13.042	13.626	13.981	14.75	15.185
0.44126	0.99394	1.5232	2.1284	2.6157	3.0122	3.5117	4.1517	4.6043	4.9728	5.5803	6.1358	6.612	7.0404	7.3644	8.0028	8.5689	9.1331	9.5181	10.214	10.443	10.833	11.659	12.32	12.441	12.721	13.15	13.478	13.868	14.73	15.085
0.50601	1.0113	1.5505	2.0677	2.7246	3.0887	3.5269	4.1601	4.5684	4.954	5.5702	5.9964	6.5554	7.0641	7.4991	7.8621	8.4083	8.9794	9.4029	10.459	10.413	11.008	11.676	12.217	12.511	12.792	13.15	13.478	13.756	14.828	15.185
0.47558	0.97683	1.5643	2.0242	2.6923	3.0817	3.5193	4.1433	4.4619	5.0487	5.6517	5.9222	6.6233	7.0523	7.5114	8.1582	8.4216	8.8549	9.4604	10.214	10.382	11.088	11.593	12.046	12.493	12.598	13.06	13.405	13.774	14.439	15.205
0.49979	0.99394	1.5277	2.1284	2.5343	3.0957	3.5269	4.1601	4.5327	4.9823	5.5803	5.9751	6.5667	7.1354	7.4622	8.1712	8.5152	8.9933	9.446	9.9734	10.583	11.024	11.643	12.217	12.528	12.774	13.132	13.332	13.681	14.555	15.225
0.48755	0.97343	1.5277	2.0404	2.7116	3.0677	3.565	4.1601	4.5684	4.9728	5.5499	5.9433	6.4544	7.1116	7.4991	8.0673	8.3685	9.0072	9.5181	10.108	10.583	11.008	11.593	11.843	12.633	12.669	13.259	13.386	13.774	14.555	15.265
0.48554	0.98707	1.5232	2.1173	2.6284	3.0538	3.5345	4.1517	4.5149	5.0487	5.5195	5.9858	6.6347	7.1832	7.3887	8.0803	8.5152	9.063	9.4748	10.138	10.598	10.992	11.978	11.978	12.406	12.598	13.132	13.423	13.887	14.477	15.366
0.52079	1.0008	1.5368	2.1062	2.673	3.0677	3.5269	4.093	4.7221	4.9445	5.5297	5.9433	6.5216	7.1832	7.4254	8.0028	8.4216	9.1191	9.5181	10.138	10.676	11.282	11.56	11.894	12.424	12.511	13.114	13.332	13.831	14.789	15.205
0.48755	0.99394	1.5597	2.0677	2.4728	3.033	3.4214	4.093	4.6494	4.9634	5.56	5.9433	6.7146	7.1832	7.4868	7.8494	8.5018	9.077	9.3171	10.199	10.676	11.12	11.81	12.063	12.32	12.616	13.168	13.35	13.868	14.419	15.205
0.48353	0.99739	1.5459	2.0567	2.6221	3.0607	3.3546	4.1013	4.5953	4.9445	5.6825	6.0284	6.6233	7.1473	7.4376	7.99	8.5689	9.1331	9.6342	10.26	10.598	11.168	11.33	12.029	12.476	12.774	13.096	13.332	13.943	14.535	15.265
0.46969	1.0253	1.5277	2.0567	2.5467	3.026	3.5269	4.1517	4.5863	4.9634	5.5095	5.9858	6.4879	7.2312	7.3887	8.1192	8.5018	9.0351	9.4748	10.244	10.536	10.992	11.527	12.046	12.581	12.616	13.042	13.332	13.962	14.362	15.285
0.50186	1.0147	1.5323	2.0622	2.6411	3.0468	3.5727	4.2024	4.6133	4.9258	5.5195	5.9539	6.6802	7.2192	7.34	7.8621	8.5152	9.091	9.4604	10.244	10.567	10.992	11.217	12.148	12.355	12.633	13.024	13.405	14.037	14.691	15.245
0.49773	0.9905	1.5414	2.0841	2.5281	3.033	3.6035	4.1349	4.5595	5.0965	5.4392	5.8591	6.5667	7.34	7.4868	8.0157	8.5689	9.0211	9.6342	10.29	10.521	11.008	11.347	12.08	12.546	12.616	13.186	13.441	13.924	14.672	14.887
0.48957	0.99394	1.5828	2.0458	2.4973	3.0538	3.5498	4.2024	4.5684	4.9164	5.4994	5.9858	6.6233	7.2915	7.4254	8.1322	8.5286	9.105	9.446	10.275	10.567	11.024	11.494	12.114	12.493	12.774	13.096	13.496	14.113	14.555	15.285
0.4916	1.0113	1.5874	2.0458	2.6987	3.138	3.4966	4.1601	4.5774	4.9352	5.5095	6.0177	6.646	7.3037	7.4009	8.1322	8.5152	9.0211	9.7807	10.29	10.474	11.136	11.693	12.08	12.528	12.863	12.97	13.368	14.132	14.574	14.947
0.49568	0.9905	1.5277	2.0786	2.5343	3.1027	3.4289	4.1013	4.5863	4.8697	5.4793	5.9222	6.5329	7.1952	7.4132	8.1712	8.5689	9.077	9.5181	10.214	10.707	11.024	11.626	12.234	12.563	13.042	13.078	13.515	14.037	14.555	15.185
0.49773	0.99394	1.5097	2.0622	2.6794	3.0191	3.5421	4.0846	4.5953	4.9164	5.5398	5.9116	6.5667	7.2192	7.5857	8.1712	8.4616	9.049	9.5615	10.336	10.474	10.928	11.743	12.114	12.581	12.792	13.06	13.423	14.037	14.323	15.125
0.4916	1.0043	1.5828	2.0731	2.4667	3.1592	3.5041	4.0597	4.5595	4.954	5.4392	5.9328	6.5667	7.1952	7.6355	8.0286	8.475	8.9933	9.5905	10.321	10.397	10.865	11.643	12.114	12.581	12.935	13.078	13.607	14.151	14.439	15.145
0.48755	0.99394	1.5052	2.0951	2.6794	3.0677	3.5804	4.068	4.5505	4.7771	5.3894	5.9433	6.6688	7.1235	7.4991	8.1712	8.3685	8.9101	9.547	10.244	10.552	10.865	11.726	11.961	12.441	12.739	13.078	13.332	13.981	14.477	14.947
0.4916	0.9905	1.5052	2.0242	2.4911	3.1097	3.6266	4.1097	4.5238	4.879	5.4093	5.9539	6.3987	7.1354	7.5733	8.0932	8.4884	8.8411	9.5905	10.123	10.536	11.072	11.709	12.251	12.598	12.757	13.06	13.423	13.831	14.516	14.633
0.49364	1.0147	1.5368	2.0622	2.6411	3.1027	3.4966	4.1433	4.5416	4.9352	5.6007	5.9011	6.5441	7.1593	7.4499	8.0028	8.4616	8.9516	9.547	10.29	10.614	11.04	11.693	12.097	12.493	12.81	13.096	13.57	14.056	14.828	15.548
0.50186	1.0043	1.5597	2.0622	2.4667	3.0607	3.5041	4.0763	4.5327	4.8883	5.5297	6.0284	6.5667	7.1354	7.5981	8.1974	8.4083	8.8824	9.6488	10.199	10.645	10.912	11.626	12.148	12.633	12.881	13.114	13.368	13.849	14.691	15.326
0.48957	0.9905	1.5323	2.0896	2.5592	3.026	3.5421	4.1265	4.7221	4.9445	5.4994	5.9858	6.5893	7.1473	7.5238	8.0157	8.3818	8.9101	9.766	10.018	10.629	10.912	11.61	12.08	12.651	12.81	12.917	13.533	13.981	14.555	15.066
0.48957	0.99394	1.5052	2.0296	2.6666	3.026	3.5421	4.1265	4.6494	4.8883	5.4592	5.9858	6.4098	7.1832	7.6729	8.2104	8.4884	8.8963	9.7366	10.26	10.567	11.088	11.676	11.927	12.721	12.845	13.006	13.368	13.943	14.789	14.848
0.49568	1.0008	1.4917	2.0951	2.4667	2.9985	3.5345	4.1265	4.6584	4.9164	5.56	6.0177	6.5667	7.0523	7.6479	8.1062	8.5018	8.9794	9.7219	10.214	10.692	11.056	11.709	12.08	12.046	12.81	12.952	13.024	14.056	14.75	14.907
0.48957	0.98365	1.6061	2.0951	2.6923	3.0468	3.5117	4.2024	4.713	4.8511	5.5499	6.0071	6.578	7.1952	7.5485	8.0028	8.475	8.9794	9.6488	9.8249	10.598	10.96	11.843	12.131	12.633	12.863	12.988	13.332	14.037	14.4	15.105
0.48957	1.0008	1.5187	2.0242	2.7116	3.0399	3.5574	4.177	4.6313	4.9258	5.56	5.9645	6.6574	7.2312	7.3765	8.1582	8.395	8.9794	9.547	10.397	10.521	10.96	11.643	11.995	12.651	12.97	12.917	13.35	13.924	14.381	15.145
0.4916	0.9905	1.5414	2.0677	2.6221	3.0538	3.4966	4.1517	4.7221	4.954	5.5803	6.0391	6.6917	7.0878	7.5609	8.0415	8.435	9.063	9.6342	10.382	10.583	11.249	11.659	12.08	12.563	12.935	12.917	13.943	14.056	14.439	14.907
0.49979	0.98365	1.5232	2.0567	2.5717	3.0468	3.4513	4.1181	4.5953	4.9917	5.4893	6.0712	6.6006	7.0997	7.4991	8.0932	8.4483	9.0211	9.678	10.29	10.583	10.944	11.676	12.337	12.616	12.739	12.988	13.277	13.868	14.555	15.066
0.50186	0.95991	1.5232	2.0622	2.5034	3.0817	3.5041	4.1265	4.6675	5.0012	5.4793	6.082	6.578	7.1593	7.4868	8.0544	8.4616	9.1331	9.5325	10.244	10.645	10.754	11.726	12.012	12.546	12.792	13.024	13.441	13.981	14.594	15.205
0.50601	1.0008	1.5097	2.0296	2.578	3.026	3.5269	4.1097	4.5238	4.9445	5.4392	6.1035	6.5893	7.2553	7.5361	8.1192	8.5152	9.2177	9.5905	10.154	10.598	10.976	11.626	12.32	12.511	12.774	12.81	13.737	14	14.419	15.125
0.50186	1.0394	1.5097	2.0731	2.553	3.0191	3.5498	4.1601	4.5863	4.9634	5.4292	6.3765	6.578	7.1832	7.4499	8.0803	8.5959	9.2602	9.4892	10.244	10.552	11.217	11.709	12.063	12.476	12.952	12.828	13.57	13.887	14.516	15.205
0.48153	0.9905	1.5232	2.0513	2.7052	2.971	3.5193	4.1265	4.5953	4.907	5.4893	6.0498	6.578	7.2072	7.3887	7.9515	8.5555	9.2036	9.6196	10.29	10.521	10.817	11.527	11.995	12.493	12.863	12.81	13.496	13.981	14.633	15.046
0.50186	1.0572	1.5097	2.0458	2.5905	3.0538	3.4814	4.093	4.6133	4.9445	5.4994	6.0712	6.5554	7.1712	7.3887	7.9643	8.7179	9.2036	9.6051	10.26	10.645	10.944	11.56	11.944	12.598	12.757	12.828	13.515	13.981	14.594	15.006
0.51441	0.9905	1.5368	2.1173	2.6157	3.0538	3.5193	4.1349	4.6403	5.0012	5.5297	5.9539	6.612	7.0404	7.4499	8.0544	8.5555	9.2602	9.6051	10.229	10.583	10.992	11.461	12.08	12.476	12.686	12.935	13.626	13.924	14.555	15.066
0.50186	0.99739	1.4962	2.0896	2.5158	3.0399	3.5117	4.2024	4.5595	5.0202	5.5499	6.1035	6.6688	7.1116	7.4868	7.9131	8.5555	9.105	9.5905	10.305	10.629	10.96	11.461	12.165	12.355	12.704	12.917	13.552	14.132	14.927	15.185
0.48153	0.98365	1.5097	2.0896	2.5281	3.0957	3.4664	4.1181	4.5774	4.9445	5.4292	5.88	6.5329	7.1235	7.4868	7.9771	8.65	9.1191	9.6488	10.214	10.552	10.976	11.445	12.029	12.581	12.917	12.952	13.295	13.868	14.458	15.225
0.49979	1.0147	1.5277	2.0513	2.6475	3.0399	3.4966	4.1265	4.5953	4.9634	5.3993	6.0391	6.5667	7.2674	7.4376	8.1322	8.6229	9.0072	9.6488	10.229	10.614	11.056	11.544	12.165	12.528	12.863	12.988	13.496	13.943	14.574	15.145
0.50186	1.0043	1.5277	2.0622	2.6031	3.0677	3.5269	4.177	4.6043	5.0107	5.5095	5.9751	6.5554	7.2072	7.3644	7.7608	8.5152	9.0211	9.678	10.336	10.552	10.992	11.217	12.08	12.563	12.686	13.06	13.496	13.924	14.574	15.185
0.4916	1.0008	1.5414	2.0677	2.6538	3.0677	3.4966	4.2535	4.6223	5.0678	5.5398	6.0177	6.5441	7.1116	7.3279	8.0544	8.5555	9.049	9.6196	10.26	10.459	11.152	11.793	12.029	12.528	12.935	12.881	13.478	13.906	14.362	15.306
0.49364	0.98365	1.5232	2.0242	2.5717	3.0607	3.5421	4.1939	4.5684	4.9728	5.4793	6.1142	6.5329	7.1235	7.4254	8.0932	8.5286	9.049	9.5615	10.275	10.583	11.088	11.843	12.182	12.528	12.686	12.952	13.607	13.962	14.342	15.245
0.49773	0.9905	1.5232	2.0404	2.5842	3.0538	3.4739	4.2109	4.6043	4.9823	5.4692	6.0177	6.4879	7.0168	7.3644	7.9771	8.4083	9.091	9.6488	10.184	10.505	10.992	11.577	12.2	12.546	12.935	12.952	13.607	13.906	14.323	15.265
0.48755	0.98024	1.5277	2.0513	2.5905	3.0747	3.5574	4.2279	4.5327	4.954	5.5297	5.9222	6.5554	7.1593	7.3279	8.0286	8.4083	9.105	9.678	10.063	10.521	10.786	11.494	12.097	12.581	12.845	12.952	13.46	14	14.4	15.145
0.49979	1.0008	1.5505	2.0677	2.5968	3.0538	3.5041	4.1685	4.5595	4.9728	5.5195	5.9964	6.4321	7.1354	7.4009	7.8876	8.3552	9.091	9.6488	10.093	10.739	10.897	11.56	12.012	12.511	12.669	13.114	13.552	13.962	14.633	14.966
0.50601	1.0113	1.5187	2.0622	2.5467	3.0677	3.565	4.1601	4.6043	4.9728	5.5195	5.9964	6.4321	7.1235	7.4376	8.0673	8.4083	9.0351	9.6196	10.063	10.614	10.96	11.494	12.114	12.528	12.81	13.222	13.441	13.962	14.672	15.265
0.49773	1.0394	1.5323	2.1173	2.5343	3.0887	3.565	4.1265	4.6856	5.0392	5.5195	6.1358	6.4879	7.1832	7.4991	7.9515	8.4483	9.0072	9.6634	10.093	10.567	11.168	11.643	12.2	12.493	12.581	13.15	13.533	14.037	14.535	15.165
0.47558	1.0394	1.5187	2.1117	2.7246	3.033	3.5345	4.1433	4.6313	5.0392	5.4592	5.9964	6.5667	7.2312	7.4009	8.0803	8.3552	9.105	9.766	10.018	10.552	11.024	11.445	12.165	12.441	12.581	13.204	13.46	13.887	14.439	15.285
0.48153	1.0113	1.5323	2.035	2.6666	3.0399	3.5957	4.1097	4.6765	4.9917	5.4793	5.9751	6.5893	7.2553	7.4622	8.0415	8.3156	9.1191	9.7073	10.018	10.614	11.04	11.412	12.165	12.459	12.757	13.078	13.57	13.924	14.516	15.165
0.49979	0.99394	1.4962	2.0677	2.6284	3.0607	3.5041	4.1265	4.6403	4.9917	5.4492	5.9858	6.6233	7.1952	7.4376	8.0932	8.4216	9.0351	9.576	10.063	10.707	11.12	11.676	12.2	12.406	12.581	13.168	13.607	14.056	14.497	15.386
0.50186	0.99394	1.5097	2.0622	2.6475	2.9916	3.6035	4.1349	4.6675	5.0487	5.4692	5.9964	6.5329	7.1712	7.4009	8.0803	8.4483	9.0072	9.5615	10.154	10.474	11.104	11.428	12.097	12.337	12.845	13.241	13.57	13.924	14.419	15.386
0.51653	1.0217	1.5689	2.035	2.6602	3.0538	3.489	4.1097	4.6765	5.0107	5.4592	6.0071	6.4321	7.2072	7.4009	8.0544	8.395	8.9377	9.6342	10.093	10.707	11.136	11.659	12.08	12.182	12.792	13.204	13.441	13.793	14.323	15.447
0.50393	0.99394	1.5459	2.0296	2.5717	3.0538	3.5041	4.2024	4.6584	5.0107	5.4692	6.0605	6.4879	7.1116	7.4132	7.9643	8.435	8.9516	9.6488	10.199	10.552	11.152	11.544	11.944	12.217	12.899	13.042	13.368	14.285	14.535	15.346
0.50186	0.9905	1.5232	2.0567	2.5343	3.033	3.5041	4.1349	4.6494	5.0012	5.4994	5.9751	6.4544	7.2553	7.3765	8.0415	8.435	9.0211	9.6926	10.199	10.443	11.152	11.626	12.2	12.012	12.739	13.024	13.259	13.962	14.477	15.185
0.49979	0.99394	1.5007	2.0896	2.553	3.0957	3.5041	4.1601	4.6494	5.0297	5.4994	6.0391	6.4321	7.1952	7.5857	8.0415	8.395	8.9377	9.6196	10.184	10.521	11.056	11.776	12.063	12.268	12.651	13.06	13.35	13.981	14.381	15.245
0.49979	0.97683	1.5505	2.0677	2.6284	3.0677	3.5041	4.1433	4.6584	4.954	5.5195	6.0284	6.4992	7.1712	7.4499	7.9771	8.3818	8.9377	9.6488	10.305	10.629	11.136	11.709	12.097	12.424	12.774	12.863	13.552	13.756	14.4	15.366
0.49979	0.98365	1.5459	2.0513	2.5905	3.0677	3.5117	4.2194	4.7221	4.9258	5.5095	5.9751	6.5329	7.2433	7.6105	7.9131	8.4216	8.9933	9.6488	10.336	10.474	11.024	11.826	12.165	12.476	12.739	13.006	13.57	13.943	14.458	15.326
0.48957	0.98707	1.4962	2.0896	2.5905	3.0538	3.4966	4.068	4.7312	4.8977	5.5095	6.0927	6.4656	7.1354	7.5857	8.0673	8.4616	8.9933	9.678	10.413	10.598	11.152	11.676	12.165	12.424	12.81	12.917	13.57	13.981	14.381	15.265
0.48957	0.98365	1.5505	2.0677	2.6157	3.0817	3.5498	4.0431	4.6403	4.879	5.5297	5.9964	6.5554	7.2553	7.5733	8.1582	8.4884	8.8963	9.7073	10.428	10.676	11.185	11.776	12.2	12.337	12.917	12.952	13.405	14.075	14.555	15.285
0.49773	0.99394	1.5368	2.0513	2.6538	3.0191	3.5957	4.093	4.5774	4.954	5.5195	5.9539	6.5893	7.1354	7.7608	8.0803	8.5824	8.9655	9.7366	10.397	10.552	10.928	11.56	12.148	12.441	12.616	13.06	13.756	14.189	14.516	15.245
0.48957	0.98024	1.5323	2.0458	2.6031	3.0468	3.5957	4.0514	4.5595	4.8883	5.5398	5.9116	6.6574	7.1473	7.4499	8.0157	8.5152	8.9101	9.8841	10.351	10.459	11.056	11.693	12.217	12.511	12.757	13.313	13.478	14.075	14.672	15.245
0.48554	0.98707	1.5323	1.9973	2.5968	3.0538	3.5421	4.0846	4.5595	4.8604	5.5095	5.9011	6.726	7.1354	7.5981	8.0157	8.4616	8.7999	9.6634	10.413	10.583	11.12	11.478	12.2	12.528	12.669	13.186	13.607	14	14.633	15.006
0.48554	0.96328	1.5187	2.0134	2.6031	2.9985	3.6112	4.0597	4.5595	4.8418	5.4492	5.9858	6.7951	7.2192	7.5238	8.0286	8.5959	9.0072	9.7366	10.29	10.629	10.802	11.56	12.097	12.528	12.774	13.006	13.533	14.056	14.672	15.285
0.46774	0.98024	1.5052	2.0567	2.6411	2.9847	3.5345	4.0846	4.4531	4.8325	5.4893	6.0071	6.7375	7.1593	7.4745	7.9515	8.6229	8.9101	9.6634	10.214	10.645	10.786	11.56	12.165	12.774	12.757	13.078	13.386	14.056	14.789	15.145
0.46969	0.99739	1.5097	2.0731	2.5842	3.0817	3.5881	4.068	4.5505	4.8511	5.4692	5.9858	6.7146	7.2072	7.4868	8.2104	8.5555	9.1191	9.678	10.382	10.49	10.96	11.577	12.097	12.459	12.598	12.952	13.295	14.019	14.848	15.265
0.46195	1.0217	1.5414	2.0458	2.6538	3.033	3.4814	4.1181	4.6043	4.8418	5.662	6.0712	6.6688	7.1952	7.4499	7.9643	8.5689	9.1613	9.678	10.351	10.505	10.96	11.494	11.995	12.493	13.078	13.006	13.515	14.132	14.691	15.105
0.48153	0.97343	1.5142	2.0622	2.5842	3.026	3.4664	4.1013	4.5684	4.8697	5.5297	5.9645	6.5329	7.1712	7.4376	7.9771	8.5824	8.9794	9.5325	10.305	10.459	11.088	11.544	12.165	12.563	12.633	13.042	13.368	14.285	14.633	15.026
0.47558	0.95991	1.5187	2.0841	2.5905	3.1521	3.5269	4.1601	4.5863	4.8883	5.5702	6.0177	6.6006	7.2312	7.34	7.8876	8.6229	8.8549	9.6051	10.351	10.505	11.12	11.56	11.978	12.616	12.633	13.204	13.496	14.247	14.711	14.947
0.50601	0.99394	1.4695	2.0786	2.578	3.0191	3.4966	4.1433	4.5595	4.907	5.5095	5.8906	6.5441	7.1354	7.3887	7.9643	8.7999	9.063	9.5615	10.214	10.443	11.104	11.445	11.995	12.528	12.669	13.241	13.441	14.323	14.652	15.145
0.48957	0.94986	1.5187	2.0622	2.6475	3.026	3.5269	4.1601	4.5238	4.8697	5.5195	6.1791	6.5329	7.2312	7.623	7.9003	8.5689	9.1191	9.5615	10.214	10.505	11.152	11.478	11.995	12.476	12.881	13.15	13.423	14	14.947	15.185
0.52079	0.97343	1.4962	2.0841	2.9916	3.0468	3.565	4.1855	4.5953	4.907	5.56	6.0605	6.4879	7.1593	7.4745	7.8621	8.5018	9.077	9.5325	10.428	10.521	11.008	11.428	11.961	12.424	12.739	13.186	13.423	14.037	14.652	15.185
0.4916	0.96666	1.5232	2.0567	2.5905	3.0677	3.5269	4.1433	4.5505	4.9164	5.5905	5.9964	6.4767	7.1593	7.4009	7.8876	8.5824	9.1331	9.6196	10.26	10.521	10.992	11.577	11.995	12.32	12.372	12.863	13.478	14.094	14.594	15.285
0.48957	0.95656	1.5142	2.0731	2.6923	2.9916	3.5193	4.1013	4.4795	4.9445	5.5297	6.0177	6.4992	7.0641	7.5238	8.0028	8.542	9.091	9.7366	10.367	10.413	10.881	11.33	12.08	12.406	12.633	13.114	13.46	14.132	14.594	15.125
0.48957	0.97004	1.5187	2.0622	2.5968	3.0468	3.5498	4.1939	4.5863	4.9728	5.5905	6.0498	6.4879	7.1235	7.5114	7.9515	8.395	9.091	9.6051	10.305	10.536	11.201	11.347	12.165	12.355	12.828	13.259	13.386	14	14.439	15.225
0.48755	0.95991	1.5277	2.1117	2.6347	3.033	3.6035	4.1855	4.6584	4.9258	5.6723	5.9858	6.4656	7.3765	7.5485	8.0415	8.3818	9.049	9.547	10.29	10.723	10.77	11.643	12.097	12.459	12.739	13.024	13.35	13.887	14.477	15.285
0.49364	0.9432	1.4962	2.1284	2.6538	3.0887	3.6499	4.0846	4.6313	4.8977	5.4994	5.9858	6.3987	7.1235	7.5981	8.0415	8.5824	9.063	9.4316	10.184	10.692	10.754	11.347	12.046	12.372	12.881	12.757	13.35	13.924	14.555	15.346
0.49364	0.98024	1.5232	2.1062	2.5905	3.026	3.6189	4.1601	4.6403	4.8977	5.5803	5.9539	6.3876	7.1832	7.4745	8.0544	8.6094	8.9377	9.3599	10.184	10.707	11.12	11.544	12.063	12.424	12.721	13.096	13.241	13.868	14.497	15.366
0.48353	0.97343	1.5097	2.1006	2.5281	3.0538	3.5117	4.2279	4.5863	4.9258	5.4592	5.9645	6.4767	7.1593	7.5485	8.0286	8.1322	9.2319	9.5181	10.154	10.661	10.992	11.527	12.012	12.389	12.828	12.899	13.277	13.868	14.574	15.306
0.51441	0.99739	1.5459	2.0786	2.5842	3.0122	3.5957	4.1939	4.6584	4.954	5.5398	5.9539	6.4656	7.1235	7.4868	7.7735	8.4216	9.1613	9.5615	10.138	10.661	11.04	11.478	12.131	12.372	12.757	13.096	13.15	13.962	14.652	14.966
0.52079	0.97343	1.5323	2.1006	2.5905	3.026	3.5804	4.1855	4.6043	4.9634	5.4793	6.0284	6.4321	7.1116	7.5238	7.7735	8.3288	9.063	9.547	10.154	10.598	11.152	11.726	12.08	12.251	12.792	13.096	13.204	13.962	14.613	14.887
0.4916	1.0043	1.5277	2.0951	2.6221	3.026	3.5574	4.1939	4.5416	4.9445	5.5195	6.0498	6.4544	7.1354	7.5733	7.9003	8.475	9.1472	9.5036	10.138	10.567	11.152	11.56	12.148	12.459	12.739	13.186	13.423	13.943	14.613	15.185
0.4916	0.97683	1.5277	2.1173	2.5842	3.0677	3.5498	4.1433	4.5863	4.9445	5.4692	6.0071	6.5329	7.0641	7.5485	7.7987	8.4483	9.077	9.547	10.169	10.614	11.056	11.478	11.995	12.493	12.792	13.042	13.277	13.887	14.633	14.887
0.48755	0.98707	1.5323	2.0841	2.5905	3.0887	3.5269	4.1685	4.5684	4.6313	5.6723	6.1035	6.6574	6.9815	7.4991	7.9131	8.5689	9.077	9.4892	10.078	10.614	10.992	11.61	11.843	12.32	12.881	13.042	13.186	13.906	14.769	15.125
0.4916	0.99394	1.5323	2.0841	2.578	3.0747	3.4589	4.1601	4.5416	5.0012	5.4592	5.9964	6.5554	6.9346	7.5238	7.8367	8.4483	9.105	9.5615	10.018	10.661	11.008	11.676	11.877	12.285	12.899	12.845	13.478	13.849	14.711	14.907
0.47954	0.98707	1.5505	2.0622	2.6157	3.1521	3.4065	4.1265	4.4883	4.8511	5.5398	6.125	6.5554	6.9463	7.5609	7.8748	8.3685	8.8963	9.5036	10.078	10.614	11.088	11.676	11.995	12.372	12.952	12.97	13.313	14.019	14.613	15.105
0.49773	0.98365	1.4739	2.0786	2.6031	3.0747	3.4739	4.1433	4.4707	5.0012	5.4893	6.0605	6.5329	7.0168	7.5485	7.8621	8.4483	9.091	9.5905	10.078	10.598	11.233	11.61	11.894	12.424	12.828	13.042	13.277	14.037	14.769	15.185
0.47954	0.98707	1.5007	2.0622	2.6666	3.1877	3.4966	4.1181	4.5595	5.0297	5.4492	6.0498	6.5554	7.0759	7.5238	7.7861	8.5018	9.0351	9.7073	10.154	10.567	11.024	11.577	11.995	12.493	12.81	13.15	13.386	14.037	14.691	15.225
0.4916	1.0078	1.5187	2.1117	2.6221	3.0191	3.5421	4.093	4.5505	4.8697	5.4994	6.082	6.5329	7.1952	7.5361	7.7231	8.5286	9.0211	9.6196	10.275	10.583	10.992	11.577	12.063	12.424	12.845	13.132	13.386	13.868	14.594	15.285
0.48755	0.98707	1.5142	2.0622	2.6094	3.0538	3.5117	4.1939	4.5505	4.907	5.5398	6.0284	6.5554	7.1473	7.5361	7.8367	8.5286	9.2177	9.576	10.351	10.397	10.881	11.494	12.148	12.493	12.774	13.042	13.478	13.793	14.672	15.125
0.48755	0.97683	1.4962	2.0841	2.6284	3.0817	3.5804	4.2364	4.6133	4.9634	5.6007	6.0712	6.4879	7.2433	7.5361	7.8621	8.5824	9.091	9.7073	10.169	10.443	10.976	11.461	12.08	12.406	12.633	12.988	13.441	13.849	14.613	15.125
0.48755	1.0253	1.5097	2.1062	2.5968	3.1097	3.5041	4.1517	4.5953	4.9352	5.56	6.0391	6.4544	7.2553	7.5238	7.8876	8.2629	8.9933	9.6488	10.093	10.443	11.04	11.445	12.063	12.337	12.669	13.006	13.626	13.849	14.73	15.105
0.48353	1.0253	1.5277	2.0567	2.6284	3.0122	3.4739	4.1601	4.5684	4.9728	5.56	6.1791	6.6802	7.3522	7.4622	7.9003	8.6229	9.0351	9.6342	10.397	10.443	11.04	11.412	11.995	12.389	12.598	12.935	13.496	13.849	14.789	15.145
0.45812	0.99394	1.5505	2.0404	2.6284	3.0677	3.5117	4.177	4.5863	5.0582	5.5499	6.0927	6.5216	7.3644	7.4991	7.9515	8.5286	9.091	9.5905	10.29	10.459	10.912	11.412	12.029	12.268	12.633	13.35	13.681	13.849	14.769	15.165
0.48957	0.99739	1.5459	2.0951	2.6094	3.1027	3.5727	4.1685	4.6313	4.9728	5.4994	6.082	6.4992	7.3037	7.4376	7.9387	8.5018	9.049	9.6488	10.063	10.443	11.024	11.396	12.012	12.616	12.774	13.132	13.737	13.887	14.613	15.185
0.47954	1.0008	1.5187	2.0296	2.6347	2.9985	3.565	4.1601	4.5774	5.0582	5.5297	6.1358	6.5441	7.2674	7.5485	7.9131	8.2629	9.077	9.5036	10.063	10.443	11.249	11.461	11.894	12.424	12.739	12.234	13.681	13.924	14.691	14.986
0.49568	1.0429	1.5781	2.0896	2.5717	3.0887	3.5957	4.1601	4.6043	4.9634	5.5398	6.0712	6.4321	7.2553	7.5361	7.99	8.5152	9.0351	10.048	10.078	10.397	10.976	11.527	12.012	12.563	12.739	13.042	13.607	13.924	14.477	15.245
0.51653	0.98365	1.5828	2.0513	2.5467	3.0122	3.5345	4.1181	4.6223	4.9917	5.5195	6.0177	6.578	7.3765	7.5361	8.0157	8.4616	9.0351	9.6926	10.184	10.413	11.088	11.461	11.86	12.476	12.774	12.952	13.478	13.943	14.497	15.205
0.48755	0.97343	1.5505	2.0622	2.5405	3.0817	3.5193	4.1097	4.5238	4.9164	5.3497	6.0071	6.5554	7.3522	7.4991	7.9515	8.6364	9.049	9.5905	10.108	10.275	11.072	11.461	11.978	12.704	12.792	13.06	13.57	13.962	14.848	15.326
0.50186	1.0043	1.5459	2.0677	2.5717	3.1097	3.5574	4.1349	4.6494	4.907	5.6517	5.9328	6.4656	7.34	7.4991	8.0028	8.6635	9.0211	9.446	10.244	10.397	11.201	11.511	11.894	12.389	12.845	13.042	13.644	13.793	14.633	15.285
0.48755	1.0113	1.5459	2.0188	2.5905	3.0468	3.5498	4.1349	4.6133	5.0012	5.6313	5.9328	6.6347	7.3279	7.5361	8.0028	8.5959	9.0351	9.7513	10.184	10.382	11.008	11.12	11.961	12.493	13.078	13.186	13.663	13.7	14.323	15.508
0.49568	0.9905	1.5643	2.0513	2.6094	3.0468	3.5193	4.0763	4.6675	5.0202	5.6723	5.8906	6.4992	7.3644	7.6355	8.0415	8.5555	9.1754	9.6488	10.154	10.305	10.912	11.544	11.927	12.511	12.935	13.024	13.607	13.887	14.535	15.508
0.49773	1.0043	1.5597	2.0404	2.5905	3.0538	3.5498	4.1517	4.6223	5.0392	5.6211	5.9222	6.5104	7.34	7.4991	8.0932	8.542	9.105	9.678	10.093	10.305	10.881	11.61	12.029	12.651	12.881	13.06	13.533	13.849	14.439	15.165
0.49364	0.99739	1.5551	2.0677	2.553	3.0607	3.5881	4.1685	4.5684	5.0678	5.6007	5.8591	6.578	7.3644	7.3158	8.2892	8.5689	9.1331	9.678	10.093	10.413	10.833	11.676	11.927	12.651	12.828	12.97	13.441	13.906	14.516	15.125
0.49773	1.0572	1.5414	2.1117	2.5467	3.0887	3.5881	4.0846	4.7312	5.0107	5.662	5.9328	6.5667	7.3765	7.5238	8.0544	8.5018	8.9794	9.6488	10.048	10.413	10.849	11.61	12.046	12.441	12.792	12.863	13.533	13.774	14.419	15.125
0.48153	0.99739	1.5505	2.1173	2.6347	3.0747	3.6112	4.0846	4.6675	5.0012	5.6313	5.9858	6.4992	7.2915	7.34	8.0028	8.6907	9.0072	9.7366	10.123	10.474	10.944	11.577	12.012	12.633	12.704	13.15	13.496	13.924	14.4	15.225
0.49568	0.97683	1.5097	2.0951	2.6411	3.0887	3.5269	4.0018	4.6313	4.9823	5.6313	6.082	6.5216	7.2553	7.4376	8.0803	8.65	9.105	9.766	10.154	10.474	11.136	11.626	12.08	12.493	12.863	13.078	13.626	13.868	14.75	15.085
0.47954	0.97004	1.5187	2.0677	2.6284	3.1238	3.4966	4.2964	4.5863	4.9352	5.5905	6.082	6.6347	7.2433	7.5238	8.0673	8.5824	9.1613	9.6634	10.154	10.351	10.96	11.577	12.012	12.459	12.792	13.078	13.793	13.924	14.613	15.085
0.49773	1.0008	1.5232	1.9919	2.5968	3.0468	3.5117	4.2024	4.5863	4.9728	5.6007	6.1142	6.6233	7.2674	7.4254	7.8494	8.4616	8.9377	9.5325	10.123	10.367	11.136	11.643	12.148	12.424	12.863	13.132	13.57	13.906	14.73	15.145
0.48957	0.99394	1.5414	2.0513	2.6157	3.0122	3.5269	4.1013	4.6043	4.9445	5.4893	6.0927	6.578	7.2192	7.4499	8.0803	8.5555	9.0351	9.6926	10.29	10.428	11.04	11.643	11.995	12.493	12.757	13.222	13.589	13.962	14.672	15.105
0.49364	0.96666	1.5368	2.0841	2.6221	3.033	3.4966	4.1939	4.6584	4.9445	5.6415	6.0284	6.6006	7.2192	7.3522	8.1582	8.6094	9.091	9.6926	10.199	10.459	10.992	11.693	12.389	12.686	12.598	13.132	13.552	13.981	14.868	15.046
0.49568	1.0182	1.5277	2.0513	2.6221	2.9985	3.489	4.1097	4.6043	4.8697	5.5195	6.0498	6.6233	7.1712	7.5485	8.0286	8.6635	8.9933	9.7219	10.26	10.382	10.77	11.527	12.217	12.616	12.704	13.06	13.533	13.962	14.574	15.006
0.50393	0.98707	1.4651	2.008	2.5968	3.0122	3.5498	4.1939	4.6313	5.0107	5.5095	6.0712	6.7146	7.2192	7.3765	8.0028	8.5689	9.1191	9.6342	10.123	10.49	10.912	11.759	12.234	12.511	12.669	13.078	13.478	14.056	14.516	15.046
0.4916	0.99739	1.5007	2.0458	2.6284	3.0468	3.5117	4.1097	4.6043	5.0582	5.4592	6.0927	6.7375	7.1712	7.4991	8.0157	8.542	9.077	9.6634	10.214	10.817	10.833	11.793	12.08	12.528	12.563	13.024	13.478	13.831	14.247	15.205
0.48957	1.0429	1.5007	2.0622	2.6221	3.026	3.5804	4.1265	4.5774	5.0392	5.5195	6.0712	6.5893	7.2072	7.4132	7.99	8.542	9.1472	9.7366	10.199	10.459	10.928	11.726	12.063	12.721	12.598	12.952	13.515	13.981	14.574	15.346
0.48957	0.98707	1.4917	2.0731	2.6031	3.033	3.7755	4.1685	4.6403	4.9352	5.4692	6.2009	6.5554	7.1952	7.4622	8.0286	8.5018	9.063	9.766	10.063	10.275	10.944	11.659	12.063	12.581	12.669	12.97	13.552	13.849	14.381	15.165
0.54032	1.0008	1.4784	2.1062	2.6347	3.033	3.5421	4.2792	4.5684	4.9445	5.5095	6.0605	6.6006	7.1354	7.4868	7.99	8.5018	9.049	9.6342	10.169	10.154	11.04	11.659	11.944	12.633	12.757	12.988	13.533	13.943	14.419	15.406
0.47165	0.97343	1.4873	2.0896	2.6538	3.026	3.5727	4.1855	4.5863	4.9445	5.5297	6.19	6.5554	7.0523	7.3644	7.9131	8.542	8.9239	9.7073	10.154	10.661	11.04	11.56	12.046	12.493	12.669	13.114	13.478	14.056	14.613	15.105
0.49364	1.0043	1.5689	1.9919	2.6538	2.9985	3.5193	4.1013	4.6403	5.0012	5.4492	6.125	6.5554	7.1473	7.4254	8.1062	8.5152	8.9101	9.6926	10.123	10.336	10.944	11.593	12.097	12.546	12.952	13.277	13.496	14.094	14.497	14.986
0.48755	1.0078	1.5007	2.0134	2.5592	3.0053	3.5727	4.2024	4.6584	4.9352	5.5297	6.0391	6.4209	7.005	7.3037	8.1974	8.65	8.8963	9.7073	10.123	10.214	10.992	11.478	11.86	12.406	12.881	13.132	13.423	14.094	14.907	15.066
0.49979	0.9905	1.5323	2.0731	2.5842	3.0053	3.4364	4.1855	4.5684	5.0392	5.4793	6.0177	6.5667	7.0404	7.4132	8.0415	8.542	8.9101	9.6342	10.169	10.093	11.056	11.626	11.81	12.511	12.704	13.096	13.441	13.812	14.613	14.927
0.4916	0.9905	1.5277	2.0841	2.6094	3.0399	3.4739	4.1855	4.6765	4.8977	5.3596	6.0927	6.5893	7.1473	7.4132	8.0803	8.4083	8.8136	9.6342	10.018	10.184	10.976	11.593	11.877	12.303	12.721	12.97	13.478	13.57	14.381	15.026
0.48554	0.99739	1.4607	2.0134	2.6031	3.0468	3.4966	4.1517	4.6313	5.0202	5.4192	6.0391	6.612	7.1235	7.4132	7.99	8.65	8.7862	9.6926	10.367	10.351	11.088	11.577	12.012	12.476	12.669	12.899	13.332	13.626	14.574	15.145
0.48153	0.9905	1.5052	2.0567	2.6031	3.0607	3.5574	4.1855	4.8325	4.9445	5.5297	6.0177	6.5667	7.0641	7.3644	7.8748	8.475	8.9239	9.6196	10.033	10.459	11.024	11.593	11.995	12.303	12.669	13.006	13.423	13.7	14.848	15.006
0.48153	0.99394	1.5142	2.0458	2.5968	3.0957	3.5727	4.0431	4.3136	4.9728	5.5297	6.0284	6.5441	7.1235	7.5114	8.0673	8.542	8.8549	9.6051	10.214	10.367	10.865	11.494	12.182	12.268	12.686	13.006	13.423	13.831	14.75	14.828
0.49364	0.98707	1.5323	2.0951	2.5842	3.1238	3.5574	4.1433	4.6584	4.9823	5.5398	5.9433	6.4879	7.0404	7.3644	7.8494	8.5824	8.9933	9.6051	10.229	10.459	11.136	11.593	12.063	12.372	12.651	13.042	13.496	13.831	14.691	15.105
0.50601	0.98365	1.5505	2.0896	2.6031	3.1309	3.3916	4.1265	4.5774	4.8883	5.5702	6.0284	6.4992	7.1593	7.4132	8.0157	8.7316	9.091	9.6926	10.018	10.29	10.928	11.709	12.097	12.406	12.546	12.97	13.441	13.924	14.574	14.986
0.49773	1.0147	1.5187	2.0786	2.5968	3.1238	3.5193	4.2024	4.6856	4.9258	5.56	5.9539	6.3876	7.1235	7.6604	7.9259	8.5824	9.091	9.6488	9.9734	10.428	11.136	11.577	11.961	12.424	12.389	12.988	13.533	13.924	14.574	15.165
0.49979	1.0008	1.5007	2.134	2.6221	3.1806	3.4966	4.1517	4.6223	4.9728	5.5297	6.0177	6.6347	7.0878	7.4376	8.0028	8.5959	8.9239	9.678	10.29	10.413	10.865	11.494	12.165	12.441	12.633	13.06	13.589	14.037	14.477	15.225
0.49364	0.99739	1.4739	2.1228	2.6347	3.0538	3.5117	4.1685	4.5774	5.0582	5.56	5.9011	6.4879	7.0878	7.4254	8.2104	8.6094	8.9516	9.6051	10.184	10.505	11.024	11.527	11.911	12.686	12.686	13.259	13.793	13.849	14.691	15.205
0.50601	1.0358	1.5828	2.0731	2.673	3.0538	3.5498	4.093	4.5863	4.8883	5.56	5.9539	6.5554	7.1712	7.4499	7.9515	8.5959	8.9377	9.5615	10.199	10.413	10.754	11.347	12.046	12.511	12.757	13.222	13.589	13.831	14.73	15.145
0.4916	1.0147	1.5368	1.9336	2.5905	3.0191	3.5117	4.1181	4.5327	4.9445	5.5297	5.9539	6.5893	7.1712	7.5238	7.9643	8.5824	8.9794	9.6196	10.321	10.413	11.072	11.445	12.097	12.32	12.774	13.114	13.46	13.906	14.4	15.125
0.49773	0.97343	1.4828	2.0731	2.6284	3.0957	3.4589	4.1685	4.6584	5.0107	5.5195	6.1466	6.6574	7.1235	7.4745	7.8876	8.6229	9.063	9.6926	10.26	10.275	11.024	11.445	12.097	12.406	12.792	13.277	13.441	13.962	14.594	15.105
0.48957	1.0536	1.4917	2.0513	2.6347	3.1309	3.5421	4.1181	4.6403	4.9445	5.4793	6.0071	6.7146	7.2312	7.4745	7.9515	8.5286	9.1895	9.6196	10.229	10.552	11.676	11.412	12.114	12.389	12.792	13.259	13.552	14.17	14.574	15.205
0.47954	0.99394	1.5277	2.0567	2.5905	3.1097	3.5345	4.1181	4.6133	4.814	5.5297	5.9222	6.6233	7.3158	7.5114	7.9643	8.4884	9.3314	9.6488	10.184	10.367	10.96	11.511	12.165	12.441	13.042	13.186	13.405	14.151	14.594	15.225
0.49773	0.97004	1.5597	2.0677	2.7052	3.0677	3.5269	4.1433	4.6313	4.9445	5.5398	5.9116	6.5104	7.0641	7.4132	7.7356	8.3818	9.049	9.5181	10.275	10.49	11.072	11.428	12.097	12.406	12.988	13.132	13.496	14.208	14.652	15.467
0.47755	0.99394	1.5097	2.0622	2.6031	3.0957	3.5117	4.1433	4.5774	4.9258	5.4893	6.082	6.5216	7.0878	7.3158	7.8494	8.3552	8.9794	9.7073	10.244	10.443	11.217	11.478	12.046	12.616	12.917	13.15	13.405	14.151	14.285	15.467
0.48353	0.97683	1.5052	2.0458	2.5343	3.0887	3.5117	4.1601	4.6043	4.9823	5.4292	5.9011	6.5104	7.1712	7.4376	7.8621	8.3685	9.0072	9.547	10.199	10.428	11.104	11.445	12.097	12.441	12.863	13.168	13.405	14.019	14.419	15.185
0.48153	0.9905	1.4917	2.0951	2.5968	3.0957	3.6112	4.1685	4.5774	4.9164	5.4093	5.88	6.4992	7.1354	7.5238	8.0028	8.475	9.0351	9.576	10.169	10.521	11.056	11.445	11.995	12.459	12.81	13.114	13.423	13.906	14.17	15.225
0.47954	1.0113	1.5505	2.008	2.6411	3.0957	3.5269	4.2279	4.5238	4.9258	5.4192	6.0177	6.6688	7.1712	7.5609	8.0028	8.435	8.9933	9.678	10.154	10.474	10.96	11.347	11.961	12.493	13.06	13.096	13.533	14.037	14.769	14.947
0.50601	0.99739	1.5232	2.0404	2.6347	3.1027	3.5193	4.1601	4.4795	4.9917	5.4093	5.8591	6.5216	7.1712	7.6105	7.8367	8.5286	8.9377	9.5036	10.093	10.49	10.897	11.759	11.944	12.651	12.899	13.132	13.681	13.962	14.73	15.085
0.47954	1.0113	1.5414	2.1395	2.6221	3.1027	3.5041	4.1349	4.5953	4.9634	5.3993	5.9964	6.6347	7.1712	7.4991	8.0544	8.5018	8.7862	9.5905	10.29	10.459	11.104	11.643	12.046	12.355	12.721	13.241	13.332	14.056	14.75	15.085
0.50186	1.0078	1.5187	2.1173	2.5654	3.0817	3.5269	4.0846	4.5416	4.9445	5.4292	5.9645	6.5441	7.1712	7.4745	8.0157	8.435	8.8824	9.6488	10.214	10.474	10.912	11.577	12.097	12.389	12.917	13.386	13.607	14.056	14.633	15.145
0.49568	0.99394	1.4518	2.0242	2.6157	3.0607	3.5117	4.1685	4.6043	5.1253	5.3894	6.0071	6.6233	7.2192	7.5361	7.9003	8.5286	8.8274	9.576	10.184	10.397	10.928	11.593	12.165	12.424	12.988	13.186	13.515	14.019	14.711	15.145
0.5123	1.0008	1.5459	2.0731	2.5592	3.0399	3.4513	4.1855	4.6313	5.0297	5.4093	6.082	6.6574	7.1593	7.5114	8.0286	8.6094	8.8136	9.6196	10.169	10.474	11.249	11.643	11.944	12.511	13.295	13.114	13.478	13.906	14.711	15.65
0.5102	0.9905	1.4873	2.0841	2.5842	3.0817	3.6732	4.1517	4.6043	5.0202	5.4392	5.9328	6.612	7.1712	7.4622	8.1192	8.65	8.8411	9.5905	10.123	10.629	10.802	11.726	12.114	12.511	12.669	13.241	13.496	13.943	14.497	15.285
0.49773	0.99394	1.5368	2.0404	2.5654	3.1238	3.5193	4.1433	4.6403	5.0107	5.4592	5.9964	6.578	7.1593	7.4132	8.0544	8.6364	8.8963	9.5036	10.003	10.29	10.992	11.61	12.114	12.441	12.739	13.204	13.295	14	14.497	15.225
0.49364	0.98365	1.5232	2.0513	2.5968	3.0677	3.5269	4.1013	4.6584	4.9728	5.4392	5.9751	6.6006	7.0286	7.4622	8.0286	8.5286	8.8687	9.4604	10.063	10.413	11.056	11.709	11.961	12.355	13.186	13.132	13.386	13.981	14.594	15.085
0.49773	0.94986	1.5142	2.0296	2.6157	3.0607	3.4739	4.2109	4.6313	4.907	5.4392	6.1466	6.5667	7.1473	7.6729	8.1062	8.5152	8.8411	9.4892	10.229	10.428	10.865	11.428	12.114	12.303	12.633	13.204	13.386	14	14.75	15.245
0.48957	0.9905	1.4917	2.0404	2.5968	3.0677	3.4739	4.1601	4.6494	4.8697	5.4893	5.9858	6.6347	7.1473	7.5857	8.0673	8.5959	8.8963	9.4316	10.351	10.536	11.056	11.396	12.097	12.389	12.581	13.204	13.496	14.056	14.789	15.285
0.48755	0.97683	1.5368	2.0567	2.5467	3.138	3.5193	4.0597	4.6313	4.9634	5.4292	5.9328	6.5667	7.1712	7.4745	8.0673	8.65	8.9516	9.5181	10.214	10.96	10.944	11.428	12.063	12.424	12.739	13.168	13.35	13.831	14.711	15.346
0.48957	0.97343	1.5277	2.0458	2.6157	3.033	3.489	4.2109	4.5774	5.0012	5.4994	5.9645	6.5667	7.3158	7.5361	8.1712	8.7452	8.9377	9.4604	10.275	10.707	10.976	11.445	12.08	12.441	12.633	13.259	13.35	13.962	14.691	15.285
0.47954	0.97343	1.4784	2.0513	2.6031	3.0677	3.5345	4.0846	4.5684	4.9634	5.56	5.7964	6.5216	7.1712	7.6355	8.1843	8.6094	8.9377	9.4172	10.305	10.397	11.104	11.428	12.08	12.234	12.633	13.024	13.46	13.943	14.672	15.326
0.47954	0.9905	1.5277	2.0677	2.6094	3.0053	3.5345	4.1433	4.5953	4.9352	5.5398	5.9433	6.6347	7.1832	7.5114	8.2104	8.5286	8.8411	9.5036	10.214	10.567	10.802	11.544	12.012	12.441	12.633	13.006	13.423	13.831	14.711	15.185
0.48554	0.97004	1.5323	2.1062	2.5905	3.0957	3.5117	4.1181	4.6403	4.9352	5.56	5.9645	6.5329	7.0523	7.4745	7.9515	8.5286	8.8687	9.5325	10.244	10.723	11.072	11.593	11.995	12.355	12.774	13.078	13.478	13.756	14.574	15.125
0.49364	0.97683	1.5232	2.1062	2.6094	2.8964	3.5421	4.1097	4.5953	4.907	5.6109	5.9011	6.6006	7.1593	7.5485	7.9515	8.5286	8.9516	9.5181	10.244	10.645	10.96	11.643	12.131	12.459	12.686	12.774	13.552	13.906	14.828	15.085
0.51653	0.99739	1.5551	2.0951	2.5717	3.0747	3.5345	4.1181	4.6313	4.879	5.5499	5.9328	6.6802	7.0997	7.4868	8.0544	8.5286	8.9239	9.6051	10.26	10.629	10.992	11.461	12.165	12.563	12.757	12.988	13.515	13.887	14.711	15.245
0.52079	0.99739	1.5643	2.1173	2.5905	3.0399	3.5345	4.0597	4.6133	4.8883	5.5803	6.082	6.5216	7.0997	7.5485	8.0286	8.5286	8.9655	9.7513	10.018	10.552	10.881	11.428	12.148	12.406	12.721	13.06	13.313	13.868	14.691	15.026
0.47954	0.99394	1.5323	2.1395	2.6094	3.0468	3.5117	4.1349	4.5684	4.879	5.5195	5.9645	6.612	7.1116	7.4622	7.9515	8.5286	9.063	9.6342	10.078	10.567	11.008	11.314	12.251	12.441	12.739	12.988	13.46	14.075	14.555	14.907
0.48353	1.0008	1.5142	2.0786	2.5842	3.0468	3.5345	4.1181	4.5595	4.8697	5.4893	5.9539	6.7031	7.1473	7.4622	8.1062	8.5018	8.9794	9.7513	10.033	10.536	10.96	11.104	12.131	12.493	12.774	13.313	13.46	14.075	14.574	14.887
0.48153	0.98707	1.5142	2.0458	2.5842	2.9985	3.4739	4.2109	4.5953	4.9258	5.5499	6.0177	6.6233	7.2192	7.4745	7.9771	8.4483	9.0072	9.8397	9.9436	10.521	11.282	11.478	12.08	12.546	12.581	13.078	13.589	13.924	14.633	14.966
0.48755	0.99739	1.5414	2.0841	2.5905	3.0957	3.4814	4.1013	4.6313	5.0392	5.56	5.9858	6.7031	7.1116	7.4745	7.99	8.4216	8.9794	9.9287	9.9585	10.598	10.96	11.461	11.86	12.616	12.774	13.386	13.626	13.962	14.73	15.185
0.47558	0.96666	1.5323	2.0841	2.5281	3.033	3.5041	4.1855	4.6133	4.9445	5.6211	6.0284	6.8066	7.1473	7.4991	7.9515	8.4884	9.0351	9.8249	10.154	10.676	11.024	11.494	11.927	12.598	12.739	13.222	13.423	13.924	14.535	15.145
0.48353	0.9532	1.5505	2.1228	2.578	3.0887	3.5117	4.2109	4.6313	4.9445	5.4793	6.0498	6.772	7.0997	7.4868	7.99	8.435	8.9794	9.7513	10.048	10.645	10.849	11.136	11.961	12.476	12.721	13.313	13.57	13.981	14.477	15.285
0.47954	0.99394	1.5689	2.0896	2.4911	2.9916	3.4589	4.1601	4.6133	5.0012	5.5095	5.8486	6.7835	7.0878	7.5361	8.0544	8.65	9.077	9.5325	10.048	10.754	11.056	11.412	11.995	12.389	12.828	12.988	13.295	14.056	14.613	15.145
0.48755	0.97683	1.5232	2.1173	2.4667	3.0817	3.5421	4.1349	4.6584	5.0487	5.4994	5.8591	6.7375	7.1593	7.5857	8.0028	8.5018	8.9933	9.6196	10.123	10.428	11.04	11.494	11.995	12.372	12.686	13.222	13.35	14.17	14.574	15.066
0.47558	0.98365	1.5643	2.0567	2.6475	3.0399	3.5498	4.1433	4.6313	5.0582	5.5195	5.9858	6.7146	7.1832	7.4499	8.0544	8.7725	8.9239	9.9287	10.063	10.505	11.072	11.445	12.046	12.581	12.669	13.042	13.57	14.228	14.477	15.165
0.48153	0.98365	1.5052	2.035	2.5717	3.1097	3.5117	4.1433	4.6133	5.1061	5.5195	5.9964	6.7605	7.0641	7.5485	7.9003	8.5555	8.8963	9.7807	10.093	10.244	11.056	11.659	12.029	12.337	12.721	13.186	13.386	14.189	14.477	15.185
0.49568	0.9905	1.5187	2.0242	2.5905	3.033	3.5269	4.2024	4.6133	4.9917	5.5095	5.9751	6.6574	7.1354	7.4499	7.9643	8.6094	9.0072	9.7954	10.154	10.428	11.168	11.511	12.063	12.441	12.774	13.114	13.478	14.056	14.4	15.245
0.51653	0.9905	1.4917	2.035	2.5717	3.0607	3.5117	4.1517	4.5774	5.0582	5.4893	5.9539	6.6347	7.3522	7.3522	7.9771	8.5959	9.049	9.5615	10.138	10.521	11.201	11.544	12.029	12.546	12.704	12.845	13.441	13.924	14.535	15.205
0.52723	0.98707	1.5097	2.0622	2.6284	3.026	3.5269	4.177	4.6494	5.0582	5.4492	6.0391	6.5667	7.2192	7.4009	7.8748	8.6229	9.1754	9.6488	10.184	10.505	10.976	11.379	11.927	12.459	12.845	12.988	13.515	13.962	14.691	15.085
0.5123	1.0182	1.5097	2.0622	2.5842	2.9847	3.565	4.2024	4.7221	5.0392	5.3004	5.9858	6.6347	7.2553	7.3887	7.9771	8.5959	9.2177	9.8249	10.184	10.552	11.056	11.461	11.995	12.528	12.845	13.132	13.515	13.962	14.458	15.066
0.48353	0.99394	1.4962	2.008	2.5968	3.0399	3.565	4.1265	4.6313	5.0297	5.4793	6.0712	6.5216	7.3037	7.3887	7.99	8.6094	9.1472	9.6926	10.244	10.552	11.12	11.428	12.08	12.406	12.988	13.132	13.533	13.924	14.362	15.245
0.5102	1.0008	1.5232	1.9919	2.5905	3.0399	3.5574	4.093	4.6313	5.0392	5.4692	5.9433	6.5216	7.2795	7.3765	7.9259	8.475	9.077	9.7073	10.275	10.428	11.088	11.461	11.877	12.389	12.686	12.917	13.478	13.962	14.342	15.085
0.49773	1.0008	1.5142	2.0567	2.6157	3.0053	3.5421	4.177	4.6675	5.0487	5.3794	6.0284	6.5441	7.3037	7.4376	8.0028	8.5286	9.1331	9.678	10.169	10.552	11.072	11.445	11.961	12.355	12.828	13.078	13.478	14	14.555	15.125
0.52723	1.0323	1.5323	2.0567	2.6157	3.1027	3.6189	4.1939	4.6223	5.0965	5.4192	6.0284	6.5893	7.3158	7.4499	8.1062	8.5689	9.105	9.7366	10.169	10.583	11.072	11.693	12.131	12.441	12.774	13.259	13.386	14.019	14.574	15.205
0.50186	1.0113	1.5142	2.0242	2.6538	3.0607	3.6344	4.1939	4.6494	5.1736	5.33	6.0071	6.5893	7.3522	7.3887	8.0544	8.5689	9.091	9.6926	10.275	10.598	10.928	11.726	12.097	12.285	12.704	13.186	13.46	13.962	14.633	15.185
0.49979	0.98707	1.5052	2.0731	2.6666	3.0747	3.6577	4.1517	4.6403	4.9445	5.4292	5.9328	6.6233	7.3037	7.4254	8.0803	8.5152	9.1472	9.6634	10.275	10.552	11.33	11.445	12.148	12.251	12.528	13.204	13.57	13.943	14.691	15.225
0.50186	1.0078	1.5232	2.0677	2.6031	2.9985	3.6035	4.2279	4.6043	5.0012	5.56	5.9751	6.5441	7.2674	7.623	8.1062	8.475	8.9377	9.6051	10.184	10.49	11.024	11.626	12.217	12.32	12.739	13.15	13.644	13.962	14.75	15.225
0.48957	1.0043	1.5097	2.0951	2.6475	3.0468	3.6266	4.1265	4.6043	4.9258	5.4392	5.9539	6.6233	7.2312	7.7482	8.1062	8.7999	9.0072	9.576	10.184	10.583	11.201	11.544	12.148	12.355	12.792	13.06	13.626	14.189	14.613	15.125
0.49364	1.0043	1.4917	2.0622	2.5968	3.0399	3.6421	4.2194	4.6403	5.0202	5.5195	5.8906	6.646	7.2674	7.623	8.1452	8.5689	8.9101	9.5905	10.229	10.536	11.12	11.412	12.029	12.303	12.899	13.15	13.423	13.962	14.633	15.085
0.49364	1.0113	1.4651	2.0841	2.5968	3.026	3.5957	4.2535	4.5953	5.0012	5.6415	5.8591	6.6233	7.1952	7.5485	8.276	8.276	9.063	9.766	10.275	10.536	11.217	11.56	12.337	12.389	12.686	13.024	13.533	13.774	14.907	15.125
0.5081	0.99739	1.5052	2.0841	2.5654	3.033	3.5957	4.2024	4.5774	5.0869	5.662	5.8696	6.5329	7.2072	7.5361	8.1974	8.475	9.0351	9.766	10.321	10.629	11.12	11.478	12.08	12.355	12.845	13.06	13.515	13.737	14.828	15.046
0.5123	1.0043	1.5459	2.0786	2.6284	3.026	3.5957	4.2279	4.6223	5.0107	5.5297	5.8906	6.6347	7.1235	7.5857	8.1062	8.5152	9.091	9.8397	10.229	10.676	11.072	11.396	12.182	12.563	12.721	13.024	13.515	13.887	14.672	15.026
0.4916	1.0008	1.5277	2.1062	2.5654	3.0399	3.5727	4.1855	4.5505	4.9634	5.5398	6.0177	6.6233	7.3765	7.5238	7.9643	8.3685	8.9516	9.547	10.26	10.552	11.152	11.511	11.995	12.337	12.686	13.114	13.607	13.906	14.672	14.848
0.48554	1.0008	1.5505	2.1395	2.5968	3.0887	3.5117	4.2024	4.6043	5.0773	5.4994	5.9858	6.5329	7.2795	7.6105	8.0803	8.4083	9.077	9.7219	10.244	10.351	11.072	11.61	11.961	12.424	12.881	13.006	13.57	14.019	14.809	14.848
0.49773	0.9905	1.5643	2.0841	2.5968	3.1027	3.5498	4.2364	4.6043	4.954	5.56	5.9328	6.5554	7.1712	7.5114	8.0286	8.4483	9.091	9.678	10.184	10.397	11.072	11.61	12.08	12.337	12.774	13.042	13.496	14.056	14.809	14.947
0.5102	0.99394	1.5505	2.1395	2.5968	3.0399	3.5117	4.2621	4.5595	4.9728	5.4692	6.0284	6.6006	7.1593	7.4991	7.9771	8.475	8.9377	9.6926	10.244	10.336	11.072	11.577	11.944	12.372	12.757	13.024	13.441	13.774	14.75	15.165
0.50393	1.05	1.5643	2.0458	2.6031	3.1027	3.5421	4.2194	4.4795	4.9634	5.5499	5.9645	6.5893	7.1473	7.4745	8.0286	8.4216	9.0072	9.6051	10.305	10.443	11.088	11.56	11.86	12.217	12.899	13.078	13.719	13.981	14.789	15.285
0.5102	1.0008	1.5597	2.0841	2.5905	3.0887	3.4664	4.1265	4.5327	5.0487	5.5297	6.0177	6.6347	7.2433	7.4991	8.0673	8.4616	9.0351	9.678	10.169	10.521	11.249	11.659	11.978	12.217	12.881	13.042	13.496	14.037	14.828	15.285
0.49773	1.0008	1.5643	2.1006	2.5405	3.026	3.5041	4.1097	4.4005	4.9728	5.5702	6.0071	6.6006	7.2553	7.4745	8.0286	8.5152	9.049	9.5905	10.336	10.397	11.088	11.743	12.046	12.234	12.774	13.06	13.533	14.208	14.809	15.326
0.49773	0.9905	1.5597	2.0513	2.6031	3.0538	3.5804	4.1517	4.6403	5.0773	5.56	5.9964	6.6006	7.2795	7.4376	7.9643	8.276	9.105	9.6488	10.093	10.521	11.056	11.643	11.81	12.355	12.739	13.006	13.332	14.189	14.633	15.085
0.48957	0.97343	1.5505	2.0731	2.5654	3.0399	3.5345	4.093	4.4531	4.8604	5.5398	5.9433	6.4879	7.2795	7.3279	8.0028	8.5689	9.077	9.5905	10.199	10.614	11.024	11.56	11.843	12.389	12.845	13.096	13.405	14.189	14.594	15.205
0.49979	0.99739	1.6249	2.1062	2.5281	3.033	3.5041	4.093	4.6223	4.9445	5.6313	5.9328	6.4656	7.3158	7.4868	8.0544	8.5152	9.049	9.576	10.184	10.521	10.96	11.643	11.793	12.476	12.598	13.06	13.533	14.132	14.535	15.185
0.4916	0.99739	1.5368	2.0896	2.6094	3.0607	3.5041	4.0846	4.6223	5.1157	5.5499	6.0391	6.5893	7.2312	7.4745	8.0415	8.4483	8.9516	9.446	10.214	10.583	10.96	11.461	12.046	12.459	12.845	12.935	13.552	14.208	14.711	15.006
0.48755	0.99394	1.5874	2.0677	2.6221	3.0677	3.5498	4.1181	4.6584	4.9352	5.5499	6.0284	6.7835	7.2312	7.5733	8.0544	8.4083	9.0072	9.6488	10.244	10.645	10.77	11.428	12.029	12.372	12.686	13.042	13.405	14.113	14.887	15.225
0.48153	0.99394	1.5142	2.0731	2.5968	3.0538	3.5957	4.1097	4.7404	4.9917	5.5297	5.9858	6.6233	7.2553	7.4622	8.0544	8.5152	9.1754	9.899	10.184	10.77	10.849	11.445	12.012	12.424	12.899	13.042	13.332	14.056	14.868	15.225
0.49568	0.98024	1.5323	2.0786	2.6094	3.1168	3.5727	4.1349	4.5505	5.0012	5.5398	5.9328	6.6347	7.34	7.5733	8.0286	8.5689	8.9933	9.766	10.275	10.661	11.008	11.577	11.911	12.651	13.006	13.186	13.552	14.056	14.907	15.125
0.50393	0.99394	1.5097	2.0896	2.6411	3.0677	3.5269	4.0763	4.4795	4.8604	5.56	5.9433	6.749	7.2433	7.4376	7.99	8.5689	9.1331	9.678	10.244	10.754	10.928	11.56	12.063	12.739	12.917	13.241	13.405	14.019	15.006	15.185
0.45812	1.0008	1.5414	2.0841	2.6538	3.0887	3.5498	4.0846	4.5505	4.9823	5.5398	5.9433	6.7605	7.1832	7.4991	7.9643	8.5689	9.1331	9.6051	10.154	10.707	11.056	11.61	11.995	12.511	12.828	13.186	13.441	14.113	14.789	15.265
0.47361	0.9905	1.5414	2.1062	2.6411	3.0122	3.5269	3.9772	4.5595	5.0869	5.56	6.0498	6.5893	7.3279	7.5361	7.99	8.4616	9.063	9.766	10.184	10.645	11.024	11.61	11.911	12.303	12.774	13.06	13.295	14	14.516	15.265
0.48153	1.0008	1.5597	2.0513	2.6221	3.0399	3.5421	4.093	4.4883	5.0392	5.6007	6.0177	6.646	7.3887	7.4868	7.99	8.5018	9.1191	9.8693	10.184	10.661	11.056	11.659	11.927	12.459	12.792	13.042	13.222	13.924	14.594	15.346
0.48957	1.05	1.5735	2.0134	2.6157	3.1097	3.4589	4.1181	4.6043	4.9728	5.5398	5.9964	6.5893	7.3279	7.5114	7.9387	8.5286	8.9516	9.6488	10.169	10.645	11.088	11.643	11.995	12.268	12.792	12.952	13.368	13.962	14.711	15.185
0.50186	0.96666	1.5414	2.1062	2.6347	3.1097	3.5421	4.1517	4.6133	4.9823	5.4994	6.0927	6.5104	7.3522	7.4745	7.9771	8.4884	9.1331	9.4748	10.184	10.661	11.12	11.544	11.978	12.493	12.845	13.042	13.496	13.981	15.026	15.185
0.5102	0.98707	1.5232	2.008	2.578	3.0887	3.5117	4.0266	4.5595	4.9634	5.5499	5.9751	6.5554	7.2553	7.4499	7.99	8.4616	8.9101	9.6342	10.351	10.739	11.136	11.659	11.86	12.459	12.81	12.952	13.496	13.924	14.613	15.066
0.49773	1.0008	1.5232	2.0677	2.578	3.0957	3.4664	4.0514	4.5416	5.0202	5.5195	5.9222	6.646	7.3158	7.4132	7.99	8.5018	9.063	9.8249	10.214	10.598	11.024	11.56	11.843	12.406	12.863	13.024	13.607	13.887	14.304	15.326
0.5081	0.99739	1.5323	2.0951	2.6221	3.0957	3.5269	4.0763	4.5061	4.9728	5.6313	6.125	6.5667	7.2433	7.5238	8.1062	8.5555	9.0072	9.576	10.29	10.629	11.056	11.626	12.08	12.528	12.881	13.06	13.405	13.924	14.094	15.245
0.48554	1.0253	1.5414	2.0458	2.6666	3.0399	3.489	4.093	4.6133	5.0392	5.5297	6.0284	6.578	7.2553	7.3765	7.9259	8.5959	8.9655	9.7073	10.382	10.614	10.976	11.743	11.81	12.493	12.792	12.988	13.277	13.812	14.769	15.245
0.49364	0.9432	1.5597	2.1451	2.5905	3.0957	3.5193	4.0763	4.5953	5.0107	5.5195	6.0177	6.646	7.2553	7.623	8.0544	8.5152	8.9655	9.5615	10.275	10.505	11.024	11.743	12.182	12.493	12.686	13.042	13.607	13.756	14.769	15.205
0.49568	1.0323	1.5007	2.0677	2.553	3.0747	3.565	4.1349	4.5774	5.0202	5.6517	6.0071	6.612	7.2072	7.4991	8.0028	8.6229	8.9516	9.9585	10.214	10.521	11.008	11.643	12.046	12.616	12.563	12.97	13.626	13.793	14.848	15.245
0.48957	1.0078	1.4962	2.0567	2.5343	3.0468	3.5498	4.1433	4.5149	4.9823	5.6007	6.0177	6.6233	7.2192	7.5485	7.8114	8.5824	8.9794	9.6196	10.199	10.428	11.136	11.527	12.012	12.372	12.792	13.078	13.441	13.774	14.613	15.165
0.49773	0.98365	1.5277	2.0677	2.5842	2.9847	3.5804	4.1181	4.5595	4.9445	5.5297	6.0284	6.5667	7.1593	7.5609	7.9003	8.5286	8.9377	9.6926	10.184	10.552	10.992	11.445	11.86	12.406	12.952	13.042	13.533	13.981	14.672	15.406
0.48755	0.98024	1.5097	2.0677	2.5968	2.9847	3.5574	4.093	4.5863	4.9258	5.5398	6.0071	6.612	7.4132	7.4254	7.9003	8.6094	9.0351	9.7073	10.305	10.459	10.897	11.363	12.012	12.476	12.899	13.078	13.478	14.056	14.73	15.205
0.49773	0.99739	1.5232	2.0896	2.6157	2.9437	3.5421	4.0846	4.6133	4.9823	5.6007	6.1035	6.6006	7.1952	7.623	7.9131	8.5689	8.7725	9.6196	10.321	10.351	10.976	11.527	11.978	12.424	12.988	12.899	13.441	13.812	14.73	15.245
0.49364	0.97004	1.5414	2.0622	2.6031	3.0191	3.5269	4.1349	4.5416	4.9823	5.6109	6.1035	6.6574	7.1832	7.623	7.824	8.5286	8.8136	9.6342	10.199	10.583	10.992	11.461	12.046	12.355	12.881	12.952	13.441	13.737	14.672	15.085
0.49773	0.98365	1.5232	2.0513	2.6031	3.0747	3.6189	4.2024	4.5953	5.0392	5.5095	6.0712	6.3765	7.2674	7.6604	8.0157	8.5824	8.9377	9.6488	10.108	10.367	10.992	11.461	11.995	12.546	12.81	13.024	13.441	13.644	14.73	15.427
0.49773	0.98024	1.5232	2.0622	2.5842	3.0191	3.5957	4.093	4.5774	5.0297	5.5095	6.0391	6.5893	7.0878	7.5609	8.0544	8.3818	9.0351	9.6196	10.199	10.459	11.008	11.445	12.114	12.528	12.774	13.132	13.46	13.719	14.73	14.927
0.50601	0.99394	1.5323	2.0458	2.578	3.033	3.6112	4.0763	4.7679	4.9445	5.5095	6.1035	6.612	7.1354	7.4991	7.9131	8.5286	8.8549	9.678	10.138	10.367	11.024	11.56	11.944	12.372	12.739	13.132	13.46	13.849	14.497	15.185
0.4916	1.0043	1.5414	2.0622	2.553	3.0191	3.5041	4.2109	4.6043	4.9728	5.5195	6.082	6.4992	7.0997	7.4868	8.0028	8.3156	8.9101	9.7366	10.184	10.397	10.944	11.56	11.894	12.441	12.845	13.114	13.423	13.943	14.574	15.306
0.49568	1.0078	1.5277	2.0404	2.6221	3.026	3.565	4.093	4.5953	4.879	5.5095	6.1575	6.5554	7.0878	7.698	8.0803	8.342	9.091	9.766	10.123	10.598	10.912	11.659	11.944	12.372	12.988	13.204	13.478	13.831	14.73	14.986
0.51865	1.0043	1.4962	2.0786	2.6475	3.0677	3.565	4.1433	4.6043	4.8697	5.4192	6.125	6.5893	7.1712	7.6105	8.1582	8.4216	8.8549	9.7807	10.154	10.505	10.912	11.709	11.961	12.406	12.988	13.241	13.46	13.737	14.4	15.085
0.49773	0.98365	1.5414	2.0677	2.5654	3.0468	3.5117	4.1517	4.6133	5.0012	5.4192	6.0498	6.6233	7.1116	7.5609	8.0286	8.5018	8.9377	9.7366	10.048	10.676	10.96	11.659	11.961	12.355	12.863	13.332	13.405	13.737	14.691	15.066
0.48554	1.0008	1.5232	2.0841	2.5467	3.0677	3.4664	4.0763	4.6043	4.9823	5.4492	6.0071	6.5667	7.0641	7.5485	8.0286	8.5152	9.0351	9.4748	10.169	10.459	10.912	11.659	12.046	12.441	13.024	13.222	13.405	13.719	14.594	15.165
0.48554	0.9905	1.6014	2.0786	2.6031	3.0677	3.5881	4.0266	4.7679	4.9352	5.4492	6.0177	6.5441	7.0759	7.5981	7.8748	8.4616	9.0351	9.6488	10.199	10.505	11.185	11.676	12.08	12.511	13.006	13.241	13.386	13.868	14.555	14.966
0.48957	0.95991	1.4962	2.1507	2.5592	3.0677	3.5727	4.1601	4.6584	5.0392	5.4893	6.1035	6.5329	7.0168	7.4991	7.99	8.4483	9.0072	9.547	10.351	10.567	11.008	11.776	12.097	12.546	12.917	13.186	13.57	13.626	14.4	15.185
0.50186	0.98365	1.5551	2.1062	2.6411	3.033	3.4289	4.2109	4.5416	4.9823	5.4893	5.8906	6.5554	7.0641	7.4622	7.99	8.475	8.9933	9.547	10.336	10.598	10.992	11.693	12.08	12.669	12.881	13.204	13.386	13.719	14.555	15.265
0.48957	1.0182	1.5187	2.0786	2.5281	3.033	3.5041	4.1517	4.6584	4.9823	5.56	6.1358	6.578	7.1235	7.5114	8.0673	8.435	9.091	9.8102	10.123	10.49	11.088	11.676	12.046	12.581	12.899	13.132	13.515	13.756	14.477	15.085
0.46387	0.97683	1.5142	2.0731	2.6221	2.9985	3.5193	4.0846	4.6856	5.0202	5.4492	6.1358	6.6347	7.2674	7.5485	7.9515	8.4616	9.1613	9.5905	10.382	10.474	10.96	11.793	12.234	12.546	13.006	13.241	13.441	13.793	14.228	15.285
0.49364	0.98365	1.5232	2.0677	2.6031	3.0053	3.4966	4.1181	4.6584	4.9634	5.4994	6.0712	6.5329	7.1712	7.7482	7.8748	8.4884	9.2461	9.678	10.428	10.723	10.96	11.743	12.148	12.424	12.881	13.204	13.222	13.7	14.497	15.265
0.49364	1.0008	1.5187	2.0242	2.5842	3.0191	3.5269	4.0348	4.5953	4.9728	5.4793	6.0391	6.6233	7.0168	7.4254	7.9259	8.4083	9.1191	9.5036	10.305	10.459	11.024	11.643	12.406	12.424	12.845	12.935	13.423	13.756	14.594	15.105
0.48755	0.99394	1.5551	2.0622	2.5717	2.9847	3.5193	4.0763	4.5061	4.9823	5.5398	5.9116	6.6347	7.1116	7.4745	7.99	8.3818	9.105	9.5325	10.305	10.692	11.04	11.61	12.148	12.372	12.81	12.952	13.332	13.831	14.907	15.105
0.49773	0.96666	1.5052	2.0951	2.5096	2.9779	3.5193	4.1517	4.5327	4.9258	5.5499	6.125	6.578	7.0759	7.5114	7.9131	8.3552	9.1613	9.5036	10.351	10.351	10.96	11.544	12.097	12.406	12.739	12.97	13.313	13.719	14.516	15.185
0.5102	1.0078	1.5414	2.0134	2.6602	3.0053	3.4966	4.1265	4.5595	4.8977	5.5398	5.9964	6.612	7.1473	7.4745	8.0673	8.5286	9.1895	9.6634	10.214	10.443	11.008	11.61	12.046	12.441	12.739	13.024	13.423	13.943	14.574	15.225
0.49364	0.99739	1.5187	2.1006	2.6031	2.9847	3.4966	4.2535	4.5505	4.9823	5.5905	6.2993	6.5329	7.2072	7.4991	7.99	8.5018	9.1613	9.6051	10.26	10.413	10.897	11.544	12.097	12.459	12.988	12.97	13.607	13.831	14.652	14.848
0.5081	0.95991	1.5277	2.1006	2.6538	2.9985	3.5117	4.1433	4.5238	4.8511	5.5803	6.1035	6.5104	7.3158	7.4622	7.9771	8.5555	9.1331	9.4892	10.154	10.214	10.96	11.544	12.165	12.598	12.952	12.952	13.663	13.812	14.73	14.947
0.48957	1.0008	1.5414	1.9973	2.6602	2.9985	3.5117	4.0348	4.5595	4.9917	5.6211	6.1466	6.4767	7.0286	7.4132	7.9771	8.5959	9.0211	9.5615	10.199	10.661	10.881	11.56	11.911	12.285	12.792	13.078	13.441	14	14.672	14.966
0.48153	1.0008	1.5277	2.0567	2.6475	3.0191	3.5193	4.1349	4.5684	4.9164	5.6109	6.3434	6.578	7.2433	7.4745	7.9259	8.5018	8.9239	9.5615	10.154	10.397	10.976	11.56	11.877	12.528	12.669	13.132	13.405	13.962	14.633	15.346
0.48755	0.99394	1.5277	2.0622	2.6094	2.9916	3.5269	4.1097	4.6223	4.9258	5.56	6.0177	6.578	7.4009	7.3765	7.9643	8.5689	9.0351	9.4892	10.229	10.428	11.201	11.445	11.978	12.459	12.899	13.006	13.46	13.812	14.613	15.006
0.4916	0.99739	1.5735	2.0786	2.5654	3.033	3.5421	4.1097	4.6043	4.9164	5.5702	6.1358	6.5554	7.2072	7.3522	8.0544	8.5824	8.9933	9.5036	10.275	10.474	11.104	11.347	11.944	12.528	12.563	12.97	13.332	13.868	14.419	15.026
0.48957	1.0043	1.5232	2.0841	2.578	2.9779	3.4589	4.1601	4.5953	4.8697	5.5297	6.082	6.6233	7.0759	7.3887	8.0544	8.5286	9.049	9.4604	10.26	10.382	11.008	11.217	11.86	12.669	12.863	12.828	13.57	14.056	14.769	15.125
0.48755	0.97343	1.5142	2.0567	2.6031	3.0191	3.4589	4.1939	4.6765	4.9634	5.4893	6.0712	6.6233	7.1593	7.3887	8.0673	8.5824	9.049	9.4748	10.244	10.49	11.152	11.494	11.877	12.633	12.792	12.97	13.405	13.849	14.691	15.306
0.49568	1.0113	1.5643	2.0786	2.6475	3.026	3.5117	4.1013	4.6133	4.8977	5.662	6.1466	6.6006	7.2674	7.3765	7.8748	8.542	9.1191	9.4172	10.169	10.382	10.976	11.527	12.08	12.441	12.669	13.024	13.368	13.831	14.672	15.125
0.50186	1.0147	1.5323	2.0896	2.5842	2.9847	3.5269	4.245	4.5416	4.9352	5.6415	6.125	6.578	7.1712	7.4009	8.0028	8.6094	8.8687	9.4316	10.138	10.474	11.168	11.544	11.978	12.493	12.828	13.114	13.186	13.849	14.711	15.066
0.51441	0.97004	1.5277	2.1062	2.5905	3.0747	3.4364	4.1685	4.6403	4.9164	5.5297	6.0712	6.5329	6.9698	7.4376	7.8876	8.6635	8.9655	9.4604	10.214	10.382	10.29	11.659	12.046	12.563	12.757	13.006	13.405	13.906	14.887	15.066
0.49979	0.99739	1.5277	2.0677	2.6157	3.0957	3.5193	4.0846	4.5953	4.9634	5.5499	6.0927	6.5667	7.0523	7.4254	8.0157	8.65	9.2036	9.7219	10.214	10.428	11.056	11.396	11.995	12.493	12.704	13.259	13.368	13.887	14.848	15.006
0.48554	0.96666	1.5323	2.0242	2.5968	3.0191	3.5041	4.1349	4.5327	4.954	5.5398	6.0712	6.578	7.1473	7.4868	8.1062	8.65	9.2177	9.6196	10.26	10.351	11.008	11.659	12.131	12.476	12.739	13.078	13.533	13.943	14.672	15.066
0.48554	0.98024	1.4917	2.0951	2.5905	3.0607	3.4966	4.177	4.5774	5.0392	5.5095	6.082	6.6233	7.1116	7.5238	8.0673	8.4884	9.077	9.5615	10.169	10.474	11.233	11.494	12.165	12.511	12.651	13.024	13.533	13.943	14.789	15.085
0.49364	1.0008	1.5232	2.0841	2.6094	3.0468	3.5498	4.1601	4.5863	4.9823	5.4692	6.0927	6.6233	7.005	7.4622	8.0157	8.5152	9.105	9.4604	10.154	10.567	10.912	11.412	12.234	12.563	12.774	13.15	13.737	13.981	14.75	15.006
0.48353	0.98365	1.5414	2.0622	2.5343	3.0468	3.5193	4.245	4.5953	4.9164	5.5195	6.1575	6.6006	7.0997	7.5114	8.1192	8.5286	9.063	9.5181	10.199	10.552	10.96	11.577	12.251	12.528	12.739	13.186	13.496	14	14.555	15.066
0.46969	1.0078	1.5414	2.0458	2.6031	3.0607	3.5574	4.1433	4.5953	5.0297	5.6007	6.0712	6.7031	7.0286	7.4991	8.1062	8.5018	9.105	9.5325	10.154	10.536	10.976	11.56	12.165	12.476	12.845	13.132	13.405	14.019	14.574	15.105
0.48957	0.98707	1.5277	2.0404	2.5968	3.0399	3.5269	4.1097	4.6584	5.0107	5.4994	6.0605	6.6574	7.1116	7.4499	8.0932	8.4884	9.105	9.5615	10.154	10.536	11.008	11.61	11.726	12.493	12.546	13.096	13.478	14.019	14.555	15.085
0.49364	1.0008	1.5187	2.0404	2.6094	3.0538	3.5269	4.2194	4.6494	5.0012	5.56	6.0284	6.6917	7.1712	7.4868	8.0544	8.5689	9.1331	9.576	10.138	10.676	11.12	11.511	12.131	12.511	12.952	13.15	13.46	14	14.4	15.265
0.49364	1.0078	1.4962	2.0296	2.5842	3.026	3.4814	4.177	4.6313	4.9917	5.6109	6.0391	6.5441	7.1473	7.4132	8.0544	8.542	9.049	9.5325	10.184	10.521	11.056	11.544	12.029	12.616	12.988	13.204	13.589	14.075	14.555	15.225
0.4916	1.0078	1.5323	2.0458	2.5968	3.0399	3.489	4.2535	4.6494	5.0012	5.4994	6.0498	6.4544	7.0168	7.4132	8.1452	8.542	9.1895	9.6196	10.244	10.536	11.072	11.56	12.114	12.459	12.97	13.222	13.386	14.362	14.652	15.326
0.49568	1.0253	1.5459	2.0567	2.5281	3.033	3.4739	4.2621	4.6313	4.9634	5.6928	6.0498	6.4767	7.3887	7.3765	8.0803	8.5018	9.0072	9.576	10.169	10.598	11.024	11.61	12.234	12.616	12.917	13.204	13.533	13.607	14.691	15.265
0.49568	1.0288	1.5551	2.0458	2.578	2.9437	3.5574	4.2109	4.6133	4.9728	5.4994	6.0498	6.4879	7.2433	7.4745	8.1322	8.542	8.9794	9.766	10.184	10.661	10.928	11.428	12.131	12.739	12.988	13.35	13.295	13.924	14.711	15.145
0.49568	0.96328	1.5368	2.035	2.5968	3.0191	3.4814	4.2024	4.5863	4.9258	5.5195	6.0391	6.5329	7.1832	7.4868	8.0932	8.4616	9.0351	9.6342	10.351	10.629	11.024	11.544	12.097	12.774	12.81	13.204	13.607	14.304	14.594	15.125
0.49979	0.9905	1.5097	2.0458	2.5968	3.0191	3.4814	4.177	4.6133	4.9352	5.56	5.9116	6.578	7.1712	7.4622	8.0286	8.542	9.063	9.6926	10.275	10.567	10.944	11.626	12.165	12.669	12.881	13.042	13.756	13.774	14.535	15.225
0.50601	0.9905	1.5368	2.0134	2.6602	3.0053	3.5117	4.1855	4.4707	4.8883	5.6517	6.0284	6.5893	7.2433	7.5238	8.0286	8.5555	9.0351	9.5615	10.275	10.443	11.072	11.577	12.097	12.511	12.952	13.042	13.241	13.793	14.497	15.085
0.52723	0.97683	1.5643	2.0026	2.5592	3.0053	3.5269	4.1181	4.4972	4.8697	5.5905	6.0284	6.5441	7.1952	7.4868	7.8621	8.5018	9.1191	9.4748	10.275	10.397	10.881	11.363	12.063	12.633	12.598	13.06	13.332	13.793	14.594	15.066
0.50186	1.0429	1.4695	2.0296	2.6031	3.1027	3.4739	4.1349	4.4355	4.7679	5.5905	6.0284	6.5216	7.1235	7.4868	7.9003	8.4884	9.091	9.5905	10.244	10.459	11.088	11.527	12.114	12.651	12.81	13.06	13.496	13.943	14.555	14.947
0.50393	0.98024	1.5142	2.0567	2.553	3.0538	3.5574	4.0597	4.4795	5.0012	5.56	5.9645	6.5554	7.1116	7.5361	7.9387	8.395	9.2602	9.547	10.184	10.428	10.881	11.56	12.114	12.633	12.757	13.024	12.988	14.037	14.594	15.066
0.48353	1.0217	1.5097	2.0677	2.6031	3.026	3.5421	4.1097	4.5595	5.0297	5.6313	5.9116	6.4879	7.1116	7.5857	7.8494	8.4483	9.091	9.678	10.063	10.413	10.928	11.527	12.114	12.234	12.81	12.935	13.496	13.849	14.633	15.006
0.49979	1.0113	1.5277	2.0622	2.6094	3.0957	3.565	4.0763	4.6313	4.8977	5.5297	5.9964	6.4879	7.1832	7.6604	8.0286	8.4083	9.049	9.4892	10.093	10.413	10.629	11.659	12.046	12.372	12.97	13.114	13.478	13.962	14.535	14.907
0.48353	1.0078	1.4962	2.0786	2.6411	3.0122	3.5804	4.093	4.6403	4.9352	5.5702	5.9539	6.578	7.1593	7.6729	7.99	8.395	9.049	9.5036	10.184	10.459	11.008	11.428	12.165	12.528	12.651	13.096	13.607	13.924	14.535	15.046
0.47558	1.0182	1.5097	2.1006	2.5968	3.0399	3.5727	4.1939	4.6765	4.907	5.4793	5.9964	6.7146	7.1593	7.5238	7.99	8.435	8.9794	9.547	10.244	10.567	10.802	11.86	12.046	12.337	12.845	13.096	13.533	13.887	14.574	15.205
0.48554	1.0008	1.5323	2.0841	2.5405	3.0053	3.5498	4.1685	4.6675	4.8977	5.4793	6.0927	6.6006	7.1712	7.5361	8.0157	8.4483	8.8963	9.5181	10.305	10.614	10.944	11.659	12.046	12.285	12.792	13.024	13.423	13.906	14.73	15.105
0.48554	0.98707	1.5597	2.0731	2.6284	3.0122	3.5804	4.1601	4.6584	4.8977	5.4492	5.9539	6.6006	7.2553	7.5361	8.0286	8.475	8.8824	9.4604	10.199	10.382	10.802	11.626	11.927	12.251	12.828	13.186	13.515	13.774	14.75	15.165
0.48554	1.0182	1.5323	2.0677	2.578	3.0468	3.4364	4.068	4.7038	4.9634	5.4292	5.9645	6.646	7.0523	7.5857	8.0803	8.4884	8.8549	9.5615	10.26	10.413	11.185	11.412	11.86	12.32	12.899	13.042	13.423	13.812	14.555	14.927
0.48755	0.97004	1.5643	2.0677	2.5654	3.0607	3.489	4.1433	4.713	4.954	5.5398	6.0284	6.6802	7.1952	7.4991	8.0415	8.395	8.8963	9.678	10.229	10.567	10.96	11.593	11.81	12.406	12.774	13.024	13.295	13.812	14.594	15.046
0.4916	0.96328	1.5232	2.1062	2.6284	3.0607	3.5041	4.1601	4.6494	4.9634	5.4893	6.0498	6.5893	7.2674	7.5238	8.0157	8.5152	8.9794	9.4029	10.26	10.443	10.976	11.743	11.894	12.217	12.828	13.186	13.441	13.981	14.652	15.085
0.51441	0.9532	1.5097	2.1117	2.6347	3.0191	3.4814	4.1685	4.6403	5.0107	5.4392	5.9858	6.6347	7.1235	7.4499	8.0415	8.4216	9.0072	9.5905	10.169	10.382	10.928	11.626	11.978	12.337	12.863	13.241	13.46	13.924	14.613	15.066
0.49364	0.9905	1.5368	2.1173	2.6094	3.0122	3.4739	4.1349	4.6403	4.9445	5.4592	6.0071	6.5554	7.1116	7.4499	8.0028	8.4216	8.7589	9.6051	10.123	10.49	10.992	11.577	11.911	12.234	12.863	13.06	13.533	13.962	14.613	14.986
0.51653	0.98024	1.5142	2.0896	2.5654	3.0053	3.4814	4.1181	4.6947	4.9258	5.5499	6.0927	6.5893	7.0997	7.4868	8.0544	8.542	8.9516	9.7513	10.063	10.505	11.008	11.759	12.012	12.355	12.845	13.15	13.405	14	14.711	15.225
0.48153	0.97343	1.5187	2.0951	2.5842	3.1238	3.5193	4.1349	4.7679	5.0012	5.4392	6.0071	6.612	7.1832	7.4254	8.1452	8.6364	8.9794	9.6342	10.29	10.49	10.976	11.577	12.012	12.459	13.186	13.114	13.533	13.981	14.516	15.205
0.49773	0.97004	1.4917	2.1284	2.6347	3.0538	3.5041	4.1517	4.6856	5.0012	5.6211	5.9645	6.6006	7.1235	7.4745	8.0673	8.6364	9.0211	9.6634	10.169	10.413	10.928	11.577	12.063	12.476	12.917	13.06	13.441	13.831	14.789	15.145
0.4916	0.98365	1.4962	2.1062	2.6157	3.026	3.5727	4.1855	4.5774	4.9164	5.4893	6.0284	6.578	7.2192	7.3887	8.1974	8.5152	8.9239	9.4748	10.184	10.49	10.96	11.626	12.097	12.493	12.81	12.828	13.332	13.887	14.75	15.185
0.5081	0.97004	1.4784	2.1117	2.6221	3.0468	3.5574	4.1097	4.6043	4.9164	5.4392	6.0498	6.6574	7.2312	7.34	8.1062	8.7043	8.9377	9.5905	10.138	10.505	11.04	11.86	12.097	12.424	12.757	13.006	13.204	13.906	14.73	14.947
0.49979	0.99394	1.5007	2.1228	2.6094	3.0399	3.5574	4.1433	4.6313	4.9164	5.5095	6.0391	6.6688	7.2433	7.3158	8.0157	8.2892	9.0211	9.576	10.138	10.505	11.152	11.927	12.046	12.459	12.721	13.024	13.332	13.943	14.516	14.947
0.4916	1.0008	1.5459	2.0731	2.5842	3.026	3.5041	4.1265	4.5953	4.9164	5.5803	6.0498	6.4879	7.2553	7.4254	7.9771	8.342	8.9516	9.6342	10.184	10.459	11.12	11.659	12.046	12.476	12.899	13.042	13.496	13.868	14.769	15.285
0.4916	0.98365	1.5459	2.1006	2.6157	3.0747	3.4438	4.0846	4.6584	4.9258	5.5398	6.0498	6.4656	7.2795	7.3522	8.0157	8.4884	9.1191	9.6488	10.169	10.474	11.104	11.61	12.217	12.459	12.739	13.132	13.478	13.924	14.633	15.306
0.50393	0.9905	1.5007	2.0896	2.6157	3.0538	3.5117	4.1855	4.5595	5.0107	5.4793	6.0284	6.6006	7.2795	7.4009	8.0157	8.4083	9.049	9.766	10.275	10.536	11.104	11.511	12.285	12.546	12.899	12.988	13.57	13.831	14.652	15.046
0.49568	0.99739	1.5414	2.0622	2.578	3.0817	3.5041	4.1265	4.5863	4.954	5.4893	6.0284	6.5554	7.1832	7.3522	7.9387	8.5286	9.091	9.8545	10.305	10.614	11.104	11.461	12.303	12.389	12.935	13.241	13.663	13.831	14.769	15.185
0.49568	0.97004	1.4962	2.1006	2.5717	3.0607	3.5041	4.1601	4.5953	5.0869	5.5095	6.0605	6.5104	7.1593	7.3522	7.9515	8.435	9.049	9.7366	10.229	10.459	11.024	11.282	12.08	12.251	12.828	13.06	13.607	13.943	14.574	15.185
0.49773	1.0217	1.5505	2.0622	2.6031	3.0887	3.4966	4.1433	4.5327	4.954	5.5499	6.0927	6.6347	7.1832	7.34	8.0415	8.435	8.9516	9.7954	10.321	10.351	11.396	11.461	12.08	12.441	12.97	13.096	13.441	13.887	14.555	15.085
0.50186	0.9905	1.5323	2.0731	2.5405	2.9916	3.4739	4.1265	4.6133	5.0202	5.4893	6.0391	6.5667	7.2915	7.3887	8.1062	8.5824	8.9516	9.7513	10.184	10.305	11.201	11.544	12.063	12.389	12.935	13.006	13.533	13.924	14.594	14.907
0.48353	1.0147	1.5505	2.0677	2.5592	3.0538	3.3991	4.0431	4.6313	4.9728	5.5803	5.9539	6.5667	7.2072	7.3279	7.99	8.5286	8.8824	9.7219	9.9585	10.367	11.056	11.445	12.251	12.285	12.792	12.739	13.552	13.943	14.652	14.966
0.48957	0.99394	1.5277	2.1006	2.578	3.0607	3.3916	4.1013	4.5595	5.0297	5.6517	5.9645	6.5554	7.3037	7.3522	7.9259	8.542	8.9516	9.7366	10.108	10.459	10.944	11.709	12.08	12.424	12.739	13.06	13.46	13.924	14.535	14.907
0.48353	0.99739	1.4475	2.1173	2.6602	3.0957	3.4289	4.1265	4.5953	4.9728	5.6109	5.9645	6.5329	7.2674	7.3644	7.9771	8.6094	8.9933	9.8693	10.003	10.428	10.897	11.676	12.148	12.493	12.97	12.792	13.386	13.849	14.75	14.947
0.4916	0.98024	1.5187	2.0513	2.6094	2.9099	3.489	4.093	4.5238	4.9823	5.5803	5.9964	6.578	7.2674	7.3644	8.0286	8.5824	8.9377	9.4748	10.244	10.505	11.088	11.743	12.097	12.493	12.81	13.132	13.423	13.831	14.789	15.225
0.48554	0.98707	1.5097	2.0896	2.5968	3.1027	3.4438	4.1685	4.5595	4.9634	5.5499	5.9328	6.5554	7.2072	7.34	8.0286	8.5824	8.9101	9.7073	10.138	10.552	10.881	11.643	12.114	12.459	12.881	13.204	13.552	14.037	14.633	15.105
0.49364	0.99739	1.5505	2.0731	2.6538	3.0677	3.4739	4.0846	4.814	4.9352	5.4292	5.9116	6.4992	7.2553	7.2433	8.0286	8.6907	8.9516	9.6634	10.169	10.49	10.912	11.693	12.029	12.476	12.792	13.078	13.607	14.132	14.613	15.085
0.47755	1.0008	1.5414	2.035	2.5654	3.0817	3.4438	4.0431	4.6133	4.9352	5.5095	5.9328	6.5104	7.2072	7.3522	8.0415	8.542	8.9516	9.5036	10.229	10.474	10.802	11.61	11.978	12.476	12.739	13.277	13.46	14.075	14.594	15.085
0.49364	1.0008	1.4917	2.035	2.6411	3.1238	3.4438	4.1349	4.6313	4.954	5.4292	6.0498	6.7031	7.2553	7.3522	8.0932	8.5018	9.0351	9.6342	10.093	10.428	10.817	11.544	12.148	12.389	12.686	13.241	13.589	14.113	14.555	14.947
0.47558	0.98024	1.5505	2.0404	2.6538	3.0122	3.4664	4.1433	4.6223	5.0012	5.5905	5.9011	6.5554	7.2553	7.4745	8.0286	8.5152	8.9933	9.7807	10.154	10.413	10.817	11.494	12.251	12.424	12.633	12.988	13.644	14	14.574	15.145
0.48353	0.99394	1.5232	2.1006	2.6221	3.0677	3.4814	4.1265	4.5416	5.0107	5.6109	5.9858	6.5667	7.2795	7.4622	8.0157	8.5018	9.0351	9.7073	10.048	10.321	10.944	11.494	12.114	12.511	12.616	13.423	13.496	13.962	14.633	15.026
0.49364	0.97683	1.5232	1.9866	2.6475	3.033	3.4966	4.1349	4.5953	4.9164	5.5702	5.9751	6.578	7.34	7.4499	7.99	8.4616	9.091	9.6634	10.154	10.428	10.96	11.445	12.029	12.337	12.686	13.478	13.405	13.962	14.809	15.026
0.49568	0.92339	1.5643	2.035	2.5717	3.0538	3.489	4.1265	4.5595	4.9634	5.5297	5.9858	6.4992	7.2072	7.4376	7.9387	8.4884	9.049	9.5181	10.154	10.536	10.912	11.527	12.165	12.528	12.881	13.168	13.515	14.037	14.711	15.105
0.50393	0.96328	1.5232	2.2301	2.6923	3.0677	3.489	4.0514	4.6403	5.0107	5.5499	6.0927	6.5667	7.2312	7.4991	7.8876	8.542	9.0211	9.4748	10.154	10.536	11.024	11.626	12.114	12.389	12.546	12.988	13.478	13.981	14.711	15.085
0.48353	0.9532	1.5277	2.0026	2.5654	3.0538	3.5117	4.1013	4.6947	5.0487	5.6007	5.9645	6.5216	7.2192	7.6729	8.0286	8.4483	9.1613	9.5325	10.26	10.567	11.008	11.56	12.029	12.32	12.546	13.078	13.441	13.962	14.691	15.066
0.48755	0.99739	1.5323	2.1507	2.6094	3.0747	3.5727	4.1097	4.4883	4.954	5.5803	5.9433	6.4879	7.2915	7.3765	7.9515	8.4483	9.1895	9.6342	10.351	10.614	11.152	11.088	12.097	12.355	11.643	13.06	13.423	14.056	14.633	15.026
0.49364	1.0358	1.5232	2.0677	2.6411	3.0191	3.489	4.1181	4.5863	5.0202	5.56	6.0071	6.6917	7.2072	7.5361	8.0157	8.475	9.049	9.6926	10.063	10.474	11.168	11.412	12.029	12.389	12.616	13.186	13.441	14.208	14.652	15.085
0.4916	1.0253	1.5232	1.9973	2.6031	3.033	3.489	4.1097	4.5684	5.0392	5.7134	5.9222	6.5554	7.2192	7.5609	8.0803	8.3552	8.8687	9.576	10.123	10.552	11.136	11.544	11.961	12.406	12.757	13.241	13.405	13.962	14.555	15.085
0.47361	0.97343	1.5323	2.0622	2.6157	2.9847	3.5041	4.1349	4.6133	4.954	5.5398	5.9116	6.578	7.1712	7.4132	7.9771	9.5905	9.0072	9.4604	10.048	10.552	11.088	11.494	11.944	12.337	12.81	13.259	13.295	13.924	14.497	15.125
0.49364	1.0043	1.5551	2.035	2.6602	3.0122	3.5804	4.1685	4.6765	5.0012	5.5398	5.9858	6.612	7.1354	7.7608	8.0286	8.6094	8.9794	9.547	10.063	10.552	10.96	11.445	11.978	12.337	12.774	13.313	13.405	14	14.477	15.105
0.48153	1.0008	1.5643	2.1173	2.6347	3.033	3.5193	4.2024	4.5327	4.9917	5.3596	5.9751	6.6233	7.1473	7.623	7.9387	8.542	8.8963	9.5615	10.214	10.567	11.072	11.445	12.012	12.441	12.845	13.186	13.626	13.924	14.458	15.026
0.48957	0.98365	1.5967	2.0296	2.7052	3.0887	3.5498	4.1433	4.6223	4.9445	5.4093	5.9858	6.578	7.1832	7.5114	7.8748	8.4884	8.9516	9.5615	10.063	10.614	11.088	11.445	12.268	12.616	12.845	13.259	13.35	13.943	14.439	15.026
0.49773	0.99394	1.5414	2.0731	2.7246	3.026	3.5269	4.1181	4.6043	4.9728	5.5499	5.9964	6.646	7.1473	7.5361	7.9643	8.4616	8.9377	9.6488	10.275	10.567	11.185	11.527	11.927	12.424	12.899	13.241	13.295	13.906	14.516	15.105
0.49568	0.99394	1.5597	2.0951	2.6602	3.0538	3.565	4.2194	4.6133	4.9823	5.5702	6.0071	6.5893	7.2072	7.2674	8.0157	8.5286	8.9101	9.6051	10.199	10.629	11.12	11.478	12.046	12.476	12.863	13.114	13.35	13.962	14.419	15.185
0.5102	0.99739	1.5551	2.0677	2.6538	3.1097	3.4966	4.1349	4.4972	4.9823	5.3497	6.0071	6.6233	7.2674	7.4499	7.9131	8.5824	9.0211	9.6488	10.078	10.598	11.12	11.478	11.978	12.581	12.792	13.078	13.313	13.981	14.477	15.386
0.48957	0.99739	1.5277	2.0567	2.6157	3.0957	3.4814	4.1097	4.6223	4.8047	5.5803	6.0177	6.6006	7.2433	7.4499	8.1192	8.6229	9.0211	9.6342	10.244	10.661	11.136	11.494	12.165	12.757	12.881	12.917	13.386	13.981	14.535	15.105
0.4916	0.99394	1.5277	2.1117	2.6031	3.0817	3.4966	4.0846	4.6223	4.9728	5.3695	5.8277	6.5893	7.3158	7.4991	8.0415	8.6364	8.8963	9.5905	10.169	10.707	11.136	11.61	11.944	12.528	12.828	12.845	13.423	13.981	14.711	15.265
0.48957	1.0113	1.5277	2.0731	2.5905	3.0817	3.5269	4.0846	4.6494	4.9445	5.4994	5.9433	6.6006	7.2312	7.4745	7.9643	8.5555	8.8824	9.6488	10.108	10.598	11.072	11.676	11.911	12.389	12.988	12.774	13.386	13.906	14.574	15.306
0.48554	0.98707	1.5505	2.0567	2.6411	3.0538	3.5193	4.1433	4.6133	5.0107	5.4292	5.9858	6.5554	7.1712	7.4991	7.9387	8.5286	8.9377	9.678	10.244	10.598	11.12	11.544	11.86	12.476	12.792	13.006	13.46	13.962	14.535	15.145
0.52723	0.9905	1.5459	2.1062	2.5968	3.0468	3.5345	4.1265	4.5863	5.0487	5.4994	6.0284	6.6006	7.1712	7.4868	7.9131	8.5689	8.8687	9.678	10.108	10.598	11.233	11.61	11.944	12.511	12.97	12.863	13.368	13.981	14.535	15.285
0.49568	0.98707	1.5277	2.0896	2.6157	3.0607	3.4438	4.068	4.6856	5.0392	5.4692	5.9964	6.5667	7.2072	7.5361	7.9515	8.5286	8.9101	9.6051	10.199	10.397	11.347	11.693	11.911	12.581	12.988	12.917	13.405	13.906	14.477	15.125
0.48957	0.99739	1.5187	2.0622	2.5968	3.0957	3.5193	4.1013	4.5684	5.0297	5.5297	5.9858	6.6006	7.3279	7.3765	8.0932	8.6229	8.8963	9.5905	10.382	10.598	11.233	11.709	12.063	12.424	12.935	13.006	13.368	14.151	15.066	15.265
0.50393	0.98024	1.5368	2.1117	2.6157	3.0957	3.5574	4.0763	4.5953	5.0582	5.5095	5.9858	6.5667	7.2795	7.4376	8.0028	8.5018	9.0351	9.5036	10.336	10.833	11.152	11.626	11.911	12.686	12.988	13.096	13.423	14.019	14.691	15.085
0.49979	0.99394	1.5368	2.0786	2.5968	3.1027	3.4966	4.1601	4.6403	4.9728	5.4692	5.9539	6.5893	7.1712	7.4745	8.0932	8.5152	8.7589	9.576	10.321	10.367	11.104	11.693	11.911	12.598	13.078	12.97	13.35	13.663	14.809	15.185
0.48957	1.0043	1.4873	2.0841	2.5654	3.033	3.6112	4.2024	4.6043	4.907	5.4994	6.0498	6.4879	7.1116	7.3765	8.0415	8.5152	8.9101	9.6342	10.244	10.443	11.12	11.643	11.995	12.686	13.024	13.024	13.441	13.756	14.633	15.205
0.4916	1.0008	1.5643	2.1062	2.5281	3.0817	3.5804	4.1685	4.5238	5.0582	5.5499	6.1035	6.578	7.2674	7.6729	8.0157	8.4884	8.9794	9.7807	10.229	10.397	11.12	11.643	12.012	12.581	12.863	13.15	13.46	13.7	14.574	15.386
0.51865	0.9905	1.6014	2.0731	2.578	3.0957	3.5881	4.1433	4.6133	5.0773	5.4793	6.1142	6.7605	7.2553	7.4991	8.0286	8.5689	8.9933	9.6926	10.336	10.459	11.185	11.593	11.978	12.633	13.06	13.078	13.478	13.831	14.868	15.145
0.49364	0.98365	1.5551	2.0841	2.578	3.0957	3.565	4.1097	4.6223	4.879	5.4692	6.1035	6.5554	7.1593	7.4991	7.9771	8.5286	8.9655	9.6926	10.336	10.244	11.088	11.626	11.944	12.546	13.006	13.078	13.441	13.774	14.672	15.225
0.50186	0.96666	1.5414	2.0458	2.5654	3.0677	3.5957	4.1349	4.5327	4.907	5.4893	6.082	6.5554	7.2674	7.5609	8.0028	8.5959	9.0351	9.6342	10.275	10.707	11.056	11.593	11.961	12.441	13.078	13.096	13.57	13.552	14.516	15.085
0.49364	0.9905	1.4784	2.0841	2.5343	3.0607	3.6889	4.0846	4.7038	5.0297	5.5297	6.19	6.5554	7.4132	7.3765	7.99	8.5824	9.077	9.6342	10.244	10.382	11.024	11.593	12.012	12.08	13.096	13.259	13.774	13.849	14.613	14.966
0.48957	0.98707	1.5277	2.0786	2.5717	3.0468	3.6112	4.1181	4.7038	5.0202	5.6007	6.1791	6.6233	7.34	7.5114	8.0028	8.475	9.0072	9.6634	10.229	10.443	11.072	11.659	11.961	12.633	13.06	13.277	13.277	13.793	14.555	15.306
0.48554	1.0078	1.5368	2.0841	2.6347	3.0747	3.5421	4.1517	4.5863	5.0487	5.5297	6.2445	6.4767	7.0759	7.4868	7.9131	8.4216	9.091	9.6051	10.336	10.598	11.024	11.577	11.927	12.268	12.899	13.295	13.57	13.887	14.75	15.306
0.5081	0.98707	1.5368	2.0296	2.5905	3.0677	3.4966	4.1181	4.6133	5.0297	5.5195	6.2336	6.4992	7.2312	7.5361	8.1452	8.4083	9.1191	9.446	10.033	10.536	11.024	11.61	11.961	12.459	13.06	13.277	13.496	14.037	14.535	15.306
0.49568	1.0429	1.5643	2.0296	2.6347	3.0607	3.5498	4.2364	4.5684	4.954	5.5803	6.0391	6.4879	7.1473	7.4745	7.9515	8.5152	9.1613	9.6342	10.214	10.521	10.802	11.659	12.097	12.441	13.006	13.259	13.57	13.756	14.458	14.907
0.5123	0.99739	1.4962	2.0841	2.6031	2.9847	3.5727	4.1517	4.6043	4.9634	5.6211	6.0927	6.3876	7.2192	7.4991	7.8748	8.5286	9.1191	9.4604	10.428	10.49	11.088	11.61	11.927	12.633	12.988	13.186	13.222	13.737	14.458	15.366
0.4916	1.0043	1.6724	2.0786	2.6221	3.0122	3.5727	4.1097	4.5327	4.954	5.662	6.0712	6.8182	7.3037	7.5609	7.9259	8.5152	9.0351	9.678	10.428	10.614	10.96	11.56	11.944	12.616	13.024	13.222	13.57	13.887	14.535	15.145
0.47165	1.0147	1.5597	2.0404	2.5968	2.9437	3.5804	4.177	4.5863	5.0392	5.6517	6.0071	6.5104	7.1832	7.5238	7.8621	8.5286	8.9933	9.7513	10.29	10.397	10.96	11.527	11.978	12.493	12.952	13.204	13.496	13.887	14.497	15.085
0.47558	0.97004	1.5368	2.0841	2.6475	2.9985	3.565	4.1097	4.5684	4.9917	5.6313	5.9751	6.5893	7.2312	7.5485	7.8748	8.5152	9.049	9.7513	10.169	10.367	11.04	11.511	12.063	12.406	13.042	13.313	13.441	13.981	14.574	15.046
0.5081	1.0078	1.5187	2.0567	2.6031	3.0122	3.5345	4.2194	4.5774	4.9728	5.6109	5.9645	6.646	7.1952	7.623	7.9643	8.5286	9.1472	9.7073	10.351	10.351	11.104	11.593	12.165	12.406	12.863	13.186	13.024	13.812	14.381	15.346
0.47558	0.96328	1.5597	2.0896	2.6221	3.0538	3.5345	4.1097	4.5774	5.0582	5.5499	6.0284	6.6233	7.2433	7.4868	7.9771	8.542	9.0072	9.6634	10.382	10.443	11.024	11.461	12.182	12.511	13.078	13.132	13.277	13.793	14.809	15.306
0.50601	0.99739	1.4962	2.0786	2.5158	3.0538	3.5498	4.1349	4.6043	5.0487	5.5905	6.0712	6.4879	7.2433	7.4868	8.0157	8.542	9.0211	9.6634	10.244	10.459	10.944	11.461	12.234	12.424	12.881	13.186	13.496	14.094	14.477	15.225
0.52508	1.0043	1.5459	2.0731	2.6157	2.9847	3.5193	4.1097	4.6043	5.0202	5.5905	5.9858	6.612	7.0286	7.4622	7.9771	8.435	9.105	9.7219	10.078	10.505	10.944	11.445	12.165	12.441	12.97	12.97	13.496	14.151	14.555	14.966
0.48153	0.99739	1.6061	2.0951	2.5905	3.0122	3.5498	4.1265	4.6133	5.0965	5.6007	5.9645	6.6006	7.1593	7.4868	7.9771	8.4616	9.0211	9.7073	10.244	10.661	10.96	11.494	12.131	12.389	12.704	13.06	13.515	14.056	14.691	15.205
0.49364	0.99394	1.5323	2.0841	2.6094	2.9916	3.489	4.1181	4.5416	5.1157	5.5398	5.9539	6.5893	7.1832	7.3765	7.9643	8.6364	9.049	9.6051	10.229	10.459	10.865	11.363	12.2	12.355	12.721	12.988	13.552	13.868	14.555	15.185
0.49364	1.0078	1.5232	2.1173	2.6602	3.0468	3.5498	4.1517	4.6947	5.0869	5.4692	5.9539	6.6006	7.1354	7.4868	8.0028	8.4616	9.1191	9.6196	10.184	10.536	10.976	11.347	12.063	12.546	12.917	13.096	13.515	14.075	14.419	15.105
0.48554	0.99739	1.5187	2.1006	2.5654	3.0399	3.5421	4.1349	4.6494	5.0107	5.5702	6.0712	6.5893	7.1235	7.4376	7.99	8.542	9.105	9.6051	10.184	10.336	11.024	11.33	12.32	12.441	12.757	13.168	13.533	13.831	14.652	15.326
0.49773	0.98707	1.4828	2.0951	2.5592	3.0122	3.489	4.1097	4.5684	5.0297	5.4994	5.9964	6.5554	7.1712	7.5857	7.99	8.5824	9.0351	9.6342	10.154	10.645	10.912	11.527	12.08	12.389	12.81	13.15	13.515	13.46	14.613	15.185
0.4916	1.0008	1.5187	2.0404	2.6094	3.0122	3.5804	4.1433	4.6494	4.9728	5.4592	5.7756	6.5329	7.2072	7.5238	7.9387	8.4884	9.049	9.5181	10.123	10.336	10.944	11.643	12.114	12.546	12.757	12.988	13.57	13.719	14.535	15.245
0.49979	0.98707	1.5368	2.0513	2.5467	3.033	3.5269	4.1349	4.6313	5.0202	5.3894	5.9539	6.5441	7.1952	7.5238	7.9003	8.4616	8.9655	9.5181	10.138	10.583	10.992	11.626	11.944	12.511	13.132	13.078	13.46	13.868	14.711	15.085
0.48554	0.98707	1.5142	2.0731	2.6157	3.0053	3.6112	4.1939	4.6133	4.9728	5.3794	5.9858	6.4992	7.0641	7.4254	7.99	8.5689	8.9377	9.5036	10.078	10.536	11.088	11.461	11.826	12.459	12.845	13.078	13.295	13.793	14.927	15.105
0.50393	0.99739	1.5142	2.0242	2.6475	2.971	3.6266	4.0266	4.6223	5.0202	5.4492	5.8696	6.6006	7.1116	7.5733	7.9387	8.4884	8.9794	9.5036	10.093	10.645	11.201	11.511	12.2	12.528	12.828	13.15	13.441	13.887	14.574	15.185
0.5081	0.97343	1.5323	2.0896	2.6221	3.0607	3.4966	4.1265	4.5953	5.0107	5.4392	5.9011	6.5329	7.0878	7.4991	8.0544	8.5286	9.1191	9.4604	10.336	10.614	11.04	11.793	12.234	12.441	12.917	13.204	13.441	13.887	14.633	15.165
0.49979	0.98365	1.5368	2.0134	2.5842	3.0887	3.5727	4.245	4.6223	4.9917	5.4192	5.8906	6.6347	7.1712	7.4868	8.2104	8.4083	9.1191	9.5181	10.244	10.521	10.976	11.593	11.995	12.389	12.528	13.096	13.423	13.812	14.477	14.711
0.4916	1.0043	1.5142	2.1117	2.6094	3.0607	3.565	4.1601	4.6765	4.9917	5.4492	5.9751	6.6688	7.2433	7.4376	8.0415	8.5018	8.9794	9.3742	10.367	10.49	10.96	11.265	12.114	12.424	12.739	13.042	13.405	14	14.477	15.085
0.49364	0.97004	1.5232	2.1006	2.6923	3.0538	3.5269	4.1517	4.6494	5.0869	5.3993	5.9964	6.5893	7.1354	7.5238	8.0544	8.4083	8.8549	9.446	10.244	10.413	11.072	11.61	12.012	12.372	12.721	12.917	13.46	13.924	14.574	15.427
0.48554	0.99739	1.5643	2.0677	2.578	3.0747	3.4814	4.093	4.5953	4.9917	5.5095	5.9222	6.4767	7.1473	7.4991	7.9771	8.3156	8.9794	9.5905	10.275	10.598	10.849	11.544	11.978	12.441	12.774	12.881	13.441	14.113	14.555	15.366
0.48353	0.98024	1.5368	2.1006	2.5717	3.0607	3.4814	4.0846	4.5595	4.9917	5.5095	5.9328	6.5893	7.1235	7.5857	7.9003	8.2892	8.8963	9.5905	10.169	10.275	10.944	11.412	12.012	12.476	12.899	12.704	13.496	14.037	14.516	15.165
0.48353	0.98024	1.5142	2.0567	2.5654	3.0817	3.489	4.1433	4.4707	4.9634	5.3993	5.9116	6.578	7.1593	7.5857	7.9131	8.3288	8.8549	9.5181	10.229	10.629	10.992	11.659	12.029	12.493	12.669	12.935	13.386	14	14.497	15.386
0.47954	0.98365	1.4828	2.0841	2.5968	3.0677	3.5117	4.068	4.5953	5.0297	5.4492	5.9222	6.5554	7.2312	7.6604	7.99	8.3552	8.9239	9.547	10.093	10.521	10.865	11.995	11.978	12.598	12.774	12.845	13.295	14.075	14.516	15.006
0.48554	0.99739	1.4917	2.0677	2.6602	3.026	3.5345	4.1517	4.5953	4.9164	5.3894	5.9011	6.5667	7.1473	7.6355	7.9515	8.4083	8.7999	9.5181	10.169	10.552	10.96	11.61	12.063	12.563	12.739	12.881	13.35	13.981	14.535	15.066
0.49364	0.98707	1.5142	2.0513	2.6221	3.033	3.5345	4.1097	4.5327	4.8511	5.56	5.9433	6.5216	7.2433	7.6355	8.0544	8.4216	8.8687	9.5615	10.184	10.567	10.928	11.544	12.063	12.493	12.721	12.97	13.405	13.906	14.652	15.026
0.49773	0.99739	1.5781	2.0951	2.5717	2.9369	3.5041	4.1097	4.4355	4.9634	5.56	5.9645	6.5216	7.1593	7.623	8.0544	8.475	8.8824	9.6488	10.138	10.552	10.865	11.56	11.877	12.563	12.511	13.006	13.386	13.981	14.769	15.205
0.48755	0.9905	1.5232	2.0841	2.7376	2.9779	3.5269	4.1097	4.5327	4.8883	5.4893	6.0391	6.5554	7.2192	7.6604	8.0932	8.4616	8.8411	9.678	10.214	10.505	11.056	11.577	12.046	12.651	12.704	13.024	13.46	14.075	14.73	15.265
0.4916	1.0147	1.5052	2.0622	2.6347	2.9369	3.5421	4.1939	4.4883	4.9258	5.4994	5.9858	6.6233	7.2192	7.6479	8.1062	8.5018	8.8824	9.6196	10.184	10.459	10.976	11.743	11.911	12.546	12.739	13.204	13.515	14.019	14.323	15.165
0.4916	0.99739	1.5505	2.1006	2.6094	3.0957	3.5193	4.1097	4.5061	4.8604	5.4994	5.9222	6.5441	7.1354	7.5857	8.0803	8.4884	8.8824	9.6196	10.275	10.598	11.008	11.626	11.944	12.476	12.792	13.132	13.295	13.962	14.497	15.245
0.48554	0.96328	1.4784	2.1228	2.7052	3.0607	3.4966	4.0597	4.5684	4.9352	5.4592	6.0284	6.4992	7.0759	7.5981	8.0932	8.4483	8.8411	9.6634	10.275	10.614	10.976	11.544	11.826	12.528	12.792	13.06	13.515	14.037	14.419	15.165
0.48957	0.99394	1.5414	2.0841	2.5842	3.0468	3.5345	4.1517	4.5416	4.9164	5.4893	6.0284	6.5104	7.0878	7.4499	8.0157	8.4216	9.0072	9.7807	10.229	10.754	11.072	11.478	11.911	12.546	12.739	12.899	13.57	13.868	14.266	15.105
0.4916	1.0253	1.5277	2.035	2.6094	2.9916	3.5727	4.093	4.5684	4.9352	5.4793	6.1035	6.4209	7.2674	7.4622	7.99	8.395	8.8687	9.7807	10.123	10.583	10.912	11.593	11.944	12.459	12.792	13.313	13.607	13.906	14.247	15.066
0.4916	1.0113	1.4962	2.0951	2.5467	3.0053	3.4739	4.177	4.5863	4.9352	5.4994	6.0927	6.4992	7.2192	7.4991	7.9131	8.3288	8.9101	9.7073	10.123	10.629	10.912	11.593	12.029	12.476	12.739	12.845	13.589	13.774	14.189	15.105
0.51865	1.0182	1.5368	2.1173	2.5592	3.0887	3.5041	4.0514	4.6765	4.954	5.4492	6.1358	6.5329	7.1593	7.5857	7.9259	8.4483	9.0211	9.5615	10.033	10.614	10.865	11.527	12.114	12.424	12.669	13.241	13.533	13.943	14.285	14.986
0.49568	1.0113	1.5097	2.1006	2.6157	3.1097	3.5421	4.0846	4.6675	4.9917	5.4793	5.9751	6.646	7.2553	7.5609	8.0028	8.3156	8.9655	9.6342	10.078	10.614	11.008	11.511	12.148	12.476	12.686	13.295	13.46	13.943	14.342	15.165
0.48957	1.0078	1.5414	2.1395	2.6538	2.9916	3.5345	4.1685	4.6584	4.8511	5.5095	6.082	6.7031	7.1116	7.5733	7.9771	8.4483	9.063	9.6196	10.078	10.707	11.072	11.577	12.114	12.459	12.669	13.114	13.533	13.831	14.477	15.085
0.48957	0.99739	1.5277	2.1062	2.6538	3.0468	3.565	4.1097	4.5061	4.9164	5.5499	6.082	6.6233	7.1354	7.4991	7.9771	8.435	8.9516	9.678	10.138	10.598	11.04	11.494	12.217	12.268	12.792	13.042	13.644	13.793	14.516	14.986
0.49568	0.9905	1.5232	2.0841	2.6284	3.026	3.5345	4.0597	4.4883	5.0487	5.5803	6.0284	6.646	7.1473	7.4991	7.8876	8.4884	9.0072	9.6342	10.018	10.49	10.897	11.461	12.08	12.251	12.81	13.096	13.277	13.831	14.516	15.006
0.50186	1.0043	1.5459	1.9973	2.6031	3.0399	3.4966	4.093	4.5684	5.0487	5.5195	6.0177	6.612	7.0997	7.5485	7.9003	8.3685	8.9655	9.678	10.033	10.459	10.897	11.363	12.131	12.389	12.721	13.024	13.313	13.962	14.516	15.046
0.49568	0.98024	1.5459	2.0786	2.6157	3.026	3.5041	4.1433	4.5684	5.0297	5.56	5.8696	6.5893	7.1473	7.4254	7.99	8.395	8.8411	9.5615	10.018	10.552	10.881	11.494	12.114	12.493	12.739	13.006	13.313	13.663	14.516	15.306
0.48755	0.97683	1.5505	2.0951	2.6221	3.0468	3.4966	4.1097	4.5953	5.0678	5.4692	5.8591	6.5441	7.1593	7.4376	7.9387	8.5152	8.9101	9.6342	10.063	10.583	11.008	11.527	12.148	12.389	12.739	13.132	13.313	13.849	14.75	15.326
0.48755	0.97004	1.5597	2.0896	2.5717	3.0538	3.4966	4.1433	4.5684	4.9917	5.4893	6.082	6.5329	7.1952	7.3765	7.9771	8.4616	8.8274	9.6926	10.048	10.521	10.897	11.776	12.182	12.459	12.511	13.132	13.332	13.943	14.535	15.306
0.5123	0.98365	1.5459	2.1006	2.6031	3.0468	3.4739	4.177	4.6313	5.0678	5.4692	6.0391	6.5104	7.1832	7.3765	7.9515	8.5152	8.9239	9.7366	9.9585	10.397	10.897	11.577	12.148	12.511	12.792	13.15	13.478	13.793	14.439	15.285
0.48353	0.99394	1.5368	2.1006	2.6031	3.0399	3.3916	4.2194	4.6043	5.0202	5.5499	5.9751	6.6006	7.2072	7.34	7.8621	8.5152	9.0211	9.5325	10.033	10.521	10.897	11.461	12.029	12.528	12.899	13.096	13.478	13.831	14.516	15.205
0.48353	0.95991	1.5828	2.0567	2.6157	3.0191	3.4438	4.1013	4.5505	5.0582	5.5905	6.0177	6.6233	7.2433	7.2312	7.9003	8.3156	9.1613	9.4892	10.018	10.336	11.136	11.743	11.978	12.493	12.988	13.006	13.423	13.793	14.613	15.225
0.48957	0.96328	1.5735	2.0458	2.6157	3.0053	3.5041	4.1939	4.5863	5.0487	5.3201	6.0498	6.612	7.3037	7.2795	8.0286	8.475	8.9794	9.678	10.063	10.413	10.976	11.61	12.063	12.459	12.686	13.042	13.552	13.906	14.691	15.185
0.48554	0.94986	1.5597	2.0841	2.5842	3.0747	3.4966	4.1601	4.6403	4.9917	5.5195	6.0177	6.6688	7.3279	7.3644	8.0286	8.6907	8.5689	9.576	10.123	10.474	10.976	11.776	12.114	12.493	13.024	13.114	13.441	13.887	14.672	15.225
0.48353	0.96666	1.5277	2.0567	2.6284	3.033	3.5041	4.093	4.6494	5.0012	5.4994	6.0712	6.7146	7.2553	7.3037	8.0415	8.3818	8.9655	9.5181	10.018	10.49	11.024	11.544	12.131	12.303	13.114	13.096	13.313	13.756	14.672	15.205
0.48153	0.97683	1.4917	2.0458	2.6031	3.0817	3.5345	4.0597	4.7038	5.0869	5.5297	6.0927	6.7031	7.1712	7.3644	8.0544	8.3818	8.7999	9.4316	10.184	10.49	10.912	11.445	12.097	12.372	13.06	13.114	13.533	13.924	14.828	15.205
0.4916	0.98707	1.5232	2.0026	2.5467	3.0887	3.5345	4.0018	4.5684	5.0392	5.5095	6.1575	6.6347	7.1952	7.4132	8.0028	8.4216	8.9655	9.5615	10.108	10.707	10.976	11.544	12.029	12.424	12.899	13.006	13.719	14.094	14.828	15.245
0.48957	0.97683	1.4962	2.0786	2.6221	3.0399	3.5574	4.1097	4.5684	5.0202	5.5803	6.1683	6.6802	7.1354	7.4622	8.0544	8.4616	8.9377	9.678	10.093	10.598	11.008	11.56	12.114	12.389	12.899	12.774	13.478	13.962	14.691	15.285
0.48153	0.9905	1.5277	2.0677	2.5592	3.0677	3.5498	4.0763	4.5953	4.9728	5.4692	6.1791	6.6688	7.0523	7.4745	8.1582	8.4884	8.9516	9.6196	10.214	10.521	11.04	11.643	12.182	12.581	12.845	13.042	13.35	14.113	14.691	15.085
0.48957	0.99739	1.5007	2.0513	2.5905	3.0887	3.5804	4.0431	4.6223	5.0678	5.4192	6.125	6.6917	7.2795	7.4991	8.1712	8.475	9.1191	9.6634	10.26	10.614	11.088	11.826	11.944	12.581	12.988	13.006	13.35	13.981	14.711	15.205
0.48153	0.99739	1.5007	2.035	2.5592	3.0053	3.6112	4.093	4.6223	4.9352	5.4192	6.1142	6.6574	7.1354	7.5485	8.0673	8.435	8.9239	9.6342	10.229	10.552	11.152	11.826	12.2	12.459	12.845	13.042	13.515	14.056	14.947	15.185
0.48755	0.9432	1.5007	2.0951	2.5467	3.0399	3.5727	4.1349	4.5774	5.0297	5.4492	6.0927	6.5104	7.0168	7.4622	8.0803	8.4216	9.063	9.547	10.29	10.645	11.072	11.676	12.029	12.511	12.757	13.06	13.423	14.019	14.947	15.066
0.48554	0.95991	1.5187	2.0731	2.578	3.1097	3.565	4.1181	4.6313	5.0392	5.271	5.8696	6.5893	7.1116	7.4868	8.3288	8.475	8.9101	9.6051	10.336	10.583	11.04	11.56	12.165	12.598	12.899	13.006	13.35	14.019	14.966	14.966
0.4916	0.94652	1.5232	2.0513	2.6094	3.0677	3.5804	4.1517	4.6043	4.9728	5.4492	6.082	6.5893	7.0168	7.5609	8.0544	8.6907	9.077	9.6342	10.367	10.413	10.976	11.527	12.063	12.476	12.792	13.06	13.313	13.981	14.848	15.105
0.48153	0.96328	1.4962	2.0677	2.6157	2.9437	3.5421	4.1517	4.5416	5.0297	5.4392	6.082	6.646	7.1952	7.4622	8.0415	8.475	8.9933	9.766	10.321	10.367	10.833	11.577	12.08	12.598	12.81	13.006	13.35	13.774	14.789	15.046
0.48957	0.99739	1.5052	2.0567	2.5654	3.026	3.6112	4.1601	4.7404	4.9728	5.4492	6.0712	6.772	7.2192	7.4745	8.0932	8.4216	8.9655	9.547	10.018	10.505	11.008	11.544	11.995	12.546	12.774	13.168	13.35	13.774	14.809	15.026
0.49364	0.98707	1.5052	2.0404	2.6031	3.0122	3.6112	4.1685	4.5505	4.9823	5.4392	6.0391	6.5667	7.2192	7.4991	8.1062	8.475	8.9655	9.5325	10.138	10.552	11.024	11.61	12.029	12.182	12.881	12.935	13.478	13.663	14.75	15.026
0.5102	0.98024	1.5368	2.0677	2.553	3.0399	3.5041	4.177	4.6403	4.9823	5.4492	6.0391	6.5893	7.2072	7.4991	8.1062	8.5555	8.9655	9.6051	10.093	10.567	10.992	11.56	12.046	12.546	12.721	13.277	13.607	13.906	14.828	15.026
0.5081	0.93988	1.5689	2.0841	2.5343	3.033	3.5727	4.2194	4.5774	4.9634	5.4592	6.0605	6.5329	7.2915	7.5485	8.0286	8.5824	9.0072	9.5615	10.169	10.49	11.024	11.314	11.978	11.961	12.739	13.168	13.552	13.793	14.711	14.868
0.49979	0.95656	1.5781	2.0731	2.553	3.0538	3.5345	4.1517	4.6043	5.0012	5.4793	6.1035	6.3765	7.2312	7.4745	8.0286	8.5555	8.9377	9.8249	10.048	10.336	10.944	11.363	11.978	12.616	12.651	12.97	13.405	13.924	14.672	15.026
0.49979	0.99739	1.5368	2.0841	2.578	3.0817	3.5574	4.1601	4.6494	5.0012	5.4692	6.082	6.6347	7.2553	7.4622	8.1062	8.4616	9.0072	9.6342	10.093	10.428	10.881	11.412	12.046	12.32	12.774	13.186	13.386	13.962	14.789	14.947
0.51441	0.98707	1.5277	2.0242	2.6094	3.0053	3.565	4.2109	4.6313	5.0869	5.4994	6.0712	6.612	7.2072	7.34	8.1712	8.5286	8.9794	9.5905	10.184	10.428	11.056	11.56	12.063	12.863	12.881	13.15	13.589	13.962	14.769	15.006
0.49364	1.0898	1.5232	2.0458	2.5842	3.0887	3.5574	4.245	4.5595	5.0202	5.4893	6.0177	6.4992	7.1354	7.4622	8.1974	8.542	8.8963	9.678	9.9734	10.428	10.96	11.577	12.08	12.774	12.935	13.096	13.478	13.887	14.691	15.105
0.50393	0.97683	1.5142	2.0458	2.5654	3.0191	3.5574	4.1855	4.5953	4.9728	5.4994	6.0605	6.5893	7.1473	7.5238	8.0157	8.7043	9.091	9.6051	10.078	10.505	10.944	11.659	12.182	12.633	12.97	12.97	13.626	13.793	14.868	14.868
0.49364	0.99394	1.5459	2.0786	2.5592	3.0053	3.5804	4.1433	4.6313	4.9445	5.5398	5.9964	6.646	7.1473	7.4499	7.9643	8.4083	9.091	9.5325	9.8249	10.505	11.024	11.544	12.08	12.459	12.917	12.97	13.386	13.812	14.516	14.868
0.48755	1.0253	1.5459	2.0458	2.5343	3.0607	3.5269	4.1433	4.5416	5.0487	5.4893	5.9858	6.7146	7.2553	7.4376	8.0415	8.395	9.077	9.5905	10.048	10.552	10.802	11.593	11.944	12.493	12.952	13.096	13.626	13.812	14.497	15.046
0.52508	0.94652	1.5232	2.0458	2.5717	3.0607	3.5727	4.1939	4.5595	4.9917	5.5195	6.1035	6.4767	7.3279	7.4622	7.9515	8.395	8.8549	9.6196	10.093	10.583	10.912	11.676	12.012	12.528	13.006	12.97	13.552	13.868	14.633	15.125
0.47361	0.99739	1.5232	2.0896	2.6347	3.0747	3.4739	4.1685	4.6947	5.1833	5.5195	6.0712	6.7375	7.1354	7.4499	8.0932	8.3685	9.105	9.6051	10.184	10.567	10.802	11.577	11.944	12.389	13.042	13.024	13.552	13.849	14.458	15.066
0.48554	1.0078	1.5459	2.0296	2.6858	3.0747	3.565	4.1685	4.6133	5.0107	5.56	6.0927	6.5329	7.1832	7.5361	8.1192	8.5555	8.8687	9.5615	10.26	10.629	10.817	11.659	11.995	12.651	12.988	13.006	13.478	13.943	14.594	15.046
0.5081	1.0113	1.5551	2.0951	2.6221	3.0747	3.6266	4.1013	4.5953	5.1157	5.5803	6.0605	6.5441	7.1832	7.1712	8.0932	8.5018	9.091	9.5615	10.184	10.505	11.04	11.709	12.131	12.546	12.988	12.988	13.46	13.962	14.477	15.026
0.5123	0.99394	1.5414	2.0841	2.6031	3.1168	3.5574	4.1517	4.4883	4.8977	5.4292	6.125	6.646	7.1593	7.5609	8.0932	8.3685	9.0351	9.5181	10.229	10.49	11.04	11.445	12.012	12.355	12.899	13.078	13.533	14.151	14.868	15.026
0.48755	0.98365	1.5414	2.0458	2.6284	3.1168	3.5193	4.1601	4.5684	5.0869	5.4893	6.0712	6.7031	7.1712	7.4622	8.0286	8.6229	9.1191	9.5181	9.9138	10.629	10.881	11.56	12.046	12.511	12.845	13.024	13.496	13.943	14.652	15.085
0.51865	1.0323	1.5551	2.0841	2.578	3.0468	3.5193	4.1013	4.6133	5.0297	5.4392	6.1035	6.5893	7.1116	7.4499	8.0028	8.4616	9.105	9.6634	10.184	10.536	10.96	11.626	11.944	12.546	12.881	13.06	13.607	14.075	14.652	15.006
0.50393	0.97343	1.5277	1.9973	2.6221	3.0607	3.5345	4.1517	4.6223	5.1833	5.5803	6.0071	6.578	7.1473	7.4991	8.0803	8.435	9.1754	9.5615	10.184	10.583	11.008	11.593	11.961	12.406	12.845	13.042	13.405	14.037	14.594	14.868
0.50601	0.99394	1.5414	2.0296	2.6031	3.0677	3.5574	4.068	4.6223	5.1253	5.4392	6.1035	6.6347	7.1593	7.0878	8.0673	8.2104	8.9377	9.7219	10.505	10.552	11.008	11.743	12.114	12.406	12.774	13.204	13.46	13.849	14.828	14.986
0.49979	0.98365	1.5187	2.1062	2.6031	3.0747	3.5193	4.068	4.6043	5.0012	5.4692	5.9858	6.6574	7.1473	7.4991	8.1843	8.5018	9.0351	9.7366	10.336	10.49	11.072	11.527	11.927	12.493	12.845	12.97	13.332	13.812	14.672	15.306
0.49773	1.0008	1.5459	2.0622	2.5905	3.0468	3.5193	4.0597	4.5774	5.2124	5.4893	6.0284	6.6574	7.0997	7.4868	8.0028	8.5959	9.0351	9.8397	10.214	10.552	10.992	11.511	12.217	12.511	12.792	13.168	13.405	13.868	14.439	15.105
0.49364	0.99394	1.5414	2.1062	2.6157	2.9779	3.489	4.1685	4.5863	5.0773	5.5499	5.88	6.6347	7.1712	7.5238	8.1974	8.5152	8.9655	9.6634	10.428	10.583	10.897	11.461	12.148	12.424	12.792	13.024	13.295	13.943	14.535	15.165
0.51653	0.98365	1.5323	2.0731	2.5717	2.9779	3.4513	4.1517	4.5863	5.0487	5.5702	5.9328	6.6233	7.0286	7.4991	8.0673	8.5555	8.9933	9.6488	10.093	10.567	10.944	11.511	12.148	12.251	12.863	13.024	13.277	13.812	14.362	15.225
0.49364	1.0008	1.5505	2.0786	2.6284	3.1027	3.5117	4.1517	4.4883	5.1446	5.5702	6.0391	6.6688	7.2192	7.5114	8.2235	8.5152	9.049	9.5325	10.199	10.505	11.088	11.759	12.251	12.493	12.739	13.096	13.35	13.868	14.477	15.205
0.48153	0.9905	1.5187	2.0841	2.6538	3.0053	3.6112	4.1265	4.6043	5.0869	5.4994	6.0391	6.6233	7.1354	7.5857	8.0415	8.5286	8.9933	9.6488	10.336	10.413	11.024	11.676	12.097	12.493	12.81	13.132	13.405	13.887	14.555	15.145
0.48554	0.9905	1.5597	2.1006	2.6157	3.033	3.4589	4.1939	4.5238	4.9823	5.4692	6.0391	6.6917	7.1235	7.623	7.8494	8.542	9.0211	9.8102	10.093	10.413	10.992	11.61	12.114	12.598	12.952	13.078	13.386	13.943	14.555	15.185
0.5102	1.0182	1.5505	2.1117	2.5968	3.0538	3.7676	4.1517	4.5863	5.0012	5.5095	6.0284	6.6802	7.3037	7.5485	8.1322	8.5152	9.0211	9.6342	10.123	10.536	10.992	11.527	12.029	12.476	12.739	13.114	13.386	13.906	14.555	15.406
0.4916	0.99394	1.5142	2.0567	2.578	3.0677	3.5957	4.2024	4.6494	5.0297	5.4192	6.0284	6.6233	7.1832	7.5361	8.0673	8.4884	9.1613	9.6488	10.048	10.336	11.072	11.445	12.097	12.581	12.917	13.042	13.295	13.906	14.304	15.245
0.50186	0.99394	1.6343	2.0731	2.5096	3.0191	3.5727	4.1097	4.5595	5.0107	5.5297	6.0071	6.6574	7.1473	7.3644	8.0415	8.395	9.1895	9.5325	10.184	10.505	11.088	11.478	12.148	12.459	12.757	12.792	13.386	13.906	14.769	15.006
0.49773	1.0147	1.4739	2.1117	2.5968	3.0122	3.4664	4.0597	4.5774	4.9917	5.4893	6.0284	6.6688	7.2072	7.5485	8.1192	8.3685	9.2744	9.6488	10.154	10.382	10.928	11.527	12.165	12.598	12.828	12.881	13.496	14.151	14.652	15.085
0.49364	0.97343	1.4962	2.0677	2.6031	3.0053	3.4814	4.1013	4.5774	5.0678	5.5702	6.0071	6.6574	7.1952	7.5485	8.0286	8.3685	9.2319	9.6342	10.26	10.459	10.849	11.544	12.097	12.616	12.704	12.935	13.368	13.924	14.75	15.026
0.49364	0.99739	1.4739	2.0731	2.5968	3.0122	3.5804	4.1265	4.5327	5.0107	5.5195	6.0071	6.5216	7.1235	7.4376	7.9771	8.3818	9.0351	9.5905	10.154	10.428	11.072	11.643	12.029	12.669	12.845	13.024	13.496	13.812	14.613	15.026
0.46387	0.99394	1.4475	2.0296	2.6157	3.0399	3.5421	4.1685	4.5953	4.9634	5.4994	6.0498	6.6688	7.2433	7.5733	7.9515	8.4884	8.9655	9.6342	10.138	10.552	11.072	11.659	12.148	12.633	12.581	13.024	13.496	14.056	14.769	15.085
0.49364	1.0043	1.5232	2.0677	2.6031	3.026	3.5117	4.1433	4.5327	5.0202	5.5195	6.0498	6.8298	7.2312	7.5981	8.1452	8.5824	9.077	9.5325	10.108	10.583	10.897	11.843	12.063	12.511	12.669	12.917	13.46	13.906	14.555	15.245
0.4916	0.98707	1.5414	2.0134	2.6411	3.033	3.5117	4.1265	4.5774	4.8697	5.56	6.1035	6.7146	7.2192	7.623	8.0415	8.5959	8.9516	9.547	10.154	10.397	11.024	11.726	12.063	12.285	12.406	13.096	13.423	14.037	14.497	15.006
0.5102	0.98707	1.5007	2.1006	2.6666	3.0817	3.5269	4.0846	4.5953	5.0487	5.5195	6.1466	6.646	7.2192	7.5114	7.9259	8.5152	8.9101	9.576	10.321	10.49	10.976	11.743	12.148	12.511	12.616	12.97	13.589	13.868	14.497	15.026
0.49773	0.98365	1.5007	2.1006	2.6284	3.1168	3.565	4.1433	4.6765	4.954	5.5095	6.0927	6.5216	7.2312	7.5114	7.9515	8.4483	8.9933	9.547	10.123	10.614	10.928	11.709	11.978	12.372	12.546	13.222	13.57	14	14.439	15.225
0.47558	0.98707	1.5505	2.0841	2.6538	3.0817	3.5117	4.0846	4.5238	4.9823	5.5499	5.9222	6.6688	7.2674	7.5485	7.9131	8.5689	8.9516	9.5325	10.413	10.536	11.04	11.726	12.131	12.546	12.651	13.35	13.515	13.924	14.516	15.006
0.50186	0.99739	1.5368	2.0513	2.6666	3.0399	3.5041	4.1181	4.6494	4.9728	5.4192	6.2336	6.5104	7.2192	7.4499	7.9387	8.5018	9.0211	9.446	10.229	10.49	10.77	11.544	12.097	12.493	12.616	13.259	13.626	13.868	14.458	15.145
0.49773	1.0113	1.5142	2.0951	2.5467	3.0607	3.5269	4.1433	4.5595	5.0582	5.4192	6.1035	6.612	7.2553	7.4622	8.0286	8.5555	9.0211	9.6196	10.275	10.397	10.96	11.593	12.046	12.217	12.581	13.168	13.46	13.962	14.497	15.026
0.46774	0.99739	1.5368	2.0951	2.6284	3.0607	3.5041	4.2364	4.5774	5.0202	5.4592	6.0177	6.5104	7.3765	7.4868	8.0673	8.5824	9.0211	9.5615	10.108	10.505	10.897	11.527	12.029	12.598	12.704	12.881	13.57	13.756	14.691	15.145
0.5102	1.0078	1.5323	2.1117	2.4363	3.0538	3.6889	4.0763	4.5774	5.0773	5.4994	6.0071	6.5441	7.3158	7.34	7.9643	8.5018	9.049	9.3886	9.899	10.676	10.944	11.593	12.029	12.476	12.669	12.845	13.57	13.831	14.594	15.285
0.48554	1.0113	1.5142	2.1173	2.5905	3.138	3.5574	4.1013	4.6043	4.9823	5.4492	6.0284	6.6347	7.2915	7.4745	8.1062	8.5152	9.049	9.4748	10.078	10.676	10.928	11.396	12.046	12.616	12.757	12.828	13.515	13.644	14.594	15.006
0.49568	0.95656	1.6249	2.0622	2.5281	3.0957	3.5193	4.1181	4.6043	4.9917	5.4692	6.1035	6.6802	7.2192	7.4499	8.1974	8.6094	9.1191	9.5036	10.063	10.552	10.992	11.56	12.029	12.669	12.863	12.863	13.589	13.719	14.633	15.026
0.48353	0.95656	1.4828	2.0513	2.5842	3.0468	3.5041	4.1601	4.5684	4.9445	5.4994	6.1035	6.6688	7.1712	7.4868	8.0803	8.7725	9.1191	9.5905	10.305	10.552	10.928	11.56	12.097	12.389	12.81	12.952	13.626	13.831	14.672	15.185
0.47755	0.97683	1.5187	2.0513	2.5219	3.0607	3.489	4.0846	4.5774	4.9634	5.4292	6.082	6.6574	7.1593	7.4991	8.0028	8.6771	9.077	9.6051	10.351	10.629	10.976	11.396	12.114	12.355	12.757	13.024	13.57	13.774	14.672	15.026
0.49773	1.0008	1.5142	2.0622	2.5654	3.0468	3.5117	4.1013	4.5863	4.9634	5.4994	6.1575	6.6233	7.0404	7.5114	8.1322	8.5959	9.0351	9.5181	10.275	10.521	10.865	11.461	12.234	12.493	12.739	12.988	13.533	13.756	14.672	15.205
0.4916	0.99739	1.5187	2.0731	2.6284	3.0677	3.5193	4.1517	4.5149	5.0012	5.4592	5.9964	6.5893	7.0759	7.4376	8.0157	8.6229	9.0072	9.6342	10.229	10.598	11.04	11.461	12.029	12.528	12.686	12.97	13.46	14	14.652	15.326
0.48755	1.0043	1.5232	2.1173	2.6157	3.0538	3.5498	4.0101	4.5061	5.0107	5.5398	5.9539	6.578	7.0759	7.1712	8.0803	8.5286	9.049	9.5615	10.093	10.567	11.008	11.249	12.012	12.581	12.669	12.952	13.405	13.756	14.986	15.006
0.48957	1.0113	1.5097	1.9973	2.5968	3.026	3.4513	4.1265	4.5774	5.0202	5.4893	6.0712	6.7031	7.0997	7.5114	8.0803	8.4483	9.077	9.6196	10.169	10.567	11.33	11.527	12.063	12.493	12.511	12.881	13.46	13.774	14.342	15.026
0.49568	1.0008	1.5232	2.0513	2.5717	3.026	3.5574	4.1601	4.6313	5.0582	5.4994	5.9433	6.6574	7.1473	7.5361	8.0932	8.475	9.091	9.678	10.078	10.459	11.056	11.396	12.08	12.511	12.899	12.935	13.57	13.924	14.516	15.085
0.49773	0.99394	1.5323	2.0841	2.6347	3.0538	3.5345	4.1349	4.6223	4.8883	5.5398	5.7548	6.6574	7.1712	7.6105	7.9259	8.4216	9.0072	9.6051	10.244	10.629	10.944	11.347	11.927	12.476	12.828	13.222	13.589	14.037	14.594	14.691
0.48755	1.0043	1.5551	2.1062	2.6157	3.0607	3.4664	4.1349	4.6675	4.9728	5.4893	6.0927	6.6802	7.1712	7.4622	8.0544	8.395	8.9933	9.5181	10.214	10.567	11.056	11.379	12.029	12.459	12.81	13.024	13.423	13.906	14.594	15.125
0.48554	1.0043	1.5277	2.0677	2.5842	3.0191	3.5345	4.093	4.6494	4.9917	5.6109	6.0498	6.6917	7.0997	7.4376	8.0286	8.475	8.9794	9.5036	10.244	10.397	11.072	11.445	11.961	12.389	12.792	12.988	13.644	13.943	14.555	15.225
0.48153	0.97343	1.5459	2.0841	2.6794	2.971	3.5041	4.177	4.6403	4.9823	5.662	6.0284	6.5893	7.1473	7.4254	8.0544	8.4483	9.077	9.5905	10.214	10.817	10.992	11.56	11.995	12.424	12.739	12.917	13.441	14.037	14.458	15.145
0.47361	0.98365	1.5232	2.0458	2.6031	2.9916	3.6035	4.1433	4.5953	4.9445	5.5195	5.9011	6.5554	7.1473	7.3158	8.0803	8.6229	9.1191	9.6342	10.093	10.474	10.96	11.56	12.131	12.476	12.721	12.952	13.46	14.019	14.439	15.366
0.49364	0.98365	1.5052	2.035	2.5968	3.026	3.5421	4.1601	4.5505	4.9258	5.4893	5.9539	6.6233	7.1593	7.4254	8.0028	8.5286	9.1472	9.6342	10.108	10.521	11.201	11.693	12.063	12.337	12.739	13.168	13.35	14.189	14.516	15.265
0.48957	1.0078	1.5097	2.0296	2.5905	2.9847	3.5269	4.1433	4.6043	4.9634	5.5499	5.9328	6.5893	7.1354	7.5361	8.0286	8.5959	9.0211	9.7366	9.9883	10.443	10.96	11.61	11.978	12.355	12.774	13.042	13.368	14.132	14.419	15.225
0.49364	0.99394	1.4873	2.0567	2.6411	3.0817	3.4966	4.177	4.5505	4.9445	5.4793	6.0177	6.5893	7.0997	7.4622	7.9131	8.5959	9.2461	9.766	10.048	10.428	11.04	11.478	12.08	12.424	12.845	13.06	13.423	14.419	14.633	15.245
0.49568	1.0043	1.5232	2.0677	2.5905	3.0053	3.5117	4.1349	4.5863	4.954	5.5702	5.9539	6.5104	7.0997	7.4868	8.0157	8.3156	9.1331	9.678	10.033	10.367	10.992	11.626	12.114	12.563	12.881	13.06	13.478	14.056	14.672	15.245
0.49364	0.9905	1.4962	2.0731	2.5842	3.0538	3.5881	4.1013	4.5684	4.9823	5.56	6.0391	6.4767	7.1354	7.4254	8.1192	8.5152	9.105	9.6342	10.154	10.802	11.185	11.494	12.131	12.616	12.863	13.024	13.423	13.962	14.613	14.868
0.5123	1.0217	1.5187	2.0513	2.6031	3.026	3.5193	4.0101	4.5416	4.9445	5.5195	5.9222	6.5441	7.1593	7.4376	8.1062	8.4884	9.077	9.6488	10.184	10.474	11.088	11.693	12.114	12.774	12.651	12.988	13.368	13.887	14.613	15.346
0.49773	1.0253	1.5323	2.0296	2.6794	3.0053	3.5041	4.1013	4.5505	4.9823	5.5499	5.9645	6.5441	7.1593	7.5485	8.0286	8.542	9.049	9.5905	10.229	10.397	10.928	11.626	12.063	12.493	12.774	13.204	13.478	13.812	14.497	15.265
0.50393	1.0253	1.5277	2.0513	2.5654	3.0957	3.5193	4.093	4.6313	4.9917	5.5297	5.9858	6.5216	7.2312	7.4132	8.0803	8.4884	9.0351	9.5181	10.154	10.459	10.865	11.61	11.911	12.581	12.355	12.988	13.607	13.774	14.594	15.346
0.49773	0.99739	1.4917	2.0404	2.6031	3.0538	3.5345	4.1685	4.6494	5.0297	5.5195	6.0071	6.5893	7.2312	7.4991	7.9771	8.5286	9.0072	9.5905	10.108	10.598	10.865	11.577	12.029	12.739	12.757	13.222	13.589	14.075	14.555	15.306
0.50186	0.9905	1.4873	2.035	2.5905	3.0957	3.5193	4.245	4.5863	5.0773	5.5195	6.0177	6.578	7.1235	7.4254	8.0157	8.4884	9.0211	9.6488	10.229	10.645	11.024	11.544	11.86	12.528	12.845	12.97	13.552	13.887	14.458	15.205
0.4916	1.0147	1.5187	2.0242	2.5717	3.0957	3.5498	4.177	4.6403	5.0297	5.4793	6.0284	6.5667	7.3522	7.4499	8.0157	8.4616	9.0072	9.5615	10.199	10.661	11.04	11.363	11.978	12.598	12.774	13.132	13.533	14	14.477	15.245
0.48353	0.99394	1.5643	2.0731	2.5968	3.0053	3.5041	4.1939	4.5416	5.0202	5.5499	5.9858	6.5667	7.3765	7.4745	7.99	8.4884	8.9933	9.6051	10.29	10.661	10.992	11.494	12.08	12.633	12.581	12.988	13.552	13.887	14.555	15.225
0.5102	1.0182	1.5459	2.0567	2.5905	3.0538	3.6189	4.1939	4.5953	4.9823	5.4893	5.9964	6.6006	7.4009	7.5361	8.0286	8.475	8.9655	9.547	10.321	10.645	10.912	11.544	12.2	12.651	12.81	13.042	13.644	13.849	14.381	15.285
0.48755	0.99394	1.4917	2.0786	2.6157	3.0677	3.4814	4.1855	4.5595	4.907	5.5095	5.9645	6.6574	7.34	7.4991	8.0286	8.5555	8.9655	9.5325	10.443	10.676	11.04	11.544	12.182	12.563	12.774	13.204	13.812	13.831	14.633	15.245
0.50186	0.99394	1.5142	2.1173	2.6094	3.0817	3.5498	4.1517	4.5595	4.8697	5.4893	6.0071	6.7146	7.4009	7.3765	8.0286	8.5959	9.063	9.4316	10.459	10.567	11.056	11.743	12.2	12.598	13.006	13.096	13.681	13.962	14.691	15.326
0.47755	0.99394	1.5142	2.0841	2.6094	3.026	3.6035	4.1433	4.6947	4.8883	5.4692	6.0177	6.7146	7.2433	7.5485	7.99	8.5959	9.063	9.4172	10.336	10.552	11.088	11.61	12.097	12.528	12.828	13.186	13.793	14.075	14.652	15.245
0.47361	0.99394	1.4917	2.0622	2.5968	2.9985	3.4966	4.1181	4.5505	4.9728	5.5905	5.9645	6.5216	7.2312	7.6604	7.9771	8.542	8.8963	9.3029	10.305	10.474	11.201	11.643	12.114	12.441	12.774	13.078	13.57	13.943	14.633	15.006
0.47755	0.98365	1.5689	2.0951	2.6094	3.026	3.5193	4.0846	4.5327	4.954	5.4893	5.9539	6.5667	7.1952	7.5485	7.9643	8.5152	8.7725	9.4029	10.123	10.521	11.233	11.61	12.148	12.459	12.633	12.952	13.774	13.887	14.711	15.205
0.46969	0.98365	1.5505	2.0786	2.5281	3.1168	3.4814	4.1349	4.5238	4.9164	5.5297	5.9116	6.612	7.2433	7.5857	8.0544	8.542	8.8963	9.5036	10.229	10.336	11.265	11.86	12.08	12.459	12.774	12.988	13.589	13.793	14.613	15.265
0.46969	0.99394	1.5187	2.0896	2.6031	3.0677	3.4739	4.1181	4.4883	4.9634	5.5297	5.9433	6.5441	7.2192	7.623	8.0673	8.5824	9.0072	9.576	10.229	10.397	10.912	11.643	12.097	12.563	12.863	13.006	13.441	13.849	14.555	15.285
0.48153	0.97683	1.5459	2.1117	2.5968	3.0677	3.4814	4.1349	4.5684	4.9634	5.5702	5.8696	6.5216	7.1593	7.5361	8.0157	8.6094	9.2319	9.5325	10.29	10.536	10.849	11.726	12.046	12.563	12.739	12.988	13.441	13.924	14.613	15.245
0.48153	0.98024	1.5551	2.0731	2.5905	3.033	3.4966	4.0763	4.6313	4.9445	5.4692	5.9645	6.612	7.1593	7.4868	8.1192	8.5689	9.1754	9.5036	10.184	10.707	10.897	11.527	12.063	12.355	12.863	13.024	13.515	13.981	14.594	15.245
0.48957	0.99394	1.5505	2.035	2.6602	2.971	3.5193	4.0763	4.6133	4.9258	5.5297	6.0605	6.578	7.1832	7.4745	8.1322	8.5555	9.063	9.6196	10.229	10.583	11.024	11.56	11.927	12.546	12.598	12.988	13.552	14	14.594	15.185
0.4916	0.9532	1.5689	2.0296	2.673	3.026	3.5117	4.1013	4.5774	4.9634	5.5702	5.9539	6.5554	7.1473	7.4868	8.1192	8.542	9.3456	9.6634	10.199	10.536	10.817	11.593	11.877	12.616	12.669	12.792	13.552	13.849	14.633	15.185
0.49364	1.0113	1.5551	2.0951	2.6094	2.9166	3.4814	4.1265	4.5505	5.0202	5.4492	6.0391	6.5441	7.2312	7.4622	8.0157	8.435	9.1754	9.5905	10.305	10.474	11.056	11.396	12.046	12.598	12.651	13.06	13.57	14.094	14.809	15.125
0.50601	0.98365	1.5368	2.0786	2.6157	3.0122	3.5193	4.093	4.5774	4.907	5.5905	6.0284	6.5554	7.2433	7.4376	7.9771	8.4616	9.0072	9.4316	10.244	10.428	11.008	11.911	12.046	12.633	12.828	12.988	13.607	14.019	14.769	15.225
0.49364	0.96666	1.5828	2.0567	2.6094	3.0399	3.5574	4.0846	4.5953	4.9258	5.56	5.9539	6.5329	7.3158	7.4009	8.0932	8.475	8.8687	9.5615	10.305	10.413	11.072	11.693	12.046	12.598	12.845	12.704	13.441	13.943	14.652	15.225
0.5102	0.99394	1.5505	2.0296	2.5592	3.0468	3.5193	4.1097	4.5684	4.9634	5.4292	5.9539	6.5104	7.3644	7.3765	7.9003	8.4483	9.0351	9.5615	10.351	10.505	11.136	11.61	12.046	12.406	12.633	12.917	13.681	13.924	14.535	15.245
0.50186	0.98024	1.5781	2.0786	2.5717	3.0053	3.5498	4.093	4.5595	4.9445	5.4592	5.9116	6.4656	7.34	7.3644	8.0673	8.3024	9.0351	9.766	10.29	10.552	10.976	11.511	12.08	12.459	12.721	13.042	13.589	13.906	14.555	15.205
0.50393	0.9905	1.5097	2.0951	2.5717	3.0399	3.5345	4.1265	4.6223	5.0202	5.4994	5.9328	6.5667	7.1832	7.3158	7.9259	8.5959	9.0211	9.7807	10.26	10.536	10.96	11.593	12.046	12.546	12.899	12.97	13.644	13.868	14.323	15.185
0.48153	0.97004	1.5007	2.0513	2.5842	3.0887	3.5727	4.1181	4.6494	4.9823	5.6007	5.9751	6.4992	7.1712	7.2795	8.0028	8.5689	8.9101	9.6926	10.229	10.552	10.897	11.793	12.114	12.633	12.845	13.006	13.663	13.981	14.458	15.386
0.49773	0.96666	1.5007	2.0841	2.578	3.0607	3.565	4.1265	4.6133	4.9728	5.6211	5.9858	6.5441	7.2795	7.3158	7.9771	8.8136	8.8963	9.6342	10.305	10.583	10.96	11.776	12.097	12.546	12.881	13.042	13.607	14	14.4	15.145
0.49773	0.98707	1.4917	2.0786	2.5968	3.033	3.6189	4.1265	4.6403	5.0012	5.4793	6.0498	6.4656	7.1473	7.3765	7.8876	8.65	8.9655	9.6196	10.26	10.692	10.96	11.927	12.097	12.476	13.006	13.078	13.496	13.943	14.594	14.927
0.49773	0.98707	1.5232	2.0951	2.6157	3.0468	3.565	4.1433	4.6133	4.9634	5.5499	6.0391	6.5667	7.2072	7.2674	7.8494	8.4884	8.8963	9.6488	10.428	10.865	11.104	11.726	11.978	12.406	12.917	13.222	13.35	14.094	14.574	15.165
0.49773	0.98024	1.5187	2.1006	2.6094	3.033	3.5421	4.1349	4.6223	4.9634	5.5195	6.0177	6.6006	7.1712	7.3279	7.9387	8.5152	8.9377	9.6051	10.229	10.944	11.088	11.56	12.029	12.493	12.863	13.024	13.478	13.868	14.574	14.966
0.48353	0.95991	1.5232	2.0404	2.6157	3.0747	3.5957	4.1097	4.6494	5.0392	5.56	6.1142	6.578	7.2795	7.3279	7.8876	8.5959	8.9794	9.4892	10.305	10.817	11.104	11.593	12.182	12.355	12.704	13.06	13.295	14.037	14.535	15.326
0.48957	0.98365	1.5052	2.0951	2.5842	3.033	3.6035	4.1265	4.6313	4.907	5.4893	6.1035	6.5104	7.2674	7.3887	7.8621	8.5824	9.1191	9.6051	10.26	10.676	11.12	11.527	12.217	12.355	12.704	13.078	13.423	14	14.672	15.125
0.48957	0.99739	1.5187	2.0951	2.5654	2.9985	3.6421	4.1685	4.5953	4.8977	5.5803	6.0498	6.5554	7.2553	7.3522	7.8876	8.5286	9.063	9.547	10.26	10.849	11.04	11.61	12.372	12.32	12.633	13.042	13.441	13.943	14.73	14.947
0.49773	0.99739	1.4917	2.035	2.5842	2.9985	3.5421	4.177	4.5863	4.9352	5.5905	5.9539	6.5329	7.2795	7.3765	7.7608	8.4884	9.105	9.547	10.275	10.723	11.024	11.478	12.251	12.389	12.774	13.15	13.441	13.943	14.633	14.848
0.48957	0.99739	1.5142	2.0622	2.5905	3.1309	3.5421	4.2024	4.5774	4.9164	5.5398	5.9433	6.5329	7.1952	7.4009	7.9003	8.4616	9.0351	9.6488	10.229	10.536	11.217	11.626	12.2	12.355	12.616	13.096	13.423	13.981	14.613	14.868
0.48353	1.0182	1.5097	2.0404	2.5592	3.0747	3.5193	4.1181	4.5595	4.9917	5.5095	6.0498	6.5329	7.2072	7.3887	7.8621	8.5555	9.1613	9.547	10.033	10.382	11.249	11.626	12.234	12.406	12.774	13.259	13.496	14.019	14.672	15.006
0.47755	0.98707	1.4873	2.035	2.5096	3.1238	3.4739	4.1349	4.6313	5.0487	5.5499	6.0498	6.4879	7.2072	7.4132	7.9003	8.6094	9.063	9.766	9.9585	10.413	11.04	11.709	12.251	12.355	12.81	13.204	13.57	13.962	14.75	15.306
0.49364	1.0078	1.4784	2.0841	2.5467	3.0607	3.5041	4.068	4.5684	4.954	5.5499	5.9116	6.5893	7.1235	7.4254	7.8748	8.65	9.1472	9.6342	10.048	10.49	10.928	11.709	12.285	12.355	12.739	13.024	13.533	13.906	14.613	15.406
0.48755	0.99739	1.5505	2.0841	2.553	2.9847	3.5804	4.1433	4.5061	4.9823	5.2612	6.1142	6.4544	7.1116	7.4622	7.9259	8.542	9.063	9.6634	10.169	10.49	11.04	11.743	12.285	12.441	12.686	13.114	13.644	13.906	14.594	15.145
0.49773	1.0323	1.4739	2.0622	2.6157	3.026	3.5269	4.1097	4.5684	5.0012	5.3497	6.0712	6.5667	7.0759	7.4132	8.0157	8.5018	9.063	9.6488	10.382	10.474	11.056	11.826	12.268	12.406	12.828	13.132	13.644	13.849	14.75	15.285
0.47954	1.0182	1.5459	2.0404	2.6031	3.0468	3.5498	4.1349	4.6043	4.9445	5.5095	6.0071	6.4321	6.9933	7.4132	8.0415	8.6094	9.1613	9.3886	10.29	10.49	10.944	11.776	12.268	12.511	12.757	13.15	13.441	14.056	14.868	15.285
0.49773	1.0429	1.5232	2.0841	2.6031	3.0399	3.5193	4.1601	4.6133	4.8977	5.4793	5.9964	6.5216	7.005	7.4254	8.0157	8.3552	9.1895	9.4029	10.397	10.351	10.96	11.544	12.234	12.476	12.792	13.222	13.515	14.266	14.672	15.165
0.48153	1.0182	1.5459	2.134	2.5717	3.0957	3.4589	4.2194	4.6313	4.9164	5.5398	5.9858	6.4879	7.0759	7.4991	8.0286	8.5286	9.063	9.4172	10.154	10.244	10.865	11.527	12.165	12.406	12.917	13.024	13.533	13.943	14.848	15.145
0.49773	0.97683	1.5643	2.0622	2.6157	2.9916	3.5193	4.1265	4.6043	4.9352	5.5195	5.9328	6.5216	7.0523	7.4745	7.99	8.5152	9.1191	9.5615	10.169	10.214	10.897	11.461	12.165	12.389	12.917	13.132	13.552	14.037	14.691	15.145
0.49773	0.98707	1.5551	2.0296	2.6221	3.0957	3.5193	4.1517	4.6403	4.8325	5.5398	6.0177	6.5216	7.1593	7.4376	7.9771	8.542	9.063	9.6634	10.29	10.229	10.944	11.626	12.234	12.616	12.721	13.259	13.552	14.151	14.672	15.046
0.48755	0.97683	1.5551	1.9866	2.5968	3.0399	3.5269	4.1601	4.5684	4.9917	5.5398	6.0284	6.5104	7.2192	7.4009	8.0286	8.6364	9.0351	9.899	10.305	10.29	11.008	11.478	12.406	12.528	12.81	12.917	13.644	14.132	14.594	15.145
0.50186	0.99394	1.5187	2.0188	2.6157	3.0607	3.5193	4.1855	4.5684	4.8604	5.5499	6.0391	6.578	7.2674	7.4868	8.0415	8.4616	8.9933	9.5615	10.26	10.26	10.992	11.379	12.131	12.476	12.97	12.828	13.626	14.056	14.439	15.245
0.49568	1.0113	1.5323	2.2646	2.5717	3.0747	3.5804	4.1517	4.5863	4.8883	5.4692	6.0177	6.5554	7.1712	7.4745	8.0932	8.5555	9.1191	9.8693	10.275	10.382	10.881	11.314	12.097	12.441	12.739	13.06	13.663	14.075	14.497	15.326
0.49364	0.98365	1.5142	2.0404	2.6031	3.0887	3.5574	4.1433	4.6043	4.9823	5.5195	5.8381	6.5667	7.2192	7.4376	8.1582	8.6364	9.0072	9.7807	10.033	10.413	10.992	11.626	12.2	12.424	12.633	13.024	13.515	14.037	14.613	15.508
0.49773	1.0113	1.5187	2.0951	2.578	3.0468	3.6112	4.1013	4.5774	4.8325	5.5905	5.9328	6.578	7.2072	7.4745	8.1322	8.5018	8.9101	9.7513	10.199	10.336	11.104	11.56	12.303	12.476	12.721	13.024	13.831	13.924	14.535	15.366
0.4916	0.95656	1.4828	2.1451	2.6666	3.0747	3.5117	4.1349	4.6313	5.0202	5.4292	5.9328	6.6574	7.2674	7.4745	8.0932	8.435	8.9655	9.6926	10.184	10.428	11.152	11.428	12.251	12.511	12.669	13.06	13.533	13.981	14.4	15.285
0.47165	1.0147	1.5097	2.1173	2.6221	3.0399	3.4739	4.1433	4.4355	4.879	5.5398	5.9116	6.5667	7.2192	7.4622	8.1974	8.4216	8.9655	9.8102	10.184	10.443	11.072	11.61	12.285	12.459	12.757	13.006	13.7	13.924	14.613	15.225
0.50393	1.0078	1.4917	2.0786	2.6284	3.138	3.5727	4.1601	4.5416	5.0297	5.5398	5.9539	6.5667	7.0641	7.5609	8.0028	8.4616	8.9377	9.6342	10.26	10.428	11.056	11.445	12.131	12.355	12.633	12.97	13.812	14.094	14.613	15.165
0.49568	1.0113	1.5232	2.134	2.7052	3.0538	3.5804	4.1517	4.5774	4.9258	5.5905	5.9964	6.6917	7.1354	7.4622	8.0932	8.3818	9.0351	9.6634	10.214	10.459	11.104	11.494	12.114	12.251	12.563	13.042	13.663	14.075	14.75	15.066
0.47755	0.9905	1.5187	2.1117	2.6666	3.0468	3.5957	4.1013	4.5953	5.0202	5.6415	5.9328	6.5441	7.0523	7.2072	7.99	8.4216	9.077	9.6196	10.184	10.443	11.088	11.527	12.012	12.511	12.598	13.042	13.552	14.208	14.574	15.105
0.52508	0.9905	1.5007	2.0951	2.6923	3.0817	3.5957	3.9201	4.6223	4.9917	5.5297	5.9433	6.5441	7.0523	7.1712	7.9515	8.475	9.063	9.576	10.184	10.413	11.04	11.544	12.165	12.459	12.633	12.952	13.57	13.962	14.809	14.907
0.5102	0.97004	1.5142	2.0677	2.6031	3.0053	3.5574	4.1349	4.6584	5.0773	5.6109	6.0284	6.6233	7.0759	7.4745	7.9643	8.4483	8.9239	9.7073	10.154	10.397	11.024	11.709	12.08	12.528	12.651	13.06	13.589	13.924	14.613	14.986
0.48353	1.0182	1.5277	2.0786	2.6031	3.0191	3.5498	4.2024	4.6494	4.907	5.4692	6.0498	6.3876	7.0997	7.4745	7.9771	8.5152	8.9516	9.5615	10.154	10.49	10.944	11.759	12.303	12.528	12.581	13.06	13.552	13.981	14.927	15.085
0.4916	1.0008	1.5142	1.9919	2.5968	3.0191	3.4966	4.093	4.6043	5.0107	5.5398	5.9645	6.5554	7.0878	7.2915	8.0286	8.5286	8.8824	9.5905	10.154	10.583	10.96	11.743	11.86	12.528	12.704	12.917	13.57	14	14.769	15.125
0.48554	0.97004	1.5232	2.0567	2.5968	3.0677	3.5041	4.1517	4.6403	4.9352	5.4592	6.0177	6.772	7.1832	7.623	8.0028	8.6229	8.9933	9.6196	10.336	10.614	10.928	11.659	11.81	12.704	12.686	13.15	13.515	14.037	14.809	15.165
0.49979	1.0147	1.5142	2.1507	2.6221	3.026	3.5421	4.1097	4.5416	4.9917	5.5195	5.9858	6.5554	7.1235	7.5609	7.9771	8.5286	9.0072	9.6051	10.093	10.521	10.881	11.776	11.826	12.406	12.845	13.259	13.644	14.094	14.73	15.285
0.49773	0.99394	1.5323	2.0458	2.6157	3.0607	3.5574	4.1013	4.6223	4.9164	5.4692	5.9539	6.6802	7.0997	7.4868	8.0803	8.9794	8.9794	9.5905	10.123	10.521	10.881	11.726	11.995	12.476	13.078	13.06	13.57	14.019	14.304	14.907
0.48755	0.99739	1.5414	2.0677	2.5968	3.0607	3.5804	4.1181	4.6043	4.9728	5.4994	5.9433	6.4432	7.1116	7.4376	8.0028	8.475	8.9933	9.6488	10.184	10.49	10.976	11.793	12.097	12.493	13.024	13.078	13.607	13.981	14.555	15.165
0.51653	0.92996	1.5187	2.0677	2.5905	3.0677	3.5727	4.1265	4.5327	5.0582	5.56	5.9116	6.5216	7.1712	7.5361	8.0415	8.5555	9.0072	9.6488	10.018	10.567	10.992	11.56	11.978	12.686	12.828	13.15	13.496	13.943	14.75	15.046
0.49979	0.99739	1.4962	2.0896	2.6538	3.0747	3.6344	4.1181	4.6223	5.0012	5.5499	5.9964	6.5104	6.9815	7.4868	7.9259	8.4216	8.9377	9.6196	10.078	10.583	10.912	11.643	12.268	12.389	12.828	13.042	13.515	13.962	14.75	15.046
0.49364	1.0078	1.5551	2.134	2.6602	3.0538	3.565	4.1181	4.5595	5.0107	5.6007	5.9751	6.6574	7.0404	7.6479	7.9515	8.7043	8.9933	9.5615	10.123	10.614	11.008	11.626	12.2	12.511	12.651	13.096	13.644	13.906	14.75	14.927
0.48755	0.99739	1.5323	2.0786	2.5717	3.0399	3.6344	4.0431	4.6313	4.9823	5.5702	5.9433	6.6574	7.1235	7.4868	7.9771	8.5824	8.9655	9.5181	9.9883	10.567	11.008	11.726	12.063	12.459	12.686	13.241	13.496	13.737	14.75	15.225
0.50601	0.9905	1.5232	2.0841	2.578	3.0399	3.5041	4.1517	4.5863	4.9728	5.56	6.0391	6.5554	7.2192	7.4254	7.9771	8.5286	8.9239	9.5181	10.108	10.536	10.96	11.693	12.029	12.476	12.739	13.042	13.626	13.868	14.848	15.225
0.4916	1.0008	1.5505	2.0841	2.5467	3.0399	3.5041	4.1013	4.6675	5.0965	5.5297	5.9964	6.578	7.0997	7.4991	8.0157	8.65	8.9933	9.4892	10.244	10.583	11.024	11.544	12.08	12.528	12.739	13.042	13.024	13.924	14.809	15.185
0.48957	0.97683	1.5052	2.0567	2.578	3.0957	3.4966	4.1265	4.6043	5.0582	5.5499	5.9964	6.5893	7.1473	7.4376	8.0286	8.5152	8.9516	9.547	10.214	10.382	10.976	11.61	12.029	12.493	12.845	13.114	13.607	13.906	14.574	15.145
0.49773	0.9905	1.5551	2.1006	2.5968	3.0747	3.5117	4.1433	4.6043	5.0297	5.4392	6.0284	6.612	7.34	7.4499	7.8621	8.4884	8.9516	9.5615	10.26	10.49	10.976	11.577	12.08	12.424	12.845	13.114	13.386	13.737	14.809	15.265
0.50393	0.95991	1.5414	2.0567	2.5654	3.033	3.565	4.1349	4.6765	5.1253	5.6007	6.0071	6.7031	7.1952	7.4376	7.8876	8.6094	8.9933	9.5325	10.154	10.428	10.96	11.577	12.08	12.493	12.845	12.97	13.533	13.626	14.323	15.225
0.48755	1.0043	1.5232	2.0786	2.5905	3.0122	3.4739	4.1349	4.6133	4.954	5.4592	6.0605	6.6233	7.1952	7.4622	7.9515	8.5555	9.049	9.5615	10.199	10.583	10.96	11.494	12.097	12.739	12.739	12.899	13.241	13.7	14.516	15.185
0.4916	0.9905	1.5323	2.0786	2.5654	3.0399	3.5574	4.1349	4.5684	5.1253	5.5803	6.0498	6.5104	7.0641	7.4868	7.9515	8.5555	8.9933	9.547	10.138	10.459	11.056	11.511	12.148	12.406	12.828	12.881	13.332	13.849	14.594	15.026
0.49773	0.98707	1.5414	2.0841	2.5905	3.0468	3.5498	4.2194	4.5774	4.9352	5.56	6.0071	6.612	7.1354	7.4622	8.0028	8.5555	8.9933	9.6342	10.078	10.629	11.168	11.527	12.097	12.303	12.952	13.096	13.368	13.681	14.848	15.026
0.50393	0.97683	1.5735	2.0458	2.5905	3.026	3.4664	4.1013	4.7221	5.0202	5.56	6.0927	6.6347	7.1952	7.4745	8.0028	8.5555	8.9933	9.6488	10.093	10.676	11.072	11.643	12.131	12.029	12.988	12.97	13.737	13.831	14.594	15.185
0.48957	1.0008	1.5142	2.008	2.5968	3.0887	3.5421	4.1433	4.5863	5.0392	5.6415	6.1035	6.6347	7.1354	7.4499	8.0028	8.5152	8.9794	9.4748	10.078	10.49	11.298	11.577	12.217	12.424	12.828	13.042	13.405	13.831	14.419	14.848
0.4916	1.0043	1.5097	2.0731	2.5405	3.0817	3.565	4.1517	4.5774	5.0678	5.5702	6.0284	6.612	7.1235	7.4868	8.0157	8.542	9.0072	9.7954	10.184	10.629	11.056	11.577	12.165	12.424	12.792	12.988	13.35	13.756	14.381	15.528
0.50186	0.98707	1.5142	2.0731	2.6347	3.0957	3.5193	4.1855	4.6494	5.0487	5.5702	5.9116	6.578	7.1235	7.4499	8.1192	8.5689	9.1331	9.8693	10.093	10.521	10.976	11.676	12.251	12.389	12.704	13.078	13.386	14.075	14.555	15.066
0.49568	1.05	1.5232	2.0404	2.5592	3.0747	3.5804	4.2024	4.5774	5.0773	5.5702	6.0284	6.6233	7.0997	7.5238	8.0028	8.7179	8.8963	9.7219	10.169	10.521	11.152	11.577	12.148	12.528	12.774	13.259	13.478	14	14.516	15.026
0.47755	1.0147	1.5097	2.1451	2.5219	3.0677	3.4364	4.1685	4.6223	5.0678	5.5803	6.1035	6.578	7.0641	7.4868	7.9515	8.6635	9.0351	9.7954	10.123	10.521	11.072	11.577	12.165	12.424	12.757	13.132	13.607	14	14.477	15.046
0.52079	0.99739	1.5368	2.0951	2.5842	3.0957	3.5041	4.1349	4.6675	5.0487	5.6007	5.9964	6.612	7.0997	7.4991	8.0028	8.4884	8.8549	9.5036	10.154	10.305	10.992	11.511	12.131	12.528	12.81	13.132	13.332	14	14.574	15.225
0.48755	0.95656	1.5414	2.0622	2.5842	3.1027	3.5269	4.1601	4.6223	5.0487	5.5905	6.082	6.5667	7.1235	7.5114	7.9387	8.5689	9.0072	9.7073	10.138	10.397	11.04	11.643	12.165	12.355	12.845	13.132	13.663	14.189	14.574	14.986
0.48755	0.99394	1.5277	2.0731	2.5717	3.0677	3.5117	4.1097	4.5774	5.0202	5.6211	5.9645	6.6347	7.1235	7.4622	7.9259	8.5286	9.2319	9.6634	10.229	10.443	11.152	11.593	12.182	12.424	12.774	13.078	13.478	13.906	14.75	15.006
0.48153	1.0043	1.5459	2.0458	2.6157	3.0817	3.5117	4.1939	4.5595	4.9728	5.6109	5.9964	6.6574	7.1593	7.6355	8.0028	8.475	9.2744	9.6488	10.214	10.459	11.008	11.593	12.251	12.459	12.899	13.096	13.332	13.887	14.555	15.225
0.50393	0.99394	1.5323	2.0513	2.6411	3.1097	3.5117	4.1517	4.5863	4.9352	5.7134	5.8381	6.7951	7.3037	7.4499	7.9771	8.4083	9.1472	9.6196	10.229	10.598	11.136	11.693	12.131	12.441	12.917	13.186	13.607	13.981	14.555	15.066
0.49979	0.98707	1.5232	2.0404	2.6094	3.0607	3.5804	4.1349	4.6043	5.0012	5.5803	6.0177	6.6233	7.1952	7.3037	8.0157	8.4483	9.0211	9.6196	10.275	10.49	10.96	11.643	12.148	12.355	12.476	12.828	13.441	14.094	14.594	14.907
0.48957	1.0008	1.5052	2.0622	2.553	3.0817	3.5421	4.1685	4.5416	4.9634	5.5905	5.9645	6.7835	7.0878	7.6604	8.0803	8.475	9.1613	9.6634	10.275	10.521	11.072	11.894	12.131	12.441	12.917	12.881	13.552	13.981	15.006	15.225
0.4916	0.99739	1.5414	2.0841	2.5654	3.0468	3.5421	4.1181	4.5595	5.0012	5.5499	6.0391	6.7031	7.1235	7.4132	8.1582	8.395	8.9516	9.5325	10.275	10.536	11.088	11.86	12.046	12.424	12.686	13.06	13.607	14.075	14.574	15.006
0.49568	0.97683	1.5232	2.0622	2.6411	3.1027	3.5193	4.1601	4.5505	5.0202	5.5803	5.9222	6.6006	7.1593	7.4254	8.0932	8.395	8.9516	9.6488	10.184	10.629	11.12	11.693	12.148	12.441	12.546	13.096	13.441	13.681	15.085	15.085
0.48554	0.99739	1.5277	2.0786	2.6157	3.0817	3.5117	4.1349	4.5863	5.0965	5.5702	6.0071	6.6802	7.2674	7.5733	8.0803	8.3552	8.9933	9.678	10.169	10.428	11.072	11.412	12.063	12.441	12.81	12.988	13.46	14.037	14.828	14.947
0.48755	1.0253	1.5142	2.0786	2.6221	3.0817	3.4814	4.1855	4.5595	5.0965	5.5095	5.9433	6.5667	7.1593	7.4009	8.0286	8.5689	8.9516	9.678	10.138	10.382	11.136	11.643	12.131	12.581	12.757	13.042	13.405	13.924	14.75	15.105
0.47558	0.98365	1.5874	2.1117	2.5842	3.0399	3.5041	4.2194	4.5953	5.0392	5.5398	5.9539	6.6233	7.1116	7.5857	8.0673	8.4216	8.9377	9.6926	10.078	10.567	11.04	11.527	11.843	12.441	12.97	13.06	13.57	13.962	14.652	15.046
0.46969	0.95991	1.5187	2.0242	2.5405	3.0399	3.489	3.9936	4.5774	5.0869	5.5095	5.9751	6.6006	7.1473	7.4254	8.0673	8.5286	8.9794	9.7807	10.108	10.49	10.944	11.693	12.046	12.774	12.774	13.132	13.478	14.094	14.907	15.006
0.4916	0.96666	1.5277	2.0134	2.6094	3.1238	3.5269	4.0597	4.5149	5.0678	5.5095	6.0177	6.612	7.2312	7.5238	7.9259	8.4884	8.8963	9.6634	10.123	10.567	11.136	11.826	11.843	12.739	12.917	13.168	13.533	13.831	14.477	15.105
0.47954	0.97683	1.5414	1.9973	2.6031	3.138	3.5727	4.2024	4.4531	5.0773	5.4994	5.9964	6.5329	7.0878	8.3288	8.1322	8.5555	8.8963	9.8545	10.093	10.443	11.136	11.676	11.978	12.528	12.739	13.042	13.386	13.849	14.497	15.085
0.48554	0.97343	1.5828	2.0188	2.6221	3.0468	3.4513	4.1517	4.4883	5.0582	5.5195	6.125	6.4992	7.1712	7.5114	8.0286	8.7179	8.8136	9.7954	10.138	10.413	11.088	11.743	12.114	12.546	12.704	13.06	13.46	13.924	14.477	15.205
0.51865	0.97683	1.5368	2.0841	2.5968	3.0817	3.4814	4.0597	4.5327	5.0392	5.4492	6.0391	6.4992	7.1473	7.4132	8.0803	8.6364	8.7725	9.7513	10.033	10.351	11.088	11.396	12.2	12.441	12.581	13.024	13.644	13.719	14.439	14.848
0.49773	0.97004	1.4562	2.0677	2.5281	3.0887	3.6421	4.1685	4.4972	5.0678	5.4292	5.9433	6.4992	7.1116	7.4254	8.0286	8.5152	8.8963	9.6051	10.154	10.29	11.072	11.461	11.877	12.372	12.598	13.096	13.496	13.793	14.555	14.927
0.49773	0.96666	1.5277	2.0731	2.6031	3.1168	3.4513	4.0266	4.4795	5.0392	5.4492	5.9964	6.3987	7.1116	7.5609	8.0544	8.4616	8.8824	9.6488	10.003	10.552	10.976	11.511	12.234	12.337	12.845	13.078	13.496	14.019	14.458	15.245
0.48554	0.97683	1.4873	2.0567	2.6284	3.026	3.5881	4.1265	4.4972	5.0012	5.5297	5.9433	6.4879	7.005	7.3279	8.0415	8.4083	8.8549	9.5905	9.9436	10.428	10.992	11.676	12.131	12.389	12.988	13.259	13.368	13.981	14.574	15.265
0.50601	0.98365	1.5459	2.0731	2.7441	3.1097	3.5269	4.1601	4.5149	5.0107	5.4994	6.125	6.4098	7.2433	7.2192	8.0028	8.542	8.7589	9.6196	10.123	10.552	10.992	11.61	12.182	12.441	12.792	13.114	13.552	13.887	14.633	14.691
0.50186	0.99739	1.4651	2.0677	2.6031	3.0677	3.5269	4.093	4.5238	5.0107	5.4994	6.1142	6.5104	7.1116	7.3765	7.9131	8.5959	8.8963	9.547	10.003	10.505	11.024	11.494	12.046	12.476	12.917	13.132	13.441	13.793	14.516	15.245
0.49773	1.0113	1.5689	2.0677	2.673	3.0399	3.4966	4.1181	4.5505	5.0107	5.4994	6.0284	6.5441	7.1116	7.4254	8.0673	8.5018	8.7725	9.678	10.063	10.397	10.96	11.626	11.978	12.424	12.704	13.204	13.607	13.756	14.594	15.265
0.49773	1.0288	1.5781	2.0513	2.6284	3.026	3.5117	4.1349	4.5595	5.0012	5.5499	6.082	6.578	7.3158	7.4132	7.824	8.5689	8.8136	9.6634	9.9287	10.397	10.928	11.61	12.063	12.441	12.739	13.241	13.277	14.019	14.574	14.947
0.4916	1.0182	1.5505	2.0951	2.6602	3.1238	3.5498	4.0763	4.5416	4.9352	5.5803	6.19	6.5667	7.2674	7.4622	7.8494	8.5152	8.8549	9.5615	10.048	10.614	10.928	11.577	12.148	12.493	12.721	13.168	13.46	13.756	14.516	15.085
0.49773	1.0253	1.5142	2.0458	2.6221	3.0677	3.4966	4.1097	4.5238	4.9258	5.4893	6.125	6.6233	7.2553	7.4868	7.9771	8.5286	8.9377	9.4892	10.033	10.413	11.152	11.544	12.165	12.389	12.881	13.259	13.441	13.719	14.535	15.026
0.50601	1.0323	1.5142	2.0731	2.5717	3.0053	3.5041	4.1181	4.5863	4.9917	5.6007	6.0927	6.6006	7.2795	7.5361	8.1062	8.542	8.7999	9.5615	9.9734	10.505	11.008	11.577	12.2	12.476	12.616	13.114	13.589	13.906	14.73	15.125
0.5102	1.05	1.5187	2.0677	2.5842	2.971	3.5727	4.093	4.6675	5.0965	5.4994	6.0177	6.6347	7.2915	7.5485	7.9003	8.5152	8.8824	9.4316	10.123	10.397	11.008	11.56	12.08	12.651	12.774	13.06	12.97	13.906	14.477	15.066
0.50393	1.0323	1.5232	2.0951	2.6538	3.0122	3.5269	4.1181	4.7221	5.0582	5.5398	6.0605	6.6574	7.2192	7.623	7.9131	8.6229	8.9933	9.4029	10.214	10.583	11.008	11.544	12.165	12.792	12.792	12.988	13.496	14.094	14.516	15.046
0.49364	1.0182	1.5505	2.0458	2.6157	3.0053	3.5957	4.0431	4.7404	5.0107	5.56	6.0927	6.6802	7.1712	7.4991	8.0028	8.5555	8.9377	9.446	10.078	10.413	10.865	11.577	12.029	12.792	12.828	12.899	13.277	13.868	14.4	15.046
0.49773	1.0008	1.5323	2.0786	2.5654	3.0887	3.6035	4.0514	4.6856	4.9917	5.4592	6.125	6.6574	7.1952	7.4868	7.9643	8.5689	8.9655	9.5325	10.108	10.413	11.04	11.659	11.961	12.828	12.792	13.423	13.57	14.019	14.4	15.046
0.50601	1.0323	1.5459	2.0951	2.5654	3.0607	3.6577	4.177	4.713	5.0107	5.4793	6.0712	6.6688	7.1354	7.5981	8.0544	8.542	8.9655	9.678	10.123	10.474	10.928	11.56	11.894	12.739	12.757	12.952	13.313	13.719	14.439	15.225
0.49979	1.0008	1.5323	2.0296	2.5905	3.0887	3.5498	4.1939	4.713	4.9728	5.6517	6.0927	6.6347	7.1952	7.5361	8.0415	8.5286	8.9101	9.7219	10.048	10.382	10.976	11.544	11.877	12.721	12.616	13.132	13.423	13.607	14.439	15.105
0.50601	1.0008	1.5142	2.0951	2.578	3.0677	3.6035	4.1433	4.6403	5.0012	5.56	5.9964	6.5329	7.1593	7.6105	8.0544	8.542	8.9101	9.6926	10.123	10.474	10.976	11.81	11.927	12.633	12.828	12.97	13.533	13.681	14.497	15.225
0.49773	0.97004	1.5277	2.0786	2.5717	3.1168	3.5881	4.0846	4.6856	4.9634	5.4692	6.0391	6.5216	7.1235	7.5485	8.0803	8.5959	8.9655	9.7073	10.093	10.49	11.072	11.593	12.046	12.581	12.792	12.863	13.405	13.644	14.497	15.346
0.49773	0.96328	1.5142	2.0951	2.6094	3.0957	3.5881	4.1433	4.6494	4.9634	5.5297	6.082	6.6233	7.1354	7.7105	8.0673	8.65	8.9101	9.678	9.9138	10.521	11.233	11.593	12.182	12.581	13.024	12.917	13.496	13.737	14.439	15.386
0.49773	0.96328	1.5007	2.0188	2.6094	3.0399	3.5957	4.093	4.6313	5.0202	5.5499	6.0284	6.4992	7.1116	7.7105	8.1712	8.5286	8.8274	9.5036	10.169	10.598	10.96	11.626	12.182	12.563	12.792	13.132	13.46	13.906	14.574	15.306
0.49568	0.96328	1.4695	2.0841	2.6031	3.0399	3.5804	4.1433	4.6313	5.0678	5.5905	6.0927	6.5216	7.1712	7.4991	8.1062	8.6229	8.8136	9.678	10.063	10.521	10.849	11.593	12.285	12.546	12.917	12.917	13.332	13.943	14.633	15.105
0.4916	0.98024	1.4873	2.1006	2.5905	3.026	3.565	4.1349	4.6133	5.0773	5.6007	6.0605	6.4209	7.2312	7.4991	8.0673	8.5555	8.9377	9.547	10.123	10.505	10.928	11.659	12.441	12.739	12.828	13.114	13.552	13.906	14.574	15.285
0.48153	0.99394	1.5459	2.0951	2.6538	3.0887	3.5345	4.1685	4.6223	5.0869	5.5905	6.19	6.5216	7.2553	7.4868	8.1192	8.5555	8.9239	9.547	10.154	10.474	11.024	11.56	12.355	12.863	12.845	13.15	13.496	13.943	14.419	15.125
0.47558	0.98707	1.5459	2.0786	2.578	3.026	3.5498	4.1433	4.6765	5.0773	5.3695	6.1358	6.4656	7.1952	7.4254	8.2235	8.5152	8.9101	9.5325	10.154	10.521	10.944	11.659	12.217	12.633	12.845	12.881	13.222	13.887	14.458	15.185
0.47361	0.97343	1.5505	2.1062	2.553	3.0607	3.5498	4.1433	4.6403	5.0297	5.5702	5.9751	6.5554	7.1235	7.4376	8.1322	8.5824	9.1613	9.6488	10.154	10.536	10.992	11.626	12.268	12.546	12.721	13.114	13.46	13.906	14.323	15.205
0.46387	0.98365	1.5187	2.0786	2.5905	3.0538	3.5498	4.1013	4.6494	5.0965	5.4793	6.0605	6.6233	7.1952	7.3887	8.1192	8.5689	8.9933	9.766	10.229	10.397	11.04	11.577	12.148	12.528	12.81	13.114	13.368	13.906	14.4	15.205
0.45055	0.97343	1.5323	2.1284	2.5592	3.0957	3.565	4.1181	4.6584	5.0582	5.3695	5.9539	6.646	7.1593	7.4745	8.0544	8.5555	8.9377	9.7954	10.321	10.645	10.912	11.659	12.182	12.704	12.704	13.024	13.186	13.943	14.458	15.326
0.47954	1.0008	1.5187	2.0786	2.5842	3.0399	3.5727	4.1517	4.6584	5.0202	5.4292	6.0927	6.6347	7.1235	7.6729	8.0028	8.5152	8.9794	9.7073	10.214	10.521	11.152	11.347	12.251	12.651	12.686	13.078	13.15	13.887	14.691	15.205
0.46969	1.0008	1.5232	2.0622	2.578	3.033	3.5421	4.1939	4.6947	4.9823	5.5803	6.0177	6.5893	7.1116	7.4745	7.9387	8.65	9.0072	9.7219	10.169	10.397	10.802	11.593	12.08	12.633	12.686	12.988	13.186	13.868	14.848	15.897
0.47755	0.98707	1.5551	2.0026	2.5968	3.0538	3.4739	4.1097	4.713	5.0678	5.4692	5.9011	6.612	7.1235	7.5238	7.9131	8.4884	8.9933	9.6488	10.244	10.552	10.802	11.544	12.131	12.493	12.739	13.06	13.241	13.943	14.828	15.185
0.4658	0.98365	1.5232	1.9919	2.6347	3.0677	3.4438	4.0183	4.6856	5.0012	5.5195	5.9539	6.6006	7.1593	7.5361	7.9643	8.5824	9.0211	9.5325	10.321	10.29	10.754	11.659	12.114	12.581	12.935	13.096	13.295	14.075	14.828	15.225
0.48353	0.98024	1.5368	2.0458	2.578	3.0538	3.489	4.0101	4.6403	4.954	5.5702	5.88	6.612	7.0286	7.6355	7.99	8.6771	8.9933	9.5905	10.199	10.552	10.786	11.659	12.097	12.651	12.863	13.186	13.478	13.849	14.887	15.145
0.48957	0.97683	1.5459	2.0567	2.5968	3.1097	3.5421	4.0514	4.6223	4.9917	5.6007	5.8906	6.5554	7.0404	7.4991	7.9771	8.542	9.0351	9.7513	10.26	10.397	10.865	11.743	12.2	12.616	12.917	13.096	13.423	13.812	14.789	15.225
0.47954	0.96328	1.5414	2.0404	2.6094	3.0747	3.5269	4.0763	4.5774	4.9445	5.4893	5.9328	6.6006	7.0878	7.698	7.8114	8.6635	8.9516	9.6926	10.169	10.367	11.056	11.693	12.251	12.669	12.917	13.06	13.313	13.793	14.75	15.406
0.4916	0.99739	1.5597	1.9866	2.6031	3.0817	3.5269	4.068	4.6313	4.9445	5.6007	5.8906	6.5216	7.0878	7.5733	7.8367	8.5555	8.9933	9.6926	10.184	10.443	10.992	11.743	12.337	12.704	12.988	13.042	13.35	13.607	14.848	15.285
0.48554	0.97683	1.5505	2.0513	2.6221	3.0677	3.4589	4.093	4.5953	4.9164	5.4893	5.9116	6.578	7.1473	7.6604	7.9515	8.5286	8.9239	9.5905	10.199	10.413	11.088	11.693	12.441	12.774	12.952	13.006	13.332	13.644	14.75	15.085
0.48554	0.9905	1.5597	2.0513	2.6094	2.9916	3.4966	4.1013	4.6133	4.907	5.5297	5.9645	6.5104	7.0878	7.6479	7.9771	8.542	8.9655	9.547	10.063	10.397	11.104	11.593	12.337	12.563	12.917	13.042	13.478	13.737	14.887	15.165
0.46969	0.97343	1.5921	2.0731	2.578	3.0957	3.4739	4.0763	4.5416	4.879	5.5905	5.8906	6.5104	7.0404	7.6355	7.8748	8.6635	8.9794	9.547	10.154	10.26	11.152	11.544	12.217	12.935	12.863	13.186	13.46	13.774	14.927	15.046
0.47954	0.98365	1.5874	2.0786	2.5717	3.0399	3.4739	4.1181	4.5684	5.0297	5.6211	5.9539	6.5329	7.0759	7.5485	7.9387	8.5959	8.9655	9.6196	10.169	10.351	11.104	11.659	12.063	12.616	12.828	13.277	13.405	13.719	14.691	15.066
0.48353	0.96328	1.5735	2.0622	2.6221	3.0468	3.489	4.1265	4.4531	5.0392	5.6928	5.88	6.5441	7.1473	7.5857	7.9259	8.5555	9.049	9.3456	10.018	10.552	11.04	11.61	12.303	12.165	12.669	13.06	13.405	13.812	14.633	15.125
0.47558	1.0043	1.5368	2.0731	2.578	3.0468	3.4513	4.1855	4.4972	5.0012	5.6109	5.9751	6.5329	7.1235	7.5981	8.1062	8.4616	8.9794	9.6488	10.063	10.552	11.104	11.56	12.251	12.581	12.739	12.988	13.496	13.906	14.711	15.066
0.46969	0.9532	1.5052	2.0786	2.6602	3.033	3.4289	4.1349	4.6043	4.9164	5.5905	6.0927	6.6233	6.9463	7.5361	8.1322	8.65	9.063	9.7073	10.138	10.583	10.976	11.511	12.114	12.511	12.988	12.881	13.46	13.981	14.73	15.185
0.48554	1.0253	1.5277	2.0567	2.6411	3.0538	3.4739	4.1433	4.5774	4.9352	5.5803	6.1035	6.6917	7.1116	7.5238	8.1192	8.5152	9.063	9.5615	10.078	10.583	10.976	11.643	12.2	12.493	12.774	12.935	13.46	14.037	14.73	15.105
0.48755	1.0113	1.5007	2.0458	2.6157	3.0191	3.5421	4.1855	4.6494	4.8511	5.6723	6.1575	6.4432	7.1712	7.5114	7.9387	8.5018	9.0211	9.678	10.184	10.474	11.056	11.544	12.2	12.563	12.917	13.024	13.46	14.208	14.613	15.066
0.48153	1.0078	1.5232	2.0567	2.6347	3.1097	3.5117	4.1685	4.4883	4.9352	5.6313	6.125	6.5554	7.1235	7.4499	8.0803	8.4216	9.063	9.5036	10.199	10.474	11.072	11.511	12.131	12.493	12.97	12.863	13.552	14.208	14.75	15.066
0.48554	1.0147	1.5414	2.1395	2.6347	2.9642	3.5193	4.1349	4.5953	4.9445	5.6415	6.082	6.6347	7.1593	7.4376	8.0673	8.5018	9.1472	9.5181	10.169	10.567	11.249	11.379	12.148	12.633	12.881	12.988	13.552	14.056	14.691	15.125
0.47954	0.9532	1.5323	2.1062	2.6411	2.8829	3.5193	4.1601	4.6043	4.954	5.5803	6.1035	6.612	7.0878	7.6855	7.9643	8.4884	9.0211	9.6196	10.093	10.552	11.185	11.461	12.148	12.704	12.935	12.899	13.405	13.924	14.574	14.789
0.48153	1.0572	1.5323	2.0677	2.6666	3.0677	3.4814	4.1097	4.5953	5.0107	5.5702	6.1358	6.8182	7.0641	7.5361	7.9259	8.4216	9.0211	9.7073	10.063	10.583	11.136	11.61	12.148	12.493	12.899	13.042	13.46	13.831	14.574	14.809
0.50186	0.97343	1.5368	2.0458	2.6347	2.9166	3.4966	4.177	4.4883	4.9445	5.5702	6.1035	6.6688	7.0997	7.5114	7.9771	8.5018	8.9101	9.7219	10.138	10.661	11.104	11.494	12.114	12.32	12.81	12.845	13.46	13.906	14.613	15.046
0.52293	0.99394	1.5232	2.0404	2.6347	3.0607	3.5193	4.1517	4.4883	4.954	5.5803	6.0498	6.6006	7.1116	7.6355	7.9643	8.435	9.1472	9.6051	10.078	10.723	11.185	11.56	11.826	12.739	12.739	12.372	13.46	13.719	14.711	15.085
0.48755	1.0113	1.4917	2.0458	2.6031	2.9779	3.489	4.1265	4.5774	4.9445	5.5297	6.0071	6.4656	7.0997	7.3765	7.8876	8.4616	9.077	9.5615	10.214	10.786	11.024	11.593	12.097	12.616	12.774	13.06	13.35	13.868	14.633	15.026
0.5102	0.97004	1.5187	2.0567	2.5905	3.0817	3.5117	4.1013	4.7404	4.9445	5.56	6.0177	6.4321	7.1354	7.4622	8.0028	8.4216	8.9516	9.547	10.154	10.817	10.992	11.626	12.046	12.528	12.863	13.024	13.222	13.924	14.672	14.907
0.46387	1.0217	1.5551	2.0458	2.6284	3.0607	3.5421	4.1517	4.6133	5.0773	5.5499	6.1035	6.5441	7.0641	7.5238	7.9515	8.6364	9.105	9.5615	10.184	10.583	10.897	11.693	12.097	12.581	12.863	13.078	13.277	13.924	14.691	15.125
0.49773	1.0078	1.5097	2.0458	2.6284	3.026	3.4589	4.093	4.5684	4.9823	5.56	6.0605	6.5554	7.2433	7.4622	8.0028	8.65	8.9377	9.547	10.123	10.521	10.992	11.643	11.961	12.598	12.757	13.06	13.35	13.924	14.672	15.026
0.5081	1.0043	1.5052	2.0786	2.5842	3.0399	3.4739	4.0431	4.7863	4.9917	5.6517	6.0605	6.6347	7.2915	7.4868	7.9515	8.5959	9.063	9.446	10.123	10.598	10.944	11.61	12.114	12.424	12.863	13.078	13.241	13.887	14.613	15.125
0.51441	0.9905	1.5142	2.0622	2.5158	3.0607	3.5345	4.1013	4.5953	4.7955	5.56	6.0605	6.6802	7.0759	7.4499	8.1843	8.4884	8.9377	9.5325	10.003	10.614	10.944	11.511	12.029	12.372	12.97	13.024	13.222	13.831	14.497	15.026
0.48957	1.0078	1.4962	1.9653	2.5717	3.0677	3.565	4.1517	4.6133	5.0869	5.5499	6.082	6.6574	7.0878	7.5114	8.0286	8.4216	8.9933	9.5615	10.336	10.614	10.912	11.577	12.182	12.389	12.845	13.15	13.313	13.943	14.555	15.085
0.49568	0.97683	1.5142	2.0404	2.6475	3.0538	3.5804	4.0597	4.6043	5.0297	5.5398	6.0498	6.749	7.0878	7.5485	8.1452	8.475	9.091	9.5036	10.154	10.598	10.833	11.396	12.148	12.528	13.006	13.132	13.496	13.849	14.535	15.125
0.49568	0.98707	1.5323	2.0567	2.6094	3.0538	3.6189	4.1097	4.5953	5.0392	5.5905	6.125	6.6233	7.0997	7.4991	7.9643	8.435	8.9933	9.547	10.123	10.614	10.817	11.693	12.063	12.389	12.917	13.277	13.441	13.981	14.497	15.145
0.48755	1.0008	1.5007	2.0731	2.6094	3.1097	3.5881	4.177	4.7038	5.0773	5.5297	6.0498	6.6917	7.1235	7.4991	8.1192	8.5286	9.1331	9.547	10.199	10.413	11.088	11.527	12.2	12.441	12.81	13.222	13.46	13.756	14.652	14.986
0.4916	1.0078	1.5097	2.0242	2.5905	3.0399	3.565	4.0846	4.6223	5.0582	5.8277	6.0498	6.6574	7.1473	7.5114	8.3685	8.5824	9.1895	9.5905	10.169	10.505	10.944	11.494	12.148	12.476	12.845	13.386	13.441	13.906	14.73	14.809
0.4916	0.9905	1.5187	2.0677	2.5717	3.0399	3.5421	4.1181	4.6043	4.9445	5.5499	6.0071	6.6347	7.1116	7.4622	7.8748	8.4083	9.049	9.6342	10.108	10.505	10.897	11.643	12.114	12.424	12.616	13.295	13.295	13.756	14.535	15.046
0.50601	0.9905	1.5459	2.1284	2.5968	3.0399	3.5804	4.093	4.6133	5.1349	5.6313	6.0498	6.578	7.0878	7.4376	8.0803	8.5689	9.049	9.446	10.033	10.552	11.056	11.709	12.217	12.372	12.721	13.423	13.386	13.849	14.613	15.085
0.4916	0.98024	1.5551	2.0622	2.6031	2.9916	3.565	4.1265	4.5953	4.9728	5.3398	6.0177	6.612	7.0523	7.5981	8.0673	8.4884	9.049	9.5905	10.123	10.629	11.088	11.826	12.217	12.268	12.881	13.186	13.186	13.962	14.594	15.245
0.48755	1.0288	1.5505	2.2015	2.5968	3.0191	3.5957	4.1265	4.6133	5.0202	5.5499	5.9645	6.6347	7.0523	7.4376	7.9771	8.3818	9.0211	9.7513	10.138	10.754	10.96	11.826	11.726	12.528	12.81	13.114	13.368	14.019	14.555	15.245
0.49568	0.98365	1.5551	2.035	2.5968	3.0122	3.5193	4.1601	4.5149	4.9917	5.5702	6.0498	6.5667	7.0759	7.2312	8.0544	8.475	9.063	9.5905	10.123	10.614	10.992	11.659	12.063	12.546	12.792	13.15	13.386	14.056	14.594	15.205
0.46387	1.0043	1.5414	2.0622	2.6347	3.0538	3.5269	4.1265	4.6133	5.0297	5.5702	6.0391	6.5667	7.1712	7.4132	8.1322	8.5018	9.063	9.6342	10.063	10.428	11.008	11.56	11.927	12.148	12.739	13.096	13.423	13.812	14.574	15.225
0.49364	0.98707	1.5414	2.0841	2.5654	3.0817	3.5345	4.1097	4.6223	5.0012	5.5905	6.0071	6.612	7.2433	7.623	8.0157	8.5689	9.0351	9.678	10.108	10.692	10.897	11.445	11.927	12.424	12.739	13.096	13.496	13.774	14.497	15.165
0.4916	0.99394	1.5323	2.0622	2.5281	3.1168	3.5957	4.1265	4.6403	5.0869	5.5195	6.0177	6.578	7.1116	7.3887	8.1192	8.4083	9.1895	9.6196	10.199	10.567	11.072	11.428	12.2	12.493	12.792	13.132	13.332	13.868	14.458	15.366
0.50393	0.98365	1.5689	1.9973	2.5842	2.9916	3.3768	4.1181	4.6223	4.9634	5.5702	6.0498	6.6574	7.0878	7.3279	8.0415	8.4483	9.0072	9.576	10.184	10.598	10.96	11.478	12.182	12.511	12.917	12.97	13.35	13.663	14.633	14.986
0.50601	0.98365	1.6061	2.0567	2.6157	3.0747	3.4739	4.1097	4.6223	4.9634	5.5095	6.0927	6.6233	7.2915	7.3644	8.1062	8.475	8.9655	9.547	10.093	10.536	10.976	11.478	12.148	12.424	13.042	12.881	13.589	13.943	14.535	14.927
0.50186	0.99394	1.5689	2.0622	2.5968	3.0538	3.6266	4.1013	4.5863	5.0773	5.5398	6.0712	6.6917	7.1473	7.4254	8.0673	8.3685	8.9516	9.5325	10.123	10.629	11.04	11.478	11.978	12.476	12.828	12.952	13.552	13.7	14.555	15.185
0.4916	1.0147	1.4828	2.1006	2.6157	3.0887	3.565	4.1181	4.5595	5.0107	5.5195	6.0927	6.6802	7.2795	7.3765	7.9771	8.475	8.8824	9.7807	10.048	10.459	10.912	11.494	11.961	12.528	12.863	13.024	13.589	13.943	14.555	15.046
0.48957	1.0008	1.5007	2.1117	2.6031	3.0607	3.565	4.1265	4.5327	4.907	5.4292	6.0284	6.6233	7.2312	7.4009	7.99	8.5018	8.8824	9.6051	10.26	10.661	10.817	11.626	12.08	12.389	12.917	13.132	13.423	14.019	14.828	14.887
0.5123	0.99739	1.6108	2.1062	2.6221	3.1309	3.5727	4.2109	4.5684	5.0107	5.4492	6.0605	6.5893	7.2072	7.4499	7.99	8.435	8.9655	9.576	10.169	10.536	11.088	11.593	12.165	12.493	12.97	12.988	13.313	13.405	14.672	15.006
0.49364	1.0008	1.5097	2.0731	2.6411	3.026	3.5345	4.068	4.6043	5.0297	5.3398	6.0712	6.6802	7.1116	7.4009	8.0028	8.6364	8.9377	9.5905	10.382	10.49	11.185	11.544	12.046	12.563	12.952	12.757	13.46	13.681	14.672	14.769
0.49773	0.99394	1.5277	2.035	2.6094	3.0399	3.489	4.2109	4.713	5.0012	5.5195	5.9751	6.612	7.0404	7.4991	7.9003	8.5286	8.9655	9.5181	9.8693	10.707	11.072	11.593	11.995	12.355	12.97	12.757	13.35	13.868	14.672	15.046
0.48957	0.98707	1.5007	2.0622	2.6157	3.1168	3.5269	4.1517	4.5505	4.9634	5.3993	5.9116	6.578	7.3644	7.4991	7.9771	8.5959	8.9239	9.678	10.29	10.614	11.088	11.643	11.81	12.389	12.881	12.899	13.441	13.924	14.594	15.066
0.48755	0.98365	1.5874	2.0731	2.6794	3.0468	3.5345	4.1097	4.5416	5.0012	5.4994	6.0712	6.578	7.2312	7.4745	8.0028	8.6094	8.9933	9.4748	10.229	10.552	10.881	11.593	12.165	12.739	12.988	12.935	13.386	14.094	14.555	15.165
0.4916	0.99739	1.5277	2.0622	2.6094	3.0538	3.565	4.2194	4.6223	4.9445	5.4692	6.1358	6.612	7.1354	7.4622	8.0544	8.542	8.9655	9.576	10.351	10.505	10.992	11.56	11.911	12.424	12.917	13.024	13.663	13.868	14.285	14.927
0.48153	0.99394	1.5277	2.1507	2.5654	3.1309	3.5421	4.1181	4.6584	4.954	5.5095	6.0391	6.5329	7.2072	7.4622	7.9771	8.5018	9.063	9.7366	10.244	10.413	11.072	11.478	12.012	12.424	12.881	13.241	13.295	13.793	14.381	15.185
0.49568	0.9905	1.5277	2.0296	2.5158	3.1521	3.489	4.1013	4.5774	4.8511	5.5702	6.3765	6.4992	7.1832	7.5114	7.9771	8.5018	9.1472	9.6488	10.275	10.474	11.056	11.577	11.978	12.476	12.828	13.114	13.607	13.831	14.613	15.145
0.49568	0.98707	1.5551	2.0677	2.5343	3.1238	3.5269	4.1013	4.5595	4.8697	5.5499	6.1358	6.5554	7.1952	7.4868	7.7861	8.5018	9.1613	9.7366	10.351	10.459	11.056	11.527	12.08	12.511	12.81	13.15	13.313	13.943	14.652	14.868
0.48554	0.98024	1.5921	2.0786	2.5905	3.0957	3.5193	4.1013	4.6133	4.9445	5.6007	5.9858	6.5893	7.1832	7.5733	7.99	8.435	9.2319	9.4604	10.336	10.474	11.024	11.445	12.08	12.424	12.686	12.988	13.478	13.868	14.672	15.225
0.4916	0.9905	1.5187	2.0951	2.553	3.1168	3.5269	4.093	4.5863	4.9917	5.5297	6.1575	6.6347	7.0997	7.4622	8.0028	8.4616	9.1331	9.7219	10.199	10.552	11.008	11.445	12.131	12.441	12.97	13.114	13.496	13.756	14.633	15.165
0.49773	1.0043	1.4739	2.0622	2.6221	3.1238	3.489	4.0763	4.6223	4.8977	5.5297	5.9751	6.6006	7.1952	7.5485	8.0673	8.3685	9.2319	9.6488	10.382	10.614	11.008	11.282	12.285	12.528	12.792	13.06	13.478	13.868	14.555	15.046
0.48957	1.0008	1.5052	2.0786	2.5467	3.0957	3.5345	4.2109	4.6043	4.9164	5.5095	6.0177	6.6006	7.1593	7.4009	8.1322	8.5555	9.2036	9.5905	10.29	10.77	10.96	11.527	12.303	12.268	12.828	13.186	13.552	13.793	14.516	15.026
0.49773	1.0253	1.5187	2.0567	2.5717	3.1097	3.5345	4.1265	4.6133	5.0202	5.5195	5.9645	6.5893	7.2674	7.6355	8.1192	8.5286	9.1754	9.4316	10.199	10.676	10.897	11.494	12.32	12.424	12.721	13.186	13.607	13.849	14.672	15.245
0.49773	1.0008	1.5187	2.0841	2.6284	3.0887	3.565	4.1939	4.6313	4.9917	5.4994	5.9858	6.5667	7.2192	7.3522	8.1322	8.6364	9.1331	9.5615	10.184	10.661	11.04	11.61	12.012	12.511	12.739	13.114	13.441	13.812	14.594	15.026
0.47755	1.0043	1.5414	2.008	2.6347	3.033	3.5269	4.0597	4.5863	4.9823	5.5499	5.9858	6.612	7.1952	7.4622	7.9259	8.5824	9.0211	9.4604	10.138	10.505	10.928	11.461	12.114	12.633	12.757	13.114	13.46	13.793	14.711	15.026
0.48353	0.97004	1.5323	2.0731	2.6794	3.0538	3.5727	4.068	4.6133	4.9445	5.4893	5.9328	6.6574	7.1832	7.4254	8.1322	8.6229	8.9933	9.5036	10.123	10.598	10.912	11.759	12.012	12.528	12.952	13.15	13.313	13.533	14.769	14.947
0.47361	1.0078	1.5459	2.0404	2.5343	3.033	3.5193	4.1433	4.6133	5.0012	5.5905	6.0071	6.5667	7.1832	7.4622	7.7735	8.6229	9.063	9.4892	10.093	10.413	10.912	11.659	12.063	12.581	13.06	13.241	13.35	13.812	14.769	14.927
0.47755	0.99739	1.5459	2.0951	2.5968	3.0677	3.5421	4.0597	4.5595	5.0012	5.4292	6.0498	6.5329	7.2072	7.5857	7.9515	8.5824	9.1191	9.4604	10.093	10.521	10.881	11.643	12.131	12.511	12.863	13.15	13.259	13.756	14.516	15.066
0.50186	1.0043	1.5459	2.0896	2.6221	3.033	3.5574	4.1601	4.6313	4.9728	5.3993	6.082	6.578	7.2192	7.4499	7.99	8.6094	9.091	9.5181	10.169	10.443	11.056	11.56	12.182	12.459	12.935	13.096	13.515	13.962	14.633	15.326
0.49773	1.0043	1.5277	2.1173	2.6347	3.0122	3.5881	4.1349	4.5684	4.9634	5.4093	6.0927	6.612	7.0878	7.5609	7.9771	8.475	9.091	9.6488	10.154	10.614	11.04	11.428	11.927	12.424	12.792	13.132	13.515	13.981	14.555	15.165
0.48755	0.98707	1.4962	2.0896	2.5842	3.0538	3.565	4.1265	4.6043	4.9445	5.3993	6.0284	6.5667	7.1116	7.5114	7.8876	8.542	9.0072	9.6926	10.154	10.474	10.77	11.527	12.046	12.337	12.792	13.114	13.756	14.019	14.535	14.947
0.49568	0.97683	1.5007	2.0404	2.6094	3.033	3.5193	4.1433	4.5595	5.0392	5.4292	6.0605	6.646	7.1116	7.4499	8.0028	8.5152	8.9655	9.7954	10.154	10.505	11.201	11.61	12.046	12.476	12.845	13.114	13.552	13.981	14.323	15.105
0.50601	1.0043	1.5142	2.0731	2.6347	3.0122	3.4966	4.1013	4.5149	5.0107	5.3695	5.9433	6.7031	7.2312	7.4254	8.0286	8.5824	9.049	9.7366	10.305	10.629	11.056	11.659	11.944	12.424	12.81	13.186	13.368	14.037	14.516	15.046
0.50186	1.0147	1.5323	2.0731	2.5717	3.0677	3.5269	4.2279	4.5416	4.907	5.4692	5.9645	6.6688	7.1952	7.4991	7.8114	8.475	9.077	9.678	10.063	10.536	10.992	11.593	11.877	12.389	12.792	12.988	13.423	13.924	14.342	15.066
0.48755	0.99394	1.5368	2.0896	2.5968	2.9847	3.489	4.2279	4.5327	4.9352	5.4793	6.0712	6.646	7.0759	7.4254	7.9131	8.4216	8.9655	9.678	10.214	10.428	11.347	11.709	11.911	12.337	12.774	13.042	13.533	14.151	14.516	15.066
0.4916	1.0043	1.5007	2.0622	2.5968	3.0468	3.5117	4.0846	4.5416	4.9634	5.4793	6.0071	6.6574	7.1712	7.4132	7.9515	8.6094	8.9101	9.7073	10.305	10.382	11.168	11.676	12.165	12.355	12.616	13.078	13.515	14.056	14.419	15.105
0.49773	1.0113	1.5232	2.0731	2.553	2.9985	3.5345	4.177	4.5149	4.9634	5.5195	6.0284	6.6006	7.1832	7.4622	7.8876	8.6635	8.8824	9.6488	10.275	10.367	10.992	11.643	12.012	12.459	12.81	12.988	13.241	13.793	14.439	15.225
0.48554	0.98365	1.5414	2.0622	2.6094	3.026	3.5421	4.1181	4.5238	5.0392	5.5803	6.0071	6.5667	7.2674	7.4376	7.8748	8.4483	8.8824	9.678	10.367	10.382	10.976	11.61	12.029	12.528	12.774	12.97	13.478	14	14.477	14.75
0.4916	0.99394	1.5414	2.0731	2.5968	3.033	3.5117	4.0763	4.5505	5.0012	5.6825	5.9751	6.5216	7.2192	7.4868	7.9131	8.475	8.9377	9.6488	10.214	10.413	10.976	11.412	12.08	12.651	12.81	12.845	13.441	14.019	14.477	15.165
0.48755	0.99739	1.5323	2.0026	2.6157	3.0607	3.5041	4.1433	4.5505	4.9823	5.5702	6.0284	6.4098	7.1593	7.3279	7.9259	8.4216	9.0211	9.6051	10.244	10.367	11.12	11.726	12.182	12.511	12.828	12.845	13.423	13.719	14.535	15.125
0.49364	0.99394	1.5187	2.0296	2.6284	3.033	3.5269	4.1517	4.5505	4.9917	5.5803	5.9433	6.5216	7.2072	7.4009	7.7861	8.4216	8.9794	9.5905	10.275	10.521	10.96	11.643	11.995	12.511	13.024	12.97	13.368	13.793	14.516	15.225
0.49979	0.97343	1.4917	2.0896	2.6157	3.033	3.5345	4.093	4.5684	5.0582	5.6109	5.8906	6.5216	7.2072	7.4499	8.0286	8.4483	9.0072	9.576	10.244	10.244	10.976	11.61	12.08	12.268	12.828	13.186	13.35	14.075	14.497	15.145
0.5081	0.99394	1.5187	2.1006	2.6221	3.0887	3.5193	4.1097	4.5774	5.0392	5.7031	5.9858	6.4767	7.1473	7.5733	8.0028	8.342	9.0211	9.6342	10.229	10.275	10.912	11.726	12.046	12.651	12.863	13.114	13.46	14.019	14.613	15.066
0.5102	1.0182	1.5097	2.0513	2.6031	3.0122	3.4139	4.0763	4.5684	5.0678	5.6109	5.9222	6.5441	7.1832	7.5485	7.8748	8.3818	8.9655	9.576	10.108	10.29	11.056	11.693	11.978	12.493	13.132	12.899	13.533	13.774	14.555	15.006
0.48957	0.97343	1.5097	2.0677	2.5467	3.0468	3.489	4.093	4.5505	5.1253	5.6007	5.9858	6.5104	7.1354	7.5238	7.8367	8.3552	8.8963	9.547	10.229	10.321	11.12	11.676	11.961	12.598	12.792	12.97	13.552	13.906	14.613	15.285
0.49979	0.99739	1.5187	2.0622	2.5968	2.9916	3.4664	4.0763	4.6856	5.0582	5.5702	6.0605	6.4879	7.0759	7.4622	7.8621	8.3024	8.8824	9.5615	10.26	10.521	11.088	11.659	11.877	12.424	12.651	13.06	13.496	14	14.594	15.346
0.4916	0.9905	1.4917	2.0731	2.5842	3.0677	3.5041	4.177	4.6856	5.0392	5.6007	6.0071	6.4544	7.0404	7.4376	7.9131	8.2892	8.7999	9.6196	10.26	10.552	10.928	11.577	12.063	12.476	12.739	12.988	13.607	13.943	14.769	15.265
0.48153	1.0394	1.5643	2.0841	2.6031	2.971	3.4966	4.1433	4.8511	5.0487	5.6313	5.9433	6.3765	7.1832	7.4376	7.9643	8.4083	9.091	9.5325	10.26	10.536	11.056	11.659	11.877	12.581	12.81	12.952	13.478	13.774	14.73	15.125
0.48153	0.98024	1.5187	2.0513	2.6031	2.9779	3.4966	4.2109	4.6765	5.0678	5.5195	5.9645	6.4321	7.0641	7.4009	7.9387	8.4216	9.049	9.446	10.108	10.676	10.865	11.577	11.961	12.616	12.704	13.06	13.515	13.962	14.497	15.205
0.49364	1.0217	1.5097	2.035	2.6157	3.0957	3.5193	4.1433	4.5774	5.0012	5.5702	6.1142	6.4321	7.0878	7.4745	7.9131	8.395	8.9933	9.5181	10.048	10.614	10.976	11.626	11.927	12.406	12.686	12.97	13.386	13.774	14.516	15.085
0.49773	0.99394	1.5187	2.0622	2.6094	3.033	3.5269	4.0846	4.5327	5.0487	5.5905	6.1466	6.5329	7.1952	7.4254	7.9259	8.3024	9.0072	9.5036	10.078	10.583	10.944	11.626	11.995	12.372	12.721	13.114	13.259	13.774	14.381	15.185
0.48957	1.0147	1.5277	2.0567	2.6094	3.145	3.4966	4.1265	4.6043	5.0012	5.5398	5.9222	6.612	7.1952	7.4622	7.9515	8.435	9.1895	9.4892	10.123	10.505	10.992	11.709	12.012	12.598	12.721	13.042	13.46	13.887	14.516	15.026
0.48554	1.0113	1.5052	2.0677	2.6602	3.0122	3.5117	4.1349	4.6043	5.0202	5.5499	6.0498	6.5554	7.1832	7.5114	7.8876	8.395	9.049	9.4748	10.26	10.49	11.008	11.643	12.08	12.511	12.511	13.204	13.368	13.943	14.809	15.085
0.48755	1.0043	1.5187	2.0677	2.5717	2.9847	3.5269	4.1349	4.5416	5.0012	5.3993	6.0605	6.612	7.1473	7.5485	7.9515	8.4483	9.0211	9.5181	10.199	10.459	11.152	11.577	12.114	12.669	12.598	13.222	13.386	13.868	14.672	14.986
0.49568	0.97683	1.5277	2.0841	2.578	3.0677	3.489	4.0597	4.6675	5.0012	5.4893	6.0177	6.5667	7.1712	7.4622	7.9259	8.475	8.8824	9.5325	10.244	10.397	11.136	11.461	12.131	12.616	12.757	13.259	13.386	13.868	14.497	15.066
0.48153	1.0043	1.4962	2.0677	2.6923	3.0399	3.4739	4.1349	4.5595	5.0202	5.4793	6.0498	6.5667	7.1952	7.3644	7.8748	8.342	8.8963	9.5615	10.321	10.521	10.849	11.544	12.165	12.546	12.669	13.259	13.496	13.868	14.4	15.185
0.47361	0.98707	1.5597	2.0786	2.6284	3.0538	3.4814	4.1181	4.6313	5.0582	5.4994	5.9858	6.6574	7.2072	7.5485	7.9515	8.6229	9.0351	9.547	10.305	10.413	10.817	11.544	12.303	12.633	12.686	13.096	13.533	13.924	14.477	15.245
0.48353	0.98024	1.5414	2.0896	2.6284	3.0399	3.4664	4.1433	4.4707	5.0678	5.6313	5.9751	6.6233	7.2192	7.5485	7.8621	8.5689	8.9933	9.5181	10.169	10.428	11.008	11.56	12.182	12.598	12.669	13.277	13.57	14	14.594	15.285
0.48353	1.0182	1.5232	2.1395	2.6221	3.0817	3.4589	4.1601	4.6133	5.0297	5.5803	5.9645	6.646	7.1593	7.4991	7.9387	8.542	9.0072	9.4029	10.033	10.413	11.072	11.86	12.063	12.493	12.774	12.757	13.533	13.849	14.497	15.306
0.4658	1.0182	1.5277	2.162	2.5905	3.033	3.4513	4.1433	4.5774	5.0202	5.5803	5.9858	6.6233	7.1832	7.4376	8.0803	8.6907	8.9239	9.3886	10.305	10.413	11.072	11.544	12.097	12.441	12.739	13.114	13.552	13.756	14.594	15.406
0.46969	1.0043	1.5097	2.1117	2.5592	3.026	3.5345	4.1265	4.5595	5.0297	5.5297	5.9539	6.6574	7.1235	7.34	8.0157	8.6364	8.8687	9.4316	10.397	10.382	11.12	11.626	12.097	12.493	12.739	13.024	13.386	13.793	14.535	15.326
0.47558	1.0182	1.5142	2.0896	2.6411	2.9985	3.5498	4.0348	4.5505	5.0773	5.6007	6.1035	6.6917	7.0168	7.3887	8.0157	8.7179	9.063	9.4892	10.138	10.428	11.104	11.544	12.08	12.389	12.774	13.186	13.405	13.774	14.75	15.285
0.47755	1.0113	1.5007	2.134	2.5842	3.0538	3.5957	4.0846	4.5416	5.1061	5.5702	6.1035	6.8414	7.1473	7.4376	8.0544	8.6229	9.1472	9.4892	10.018	10.382	11.04	11.626	12.182	12.493	12.774	13.078	13.405	13.868	14.555	14.986
0.46969	1.0147	1.5097	2.1173	2.5717	3.0468	3.6112	4.1013	4.5238	5.0678	5.5803	6.0284	6.6688	7.2072	7.4868	8.1452	8.395	9.0211	9.4604	10.078	10.459	11.088	11.659	12.046	12.721	13.222	13.35	13.423	13.812	14.613	15.185
0.4916	1.0253	1.4917	2.1006	2.5842	3.0468	3.5727	4.1433	4.5505	5.0582	5.6109	6.0284	6.6233	7.2312	7.5238	8.1192	8.5689	9.0211	9.4172	10.063	10.428	10.992	11.776	12.012	12.511	12.616	13.132	13.405	13.868	14.633	15.225
0.48755	1.0043	1.5097	2.0731	2.5842	3.0399	3.5193	4.0597	4.5684	5.0487	5.5803	6.0284	6.5554	7.0997	7.5361	8.1322	8.4083	9.1331	9.4172	10.229	10.459	11.024	11.593	11.944	12.337	12.97	13.168	13.423	13.774	14.907	15.165
0.48353	1.0008	1.4917	2.1173	2.5905	3.0468	3.565	4.1013	4.5953	5.0392	5.5499	6.0605	6.5554	7.1473	7.4622	8.2104	8.3818	8.9933	9.4748	10.169	10.428	11.024	11.61	11.944	12.511	12.988	13.024	13.313	13.812	14.947	15.165
0.48554	1.0043	1.5187	2.1006	2.6094	3.0817	3.565	4.1601	4.5774	5.0678	5.5195	5.9964	6.5667	7.1712	7.4745	8.0544	8.4083	9.0351	9.576	10.123	10.336	11.056	11.511	11.944	12.097	12.774	13.078	13.241	13.962	15.006	15.066
0.48353	1.0008	1.5277	2.0896	2.6221	3.0399	3.5804	4.1685	4.6133	5.0582	5.5095	6.0071	6.5893	7.1712	7.5361	8.0932	8.5152	9.0211	9.6196	10.184	10.336	10.944	11.659	11.927	12.581	12.757	13.078	13.295	13.943	14.555	14.986
0.48755	1.0147	1.5323	2.0841	2.6794	3.0122	3.5193	4.1855	4.6133	5.0392	5.5702	5.9964	6.5893	7.2312	7.6604	8.0286	8.3818	9.2177	9.6342	10.169	10.29	10.928	11.676	11.86	12.406	12.686	13.078	13.515	13.774	14.907	15.105
0.49568	1.0288	1.5414	2.0951	2.6094	3.1168	3.5193	4.2878	4.6403	5.1061	5.4592	6.082	6.6006	7.3158	7.4499	8.0803	8.5018	9.063	9.678	10.229	10.169	10.802	11.61	11.776	12.389	12.757	13.132	13.386	13.756	14.907	15.225
0.4916	0.9905	1.5323	2.1563	2.5968	3.033	3.6654	4.1939	4.6133	4.8977	5.5398	5.9645	6.5893	7.2795	7.5114	8.0544	8.435	9.105	9.6634	10.184	10.413	10.77	11.676	11.877	12.424	12.774	12.988	13.405	13.943	14.966	15.085
0.5102	0.99394	1.5052	2.1507	2.6221	3.033	3.5345	4.177	4.7038	5.0392	5.7237	6.0071	6.5441	7.2072	7.5238	8.0286	8.5555	9.0351	9.6634	10.154	10.49	10.944	11.511	12.012	12.546	12.792	12.988	13.496	13.981	14.73	15.165
0.49773	1.0253	1.5232	2.0786	2.5717	3.0191	3.4966	4.1601	4.6494	4.8697	5.7031	5.9539	6.578	7.2674	7.4745	7.9515	8.4216	8.9101	9.6634	10.018	10.505	11.072	11.659	11.843	12.459	12.757	13.096	13.368	14.056	14.73	14.789
0.50601	0.99394	1.5007	2.0677	2.5717	3.0677	3.5345	4.1939	4.5416	4.8883	5.4994	5.9751	6.5667	7.2795	7.4868	7.9515	8.4483	8.9101	9.6926	10.078	10.521	10.976	11.593	11.927	12.546	12.739	13.132	13.46	14.132	14.555	14.769
0.50186	0.99739	1.5187	2.1062	2.5717	3.0957	3.6654	4.2964	4.5327	4.9445	5.56	6.0177	6.3765	7.3522	7.4745	8.0028	8.435	8.9933	9.7807	10.275	10.692	10.992	11.593	11.944	12.598	12.881	13.06	13.405	14.056	14.672	14.887
0.50601	0.97683	1.5232	2.1173	2.6094	3.0122	3.6112	4.1939	4.5238	5.1446	5.5297	5.9433	6.4544	7.3765	7.4991	8.0157	8.395	9.0351	9.7366	10.275	10.661	10.944	11.626	11.826	12.704	12.863	13.096	13.35	14.019	14.594	14.966
0.49773	0.99394	1.5643	2.1062	2.6284	2.9985	3.5804	4.1855	4.5416	4.9728	5.6517	5.9645	6.4879	7.3522	7.5361	8.1062	8.3288	9.0211	9.6196	10.169	10.521	10.912	11.511	11.944	12.528	12.792	13.042	13.186	14.056	14.516	14.947
0.4916	0.99739	1.5551	2.1117	2.5968	3.1238	3.6732	4.2024	4.5327	5.0773	5.5499	5.9433	6.6688	7.2795	7.4745	7.9771	8.4483	9.0351	9.6342	10.123	10.474	10.833	11.544	11.911	12.669	12.952	13.241	13.313	14.094	14.439	14.868
0.48957	0.9905	1.5459	2.0731	2.6284	3.0468	3.6035	4.177	4.6947	4.9823	5.5702	5.9328	6.612	7.2795	7.4009	8.0028	8.4884	8.7725	9.766	10.305	10.552	10.897	11.593	11.995	12.511	12.828	12.845	13.478	14.132	14.285	14.809
0.49773	0.99394	1.5232	2.1006	2.6157	3.0677	3.5345	4.2024	4.6765	5.0392	5.5195	5.9116	6.4544	7.3887	7.3279	8.0028	8.5689	9.1191	9.766	10.229	10.428	10.849	11.726	11.944	12.651	12.881	13.078	13.533	13.774	14.711	14.828
0.50186	0.98365	1.5643	2.0841	2.6221	3.0399	3.5957	4.177	4.6313	5.0487	5.56	5.8906	6.5667	7.2915	7.4254	7.99	8.5824	8.9101	9.6051	10.138	10.413	10.912	11.56	11.978	12.546	12.935	13.204	13.607	14.189	14.555	14.789
0.49568	1.0078	1.5643	2.0841	2.6475	3.0677	3.5957	4.2024	4.5505	5.0297	5.4893	5.9433	6.5329	7.3644	7.3887	8.0544	8.6907	9.049	9.4892	10.123	10.521	10.928	11.577	11.826	12.389	12.792	12.97	13.607	13.831	14.555	15.026
0.48755	1.0217	1.5643	2.0567	2.6094	3.0538	3.5804	4.1939	4.5774	4.954	5.4893	5.9539	6.5104	7.2192	7.3765	8.0544	8.6907	9.1472	9.6051	10.244	10.661	11.024	11.593	11.776	12.355	12.881	13.042	13.405	13.981	14.458	15.145
0.49568	0.98707	1.5597	2.035	2.6411	3.0468	3.5804	4.1855	4.6223	4.9634	5.5195	6.0284	6.5667	7.2433	7.3522	7.9259	8.6229	9.049	9.5905	10.184	10.49	11.152	11.527	12.012	12.511	12.828	12.97	13.57	13.943	14.574	15.185
0.49364	0.94652	1.5505	2.0458	2.5467	3.0538	3.565	4.1685	4.6043	5.0107	5.4492	6.1142	6.4992	7.2433	7.3522	7.99	8.5959	9.1472	9.6488	10.214	10.505	11.152	11.544	12.012	12.32	12.81	13.042	13.478	13.849	14.516	15.265
0.48554	0.9905	1.5277	2.0786	2.5968	2.9985	3.5498	4.1433	4.5774	4.9634	5.5398	6.0071	6.612	7.2192	7.3037	7.9387	8.65	9.0351	9.7073	10.048	10.521	11.233	11.577	12.148	12.441	12.828	13.078	13.515	13.887	14.73	15.285
0.49364	1.05	1.5368	2.1507	2.5905	3.026	3.5804	4.177	4.5238	4.9917	5.4893	5.9858	6.6347	7.1832	7.2433	7.9003	8.6229	9.063	9.4748	10.199	10.583	11.217	11.759	12.046	12.389	12.97	13.042	13.515	13.887	14.691	15.427
0.49979	1.0147	1.5414	2.0404	2.578	3.0122	3.6035	4.2279	4.6043	5.0297	5.4793	6.0071	6.5893	7.2795	7.1354	8.0286	8.8136	8.9377	9.6051	10.048	10.536	11.217	11.593	12.234	12.598	12.845	12.988	13.368	13.981	14.789	15.145
0.48353	0.98707	1.5277	2.1676	2.5717	2.9985	3.5574	4.1685	4.5774	5.1349	5.4592	6.0071	6.5104	7.1952	7.4622	8.0544	8.65	8.9239	9.8693	10.169	10.536	11.185	11.726	12.114	12.563	12.774	12.952	13.423	13.831	14.691	14.947
0.49773	0.98365	1.5097	2.0731	2.6094	3.0607	3.4814	4.2109	4.6584	5.0107	5.5195	6.0071	6.646	7.2433	7.5609	8.0673	8.542	8.9794	9.6051	10.063	10.583	11.33	11.776	12.148	12.528	12.774	12.97	13.386	13.981	14.789	15.125
0.49568	0.98024	1.5277	2.134	2.578	3.0468	3.3916	4.0431	4.6133	4.9823	5.4994	5.9964	6.5441	7.1354	7.2553	7.9387	8.6364	9.049	9.5615	10.123	10.49	11.088	11.709	12.251	12.651	12.792	13.024	13.295	14	14.828	15.125
0.5102	0.9905	1.5323	2.0951	2.6538	3.026	3.5421	4.1265	4.6133	5.0392	5.4893	6.0498	6.3876	7.2795	7.4745	8.0157	8.4884	9.0211	9.7513	10.108	10.521	11.04	11.709	12.148	12.581	12.792	13.042	13.204	13.981	14.73	15.125
0.48957	0.98365	1.5142	2.0296	2.6094	3.026	3.5193	4.1181	4.6313	4.9164	5.5702	6.0605	6.4098	7.1593	7.3887	7.9259	8.342	9.049	9.576	10.063	10.536	10.992	11.793	12.08	12.633	12.739	13.006	13.332	13.906	14.828	15.145
0.48554	0.9905	1.5187	2.0567	2.6923	3.0538	3.489	4.0514	4.7771	4.9634	5.5702	6.1142	6.4098	7.2072	7.34	7.9643	8.4083	9.0351	9.5905	10.093	10.49	10.992	11.743	12.131	12.546	12.757	13.042	13.405	13.906	14.458	15.125
0.47755	0.97683	1.5277	2.0404	2.5968	3.0468	3.5041	4.1265	4.5327	5.0297	5.4994	6.1142	6.6688	7.2072	7.3887	7.824	8.5152	9.0351	9.7954	10.108	10.474	10.976	11.61	11.944	12.563	12.774	13.06	13.405	13.774	14.594	15.366
0.50601	0.97004	1.5597	2.0677	2.5654	3.0677	3.5193	4.2364	4.5863	5.0582	5.3398	6.0284	6.578	7.1832	7.3158	8.1062	8.5286	8.9655	9.5036	10.154	10.443	10.976	11.544	12.441	12.563	12.881	13.222	13.241	13.924	14.535	15.085
0.48957	1.0043	1.5097	2.1006	2.6347	3.0817	3.5574	4.093	4.6043	5.0487	5.4192	5.9964	6.6347	7.1235	7.5981	8.1712	8.6094	9.0211	9.5905	10.29	10.49	10.992	11.379	12.217	12.511	13.024	13.277	13.441	13.924	14.594	15.145
0.49773	1.0078	1.5232	2.0677	2.6347	3.0538	3.5421	4.1939	4.6584	5.0392	5.4793	6.0498	6.646	7.1354	7.4745	8.0803	8.4616	9.1331	9.5615	10.199	10.49	11.056	11.314	12.182	12.441	13.042	13.241	13.496	13.756	14.362	15.026
0.4916	0.9905	1.5097	2.1006	2.6284	3.0677	3.565	4.1349	4.6043	5.1253	5.4492	6.0605	6.6233	7.1473	7.4745	8.1974	8.5824	9.1331	9.678	10.123	10.428	11.185	11.282	12.097	12.355	12.863	13.204	13.552	13.774	14.516	15.145
0.5081	0.97004	1.5142	2.0841	2.6221	3.0399	3.5117	4.1181	4.6313	5.0678	5.4292	6.0071	6.578	7.1593	7.5238	8.0803	8.5824	9.1191	9.6196	10.214	10.428	11.056	11.33	12.012	12.511	12.845	13.114	13.496	13.831	14.809	15.145
0.50393	0.99739	1.5323	2.1062	2.6094	3.138	3.5574	4.0846	4.5416	4.9634	5.5803	6.0712	6.6006	7.1354	7.5981	8.0028	8.6635	9.0351	9.6051	10.033	10.552	11.104	11.412	12.182	12.424	12.757	13.15	13.405	13.812	14.613	15.225
0.49364	1.0323	1.5368	2.0731	2.6221	3.1521	3.5498	4.1855	4.6313	5.0392	5.5095	5.9433	6.5554	7.2674	7.5238	8.0415	8.5959	9.1895	9.766	10.138	10.336	11.201	11.347	11.978	12.563	12.721	13.06	13.441	13.887	14.574	15.105
0.48957	0.98365	1.5459	2.0622	2.6157	3.1168	3.565	4.1265	4.5774	5.0392	5.4893	5.9858	6.4656	6.9698	7.5114	8.0932	8.5689	9.1472	9.576	10.108	10.77	11.152	11.412	12.046	12.511	12.774	13.15	13.533	13.663	14.711	15.306
0.48755	1.0182	1.5232	2.0513	2.6031	3.0747	3.5269	4.1013	4.6313	5.0012	5.6109	6.0927	6.5216	6.9815	7.3522	8.0286	8.5018	9.1191	9.5181	10.108	10.382	11.008	11.428	11.86	12.528	12.704	13.132	13.496	13.793	14.711	15.447
0.49979	1.0008	1.5551	2.0841	2.6094	3.0677	3.5498	4.177	4.5774	5.2514	5.4692	5.9964	6.4767	7.1832	7.5238	8.0286	8.5018	9.1331	9.5181	10.184	10.614	10.992	11.428	12.012	12.528	12.686	12.114	13.478	13.849	14.672	15.085
0.48755	0.96666	1.4695	2.0841	2.5968	3.1097	3.5345	4.1685	4.5684	5.0678	5.4994	6.0498	6.5554	7.0404	7.5361	8.0932	8.5286	9.105	9.5905	10.305	10.598	10.881	11.478	12.046	12.633	12.774	12.988	13.386	13.737	14.594	15.245
0.49568	0.92996	1.5097	2.0513	2.5905	3.0747	3.489	4.093	4.5327	5.193	5.4893	6.1142	6.5554	7.1952	7.4991	8.1843	8.395	9.0351	9.547	10.123	10.707	10.96	11.527	11.978	12.285	12.739	13.024	13.46	13.924	14.477	15.026
0.48554	0.99739	1.5097	2.0677	2.6602	3.1027	3.4814	4.177	4.6313	5.0107	5.6109	6.0927	6.4656	7.1235	7.4132	7.9771	8.3552	8.9516	9.5036	10.199	10.49	10.96	11.56	11.944	12.563	12.721	13.006	13.313	13.924	14.594	15.125
0.5123	0.94652	1.5368	2.0731	2.5096	3.0747	3.5881	4.2194	4.7312	5.0392	5.56	6.0177	6.5554	7.2433	7.2915	8.1192	8.4616	8.9655	9.6488	10.063	10.598	10.992	11.61	11.961	12.476	12.686	12.899	13.368	13.7	14.633	15.225
0.50186	0.9905	1.5007	2.0786	2.6411	3.0538	3.5498	4.1939	4.5595	5.0487	5.5803	6.0391	6.5329	7.0404	7.5609	8.1062	8.4884	8.9933	9.446	10.018	10.521	11.04	11.511	11.927	12.686	12.845	12.881	13.405	14.094	14.652	15.145
0.50601	1.0113	1.5142	2.0677	2.5096	3.026	3.4513	4.1349	4.5953	4.8977	5.5702	6.0177	6.5667	7.1832	7.5609	8.2498	8.5286	8.9933	9.6051	9.8397	10.49	10.992	11.396	11.978	12.757	12.952	12.952	13.552	13.7	14.574	15.046
0.49773	0.9532	1.4917	2.0841	2.5717	3.033	3.5804	4.1097	4.5774	4.9258	5.56	6.1466	6.5893	7.1832	7.5485	8.1062	8.5286	8.9794	9.5615	10.108	10.567	10.944	11.282	11.995	12.406	12.863	12.952	13.441	13.962	14.419	15.185
0.49568	0.98365	1.5052	2.0786	2.6031	3.0677	3.5498	3.9119	4.5505	5.0107	5.56	6.0712	6.5216	7.1712	7.5609	8.0157	8.4483	9.0072	9.5615	9.7807	10.367	10.865	11.412	11.961	12.651	12.881	12.935	13.552	13.868	14.613	14.907
0.48755	0.96666	1.4962	2.0622	2.6221	3.0887	3.5269	4.2279	4.6133	5.0012	5.56	6.0391	6.5893	7.1832	7.6355	8.0544	8.3818	8.9794	9.5181	9.9287	10.676	10.739	11.347	12.182	12.476	12.828	13.006	13.368	13.46	14.73	14.927
0.50393	0.90388	1.5505	2.0188	2.5717	3.0957	3.5345	4.1433	4.7038	5.0012	5.5195	6.0177	6.612	7.1354	7.4499	8.1452	8.5286	9.0351	9.4316	10.214	10.428	10.96	11.298	12.029	12.581	12.935	13.078	13.552	13.793	14.652	15.145
0.52508	1.0113	1.5097	2.0134	2.6157	3.0399	3.6035	4.1517	4.5595	5.0107	5.5702	6.0605	6.5667	7.2072	7.5485	8.0157	8.5152	9.0072	9.4748	10.154	10.598	10.897	11.577	11.978	12.598	12.845	13.168	13.35	13.626	14.613	14.947
0.49364	1.0043	1.5052	2.0622	2.6031	3.0538	3.4739	4.1433	4.5953	5.0297	5.5398	6.0284	6.578	7.1712	7.5857	8.0028	8.5286	9.0351	9.4172	10.154	10.521	11.088	11.494	11.944	12.528	12.792	13.132	13.607	13.793	14.633	15.145
0.50393	0.96666	1.5323	2.0677	2.578	3.0677	3.4966	4.093	4.6043	4.954	5.7134	5.9751	6.6006	7.1473	7.4254	8.1192	8.5555	8.9933	9.5905	10.123	10.536	11.461	11.56	12.165	12.424	12.792	13.006	13.644	13.774	14.535	15.085
0.5081	1.0572	1.5597	2.0567	2.5654	3.1097	3.5269	4.1349	4.7221	4.9634	5.56	6.0498	6.646	7.2192	7.5361	8.0286	8.5555	9.063	9.5181	10.078	10.443	11.04	11.511	11.894	12.406	12.899	12.935	13.277	13.831	14.516	15.145
0.48957	1.0008	1.4962	2.0896	2.5905	3.0887	3.565	4.1097	4.6584	4.9917	5.5095	6.0177	6.4656	7.2433	7.4745	8.0932	8.4216	9.0072	9.5325	10.033	10.397	10.865	11.56	11.927	12.441	12.988	13.204	13.607	13.887	14.4	15.006
0.48353	0.97004	1.5828	2.0567	2.6031	3.0817	3.5498	4.0266	4.6313	4.9728	5.5297	5.9964	6.5667	7.2072	7.4132	8.0157	8.3156	9.091	9.4604	10.154	10.49	11.024	11.56	11.978	12.669	12.899	13.168	13.663	13.793	14.4	15.046
0.49773	0.97343	1.4739	2.0951	2.6666	3.033	3.5117	4.1265	4.5416	4.9634	5.4893	6.0498	6.4879	7.2192	7.5485	8.0932	8.4216	8.9655	9.5036	10.138	10.459	11.152	11.577	11.995	12.493	12.739	13.114	13.756	13.793	14.73	15.105
0.49773	0.95991	1.5232	2.1062	2.6031	3.0538	3.5117	4.177	4.6494	4.907	5.4793	5.9645	6.4992	7.0404	7.5238	8.1322	8.6229	8.9794	9.5615	10.154	10.583	10.897	11.577	12.148	12.774	12.899	13.168	13.132	13.868	14.691	15.105
0.48957	0.95991	1.5097	2.0404	2.5158	3.0677	3.5881	4.1433	4.5416	4.9164	5.4692	6.0498	6.4992	7.1235	7.4622	8.0673	8.475	9.063	9.5036	10.229	10.459	11.088	11.56	12.046	12.511	12.863	13.114	13.423	13.906	14.574	15.205
0.49773	0.98365	1.5052	2.0567	2.5467	3.0468	3.5498	4.1265	4.5953	5.0012	5.4392	6.125	6.4656	7.1712	7.4745	8.0932	8.5689	9.049	9.576	10.184	10.49	11.04	11.56	11.961	12.686	12.917	12.988	13.405	13.906	14.439	15.125
0.49364	0.97343	1.5277	2.0677	2.6221	3.0538	3.5957	4.1097	4.6765	4.9258	5.4093	6.0498	6.5104	7.1832	7.4991	8.0803	8.6094	9.049	9.5615	10.169	10.459	11.04	11.643	11.911	12.563	12.739	13.259	13.533	13.887	14.477	15.346
0.48353	1.0008	1.5414	2.0677	2.5842	3.0887	3.5193	4.2109	4.6133	5.0202	5.3993	6.1575	6.5104	7.1712	7.4991	8.2235	8.6094	9.0351	9.4604	10.214	10.321	11.104	11.56	11.978	12.459	12.81	13.204	13.423	13.962	14.516	15.245
0.48353	0.9905	1.5368	2.0513	2.5592	3.0887	3.565	4.1097	4.6403	4.9728	5.3894	6.0605	6.5667	7.1712	7.5361	8.1974	8.5689	9.063	9.5905	10.154	10.505	11.088	11.527	12.063	12.476	12.721	13.204	13.405	13.962	14.477	15.306
0.48957	0.95656	1.5368	2.0841	2.578	3.1097	3.4966	4.0597	4.6313	4.9445	5.4392	6.0177	6.5441	7.1712	7.5114	8.0544	8.5689	9.105	9.6196	10.214	10.474	11.04	11.626	12.029	12.424	12.721	13.114	13.533	13.962	14.381	15.386
0.48153	0.96328	1.4917	2.1117	2.6157	3.0957	3.5727	4.1181	4.6313	5.0012	5.4994	5.9964	6.5667	7.1235	7.5361	8.0673	8.6094	9.1754	9.5615	10.123	10.505	11.008	11.577	11.961	12.424	12.81	13.078	13.589	13.793	14.497	14.927
0.48755	1.0288	1.5232	2.1062	2.5968	3.0538	3.5421	4.0348	4.5684	5.0582	5.4692	5.9539	6.5329	7.1354	7.5609	8.0803	8.5286	9.077	9.6051	10.154	10.397	10.976	11.61	11.961	12.441	12.81	12.97	13.423	13.626	14.516	15.006
0.47755	0.95656	1.4962	2.1284	2.5281	3.0887	3.4814	4.1855	4.5863	4.9728	5.4592	5.9539	6.612	7.2072	7.5361	8.0803	8.475	9.077	9.6488	10.169	10.583	10.976	11.544	12.114	12.355	12.952	13.024	13.496	13.849	14.381	14.966
0.48755	1.0394	1.5323	2.0896	2.5905	3.0817	3.5117	4.1517	4.6494	5.0012	5.3102	6.0391	6.6347	7.1832	7.5609	7.9771	8.5286	9.077	9.4604	10.169	10.552	10.96	11.577	12.08	12.406	12.81	13.15	13.386	13.962	14.4	15.105
0.48957	0.96328	1.5187	2.0513	2.6347	3.0677	3.5727	4.0597	4.6313	4.9445	5.4492	6.0605	6.7146	7.2433	7.4991	8.0803	8.5824	9.2319	9.4604	10.29	10.567	10.992	11.61	11.978	12.459	12.81	13.078	13.35	13.831	14.419	15.487
0.48153	1.0394	1.5323	2.0841	2.5717	3.0887	3.6889	4.1517	4.6223	4.9917	5.4592	5.8591	6.612	7.1712	7.34	7.9643	8.475	9.3171	9.4892	10.229	10.552	11.008	11.593	12.251	12.355	12.441	13.006	13.295	13.831	14.381	15.165
0.49364	0.99739	1.5551	2.0567	2.5842	3.0399	3.489	4.1685	4.5863	4.9823	5.5195	6.1142	6.7031	7.2192	7.5114	7.9131	8.435	9.2036	9.4748	10.275	10.505	11.088	11.56	11.944	12.32	12.792	13.042	13.386	13.831	14.285	15.265
0.49364	0.99394	1.5323	2.0404	2.6031	3.0887	3.5117	4.2024	4.6494	5.0582	5.4093	6.0177	6.6233	6.9933	7.3644	7.9515	8.4083	9.063	9.5615	10.214	10.521	11.056	11.676	11.894	12.234	12.863	13.15	13.35	13.663	14.477	14.613
0.48957	0.95656	1.4873	2.035	2.5842	3.0747	3.489	4.0846	4.6133	5.0869	5.3596	6.0605	6.5667	7.34	7.4499	7.9003	8.3818	9.0351	9.5325	10.275	10.49	10.944	11.577	11.978	12.251	12.917	13.06	13.441	13.737	14.458	15.165
0.4916	1.0043	1.5505	2.0188	2.6411	3.0747	3.4513	4.1097	4.6223	5.0869	5.4793	6.0498	6.5667	7.2072	7.5981	7.9771	8.5152	9.049	9.6342	10.244	10.536	10.661	11.659	12.08	12.303	12.721	12.935	13.533	13.644	14.477	15.145
0.50601	0.92668	1.4739	2.0296	2.6031	3.0677	3.5041	4.1013	4.6223	5.0107	5.4994	6.0284	6.5104	7.1235	7.4254	7.9771	8.4483	8.9377	9.5905	10.244	10.428	11.12	11.577	11.995	12.285	12.952	13.06	13.241	13.849	14.633	15.306
0.5102	1.0536	1.5368	2.0404	2.6157	2.9985	3.5269	4.1433	4.6856	4.9634	5.3596	5.9328	6.4656	7.2192	7.3887	8.0028	8.5286	8.9655	9.547	10.26	10.474	11.12	11.527	11.978	12.148	12.81	13.114	13.313	13.774	14.594	15.145
0.51441	0.94652	1.5277	2.0404	2.5905	3.0538	3.4966	4.0846	4.6133	5.0107	5.4692	5.9964	6.4656	7.0286	7.3887	8.0932	8.5824	8.9101	9.6196	10.199	10.49	11.168	11.461	12.08	12.217	12.774	13.096	13.204	13.756	14.574	14.887
0.50601	0.98365	1.5459	2.0677	2.5968	2.9985	3.5345	4.0763	4.6133	4.8977	5.5398	5.9433	6.578	7.2312	7.3887	8.1712	8.6229	8.9377	9.6051	10.367	10.505	11.024	11.593	11.995	12.285	12.739	12.704	13.46	13.812	14.574	15.326
0.5102	1.0608	1.5597	2.0458	2.673	3.0817	3.6035	4.093	4.5953	4.9352	5.56	5.9539	6.5441	7.1354	7.4009	8.2235	8.65	9.0072	9.5905	10.428	10.521	11.104	11.511	11.944	12.303	12.633	12.721	13.368	13.793	14.555	15.386
0.5102	0.97683	1.5142	2.0296	2.6538	3.0191	3.5727	4.1097	4.6313	4.9445	5.5499	6.0071	6.4992	7.2192	7.4254	8.0803	8.6364	8.9516	9.3029	10.505	10.583	10.912	11.577	12.046	12.337	12.651	12.988	13.405	13.607	14.439	15.046
0.51653	1.0825	1.5142	2.008	2.5968	3.0399	3.4589	4.093	4.6584	4.9634	5.5702	5.9222	6.5216	7.3279	7.4868	8.1062	8.5959	8.9794	9.576	10.428	10.552	11.04	11.593	12.114	12.406	12.774	12.935	13.57	13.793	14.458	15.205
0.5102	0.99739	1.5097	2.0677	2.5467	3.0122	3.4364	4.1265	4.6313	4.907	5.5905	5.9645	6.4432	7.1235	7.4376	8.1062	8.6094	9.063	9.6926	10.184	10.552	11.152	11.461	12.165	12.424	12.757	12.952	13.096	13.812	14.535	15.066
0.49364	1.0465	1.5007	2.0896	2.6221	2.9985	3.4966	4.0431	4.5327	4.954	5.5905	5.9011	6.4432	7.1832	7.6105	8.0803	8.6364	9.091	9.7366	10.199	10.336	11.136	11.544	12.097	12.493	13.006	12.863	13.46	13.906	14.613	15.346
0.49568	0.97004	1.5597	2.0896	2.6284	3.0677	3.4814	4.0348	4.5505	4.9164	5.6313	5.8172	6.4879	7.1832	7.5485	8.0544	8.7043	9.105	9.6634	10.413	10.367	11.168	11.544	12.268	12.598	12.563	12.97	13.368	13.887	14.75	14.868
0.48755	1.0182	1.5232	2.1173	2.5842	3.0747	3.4513	4.1265	4.6043	4.9258	5.6109	5.9328	6.4879	7.2192	7.4622	7.9771	8.65	9.1331	9.7073	10.229	10.351	10.676	11.593	12.029	12.686	12.686	12.669	13.552	13.887	14.672	15.046
0.4916	1.0008	1.5505	2.0951	2.5343	3.033	3.5117	4.1517	4.5953	4.9917	5.6007	5.9964	6.4209	7.1473	7.3765	7.99	8.5555	9.063	9.8102	10.214	10.413	11.072	11.445	12.012	12.828	12.774	12.774	13.441	13.906	14.594	14.947
0.49979	1.0008	1.5414	2.134	2.6157	3.0607	3.565	4.1517	4.5774	4.9823	5.5905	6.0498	6.4432	7.1952	7.4868	7.9771	8.6907	9.091	9.7073	10.214	10.536	11.088	11.396	12.148	12.721	12.704	12.792	13.259	13.774	14.691	15.066
0.48353	0.98707	1.5097	2.1062	2.5968	3.0399	3.565	4.177	4.6223	4.907	5.5702	6.0177	6.3434	7.0641	7.4868	7.9771	8.5018	9.105	9.7954	10.184	10.552	11.088	11.363	12.148	12.546	12.774	12.881	13.295	13.887	14.555	15.165
0.48554	1.0253	1.5142	2.0841	2.7052	3.0399	3.5498	4.1433	4.6043	4.8418	5.5803	5.9433	6.3544	7.1593	7.3522	7.9515	8.5689	9.077	9.678	10.138	10.521	11.088	11.428	12.182	12.616	12.598	13.006	13.405	13.887	14.535	15.145
0.48153	0.99394	1.5007	2.0513	2.6284	3.0677	3.5498	4.1349	4.5684	4.954	5.6517	5.9858	6.4321	7.0878	7.4745	7.9387	8.435	8.9655	9.8249	10.184	10.567	11.072	11.396	12.355	12.704	12.828	12.952	13.423	13.924	14.613	15.225
0.47755	1.0147	1.5368	2.0896	2.5842	3.0607	3.5574	4.1097	4.5416	5.0012	5.6211	5.9011	6.5216	7.1116	7.4868	7.99	8.5824	9.049	9.7513	10.108	10.552	11.104	11.445	12.114	12.528	12.917	12.863	13.46	13.943	14.555	15.205
0.46003	1.0716	1.5277	2.0513	2.5968	3.026	3.5881	4.093	4.5774	5.0392	5.4692	5.9858	6.4321	7.1712	7.4745	8.0286	8.5286	8.9516	9.7807	10.078	10.567	11.056	11.494	12.234	12.669	12.828	12.917	13.496	14.075	14.555	15.205
0.45432	0.96666	1.5187	2.0458	2.5905	3.1027	3.5269	4.1181	4.5774	4.9634	5.5095	5.9858	6.4767	7.2553	7.4991	8.0544	8.5555	8.9794	9.7219	9.9883	10.567	11.168	11.396	12.182	12.633	12.81	12.917	13.57	14.075	14.535	15.125
0.48153	1.0536	1.4784	2.0513	2.6347	3.0468	3.5117	4.1097	4.5774	4.9445	5.6825	5.9858	6.4098	7.1712	7.5361	8.0673	8.5824	8.9933	9.8397	10.169	10.521	11.136	11.445	12.148	12.581	12.881	12.952	13.405	13.981	14.613	15.346
0.47558	0.9532	1.5097	2.0242	2.673	3.0607	3.4739	4.1013	4.5684	4.954	5.5095	5.9964	6.4767	7.2795	7.5238	8.0803	8.5689	8.9794	9.7073	10.093	10.521	11.104	11.428	12.08	12.651	12.881	13.096	13.515	14	14.574	15.326
0.48353	1.0113	1.5323	2.0786	2.6602	3.0817	3.4289	4.0763	4.4795	4.9917	5.6007	6.0927	6.5554	7.2192	7.4868	8.0028	8.5286	8.9794	9.6196	10.26	10.428	10.928	11.776	12.012	12.598	12.828	13.042	13.496	13.981	14.594	15.306
0.48153	1.0008	1.4917	2.0786	2.6475	3.0677	3.5193	4.1433	4.4531	4.9917	5.4093	6.0712	6.5329	7.1952	7.5114	8.0028	8.5689	9.1472	9.5905	10.199	10.459	11.04	11.894	12.08	12.616	12.721	12.988	13.552	13.962	14.574	15.066
0.48353	0.99739	1.5232	2.0188	2.6347	3.0468	3.5574	4.1855	4.5595	4.954	5.6723	6.0712	6.578	7.1832	7.4745	8.0286	8.4216	9.0211	9.6342	10.169	10.567	10.881	11.877	11.978	12.757	12.828	13.024	13.552	13.981	14.594	15.185
0.48554	0.97343	1.5551	2.008	2.6666	3.0191	3.5041	4.068	4.6133	4.954	5.5499	6.082	6.612	7.2915	7.4622	8.1452	8.4884	8.9239	9.7073	10.184	10.552	11.04	11.494	11.978	12.81	12.721	13.132	13.35	13.906	14.672	15.265
0.48957	1.0043	1.5505	2.035	2.6538	3.0399	3.4814	4.0763	4.6494	4.954	5.7031	6.0605	6.5329	7.1712	7.4745	8.1974	8.5018	8.9794	9.7366	10.26	10.49	11.12	11.428	11.961	12.757	12.774	13.006	13.423	13.849	14.769	15.265
0.48957	0.97004	1.5277	2.0296	2.6094	3.0677	3.489	4.1097	4.6403	4.8325	5.6723	6.0605	6.4544	7.2072	7.4499	8.2104	8.4483	9.049	9.5905	10.29	10.459	11.056	11.659	12.029	12.651	12.669	13.006	13.313	13.812	14.769	15.346
0.48957	1.0078	1.5277	2.0731	2.5968	3.0191	3.489	4.0846	4.6313	4.8325	5.4994	6.0712	6.4656	7.1235	7.3887	8.0286	8.475	9.063	9.576	10.275	10.645	11.088	11.61	12.063	12.739	12.686	12.952	13.478	13.793	14.789	15.225
0.48353	0.97004	1.5142	2.0458	2.6411	3.033	3.5117	4.0266	4.6313	4.907	5.6007	6.0284	6.612	7.0878	7.4499	8.0286	8.5824	9.0351	9.7073	10.275	10.336	11.024	11.511	12.131	12.669	12.774	12.899	13.496	13.793	14.809	15.225
0.47165	0.97004	1.5187	2.0677	2.5842	3.0538	3.5269	4.0597	4.6494	4.9164	5.56	5.9645	6.5893	7.1832	7.4376	8.0803	8.435	9.0211	9.6051	10.184	10.629	10.944	11.593	12.165	12.563	12.721	12.917	13.515	13.812	14.672	15.245
0.47755	0.93656	1.5735	2.0296	2.5968	3.0538	3.5117	4.0597	4.6223	4.9164	5.5398	6.0071	6.6006	7.0878	7.4622	8.0803	8.5152	9.0072	9.6634	10.199	10.567	10.96	11.676	12.012	12.633	12.828	13.024	13.478	13.906	14.594	15.185
0.47361	1.0008	1.5689	2.0567	2.6347	3.026	3.489	4.1181	4.5953	4.8977	5.5095	5.9116	6.578	6.9463	7.4622	8.0157	8.5152	8.7589	9.4892	10.078	10.614	10.976	11.643	11.978	12.598	12.739	12.952	13.607	13.7	14.652	15.026
0.48755	1.0217	1.6014	2.0404	2.6157	3.0399	3.5041	4.0763	4.6856	4.9445	5.4692	5.9751	6.578	6.9933	7.4254	7.9643	8.395	8.8274	9.4172	10.033	10.614	10.928	11.511	12.251	12.581	12.757	12.952	13.496	13.793	14.672	14.947
0.47165	0.94986	1.5597	2.035	2.5592	3.0122	3.5041	4.1013	4.6043	4.9164	5.4893	5.9116	6.5104	7.0404	7.4254	7.9515	8.5555	8.9239	9.5036	10.321	10.474	11.056	11.544	12.097	12.581	12.774	12.845	13.46	13.719	14.672	14.887
0.48554	1.0358	1.5689	2.0513	2.5717	3.0677	3.6344	4.0597	4.6584	4.9352	5.4793	5.9964	6.5216	6.958	7.4254	7.99	8.475	8.9655	9.5181	10.154	10.351	11.024	11.626	12.046	12.633	12.81	12.988	13.46	13.681	14.711	14.927
0.47954	0.95991	1.5277	2.1507	2.5096	3.0607	3.6035	4.1181	4.5863	4.9917	5.4893	5.9539	6.5893	7.1116	7.4254	8.0803	8.5824	8.8824	9.6488	10.123	10.459	10.865	11.56	12.012	12.528	12.845	12.863	13.57	13.831	14.594	14.927
0.48554	0.97683	1.5052	2.0622	2.5905	3.0399	3.5498	4.0431	4.5774	4.9352	5.4192	5.9751	6.6688	7.0286	7.4991	8.0544	8.5959	9.0351	9.547	10.321	10.397	11.056	11.61	12.046	12.845	12.899	12.917	13.46	13.774	14.672	15.165
0.48153	0.97343	1.5277	2.035	2.5905	3.0399	3.5041	4.0266	4.4707	4.879	5.4592	5.9328	6.612	7.0404	7.5114	8.0286	8.5555	9.077	9.5036	10.154	10.397	11.12	11.577	12.08	12.424	12.863	12.988	13.405	13.812	14.652	15.165
0.4916	1.0358	1.4695	2.0513	2.5467	3.033	3.565	4.1265	4.5061	4.9164	5.4392	5.9645	6.6347	7.0286	7.5485	8.2235	8.6094	9.063	9.4892	10.184	10.49	11.314	11.445	12.012	12.285	12.651	13.132	13.332	13.924	14.711	15.026
0.4916	0.96328	1.5232	2.0622	2.5592	3.0538	3.5957	4.1181	4.5863	4.8047	5.4093	5.9433	6.646	7.0759	7.5733	7.9771	8.5286	9.105	9.5615	10.093	10.428	11.217	11.461	12.114	12.165	12.633	13.168	13.405	13.962	14.691	15.245
0.49364	0.94652	1.5323	2.0622	2.5654	3.0191	3.5804	4.1517	4.7404	4.9352	5.5905	5.9011	6.646	7.1712	7.3279	8.0415	8.4884	9.1613	9.5036	10.229	10.413	11.056	11.396	12.182	12.633	12.721	12.952	13.478	13.7	14.691	14.966
0.48554	0.98365	1.5414	2.0513	2.5592	3.0399	3.5498	4.1265	4.7404	4.879	5.4994	5.8486	6.5329	7.1473	7.5361	8.0157	8.475	9.049	9.6488	10.244	10.49	11.072	11.428	12.097	12.757	12.845	12.935	13.681	13.812	14.574	14.986
0.52508	1.0572	1.5368	2.0841	2.5968	2.971	3.5804	4.068	4.5863	5.0107	5.5195	5.8906	6.5329	7.2312	7.4376	8.0544	8.4616	9.1331	9.547	10.29	10.598	11.152	11.347	12.285	12.476	12.774	13.06	13.313	13.906	14.535	15.066
0.49773	0.9905	1.5368	2.0731	2.5968	3.0817	3.565	4.1685	4.5416	5.0678	5.4592	6.0177	6.5893	7.1952	7.4499	7.9643	8.542	9.049	9.6634	10.229	10.552	11.152	11.461	12.355	12.493	12.686	13.06	13.368	13.737	14.691	15.085
0.51865	0.97343	1.5142	2.0786	2.6031	2.9847	3.5727	4.1517	4.5774	4.9258	5.5398	6.0605	6.5554	7.2072	7.6604	8.0286	8.542	9.105	9.678	10.138	10.505	11.04	11.494	12.182	12.406	12.633	13.132	13.332	13.756	14.73	14.966
0.48755	0.91035	1.4784	2.0458	2.5968	3.033	3.5498	4.0846	4.5505	4.9445	5.5499	6.0712	6.4432	7.1832	7.4745	7.9515	8.4483	9.2602	9.6634	10.169	10.336	10.992	11.577	11.961	12.651	12.792	12.97	13.295	13.831	14.75	15.085
0.5102	0.9432	1.5187	2.0458	2.6157	3.0677	3.5498	4.1433	4.6403	4.9445	5.5195	6.0391	6.6574	7.1712	7.5361	8.0415	8.542	9.2319	9.678	10.214	10.536	10.897	11.626	11.911	12.739	12.721	13.078	13.332	13.981	14.613	14.848
0.48755	1.0429	1.5097	2.0786	2.6284	3.0677	3.6266	4.1181	4.6675	4.954	5.5803	5.9539	6.5329	7.1235	7.4132	7.9003	8.5689	9.1895	9.766	10.214	10.459	10.723	11.626	11.826	12.493	12.774	12.97	13.332	13.887	14.535	15.046
0.48153	1.0182	1.5007	2.134	2.6794	3.0817	3.6499	4.1013	4.6043	4.8883	5.7652	6.0927	6.6233	7.1593	7.4991	7.99	8.5689	8.8687	9.5325	10.26	10.49	10.849	11.61	11.894	12.476	12.792	13.078	13.46	14.056	14.477	15.165
0.48755	0.97683	1.5052	2.0786	2.6923	3.033	3.5345	4.0431	4.5863	4.9917	5.5702	6.0712	6.578	7.1832	7.4745	7.9003	8.5824	9.049	9.6196	10.321	10.459	11.024	11.676	12.029	12.389	12.651	13.024	13.259	13.831	14.594	15.125
0.48554	1.0288	1.5097	2.0513	2.6602	3.0887	3.565	4.245	4.5953	4.9352	5.5702	6.0605	6.5104	7.1473	7.4499	7.8621	8.5152	8.8549	9.5615	10.199	10.367	10.928	11.61	12.029	12.459	12.598	12.988	13.204	13.906	14.555	15.125
0.49364	1.0465	1.5007	2.0896	2.6031	3.1027	3.565	4.0763	4.6403	4.9823	5.4692	6.082	6.6006	7.1952	7.6355	7.8621	8.7862	9.063	9.5905	10.49	10.397	10.992	11.626	12.046	12.32	12.669	13.078	13.46	13.906	14.535	15.185
0.49364	0.97683	1.5187	2.0951	2.6347	3.0677	3.6035	4.1013	4.5953	4.9634	5.56	6.0605	6.578	7.2072	7.4622	7.9387	8.5152	9.091	9.3456	10.184	10.413	10.897	11.544	12.063	12.389	12.863	13.114	13.607	13.831	14.439	15.245
0.49364	0.97683	1.5007	2.0896	2.5905	3.0677	3.5727	4.093	4.6403	4.9258	5.5499	6.1142	6.6006	7.2192	7.4868	8.0286	8.5152	9.1331	9.446	10.199	10.443	10.96	11.626	11.995	12.459	12.739	13.078	13.57	13.756	14.458	15.105
0.48554	0.9905	1.5277	2.1228	2.6094	3.0607	3.565	4.0597	4.5863	4.9258	5.5803	6.1575	6.6688	7.0997	7.5609	7.7861	8.6771	8.9794	9.678	10.244	10.443	10.912	11.659	12.063	12.528	12.757	13.114	13.589	13.812	14.907	15.346
0.48957	0.99739	1.5187	2.0026	2.6221	3.033	3.5498	4.068	4.6856	4.8977	5.5195	6.0177	6.6233	7.1593	7.6479	7.7482	8.4216	9.0211	9.5615	10.108	10.428	10.897	11.659	11.927	12.441	12.774	13.096	13.552	13.737	14.477	15.145
0.48153	1.0288	1.5232	2.0458	2.6157	3.033	3.565	4.0763	4.6403	4.954	5.5803	5.9858	6.578	7.1952	7.4868	7.9131	8.5286	9.063	9.5325	10.229	10.443	10.897	11.693	12.234	12.511	12.81	12.988	13.441	13.7	14.497	15.165
0.49364	0.96666	1.5232	2.0841	2.6221	3.026	3.565	4.0846	4.6223	4.9823	5.5702	6.0177	6.5667	7.2192	7.623	8.0415	8.5959	9.0351	9.6488	10.123	10.459	10.881	11.56	11.877	12.459	12.899	12.988	13.386	14.094	14.848	15.205
0.48353	1.0008	1.5097	2.0622	2.5717	3.0957	3.5269	4.1181	4.6675	4.9917	5.5095	6.0927	6.4321	7.1593	7.5857	7.9259	8.5959	8.9516	9.7219	10.214	10.598	10.865	11.527	12.08	12.441	12.899	12.97	13.46	13.849	14.868	15.165
0.49979	1.0008	1.5007	2.0786	2.5592	3.0053	3.5117	4.1685	4.6947	4.9634	5.4592	6.0284	6.5441	7.2553	7.4868	7.99	8.6229	9.0351	9.547	10.199	10.459	10.881	11.593	12.182	12.459	12.952	12.952	13.496	13.756	14.497	14.809
0.48353	1.0008	1.5414	2.035	2.6094	3.0053	3.4966	4.2878	4.6494	4.954	5.5702	6.0391	6.5104	7.1832	7.4622	8.0286	8.5824	8.9239	9.576	10.199	10.336	10.865	11.461	12.234	12.441	12.845	13.006	13.533	13.868	14.691	15.265
0.48353	1.0008	1.5505	2.0567	2.6411	2.9847	3.4139	4.2109	4.6313	4.9917	5.5803	5.9751	6.5441	7.1712	7.4132	8.0157	8.5018	9.0072	9.6488	10.154	10.413	10.881	11.544	12.2	12.528	12.863	13.006	13.589	13.774	14.477	15.085
0.49364	1.0043	1.4695	2.0513	2.6347	3.033	3.5041	4.0846	4.6223	4.9917	5.6313	5.9751	6.578	7.1593	7.4868	8.0157	8.475	9.0072	9.8102	10.229	10.428	11.056	11.511	11.961	12.476	12.739	13.024	13.719	13.812	14.516	15.085
0.49773	0.97004	1.5277	2.0731	2.6221	3.0399	3.4814	4.093	4.6133	4.8883	5.5905	5.9964	6.6233	7.2072	7.4132	8.0544	8.435	9.0211	9.6051	10.078	10.443	10.992	11.643	12.217	12.476	12.828	12.988	13.719	13.981	14.477	15.406
0.48554	1.0253	1.6202	2.0786	2.6031	3.0538	3.4438	4.1181	4.6313	4.8977	5.4994	6.0071	6.5216	7.2433	7.5238	8.0803	8.4616	8.9794	9.6196	10.474	10.474	11.088	11.61	12.046	12.441	13.024	13.132	13.589	13.868	14.555	14.927
0.48554	0.99394	1.5368	2.0622	2.6031	3.0399	3.5574	4.1349	4.6313	4.9352	5.4692	5.9858	6.5893	7.1832	7.5238	8.0028	8.4616	8.9655	9.8102	10.199	10.428	11.104	11.626	12.012	12.337	12.917	13.132	13.552	13.962	14.516	15.046
0.48957	1.0008	1.5097	2.0731	2.6031	3.0747	3.4139	4.0763	4.6584	5.0582	5.5398	6.0071	6.646	7.1712	7.5361	8.0803	8.5152	8.9655	9.5905	10.336	10.443	11.136	11.56	12.131	12.424	12.774	13.006	13.607	13.849	14.477	15.306
0.49773	0.96328	1.5828	2.0567	2.6094	3.0677	3.6421	4.1349	4.6494	4.8047	5.4793	5.9539	6.5667	7.2915	7.3522	7.9259	8.5152	8.9516	9.7366	10.382	10.49	10.944	11.593	12.029	12.493	12.774	13.186	13.478	13.849	14.672	14.986
0.50393	1.0358	1.5414	2.0677	2.5905	3.0817	3.5804	4.1601	4.5863	4.9917	5.5195	5.9964	6.7146	7.1712	7.4622	8.0415	8.435	8.8824	9.6342	10.138	10.459	11.152	11.494	12.012	12.511	12.81	12.952	13.663	13.737	14.555	15.225
0.49773	0.99739	1.4917	2.0567	2.6094	3.0607	3.5574	4.0183	4.6313	4.8883	5.4692	6.0498	6.7146	7.1473	7.4254	8.0157	8.3685	8.9101	9.6051	9.9883	10.459	11.152	11.461	12.063	12.424	12.616	13.241	13.589	13.831	14.555	15.185
0.48957	1.0008	1.5142	2.0513	2.6221	3.0887	3.5041	4.0431	4.6856	4.9634	5.5095	5.9858	6.726	7.1712	7.4868	8.0803	8.3024	8.9239	9.6196	10.49	10.428	11.056	11.544	11.927	12.337	12.739	13.259	13.607	13.831	14.613	15.006
0.49979	0.95656	1.5414	2.0731	2.5968	3.0887	3.5041	4.1265	4.7863	5.0297	5.5195	5.9222	6.7146	7.1593	7.4991	8.0286	8.3818	8.9377	9.576	10.154	10.351	10.976	11.428	11.944	12.616	12.686	13.114	13.552	13.831	14.633	15.528
0.49364	0.99739	1.5232	2.1228	2.6538	3.0957	3.5041	4.1097	4.6313	4.9823	5.5803	5.9645	6.6688	7.1593	7.4868	8.1322	8.3818	8.9655	9.5905	10.169	10.275	10.976	11.626	12.285	12.563	12.704	13.114	13.644	14.056	14.555	15.185
0.48957	0.98365	1.5323	2.1006	2.5717	3.0957	3.5193	4.1181	4.5953	5.0297	5.5195	5.9433	6.6688	7.1354	7.4499	8.0673	8.3552	9.0211	9.6051	10.214	10.336	10.944	11.659	12.012	12.563	12.739	13.024	13.423	13.737	14.613	14.75
0.48353	1.0008	1.5874	2.0458	2.5905	3.1521	3.5498	4.1097	4.6133	5.0869	5.4692	6.125	6.6574	7.1473	7.4376	8.1192	8.3552	9.0072	9.4172	10.275	10.567	10.992	11.577	11.995	12.616	12.757	13.042	13.626	13.849	14.633	15.145
0.50601	0.99739	1.5187	2.0731	2.5592	3.1521	3.5421	4.0183	4.6313	5.0678	5.3794	5.8696	6.6688	7.1473	7.4499	8.1322	8.4483	9.0351	9.6488	10.138	10.583	11.088	11.743	12.08	12.32	12.774	12.935	13.533	13.849	14.477	15.066
0.49773	1.0008	1.5368	2.0951	2.553	3.0957	3.5117	4.1265	4.7038	5.0202	5.5297	5.9964	6.7031	7.1832	7.4009	8.0286	8.395	9.0211	9.5181	10.018	10.692	10.944	11.726	12.131	12.563	12.81	13.024	13.423	13.943	14.535	15.245
0.49979	1.0078	1.5323	2.0296	2.5281	3.0957	3.5345	4.1181	4.6947	5.0773	5.4793	5.9858	6.772	7.2192	7.4991	8.1062	8.4216	9.091	9.5036	10.229	10.459	11.12	11.659	11.995	12.459	12.863	12.935	13.478	13.924	14.285	15.306
0.5081	0.95991	1.5459	2.0841	2.5467	3.0957	3.5269	4.0101	4.7221	5.0392	5.4592	5.9751	6.646	7.2192	7.5114	8.1452	8.4616	8.9794	9.5615	10.244	10.474	11.008	11.676	11.927	12.389	12.721	13.042	13.423	13.831	14.477	15.105
0.47755	0.99739	1.5414	2.0786	2.5343	3.0957	3.5421	4.0763	4.6313	5.0202	5.4793	5.9645	6.5329	7.2192	7.2795	8.0932	8.4616	9.077	9.5905	10.428	10.428	11.024	11.577	12.165	12.355	12.669	13.132	13.681	14.094	14.574	15.225
0.50393	1.0043	1.5643	2.0404	2.5968	3.0957	3.5881	4.0597	4.6403	4.9728	5.5195	5.9433	6.646	7.1832	7.623	7.9387	8.4483	9.0211	9.6196	10.428	10.583	11.04	11.61	12.131	12.389	12.863	13.006	13.533	14	14.672	15.225
0.49773	1.0043	1.5368	2.0134	2.6221	3.1097	3.5041	4.1265	4.6223	4.9917	5.5195	6.0071	6.612	7.1593	7.4376	8.0932	8.5018	9.105	9.6051	10.443	10.397	11.008	11.659	12.251	12.424	12.721	13.06	13.589	13.887	14.672	15.165
0.48755	1.0288	1.6014	2.035	2.6987	3.0817	3.5269	4.1517	4.5863	5.0012	5.5195	5.9222	6.646	7.1593	7.4499	8.1843	8.5555	9.1895	9.6634	10.382	10.29	11.088	11.544	12.285	12.546	12.757	12.952	13.168	14.094	14.652	15.245
0.49979	0.9905	1.5551	2.0622	2.6221	3.0677	3.5041	3.9526	4.5774	4.9258	5.5095	5.9858	6.612	7.0878	7.3765	8.1062	8.5824	9.1895	9.7073	10.336	10.474	10.707	11.478	12.131	12.459	12.935	12.97	13.386	14	14.555	15.265
0.47954	0.9905	1.5323	2.0622	2.5592	3.1097	3.5574	4.0266	4.5595	4.9164	5.56	6.1466	6.5893	7.1116	7.4499	8.0544	8.5824	9.1472	9.7073	10.169	10.505	11.088	11.461	12.114	12.424	12.863	12.917	13.423	13.868	15.165	15.285
0.47954	1.0008	1.5142	2.0731	2.5343	3.0887	3.5498	4.0597	4.5149	4.9352	5.56	5.9328	6.646	7.2072	7.5114	8.0932	8.4884	9.105	9.7073	10.138	10.413	10.944	11.593	11.978	12.511	12.863	12.97	13.478	13.906	14.381	15.205
0.49979	0.9905	1.5097	2.1228	2.5968	3.033	3.5574	4.0431	4.5327	4.9634	5.6007	6.0177	6.646	7.1832	7.5238	8.0028	8.5555	9.1895	9.7807	10.169	10.474	11.024	11.61	12.029	12.493	12.828	12.917	13.533	13.943	14.535	15.046
0.49773	0.98365	1.5277	2.0896	2.6157	3.0053	3.5269	4.1265	4.5416	4.9352	5.5095	6.0391	6.6233	7.0168	7.2915	8.0673	8.4884	9.1191	9.6196	10.154	10.321	10.96	11.544	12.268	12.598	12.899	13.186	13.589	13.868	14.477	15.066
0.50393	0.98707	1.5597	2.0677	2.6094	3.0399	3.5041	4.1013	4.5238	4.9445	5.5195	5.9858	6.6688	7.2192	7.3279	7.9771	8.4884	9.1754	9.6634	10.108	10.397	11.024	11.445	11.978	12.739	12.81	13.204	13.496	13.943	14.691	15.006
0.48353	0.99394	1.5232	2.0677	2.6031	3.0677	3.5041	4.177	4.5327	4.954	5.4592	6.0498	6.646	7.2072	7.34	8.0415	8.4616	9.1754	9.6342	10.138	10.305	11.249	11.593	12.217	12.563	12.686	13.132	13.681	13.943	14.516	15.046
0.49364	0.99394	1.5368	2.0786	2.6157	3.0747	3.5727	4.2364	4.5595	4.9352	5.5095	6.0498	6.6574	7.4009	7.3522	7.9259	8.395	9.1895	9.5615	10.199	10.244	11.024	11.445	12.165	12.441	12.828	13.168	13.46	13.793	14.652	15.026
0.48957	1.0078	1.5368	2.0622	2.6094	3.0468	3.4966	4.0101	4.5774	5.0202	5.5702	6.125	6.6688	7.2192	7.4499	7.99	8.475	9.1613	9.576	10.108	10.351	11.152	11.527	11.978	12.493	12.863	13.15	13.313	14.037	14.4	15.066
0.48554	1.0182	1.5187	2.0404	2.5905	3.0607	3.5269	4.177	4.5684	4.8511	5.6007	6.0284	6.726	7.2915	7.3644	7.9771	8.5018	9.2177	9.678	10.093	10.123	11.104	11.577	12.182	12.511	12.899	13.168	13.441	13.868	14.439	15.085
0.48755	1.0288	1.4917	2.008	2.5905	3.0191	3.5041	4.1265	4.5863	4.9823	5.56	5.9858	6.7951	7.3279	7.4009	7.9387	8.4483	9.049	9.576	9.9585	10.397	10.912	11.478	12.08	12.337	12.917	13.114	13.552	13.756	14.594	15.265
0.49568	1.0043	1.4695	2.0841	2.578	3.0538	3.5574	3.9445	4.6494	4.907	5.5803	5.9751	6.5893	7.3037	7.4376	8.0286	8.5689	9.063	9.6051	10.244	10.459	10.992	11.61	12.165	12.32	12.721	13.186	13.496	13.793	14.497	15.085
0.49979	1.0113	1.5323	2.035	2.6221	3.0538	3.5421	4.1181	4.5863	4.9634	5.56	6.0284	6.5216	7.1116	7.5361	8.0157	8.5555	9.049	9.6488	10.321	10.536	10.976	11.577	12.131	12.303	12.774	13.096	13.589	13.793	14.711	15.105
0.49364	1.0288	1.5277	2.0404	2.6157	3.033	3.5269	4.0846	4.6223	4.907	5.5297	5.9858	6.646	7.34	7.4868	7.9515	8.6635	8.9933	9.6051	10.154	10.474	11.056	11.56	12.012	12.424	12.669	13.132	13.496	13.7	14.535	15.066
0.49568	1.0253	1.5007	2.0731	2.6094	2.971	3.5193	4.1433	4.6223	4.9634	5.5499	6.0927	6.5329	7.1354	7.5238	8.1062	8.5689	9.049	9.6051	10.305	10.598	10.944	11.593	11.911	12.355	12.651	13.114	13.626	13.756	14.594	14.868
0.4916	0.99739	1.5459	2.0134	2.5842	3.0817	3.5041	4.1349	4.5595	5.0582	5.4994	6.0605	6.5216	7.1593	7.5733	8.0286	8.6364	8.9794	9.6342	10.382	10.443	10.976	11.593	12.148	12.459	12.863	13.096	13.478	13.831	14.672	15.145
0.49773	0.98024	1.5505	2.035	2.5654	2.9916	3.5117	4.0431	4.5416	4.9917	5.5297	5.9858	6.6347	7.1712	7.6105	8.0803	8.6771	8.9377	9.5905	10.336	10.397	10.96	11.56	12.046	12.406	12.774	13.042	13.478	13.626	14.574	15.085
0.50393	0.96666	1.5459	2.0677	2.6157	3.033	3.5269	4.2364	4.6403	4.9917	5.5499	5.9964	6.7146	7.2433	7.6604	8.0415	8.6635	8.9933	9.5905	10.443	10.881	11.152	11.56	12.114	12.251	12.633	13.114	13.441	13.7	14.535	15.145
0.51865	0.99739	1.5277	2.0841	2.6031	3.0677	3.5041	4.0597	4.5684	5.0202	5.5095	5.9964	6.5667	7.2072	7.5485	8.0932	8.6364	9.0072	9.5181	10.336	10.583	11.217	11.593	12.148	12.355	12.669	13.15	13.515	13.868	14.516	15.125
0.50601	1.0113	1.4475	2.0731	2.6221	3.026	3.5421	4.0266	4.713	5.0869	5.5095	6.0177	6.646	7.2915	7.6355	8.0803	8.6771	8.9933	9.576	10.351	10.26	11.104	11.577	12.012	12.355	12.581	12.952	13.478	14.019	14.594	15.046
0.48353	0.99394	1.5689	2.0786	2.5905	3.033	3.5041	4.177	4.6043	5.1061	5.6313	6.0498	6.646	7.2072	7.5114	7.9771	8.6771	9.0351	9.5325	10.336	10.382	11.04	11.577	12.114	12.32	12.686	12.988	13.295	13.812	14.535	15.225
0.4916	1.0008	1.5597	2.0622	2.5592	3.0191	3.4513	4.0763	4.6494	5.0965	5.5398	5.9964	6.578	7.1473	7.5114	8.0673	8.7316	9.063	9.5325	10.351	10.336	11.088	11.709	11.995	12.633	12.774	12.988	13.812	14.056	14.4	15.145
0.49773	0.95656	1.5505	2.0567	2.6284	3.0817	3.4739	4.1265	4.6584	5.0487	5.4994	5.9328	6.6688	7.1593	7.4868	8.0803	8.7316	8.9377	9.5325	10.305	10.367	11.168	11.659	12.063	12.651	12.792	12.757	13.589	13.831	14.266	15.285
0.4916	0.9905	1.4962	2.0896	2.5968	3.0191	3.4739	4.1517	4.6494	5.0678	5.56	5.9858	6.6802	7.0759	7.4991	8.0157	8.7452	9.0211	9.6634	10.214	10.367	10.992	11.61	12.063	12.651	12.81	12.917	13.332	13.887	14.458	15.125
0.48353	0.98024	1.4962	2.0841	2.6411	3.0817	3.4513	4.1265	4.6223	5.0678	5.4994	5.9539	6.6006	7.1116	7.5361	8.0286	8.7316	9.4029	9.576	10.169	10.428	11.12	11.826	12.029	12.633	12.739	12.935	13.441	13.774	14.652	14.986
0.48755	0.99394	1.5368	2.0896	2.6157	2.9573	3.565	4.1013	4.6856	5.0487	5.5398	5.8068	6.6917	7.0878	7.5857	7.99	8.7043	9.0211	9.576	10.063	10.645	11.511	11.726	12.029	12.563	12.493	13.222	13.313	13.831	14.769	15.205
0.4916	0.98707	1.5052	2.0786	2.6221	3.0399	3.5269	4.1939	4.6765	5.0392	5.6007	5.9328	6.5554	7.2795	7.4868	8.0028	8.6229	8.9239	9.6051	10.018	10.521	11.152	11.659	12.063	12.493	12.828	13.259	13.46	13.924	14.73	15.185
0.49568	0.99394	1.5277	2.1006	2.5842	2.9847	3.5574	4.1181	4.6494	5.0869	5.5702	6.0605	6.6233	7.2795	7.4622	7.9003	8.7043	9.1191	9.547	10.108	10.474	11.363	11.659	12.063	12.581	12.828	13.204	13.423	13.924	14.711	15.165
0.47755	0.96666	1.5232	2.1173	2.6157	3.0887	3.5574	4.1181	4.6584	4.9634	5.6109	5.9539	6.5216	7.3279	7.4254	8.0415	8.6229	8.9377	9.5615	10.138	10.567	11.008	11.693	12.285	12.528	12.81	13.204	13.35	13.924	14.672	14.986
0.48554	0.97004	1.5187	2.1173	2.6157	2.8964	3.5421	4.2279	4.6675	4.9728	5.6007	6.0177	6.5329	7.2795	7.4254	8.1452	8.65	9.2319	9.5905	10.123	10.521	11.088	11.626	12.148	12.581	12.633	13.132	13.405	13.924	14.613	15.125
0.46195	0.99394	1.5505	2.0786	2.5592	3.0468	3.5804	3.9282	4.6856	5.0107	5.56	5.9858	6.5216	7.0997	7.3279	8.0286	8.4884	8.9377	9.547	10.199	10.521	11.136	11.577	12.303	12.441	12.899	13.078	13.386	13.887	14.652	15.145
0.47755	0.9532	1.4873	2.0786	2.5592	3.0747	3.5804	4.1013	4.6223	5.0202	5.5803	5.9328	6.5554	7.1473	7.1952	8.0286	8.4884	9.1191	9.4892	10.169	10.629	11.104	11.56	12.131	12.459	12.845	13.15	13.313	13.737	14.652	15.185
0.49364	0.98365	1.5097	2.1006	2.6347	3.1521	3.5498	4.2535	4.6313	4.9917	5.6109	5.8696	6.5667	7.0878	7.2433	8.0932	8.475	8.9794	9.446	10.229	10.614	11.008	11.593	12.131	12.285	12.686	13.078	13.515	13.887	14.691	15.125
0.47954	1.0043	1.5689	2.1006	2.5842	2.971	3.5421	4.1181	4.6223	4.9917	5.662	5.88	6.5893	7.0759	7.2795	7.9131	8.4083	8.9794	9.576	10.214	10.521	11.056	11.676	12.217	12.234	12.669	13.006	13.386	13.981	14.574	15.066
0.48153	1.0078	1.5187	2.0786	2.5158	3.0399	3.565	3.9282	4.6313	5.0202	5.5297	6.0927	6.5893	7.0759	7.3279	7.9259	8.5555	9.0211	9.6051	10.29	10.676	10.976	11.659	12.148	12.355	12.845	13.313	13.332	13.906	14.691	15.245
0.48554	0.98365	1.5142	2.0786	2.6284	3.0887	3.5269	4.0018	4.6313	5.0582	5.5195	5.9328	6.6802	7.0404	7.3158	7.8367	8.4884	8.9377	9.6051	10.275	10.552	10.992	11.726	12.097	12.372	12.616	12.952	13.533	13.906	14.652	15.026
0.49568	1.0323	1.5097	2.0896	2.5592	3.033	3.5041	4.1265	4.6403	5.0297	5.6211	5.9751	6.6233	7.0523	7.4009	7.8748	8.5018	8.8824	9.678	10.169	10.49	10.992	11.693	12.114	12.372	12.686	13.132	13.277	13.943	14.691	15.346
0.49979	1.0008	1.4784	2.0622	2.6031	2.9916	3.4814	4.177	4.7312	4.9917	5.4392	5.9751	6.6347	7.1712	7.3644	8.0028	8.5689	9.1191	9.6196	10.244	10.49	10.96	11.233	12.063	12.303	12.828	13.006	13.405	13.756	14.594	15.225
0.49364	0.99739	1.4873	2.0188	2.578	3.0191	3.4589	4.2964	4.7679	5.0773	5.6211	5.9328	6.6347	7.0759	7.4254	7.9131	8.5018	9.0211	9.576	10.138	10.536	10.976	11.56	12.012	12.389	12.598	12.988	13.423	13.756	14.652	15.145
0.48353	1.0182	1.4917	2.0951	2.6094	3.0191	3.5269	3.9282	4.7038	5.0107	5.4994	5.9964	6.612	7.0523	7.3158	7.9003	8.7179	9.077	9.5905	10.214	10.443	11.072	11.61	12.012	12.337	12.863	13.35	13.35	14.17	14.419	15.386
0.49568	1.0182	1.5097	2.1173	2.7702	3.033	3.5041	4.1685	4.5953	5.0297	5.5297	5.9645	6.6006	7.0759	7.4009	8.1062	8.5959	8.9377	9.6488	10.108	10.49	11.072	11.494	12.046	12.441	12.616	13.295	13.441	13.906	14.381	15.105
0.52079	1.0113	1.5097	2.0841	2.5467	3.0468	3.4589	4.1097	4.5953	5.0392	5.5195	5.9011	6.4992	6.9698	7.4745	7.9771	8.5018	8.8549	9.5905	10.169	10.459	11.088	11.511	11.86	12.459	12.616	13.078	13.552	13.812	14.574	14.887
0.5123	1.0078	1.5277	2.0513	2.6284	2.971	3.4966	4.068	4.6403	4.9823	5.56	5.9222	6.6917	7.0404	7.4991	7.9003	8.6364	8.9655	9.547	10.214	10.49	11.088	11.396	11.826	12.493	12.669	13.042	13.663	13.774	14.594	14.947
0.5102	1.0217	1.5232	2.0841	2.6157	3.0538	3.5041	4.0183	4.5953	5.0012	5.4192	5.9433	6.726	7.0997	7.4376	7.9771	8.5824	8.8824	9.576	10.214	10.552	11.136	11.659	11.86	12.424	12.792	12.97	13.7	13.887	14.652	15.026
0.50601	1.0182	1.5097	2.0896	2.6157	3.0538	3.489	4.093	4.6403	5.0012	5.5905	6.0071	6.726	7.1473	7.5485	8.0286	8.6635	9.077	9.547	10.123	10.598	11.072	11.445	11.793	12.511	12.704	12.97	13.46	13.924	14.419	15.085
0.48957	1.0323	1.5232	2.1062	2.6094	3.0607	3.4966	4.1855	4.6403	4.9823	5.6007	5.9539	6.7146	7.0878	7.5981	8.0157	8.542	9.0072	9.5181	10.229	10.397	11.056	11.461	11.894	12.476	12.616	13.06	13.533	13.831	14.75	15.046
0.50393	0.98024	1.5597	2.1062	2.5842	3.0399	3.4739	4.1265	4.5505	4.9728	5.6211	6.0498	6.646	7.1952	7.4991	8.1582	8.6229	9.063	9.5325	10.229	10.336	11.04	11.347	11.944	12.511	12.917	13.241	13.46	13.924	14.691	14.907
0.50186	0.97683	1.5828	2.0951	2.5654	3.0607	3.5345	4.1685	4.5863	5.0297	5.6211	6.0177	6.6233	7.2433	7.4499	8.1452	8.6229	9.0211	9.4316	10.244	10.244	10.96	11.494	11.793	12.441	12.935	13.114	13.515	14	14.73	14.947
0.49979	0.99394	1.5828	2.0513	2.5281	3.0607	3.5804	4.2364	4.5774	4.8883	5.5702	6.0927	6.6574	7.1832	7.5485	8.1192	8.5824	9.1895	9.5181	10.169	10.229	11.008	11.445	11.843	12.739	12.828	13.168	13.46	14.037	14.613	15.066
0.50393	1.0043	1.5874	2.0622	2.5281	3.0747	3.6112	4.1097	4.5953	4.9728	5.5195	6.082	6.6802	7.2433	7.5485	7.99	8.6635	9.063	9.5615	10.184	10.521	10.976	11.544	11.877	12.563	12.774	13.386	13.496	13.943	14.613	15.066
0.50393	0.98707	1.5459	2.0188	2.4911	3.033	3.5269	4.0597	4.6223	5.0869	5.5195	6.1358	6.6574	7.1952	7.5733	8.0932	8.4884	9.091	9.576	10.169	10.49	11.088	11.544	11.843	12.424	12.633	13.168	13.589	14	14.711	15.145
0.50186	0.95656	1.5414	2.0188	2.5405	3.0607	3.5957	4.1349	4.6043	4.9823	5.56	6.0284	6.612	7.2553	7.4991	8.0932	8.4083	9.105	9.5905	10.244	10.567	10.928	11.643	11.877	12.406	12.828	12.97	13.57	14	14.848	15.046
0.52293	0.99739	1.5874	2.0731	2.5219	3.0538	3.6499	4.0183	4.5327	4.9258	5.4093	6.0927	6.5441	7.2192	7.4991	8.0932	8.5286	9.091	9.6196	10.199	10.521	10.897	11.412	11.927	12.651	12.704	13.042	13.7	14.075	14.809	15.185
0.49568	0.99394	1.5323	2.0841	2.6284	3.0468	3.6112	4.177	4.4972	4.9823	5.4994	6.0071	6.5441	7.2915	7.4868	8.1843	8.5555	9.3314	9.7366	10.275	10.598	10.96	11.544	12.012	12.616	12.704	12.97	13.552	14.189	14.848	15.245
0.48554	0.98707	1.5232	2.0404	2.6094	3.0677	3.5345	3.9772	4.4972	4.8604	5.5095	6.0284	6.726	7.2433	7.5733	8.0932	8.5824	8.9516	9.678	10.244	10.723	10.928	11.428	12.114	12.528	12.669	12.97	13.626	14	14.691	15.326
0.4916	0.9905	1.5505	2.0242	2.5592	2.9642	3.5041	4.1685	4.5953	5.2221	5.6723	5.9858	6.5554	7.2795	7.4009	8.1452	8.5018	9.1472	9.766	10.169	10.614	10.897	11.494	11.944	12.633	12.651	12.581	13.681	13.981	14.652	15.326
0.47954	0.98024	1.5232	2.0458	2.578	3.0887	3.5421	4.1097	4.6043	4.954	5.5297	6.0071	6.5104	7.3037	7.4991	8.1322	8.542	9.091	9.576	10.048	10.645	10.817	11.511	11.995	12.424	12.633	13.132	13.7	13.887	14.652	15.225
0.49364	0.99394	1.5414	2.0404	2.6411	3.033	3.489	4.2024	4.6043	5.0107	5.5095	5.9858	6.5329	7.2674	7.3887	8.1192	8.4216	9.1895	9.6634	10.108	10.645	10.786	11.412	12.012	12.563	12.633	13.096	13.681	13.831	14.613	15.165
0.47954	0.98365	1.5277	2.035	2.6347	2.9505	3.5804	3.9608	4.5684	5.1349	5.4893	5.9011	6.5667	7.34	7.4991	8.0803	8.5286	9.0211	9.8397	10.214	10.645	10.865	11.478	12.08	12.493	12.739	13.06	13.607	13.831	14.497	15.306
0.49773	0.98365	1.5187	2.0188	2.6347	3.1097	3.565	4.2194	4.5061	4.9823	5.5095	5.9328	6.578	7.3158	7.5238	8.1192	8.5286	9.049	9.5325	10.199	10.614	10.849	11.511	12.063	12.598	12.704	13.114	13.515	13.737	14.574	15.185
0.4916	0.97683	1.5277	1.9866	2.6475	3.033	3.5574	4.0514	4.5149	5.0202	5.4994	5.9539	6.7031	7.2674	7.5361	8.0415	8.4483	9.091	9.4892	10.443	10.629	10.897	11.511	12.046	12.686	12.81	13.15	13.405	13.868	14.633	15.205
0.48957	0.98024	1.5007	2.0622	2.6538	3.0887	3.5498	4.2194	4.5149	5.2027	5.5803	6.0071	6.6233	7.2795	7.3644	8.0803	8.542	9.091	9.2177	10.351	10.817	10.928	11.544	12.046	12.739	12.792	13.06	13.405	13.887	14.574	15.165
0.48153	0.99739	1.4962	2.0404	2.578	3.145	3.5117	4.2279	4.5505	5.0107	5.4392	6.125	6.7146	7.1832	7.34	7.9387	8.475	9.1331	9.4029	10.108	10.567	10.992	11.61	12.012	12.633	12.651	13.295	13.277	13.831	14.555	15.205
0.49979	1.0008	1.5097	2.0896	2.5968	3.0607	3.4664	4.0763	4.5149	5.0202	5.4893	6.1466	6.6006	7.2192	7.4622	8.0803	8.5018	9.091	9.5325	10.169	10.49	11.152	11.511	11.961	12.598	12.935	13.132	13.277	13.868	14.555	15.165
0.50393	0.96328	1.5007	2.0567	2.6094	3.0957	3.4513	4.068	4.5327	5.0297	5.3201	6.0284	6.5667	7.1712	7.3158	7.9515	8.4216	8.8549	9.3599	10.123	10.474	11.088	11.643	11.927	12.633	12.81	13.078	13.241	13.756	14.633	15.105
0.48353	0.9905	1.4739	2.0731	2.6538	3.0607	3.5574	4.0597	4.5774	5.0773	5.4592	6.0391	6.646	7.1116	7.4991	8.0544	8.4884	9.1895	9.5615	10.108	10.552	11.04	11.61	11.911	12.459	12.81	13.024	13.496	13.793	14.711	15.105
0.49773	0.9532	1.4651	2.1117	2.5968	3.0957	3.5345	4.1855	4.5953	5.0202	5.5095	6.1683	6.5441	7.1593	7.4132	8.1452	8.4616	9.0351	9.6196	10.229	10.598	11.008	11.626	11.961	12.546	12.774	13.186	13.496	13.719	14.381	15.026
0.47165	0.98365	1.4962	2.0458	2.6157	3.0747	3.5117	4.1939	4.5061	5.0487	5.5803	6.1358	6.578	7.2553	7.4868	8.0415	8.3685	8.9933	9.5325	10.123	10.583	11.024	11.593	11.911	12.441	12.774	13.168	13.441	13.793	14.535	14.887
0.48554	0.96328	1.4917	2.0841	2.6031	3.0747	3.5117	4.3136	4.3396	5.0202	5.5297	6.0177	6.5554	7.2674	7.6105	8.1712	8.4616	9.0211	9.6634	10.305	10.598	11.088	11.461	11.877	12.389	12.792	12.881	13.46	13.849	14.113	15.026
0.48554	0.9532	1.5459	2.0622	2.5842	3.0468	3.5881	3.9363	4.5863	4.8883	5.4793	6.0712	6.612	7.1593	7.4868	8.1192	8.4083	9.0351	9.6634	10.26	10.583	11.008	11.478	11.81	12.424	12.881	13.204	13.533	13.589	14.477	14.966
0.51865	0.99739	1.4962	2.0896	2.6031	3.033	3.4739	4.2535	4.6403	4.9917	5.56	6.1575	6.5893	7.1712	7.7987	8.1322	8.4616	9.0351	9.678	10.275	10.676	11.168	11.461	12.063	12.598	13.132	13.078	13.533	13.737	14.73	14.927
0.48353	0.96666	1.5323	2.0731	2.6221	3.0122	3.489	4.1097	4.6675	4.9728	5.6313	6.0605	6.5329	7.2072	7.6729	8.1192	8.395	8.9794	9.7807	10.275	10.645	11.249	11.544	12.029	12.616	13.096	13.024	13.515	13.774	14.769	15.026
0.48153	0.96328	1.5187	2.035	2.5842	2.9779	3.5117	4.1433	4.5863	4.9917	5.3596	6.1035	6.6688	7.2192	7.5733	8.2366	8.4884	9.063	9.766	10.184	10.629	11.024	11.478	11.961	12.528	13.024	13.06	13.607	13.812	14.711	15.125
0.47361	0.9905	1.5142	2.0731	2.5842	2.9505	3.5421	4.068	4.5863	5.0012	5.56	6.1358	6.6574	7.1712	7.4132	8.0028	8.5824	8.9516	9.6488	10.229	10.536	11.12	11.511	11.643	12.337	12.935	13.06	13.533	13.849	14.555	15.145
0.5102	1.0078	1.4962	2.0567	2.5281	2.9573	3.5727	4.2706	4.4443	4.9823	5.56	6.0712	6.6347	7.1354	7.4622	8.2498	8.4616	9.0072	9.7807	10.033	10.598	11.136	11.544	11.826	12.476	12.774	13.114	13.478	13.924	14.574	15.145
0.49979	0.97683	1.5323	2.1173	2.5905	3.026	3.5574	4.0514	4.4972	4.8697	5.4392	6.1575	6.6917	7.1473	7.3887	8.2366	8.3685	9.1613	9.7219	10.154	10.598	11.056	11.577	11.877	12.581	12.792	13.096	13.313	13.849	14.887	15.085
0.49364	0.92339	1.4962	2.1173	2.5717	3.0399	3.5498	4.1433	4.6133	5.0487	5.5398	6.1142	6.5554	7.1593	7.5238	8.0544	8.5018	9.0072	9.678	10.229	10.598	11.008	11.577	12.2	12.459	12.917	13.114	13.441	13.924	14.711	15.026
0.47361	1.0078	1.5551	2.0458	2.5654	3.0677	3.5117	4.068	4.5505	4.9634	5.5398	6.0498	6.6574	7.1235	7.4499	8.2104	8.4083	9.0211	9.6488	10.184	10.093	11.008	11.56	12.251	12.493	12.917	13.06	13.405	13.906	14.613	15.066
0.49773	0.99394	1.4962	2.0731	2.553	3.0747	3.5041	4.0846	4.6494	5.0012	5.5095	6.0071	6.6006	7.1593	7.4376	7.7861	8.2892	9.077	9.6051	10.123	10.661	11.008	11.461	11.995	12.389	12.828	12.935	13.368	13.849	14.691	14.966
0.49364	0.98024	1.4962	2.1006	2.5905	3.0538	3.4814	4.1013	4.6403	5.0107	5.4592	6.0071	6.3323	7.0286	7.3158	7.99	8.475	9.1613	9.5036	10.26	10.645	11.024	11.544	12.114	12.389	12.952	13.15	13.423	13.644	14.419	15.085
0.49364	0.99739	1.5097	2.1228	2.553	3.0538	3.4513	3.969	4.5774	4.9728	5.4592	6.0498	6.7031	7.1712	7.4009	8.0932	8.475	9.105	9.4892	10.093	10.49	11.088	11.494	11.995	12.493	12.952	13.114	13.46	13.607	14.633	15.145
0.47755	0.98707	1.4828	2.0951	2.6031	3.0677	3.5269	4.1181	4.6584	4.9445	5.5195	6.0071	6.6006	7.3158	7.4254	7.9771	8.5824	9.1331	9.4748	10.29	10.367	11.024	11.659	12.097	12.528	13.024	13.096	13.46	13.831	14.672	15.006
0.49568	1.0008	1.5505	2.0731	2.578	3.0677	3.4739	4.068	4.6043	4.9823	5.4793	6.0284	6.5893	7.0759	7.3765	7.9003	8.5689	9.077	9.4748	10.244	10.459	11.088	11.577	12.182	12.406	12.97	13.204	13.57	13.626	14.887	15.265
0.49364	0.99394	1.5097	2.0513	2.6094	3.0468	3.4966	3.9201	4.6043	5.0107	5.5297	6.0071	6.5893	7.1473	7.3158	7.9003	8.5286	9.063	9.8102	10.214	10.598	11.12	11.659	12.114	12.476	12.97	13.024	13.515	13.589	14.594	15.225
0.47755	0.97343	1.5277	2.162	2.5905	3.0887	3.489	4.0101	4.6675	4.9634	5.5499	5.9964	6.6006	6.958	7.4009	7.9643	8.6229	9.091	9.4172	10.367	10.521	11.314	11.61	12.029	12.546	12.792	13.006	13.607	14.4	14.535	15.066
0.48353	0.94986	1.5232	2.0567	2.6221	3.1168	3.5498	4.1939	4.5863	5.2027	5.4692	6.082	6.5104	7.2674	7.4254	7.99	8.5689	9.077	9.4892	10.244	10.614	11.104	11.56	12.012	12.651	12.863	13.042	13.7	14.458	14.613	15.046
0.48957	1.0253	1.5142	2.0731	2.5343	3.0957	3.5498	4.1601	4.5774	4.9634	5.3993	6.0284	6.6347	7.0759	7.5238	8.0157	8.5018	9.105	9.4029	10.199	10.583	11.201	11.56	11.978	12.598	12.935	12.952	13.46	13.756	14.497	15.165
0.52079	0.95991	1.5187	2.0134	2.6157	3.1168	3.5117	4.2792	4.5238	4.954	5.5095	6.0498	6.646	7.2072	7.34	7.9259	8.5152	9.1331	9.576	10.29	10.552	11.088	11.478	12.131	12.511	12.881	13.078	13.46	13.906	14.458	15.245
0.49364	1.0078	1.5142	2.0567	2.6221	3.0957	3.4739	4.2279	4.6313	5.0392	5.4592	6.0177	6.6006	7.2433	7.4254	7.8494	8.4483	9.1895	9.7219	10.169	10.567	11.217	11.379	11.995	12.355	12.935	13.06	13.589	13.962	14.439	15.125
0.48755	0.97683	1.5097	2.0513	2.553	3.0887	3.565	4.1349	4.5416	4.9634	5.4893	6.082	6.6006	7.0759	7.4868	8.0803	8.4483	9.1754	9.3599	10.063	10.351	10.865	11.347	12.114	12.406	12.845	12.97	13.478	13.924	14.516	15.026
0.49979	0.97343	1.5187	2.0567	2.5968	3.0607	3.489	4.1349	4.5684	5.0202	5.5195	6.0605	6.5329	7.1712	7.4254	8.0415	8.3552	9.2036	9.766	10.003	10.459	11.008	11.544	12.063	12.774	12.863	12.881	13.57	13.887	14.633	15.046
0.49773	0.97343	1.5505	2.0951	2.6284	3.1168	3.5421	4.0266	4.5953	4.9917	5.5905	6.0927	6.4656	7.1235	7.4009	8.1712	8.4616	9.2319	9.6488	10.275	10.536	11.088	11.478	11.995	12.511	12.81	12.97	13.533	13.756	15.006	15.046
0.48755	0.95656	1.4917	2.0677	2.5905	3.1309	3.5498	4.1013	4.5238	5.0678	5.4793	6.0927	6.6006	7.2072	7.4991	8.0286	8.4483	9.1613	9.7073	10.108	10.336	10.992	11.494	12.063	12.459	12.881	13.06	13.719	14.132	14.672	15.006
0.46969	0.98707	1.5459	2.0841	2.6094	3.1168	3.4966	4.3396	4.5595	5.0297	5.4994	6.0284	6.5216	7.2553	7.5361	7.9003	8.5286	9.1191	9.5615	10.123	10.397	10.912	11.478	12.046	12.459	12.739	13.06	13.57	13.962	14.419	15.245
0.51441	0.97343	1.5323	2.0677	2.6157	3.0817	3.5421	4.1433	4.6223	4.8604	5.4994	6.1142	6.6917	7.2915	7.5485	8.1322	8.5286	9.1331	9.6342	10.018	10.567	11.185	11.478	12.2	12.528	12.899	13.313	13.423	13.887	14.458	15.245
0.50186	0.98707	1.5323	2.0951	2.6157	3.0677	3.5727	4.1433	4.5238	5.0773	5.4994	6.0071	6.5554	7.1354	7.4622	7.9387	8.5555	9.077	9.5615	10.184	10.505	11.008	11.445	12.097	12.459	12.792	13.15	13.222	13.906	14.497	15.006
0.49979	0.98707	1.5232	2.0786	2.5968	3.0607	3.489	4.1685	4.5863	5.0012	5.56	6.0071	6.5441	7.1832	7.4499	7.9387	8.542	9.0351	9.5325	10.229	10.505	11.168	11.56	12.097	12.546	12.863	13.15	13.35	13.868	14.73	15.285
0.5123	0.99739	1.5277	2.0513	2.5842	3.0957	3.5193	4.2364	4.5149	5.0678	5.5702	6.0391	6.5329	7.1832	7.5857	7.9259	8.6229	9.1331	9.4892	10.078	10.49	10.912	11.396	12.046	12.546	12.704	13.204	13.644	13.793	14.691	15.245
0.50601	0.98365	1.5097	2.1006	2.6094	3.033	3.5117	4.1517	4.5863	5.0487	5.5297	6.0498	6.5893	7.1473	7.5238	7.9643	8.6094	8.9516	9.5325	9.9883	10.413	10.881	11.412	12.097	12.704	12.81	13.168	13.204	13.924	14.907	15.165
0.49568	0.97004	1.5368	2.0567	2.5842	3.1027	3.5498	4.1013	4.5863	5.0773	5.5398	6.1358	6.5216	7.2312	7.5485	7.9771	8.6364	9.0351	9.547	9.9883	10.351	11.12	11.379	12.08	12.581	12.669	13.204	13.368	13.793	14.613	15.145
0.50601	1.0043	1.4962	2.0296	2.6411	3.0677	3.5193	4.2194	4.5774	5.0773	5.5499	6.0284	6.612	7.1593	7.5733	7.9515	8.6364	9.049	9.5615	10.169	10.536	10.96	11.478	12.182	12.459	12.899	13.204	13.515	13.756	14.574	15.346
0.50186	0.99739	1.5232	2.0567	2.4484	3.0817	3.5193	4.1855	4.5774	5.0487	5.4893	6.1035	6.578	7.1832	7.5361	8.276	8.6907	9.077	9.4748	10.093	10.443	11.217	11.379	12.114	12.493	12.863	13.132	13.368	14	14.691	14.927
0.50393	0.99394	1.5323	2.1173	2.5905	3.1027	3.5269	4.1601	4.6133	5.0297	5.4692	6.0712	6.5329	7.1593	7.4745	8.0028	8.7043	9.077	9.3742	10.275	10.474	11.072	11.428	12.148	12.459	13.241	13.132	13.386	13.981	14.208	15.046
0.50393	0.97683	1.5459	2.0404	2.6157	3.0399	3.5041	4.1601	4.6133	5.0012	5.5095	6.0391	6.646	7.0997	7.4745	7.9643	8.5824	9.063	9.3456	10.244	10.459	10.992	11.676	12.046	12.511	13.006	13.132	13.589	13.906	14.828	15.205
0.49364	1.0147	1.5323	2.0951	2.5842	3.0677	3.4664	4.1097	4.5953	5.0107	5.5195	6.0498	6.6233	7.1473	7.5733	7.9387	8.65	9.0211	9.6196	10.29	10.413	11.233	11.776	12.012	12.476	12.988	13.024	13.405	13.812	14.497	15.006
0.49568	1.0253	1.4873	2.0677	2.5968	3.0538	3.5345	4.2279	4.5863	5.0297	5.4893	6.0391	6.6347	7.1712	7.4254	7.9131	8.5959	9.0211	9.576	9.8841	10.443	11.298	11.61	12.251	12.459	12.757	13.132	13.386	13.906	14.381	15.185
0.4916	0.98024	1.5142	2.0841	2.578	3.0677	3.6112	4.068	4.6494	5.0392	5.4994	6.0498	6.646	7.1593	7.3522	7.9259	8.5689	9.1331	9.4748	10.275	10.474	11.217	11.709	12.148	12.251	12.97	13.114	13.35	13.644	14.633	14.75
0.49364	0.98024	1.5142	2.0513	2.5842	3.0399	3.3991	4.093	4.5863	5.0107	5.5702	6.0177	6.6233	7.1116	7.4991	7.8367	8.5286	9.1191	9.4316	10.229	10.505	11.201	11.643	12.182	12.598	12.669	13.096	13.533	13.644	14.613	15.225
0.47954	0.98024	1.5277	2.0513	2.6031	3.0191	3.5345	4.1349	4.6403	5.0297	5.6211	6.0284	6.5667	7.1354	7.4745	7.9643	8.5689	9.063	9.4316	10.26	10.567	11.088	11.676	12.165	12.528	13.024	13.06	13.423	13.533	14.594	14.887
0.49773	0.99394	1.5187	2.0404	2.6094	3.033	3.5269	4.1433	4.4795	4.9634	5.4994	6.0284	6.5554	7.1354	7.4132	8.0932	8.6364	9.049	9.4892	10.214	10.428	11.088	11.478	12.114	12.476	12.952	13.15	13.533	13.906	14.613	15.085
0.48153	0.98024	1.5597	2.0404	2.7376	3.026	3.5269	4.1855	4.4707	4.9917	5.5398	6.0712	6.5554	7.1712	7.4132	8.0157	8.5018	9.049	9.4748	10.093	10.536	11.12	11.759	12.063	12.598	12.935	13.186	13.515	13.962	14.711	15.346
0.48554	0.98365	1.5323	2.0458	2.6221	3.0399	3.4513	4.1265	4.5327	4.9634	5.5195	6.0927	6.5554	7.1832	7.4868	7.8748	8.542	9.077	9.576	10.26	10.459	11.008	11.709	12.097	12.669	12.881	13.114	13.441	13.924	14.362	15.085
0.49364	0.99394	1.5232	2.0567	2.5968	3.033	3.4438	4.1517	4.5416	4.9352	5.6211	6.0284	6.5216	7.1832	7.5361	7.9643	8.5018	9.1472	9.576	10.336	10.474	11.088	11.445	12.2	12.633	12.792	12.988	13.259	14	14.769	15.487
0.47558	1.0043	1.5689	2.035	2.578	3.033	3.4664	4.177	4.5595	4.9258	5.4692	5.9222	6.4767	7.1473	7.4499	7.8876	8.4616	9.091	9.6634	10.108	10.244	11.152	11.643	12.285	12.633	12.881	13.222	13.478	14.037	14.555	15.066
0.47954	0.9905	1.5142	2.0786	2.6031	3.033	3.5117	4.1855	4.5774	4.9634	5.5095	5.9751	6.4767	7.1116	7.4499	8.0028	8.4884	9.063	9.6926	10.229	10.397	11.056	11.593	12.148	12.476	12.881	13.295	13.277	13.793	14.477	15.185
0.49773	1.0078	1.5643	2.1117	2.5968	3.026	3.5498	4.1517	4.5416	4.9258	5.5195	6.0284	6.4656	7.0404	7.5857	7.9387	8.542	9.063	9.7366	10.123	10.443	11.12	11.61	12.148	12.441	12.81	13.078	13.441	13.962	14.633	14.633
0.49364	0.96328	1.5097	2.1006	2.6094	2.9642	3.5574	4.1601	4.5505	4.8977	5.56	6.0284	6.4767	7.1473	7.5114	7.8876	8.5286	9.2319	9.6634	10.033	10.567	10.976	11.56	12.217	12.511	12.774	13.078	13.515	13.868	14.594	15.245
0.49979	1.0288	1.5232	2.0404	2.6031	3.0957	3.6189	4.1349	4.5863	4.9352	5.4793	5.88	6.5554	7.1952	7.5485	7.8876	8.5152	9.091	9.678	10.018	10.802	11.072	11.626	11.961	12.406	12.581	13.024	13.57	13.943	14.809	14.828
0.51441	1.0253	1.5505	2.0134	2.5842	3.026	3.5498	4.1517	4.5774	4.8977	5.5803	6.0498	6.5554	7.0523	7.5609	7.9003	8.5018	9.1754	9.7513	10.018	10.505	11.088	11.56	11.927	12.406	12.633	13.06	13.552	13.887	14.574	14.868
0.49364	1.0043	1.5368	2.0731	2.6094	3.1027	3.681	4.1601	4.5774	4.9258	5.5095	5.9751	6.578	7.1116	7.5485	7.9131	8.6364	9.0351	9.6634	9.9585	10.598	11.12	11.643	12.063	12.372	12.704	12.952	13.515	14.056	14.633	14.809
0.49979	1.0043	1.5232	2.0951	2.6031	2.9573	3.5804	4.2109	4.5238	4.954	5.5297	6.0284	6.5104	7.1235	7.5609	7.9003	8.475	9.0351	9.7366	10.123	10.382	11.088	11.527	12.148	12.493	12.581	13.259	13.515	14	14.458	14.555
0.5081	1.0182	1.5459	2.0513	2.5717	2.9779	3.5041	4.1685	4.4355	5.0202	5.5499	5.9328	6.5667	7.005	7.5485	7.9387	8.3685	9.0072	9.6634	10.078	10.505	11.024	11.527	12.063	12.598	12.739	13.06	13.774	13.887	14.555	15.386
0.50186	1.0078	1.5323	2.0622	2.6157	3.0053	3.489	4.1601	4.4883	5.0202	5.5195	6.2227	6.5441	7.0404	7.5485	7.9771	8.4216	8.8963	9.7513	9.9585	10.367	11.072	11.643	12.131	12.633	12.774	13.222	13.515	13.737	14.574	15.105
0.49773	1.0043	1.5459	2.0841	2.6094	3.0677	3.4664	4.1181	4.4972	5.0487	5.4893	6.0177	6.5329	7.1593	7.623	7.8621	8.5689	8.8963	9.5325	10.199	10.321	11.12	11.461	12.131	12.633	12.511	12.97	13.719	13.943	14.574	15.386
0.50186	1.0008	1.5277	2.0841	2.5968	3.0957	3.5345	4.1013	4.5416	4.9728	5.5095	5.88	6.4879	7.0878	7.5733	7.9259	8.5959	8.9239	9.5325	10.26	10.583	11.088	11.445	12.165	12.528	12.739	13.114	13.114	13.793	14.672	15.125
0.50393	0.98707	1.5277	2.1006	2.5905	3.0399	3.4739	4.1349	4.5774	4.9917	5.5095	5.9433	6.4544	7.1116	7.5485	7.9131	8.542	9.0211	9.766	10.29	10.367	10.865	11.626	12.131	12.493	12.757	13.114	13.681	13.756	14.574	14.868
0.50186	0.98707	1.5142	2.0896	2.7767	3.0957	3.4664	4.1349	4.5774	5.0297	5.4994	6.082	6.4098	7.1832	7.5238	8.0415	8.5018	9.0211	9.7513	10.305	10.367	11.104	11.56	12.182	12.406	12.792	13.186	13.386	13.849	14.868	15.346
0.48957	1.0182	1.4873	2.0786	2.673	3.033	3.5193	4.1517	4.6043	4.954	5.4292	6.0071	6.5216	7.1712	7.4991	7.9387	8.5286	9.049	9.7073	10.397	10.428	11.152	11.478	12.08	12.372	12.828	13.168	13.295	13.849	14.868	15.225
0.49364	1.0147	1.5414	2.0677	2.6094	3.1027	3.5498	4.1097	4.5684	4.9917	5.4893	6.0284	6.6233	7.1832	7.4622	8.0415	8.5689	9.0072	9.5325	10.443	10.459	11.265	11.56	12.063	12.372	12.81	13.096	13.441	13.719	14.711	15.467
0.49979	0.99739	1.4917	2.0404	2.5343	3.1238	3.5421	4.1181	4.6043	5.0392	5.4592	6.0498	6.5216	7.2433	7.4376	8.0157	8.5018	9.0072	9.547	10.29	10.413	11.088	11.626	12.08	12.251	12.828	12.935	13.533	13.756	14.574	15.487
0.50601	0.97343	1.5323	2.0513	2.6094	3.0957	3.5498	4.1181	4.7312	4.9728	5.4093	5.9964	6.6006	7.1593	7.4622	8.0028	8.5018	8.9794	9.6342	10.123	10.49	11.12	11.659	11.978	12.406	12.757	13.168	13.496	13.812	14.672	15.185
0.48554	0.94986	1.5597	2.0404	2.5467	3.0677	3.5345	4.093	4.6223	5.0012	5.3993	5.9645	6.578	7.2915	7.4254	8.0157	8.475	8.9655	9.6196	10.244	10.443	11.024	11.577	12.063	12.441	12.828	13.114	13.46	13.849	14.691	15.105
0.48353	0.9532	1.5505	2.0567	2.6284	3.033	3.5804	4.1349	4.6313	4.9634	5.3993	6.0071	6.5893	7.1712	7.3765	8.0286	8.4483	9.063	9.6051	10.229	10.474	10.992	11.659	12.046	12.389	12.774	13.06	13.589	13.943	14.73	15.205
0.48755	0.94986	1.5277	2.0622	2.6157	3.0538	3.5804	4.093	4.5863	4.9634	5.4292	6.0284	6.6006	7.0168	7.4745	8.0286	8.475	8.9933	9.6342	10.336	10.382	10.881	11.61	11.995	12.389	12.828	13.006	13.496	13.868	14.789	15.066
0.4916	0.97683	1.5323	2.0404	2.6094	3.0677	3.5804	4.1013	4.6403	4.879	5.4994	5.9751	6.6574	7.005	7.4376	8.0028	8.65	9.0211	9.547	10.244	10.321	10.912	11.643	12.046	12.355	12.917	13.042	13.515	13.868	14.633	14.986
0.49568	0.92996	1.5414	2.0458	2.6157	3.0677	3.5881	4.1181	4.7221	4.9445	5.4192	5.9645	6.612	7.1116	7.4622	8.0157	8.5286	9.2461	9.5905	10.154	10.413	10.865	11.643	12.063	12.303	12.917	13.132	13.57	13.924	14.574	14.907
0.46774	0.96666	1.5368	2.1062	2.6284	3.0677	3.5117	4.1265	4.6133	5.0773	5.5702	5.9222	6.5667	7.1952	7.3765	8.0932	8.5152	8.9655	9.5036	10.154	10.382	10.992	11.577	12.063	12.32	12.899	13.096	13.515	13.831	14.477	15.548
0.47361	0.97683	1.5187	2.0731	2.6284	3.0122	3.5193	4.1939	4.6403	4.954	5.4692	5.8591	6.6006	7.1235	7.5733	8.1192	8.5959	8.7725	9.446	10.214	10.443	10.897	11.428	12.012	12.303	12.792	12.988	13.441	13.737	14.419	15.487
0.48554	0.96328	1.5187	2.035	2.5968	3.033	3.5269	4.245	4.6494	4.9164	5.5398	5.9116	6.6006	7.2674	7.4132	8.1192	8.5959	9.0351	9.5615	10.214	10.26	11.024	11.593	11.978	12.303	12.97	13.096	13.441	13.719	14.362	15.225
0.47165	0.97004	1.5052	2.0951	2.6094	3.0122	3.5269	4.2024	4.7038	4.954	5.5398	5.9222	6.6347	7.2312	7.3765	7.9259	8.542	9.077	9.6342	10.184	10.275	10.944	11.494	11.709	12.355	13.096	13.096	13.441	13.774	14.497	15.165
0.47165	0.98365	1.5097	2.1284	2.578	3.0677	3.4664	4.2024	4.6494	4.8604	5.5095	6.0712	6.6917	7.2312	7.4132	7.9771	8.6094	8.9933	9.5615	10.108	10.29	11.056	11.577	11.894	12.372	12.952	13.06	13.441	13.906	14.594	15.185
0.47558	0.98707	1.5277	2.1173	2.5343	3.0817	3.4664	4.1601	4.6403	4.9917	5.5702	5.9751	6.6006	7.2553	7.5733	7.9131	8.542	8.8687	9.5905	9.9883	10.397	10.928	11.61	12.029	12.441	12.704	13.06	13.423	13.812	14.323	15.326
0.48755	0.99739	1.5368	2.1006	2.5281	3.0607	3.5117	4.2621	4.6313	4.9164	5.4793	6.0071	6.5667	7.3037	7.5609	7.9515	8.5689	8.9516	9.576	10.154	10.336	11.04	11.347	11.961	12.424	12.633	13.042	13.332	13.981	14.304	15.085
0.48755	0.98365	1.5232	2.0622	2.6794	3.0399	3.489	4.2279	4.6403	4.9445	5.5297	5.9964	6.6574	7.1473	7.623	7.8748	8.6635	9.0211	9.576	10.169	10.275	11.152	11.445	11.944	12.251	12.899	13.024	13.35	13.981	14.574	15.528
0.48957	0.97004	1.5232	2.0786	2.5592	3.0747	3.5041	4.1181	4.6313	4.9728	5.3794	6.0071	6.6347	7.2553	7.5361	7.9387	8.6094	9.077	9.5615	10.154	10.567	11.072	11.56	11.944	12.424	12.917	12.845	13.46	13.981	14.516	14.966
0.4916	0.94986	1.5052	2.0951	2.553	3.033	3.5498	4.1181	4.6043	4.9445	5.4793	6.0391	6.6006	7.2312	7.4745	7.8494	8.7725	8.9377	9.576	10.154	10.397	10.96	13.186	12.063	12.303	12.721	12.988	13.57	14	14.672	14.986
0.48554	0.94986	1.5459	2.0896	2.5467	3.0607	3.565	4.1517	4.6223	4.9445	5.4192	6.0391	6.6347	7.1235	7.4868	7.8876	8.6229	8.9794	9.5905	10.214	10.49	10.881	11.577	12.182	12.355	12.774	12.845	13.515	14.019	14.73	15.285
0.48755	0.98707	1.5187	2.0841	2.6031	3.0399	3.4589	4.2109	4.6494	4.9917	5.4492	6.0071	6.6006	7.2072	7.4745	7.9003	8.4616	9.049	9.5325	10.275	10.413	11.024	11.494	12.285	12.493	12.845	12.935	13.533	14	14.497	15.066
0.48755	0.97683	1.5597	2.0622	2.6031	3.0538	3.4513	4.1517	4.5863	4.9917	5.4392	5.9858	6.578	7.2915	7.5114	7.9003	8.3552	9.063	9.5905	10.229	10.428	10.928	11.511	12.131	12.303	12.721	12.917	13.423	13.831	14.477	15.046
0.47165	0.97683	1.5368	2.0513	2.5717	3.0607	3.4814	4.1601	4.6765	4.9728	5.4093	5.8906	6.578	7.1593	7.4991	7.8367	8.4483	9.1613	9.4748	10.184	10.49	10.865	11.494	12.097	12.303	12.881	12.917	13.386	13.962	14.439	15.467
0.47755	0.97343	1.5232	2.0731	2.578	3.0399	3.4814	4.1601	4.6403	5.0392	5.3004	6.0177	6.5441	7.0878	7.5857	7.824	8.5286	8.9794	9.5615	10.229	10.428	10.865	11.445	12.131	12.563	12.935	12.988	13.405	13.943	14.497	15.306
0.4916	0.99394	1.5142	2.0458	2.5842	3.0053	3.4438	4.1265	4.5774	4.8418	5.4592	6.0071	6.5441	7.1952	7.4868	7.9771	8.5018	9.091	9.4892	10.275	10.552	10.944	11.494	12.046	12.528	12.792	12.988	13.552	14.019	14.458	14.594
0.47361	0.96328	1.5097	2.1117	2.5654	3.1097	3.5498	4.0514	4.5505	5.0107	5.4592	5.9433	6.6347	7.1354	7.6604	7.9771	8.475	8.9933	9.4172	10.123	10.536	10.992	11.478	12.131	12.372	12.757	13.132	13.515	14.019	14.652	15.105
0.46774	1.0043	1.5232	2.0458	2.5842	3.0399	3.4814	4.1181	4.6133	4.9258	5.5398	6.1142	6.5554	7.1952	7.3887	7.8876	8.4216	8.9655	9.5325	10.184	10.382	11.024	11.527	12.2	12.546	12.988	12.988	13.607	13.906	14.439	15.006
0.4916	1.0008	1.5459	2.0567	2.6094	3.0538	3.4739	4.1181	4.4531	5.0107	5.4994	5.9645	6.6347	7.0997	7.5485	7.824	8.3288	8.9239	9.547	10.169	10.505	11.104	11.478	12.029	12.372	12.952	12.845	13.644	13.812	14.555	15.65
0.48353	0.99739	1.5874	2.0677	2.6411	3.0468	3.489	4.1097	4.6313	5.0487	5.5297	5.9858	6.6688	7.1832	7.5238	7.9515	8.475	8.9239	9.5615	10.275	10.645	11.168	11.577	11.927	12.389	12.899	13.06	13.663	13.7	14.769	15.046
0.49773	0.9905	1.5689	2.0841	2.553	3.0399	3.4664	4.1349	4.6133	5.0202	5.5398	5.9539	6.646	7.1952	7.4991	7.9387	8.435	8.8274	9.547	10.443	10.397	11.136	11.56	12.012	12.651	12.739	13.114	13.423	13.756	14.769	15.105
0.45055	0.99739	1.5505	2.0513	2.5592	3.0887	3.4739	4.2024	4.5416	4.9728	5.4692	6.0712	6.3765	7.2072	7.3765	8.0028	8.3552	8.8136	9.4029	10.26	10.443	11.136	11.626	12.046	12.581	12.721	12.988	13.607	13.681	14.711	15.447
0.50601	1.0394	1.5323	2.0677	2.5968	3.0677	3.489	4.177	4.6043	5.0487	5.4592	5.9011	6.6006	7.2192	7.5238	7.9387	8.4483	8.9794	9.4892	10.199	10.428	11.104	11.527	11.995	12.493	12.757	13.168	13.533	13.626	14.633	15.63
0.46969	0.93326	1.5735	1.9866	2.6284	3.0677	3.5269	4.1855	4.5863	5.0297	5.5297	5.9539	6.4432	7.1832	7.4622	7.8748	8.5824	8.8824	9.6488	10.244	10.367	11.088	11.593	12.251	12.459	12.845	13.295	13.46	13.774	14.711	15.346
0.47165	0.97343	1.5643	2.0622	2.6411	3.0677	3.489	4.1265	4.6133	5.1061	5.5297	6.0177	6.6233	7.3037	7.4132	7.9003	8.5286	8.6907	9.4748	10.199	10.428	11.12	11.643	12.2	12.32	12.616	13.114	13.626	13.7	14.769	15.386
0.48153	0.91686	1.6014	2.0513	2.6538	3.0468	3.5117	4.1265	4.5863	4.9634	5.4592	6.0391	6.7146	7.2433	7.4499	7.8876	8.395	8.9239	9.5615	10.275	10.428	10.992	11.544	12.097	12.32	12.563	13.078	13.277	13.7	14.652	14.868
0.49364	0.96328	1.5505	2.0677	2.6538	3.1309	3.5041	4.1181	4.5953	5.0202	5.4793	6.0391	6.5104	7.1952	7.4009	7.9387	8.4884	8.8549	9.5325	9.9585	10.474	10.944	11.527	12.08	12.424	12.528	13.006	13.552	13.774	14.594	15.145
0.48957	0.97004	1.5459	2.1062	2.6475	3.1027	3.5193	4.1349	4.5863	4.9823	5.4994	6.0391	6.6347	7.3037	7.4254	7.9515	8.475	9.0211	9.6196	10.138	10.428	10.976	11.577	11.961	12.441	12.598	13.241	13.57	13.737	14.652	14.555
0.48957	0.97343	1.5414	2.0622	2.6347	3.026	3.4664	4.1517	4.6043	5.0012	5.5195	6.0498	6.5329	7.3522	7.3037	7.9643	8.4616	9.0211	9.5905	10.244	10.428	11.024	11.494	12.029	12.389	12.792	13.186	13.386	13.868	14.672	14.927
0.5102	0.99394	1.5368	2.0951	2.6347	3.0053	3.565	4.1013	4.4795	4.9352	5.5702	6.0605	6.5441	7.2553	7.6729	7.824	8.435	8.8687	9.4892	10.184	10.49	11.056	11.544	12.029	12.406	12.739	13.186	13.405	13.812	14.672	15.265
0.51441	0.98707	1.5689	2.0677	2.6794	3.0053	3.5041	4.1685	4.5061	4.9823	5.56	6.0927	6.646	7.2915	7.3887	8.0028	8.4483	8.8549	9.7073	10.138	10.413	11.104	11.379	11.995	12.389	12.686	13.168	13.259	13.887	14.927	14.809
0.48957	0.97683	1.5597	2.0622	2.6475	2.9985	3.5574	4.2109	4.6043	5.0392	5.5905	6.0927	6.612	7.2312	7.5981	8.0286	8.6094	8.8274	9.547	10.093	10.505	11.185	11.363	12.217	12.493	12.739	13.132	13.259	13.849	14.75	15.026
0.50186	0.97343	1.6014	2.0296	2.6031	3.026	3.5041	4.093	4.6947	4.9823	5.5398	6.2227	6.7605	7.34	7.4132	7.9259	8.2498	8.8549	9.576	10.063	10.459	11.024	11.379	12.303	12.598	12.881	13.078	13.405	13.793	14.769	14.927
0.48957	1.0008	1.6202	2.0458	2.5842	3.0538	3.489	4.0846	4.7587	5.0012	5.4994	6.1575	6.646	7.2674	7.4745	8.0544	8.3552	9.1191	9.576	10.093	10.614	11.088	11.363	12.234	12.511	12.669	13.06	13.241	13.774	14.75	14.73
0.5081	0.99739	1.5735	2.0731	2.578	3.0747	3.565	4.1013	4.6765	4.9728	5.4994	6.082	6.578	7.2072	7.4868	7.99	8.5689	9.063	9.6342	10.123	10.661	11.056	11.363	12.046	12.459	12.739	13.078	13.241	14.037	14.672	15.366
0.48153	0.98365	1.5597	2.1062	2.6411	3.033	3.5269	4.0348	4.6494	4.8604	5.4793	5.9539	6.4544	7.2312	7.5238	7.9643	8.5152	8.8549	9.5181	10.138	10.645	11.104	11.626	12.097	12.459	12.757	12.899	13.295	13.924	14.887	15.026
0.48957	0.98707	1.5505	2.0513	2.5717	3.0538	3.5574	4.0763	4.5953	5.0107	5.5499	6.082	6.578	7.1473	7.4991	7.8876	8.4216	8.9101	9.4892	10.169	10.692	11.136	11.544	12.029	12.528	12.563	13.15	13.204	14.056	14.594	14.927
0.48153	0.99394	1.5505	2.1062	2.6157	3.0747	3.5345	4.0846	4.6494	5.0773	5.5499	6.0498	6.6347	7.1593	7.6604	8.0286	8.5018	8.9101	9.5181	10.214	10.552	11.12	11.659	12.131	12.528	12.739	13.168	13.386	14	14.613	15.346
0.50393	0.98707	1.5551	2.1228	2.6094	3.1168	3.5574	4.1517	4.5863	5.0582	5.6928	6.0391	6.6574	7.2795	7.5485	8.1712	8.5152	8.8687	9.5615	10.229	10.598	11.249	11.743	12.046	12.459	12.774	13.168	13.368	13.868	14.789	15.046
0.48957	0.9905	1.5505	2.0622	2.6157	3.138	3.5804	4.1097	4.7038	5.0202	5.6007	6.0391	6.6574	7.0759	7.5114	7.9643	8.475	8.8824	9.576	10.108	10.459	11.185	11.643	12.097	12.459	12.952	13.078	13.46	13.831	14.613	15.306
0.49364	0.99739	1.5459	2.0026	2.6094	3.1168	3.6577	4.093	4.6675	5.0965	5.4392	6.0177	6.5893	7.1832	7.5361	7.9003	8.6364	8.7999	9.5325	10.199	10.583	11.201	12.012	12.148	12.424	12.917	13.241	13.423	13.906	14.594	15.026
0.50393	1.0043	1.5414	2.0841	2.6221	3.0887	3.5117	4.0763	4.6403	5.0012	5.5297	5.9858	6.7375	7.1832	7.6479	8.0028	8.4616	8.7862	9.547	10.214	10.583	11.072	11.81	12.131	12.441	12.863	13.186	13.533	13.906	14.574	15.528
0.47165	0.98365	1.5232	2.1451	2.6094	3.0399	3.5727	4.0763	4.6494	5.0012	5.5398	6.0498	6.726	7.2795	7.4868	7.9771	8.6364	8.7725	9.5905	10.184	10.505	11.104	11.726	11.961	12.546	12.863	13.15	13.35	13.887	14.691	15.285
0.48755	1.0113	1.5414	2.0242	2.6221	3.0122	3.6344	4.1013	4.6133	4.9823	5.5398	5.9539	6.4992	7.1473	7.4499	7.8748	8.5286	8.8549	9.446	10.199	10.583	10.992	11.709	12.131	12.476	12.899	13.096	13.423	13.849	14.555	15.066
0.49364	0.99394	1.5414	2.0513	2.6157	3.0399	3.5498	4.0763	4.6765	4.9634	5.5195	6.0071	6.6688	7.1354	7.4745	7.9003	8.5555	8.8411	9.5905	10.199	10.536	11.12	11.643	12.114	12.459	12.81	13.042	13.441	13.812	14.691	14.966
0.50393	0.97004	1.5414	2.0296	2.6031	3.033	3.4814	4.0183	4.6403	5.0297	5.4994	6.0605	6.6233	7.4254	7.5361	8.0673	8.435	8.8549	9.7073	10.26	10.382	10.944	11.626	12.08	12.528	12.792	13.132	13.368	13.924	14.633	15.427
0.49568	0.9905	1.4739	2.0404	2.5717	3.0607	3.565	4.0846	4.6494	4.8325	5.4994	6.0284	6.7031	7.1712	7.4622	7.8748	8.435	8.9794	9.547	10.154	10.474	11.008	11.643	12.182	12.686	12.739	13.06	13.626	13.626	14.516	15.145
0.5123	0.95656	1.5142	2.0896	2.6157	3.0191	3.6035	4.1013	4.7679	4.9823	5.5095	6.0927	6.5554	7.2915	7.4745	7.9643	8.475	8.9655	9.6634	10.351	10.382	10.928	11.693	12.217	12.424	12.739	13.096	13.533	13.812	14.458	14.986
0.47755	1.0113	1.4431	2.0896	2.6347	3.0677	3.6577	4.1517	4.7038	4.9258	5.56	5.9964	6.5441	7.2192	7.4745	7.8621	8.5152	8.9933	9.7366	10.138	10.583	10.881	11.726	11.927	12.598	12.546	13.06	13.57	13.793	14.594	14.907
0.49364	0.99739	1.5323	2.0622	2.5592	3.1097	3.5804	4.1181	4.6584	4.8232	5.6517	6.0071	6.5329	7.1832	7.4991	8.0673	8.4483	9.049	9.6051	10.093	10.676	10.928	11.843	12.063	12.616	12.792	13.241	13.57	13.644	14.672	15.066
0.48957	0.98707	1.4962	2.0404	2.553	3.1027	3.5193	4.068	4.6675	5.0869	5.5398	6.0177	6.646	7.1952	7.3279	7.9643	8.5018	9.077	9.7219	9.9883	10.474	11.088	11.693	12.012	12.616	12.721	13.186	13.441	13.756	14.439	15.225
0.49364	0.99394	1.5232	2.0188	2.5717	3.1592	3.5345	4.0846	4.6675	5.0678	5.5095	5.9858	6.578	7.2072	7.3037	7.9643	8.4616	9.0211	9.678	10.351	10.754	11.072	11.743	12.217	12.476	12.598	12.988	13.552	13.887	14.4	14.868
0.48353	1.0113	1.5368	2.0786	2.5592	3.0747	3.5193	4.093	4.6403	5.0012	5.56	5.9645	6.612	7.2312	7.4254	8.0415	8.4616	9.049	9.6926	10.184	10.897	11.136	11.61	12.097	12.528	12.581	13.204	13.295	13.924	14.497	15.046
0.49568	0.98365	1.5689	2.0731	2.6031	3.1097	3.5345	4.093	4.5953	5.1253	5.5702	5.9858	6.646	7.2072	7.4132	8.1712	8.4616	8.9516	9.6634	10.229	10.692	11.12	11.643	12.08	12.598	12.721	13.368	13.405	13.831	14.574	15.366
0.48153	0.99739	1.5142	2.0896	2.5717	3.1238	3.489	4.093	4.5505	4.9917	5.5803	6.0071	6.5441	7.3279	7.4376	7.9771	8.475	8.8687	9.5905	10.29	10.692	11.12	11.626	12.063	12.476	12.581	13.222	13.332	13.849	14.652	15.165
0.49364	1.0008	1.5232	2.1006	2.4911	3.1877	3.5345	4.068	4.5953	5.0487	5.5905	5.8068	6.5441	7.2312	7.3522	7.9771	8.4884	8.8963	9.5036	10.108	10.723	10.976	11.643	12.131	12.563	12.704	13.313	13.423	13.868	14.652	15.528
0.49773	0.99394	1.5232	2.0951	2.6411	3.0957	3.5421	4.0763	4.6494	4.9352	5.5499	5.9751	6.5554	7.3158	7.4009	8.0286	8.5152	8.9101	9.7954	10.199	10.49	11.056	11.494	12.114	12.721	12.721	13.241	13.441	13.774	14.516	15.085
0.49773	0.97004	1.5551	2.0026	2.5717	3.1027	3.5498	4.0763	4.6584	4.9823	5.5499	6.0071	6.8066	7.0404	7.4376	7.9771	8.5959	9.0351	9.6342	10.184	10.692	11.265	11.61	12.029	12.511	12.669	13.132	13.241	13.831	14.574	15.265
0.50601	1.0217	1.5323	1.9653	2.6858	3.1238	3.5345	4.1181	4.5863	5.0202	5.5398	6.0498	6.6802	7.2312	7.4376	7.8748	8.4483	8.9655	9.7807	10.184	10.474	11.056	11.577	12.029	12.389	12.669	13.168	13.57	13.793	14.574	15.006
0.49364	0.98365	1.5232	2.0951	2.5968	3.0817	3.5345	4.093	4.5505	4.9445	5.5803	5.9645	6.612	7.2072	7.4745	8.0803	8.3552	8.9516	9.6196	10.199	10.614	11.104	11.56	12.063	12.389	12.651	13.096	13.533	13.849	14.535	15.165
0.50186	1.0147	1.5232	2.0458	2.6794	2.9985	3.4966	4.0266	4.5863	5.0012	5.5095	5.9433	6.6917	7.1116	7.4254	7.9259	8.5018	8.9794	9.6051	10.275	10.598	11.072	11.445	11.995	12.355	12.721	13.06	13.737	13.793	14.4	15.245
0.48755	1.0182	1.5323	2.0296	2.5158	3.0957	3.5117	4.0348	4.6494	4.9634	5.5297	6.0177	6.4992	7.0641	7.4254	7.8621	8.4884	8.9377	9.5325	10.123	10.723	11.104	11.511	12.097	12.268	12.633	13.042	13.7	13.868	14.555	15.326
0.50186	0.96666	1.5232	2.0404	2.6157	3.0817	3.565	4.1181	4.6043	5.0392	5.4492	6.0177	6.7375	7.1473	7.3644	8.0544	8.5286	8.9655	9.5615	10.123	10.552	11.136	11.61	11.978	12.337	12.669	13.15	13.552	14	14.4	14.947
0.48957	1.0217	1.5277	2.0841	2.5405	3.0817	3.5421	4.0763	4.5505	4.9445	5.4994	6.0071	6.5216	7.1712	7.4009	7.9259	8.475	9.091	9.547	10.078	10.583	11.168	11.643	12.114	12.424	12.899	13.204	13.57	14.189	14.497	15.245
0.48755	0.98365	1.5277	2.1789	2.578	3.0677	3.5881	4.0514	4.5416	4.9917	5.5095	5.9328	6.612	7.2072	7.5609	7.8494	8.5959	9.1472	9.6342	10.138	10.49	11.056	11.626	11.877	12.217	12.863	13.204	13.496	13.831	14.652	15.026
0.50393	1.0008	1.5052	2.0296	2.5592	3.0817	3.5269	4.0846	4.5774	5.0202	5.4492	6.0391	6.5893	7.2192	7.6355	7.9771	8.5689	9.1331	9.5905	10.244	10.459	11.024	11.527	11.776	12.268	12.774	13.114	13.681	14.075	14.711	15.245
0.51441	0.9905	1.5187	2.1228	2.6157	3.0538	3.565	4.0597	4.5061	5.0297	5.4192	6.0071	6.5329	7.2192	7.4622	8.0673	8.5824	9.0072	9.6196	10.199	10.49	10.928	11.56	11.978	12.511	12.774	13.024	13.7	13.906	14.927	15.185
0.48957	1.0078	1.5551	2.0731	2.5158	3.0399	3.5345	4.1265	4.5953	5.0869	5.4192	5.9964	6.6917	7.1832	7.5238	8.0544	8.542	9.0211	9.6196	10.275	10.583	10.96	11.527	12.2	12.511	12.81	13.168	13.552	13.831	14.828	15.467
0.49364	1.0008	1.5232	2.0677	2.5842	3.1027	3.5574	4.0846	4.5416	5.0487	5.4492	5.9858	6.5667	7.2795	7.4868	8.0157	8.5152	9.063	9.5905	10.154	10.459	10.897	11.61	12.029	12.581	12.757	13.132	13.515	13.868	14.868	15.085
0.47755	0.99394	1.5459	2.0731	2.6221	3.0191	3.5574	4.1013	4.5238	5.1253	5.4592	6.0177	6.5554	7.1473	7.3644	8.0803	8.4483	9.1191	9.8397	10.063	10.754	10.881	11.626	12.097	12.704	12.81	13.006	13.607	13.887	14.633	15.205
0.4916	0.98707	1.4917	2.0951	2.6538	3.0677	3.5269	4.1097	4.5863	5.0297	5.4492	6.1683	6.6006	7.3279	7.4499	7.8114	8.5018	9.2319	9.576	10.063	10.552	11.04	11.577	12.2	12.633	12.739	12.899	13.386	13.868	14.439	15.306
0.48554	0.99394	1.5323	2.0896	2.578	3.0677	3.5041	4.1181	4.5863	4.9445	5.4793	6.0284	6.5216	7.1354	7.3887	7.9643	8.6364	9.1472	9.5905	10.093	10.351	11.12	11.743	11.961	12.616	12.686	12.952	13.405	13.868	14.672	15.406
0.4916	1.0043	1.5142	2.1228	2.6031	3.026	3.5193	4.0846	4.5774	4.907	5.4893	6.0712	6.6006	7.0523	7.4622	8.0673	8.5286	9.1331	9.6926	10.093	10.474	10.897	11.544	12.097	12.406	12.721	12.881	13.46	13.887	14.516	15.225
0.48554	0.9905	1.5277	2.0841	2.5905	3.0399	3.5193	4.0763	4.5863	4.9634	5.5195	6.0712	6.6233	7.1712	7.4745	8.1322	8.5555	9.1191	9.6926	10.154	10.536	11.056	11.593	11.927	12.406	12.845	13.096	13.441	13.7	14.594	15.185
0.49568	1.0536	1.5007	2.0242	2.5905	2.9916	3.5041	4.1181	4.5505	4.9634	5.4994	6.1035	6.646	7.2312	7.5733	8.0544	8.6229	9.1754	9.678	10.214	10.397	11.072	11.56	11.826	12.511	12.739	13.024	13.132	13.756	14.613	15.447
0.48755	1.0147	1.5277	2.0242	2.6923	3.0191	3.5498	4.068	4.6043	4.9445	5.6415	6.0284	6.6574	7.1473	7.4622	8.0415	8.6094	9.1895	9.678	10.184	10.367	10.96	11.593	12.2	12.389	12.792	13.042	13.46	13.906	14.711	14.769
0.48153	1.0253	1.5368	2.0134	2.6411	2.9847	3.5957	4.3656	4.6223	4.879	5.56	6.0498	6.6233	7.0997	7.5114	8.0157	8.5824	9.1895	9.6342	10.093	10.428	10.928	11.396	12.2	12.372	12.704	13.006	13.386	13.831	14.769	15.046
0.5081	1.0253	1.5459	2.0458	2.5905	3.0677	3.489	4.1265	4.6584	5.0107	5.4793	6.0498	6.5216	7.1712	7.5238	8.0673	8.5152	9.2177	9.6196	10.063	10.567	10.928	11.511	12.029	12.303	12.792	13.186	13.46	13.774	14.887	15.066
0.49979	1.0113	1.4962	2.0622	2.6031	3.0468	3.6112	4.1855	4.5953	4.9917	5.4994	6.0071	6.578	7.1235	7.4132	8.1062	8.6229	9.2602	9.5325	10.154	10.49	10.881	11.494	12.08	12.165	12.757	13.06	13.681	13.849	14.672	15.085
0.5102	0.98024	1.5277	2.0404	2.6157	3.0122	3.4664	4.1855	4.5149	4.954	5.5195	6.0927	6.5441	7.1832	7.4745	8.1712	8.6364	9.0211	9.547	10.018	10.413	10.912	11.643	12.08	12.459	12.81	13.35	13.607	13.849	14.555	15.285
0.49773	1.0008	1.5505	2.0296	2.6666	2.9985	3.5345	4.1349	4.6494	5.0392	5.6313	6.082	6.6233	7.0997	7.3158	8.1452	8.5959	8.9794	9.6488	10.123	10.521	11.008	11.593	12.097	12.493	12.493	13.114	13.478	13.906	14.574	15.366
0.48755	0.98365	1.5097	2.0896	2.6221	3.0122	3.565	4.2109	4.6403	4.9917	5.6313	6.0284	6.5554	7.3279	7.4745	8.1974	8.5018	9.063	9.6342	10.093	10.382	10.928	11.478	12.182	12.355	12.81	13.096	13.423	14.247	14.574	15.245
0.49979	0.98707	1.5505	2.0622	2.6094	3.0399	3.5421	4.2024	4.6133	5.0297	5.6415	6.0177	6.4098	7.1473	7.4009	8.1192	8.5018	9.105	9.678	10.275	10.567	11.152	11.61	12.2	12.285	12.845	13.332	13.552	13.7	14.477	15.205
0.49364	0.97683	1.4962	2.0731	2.5654	2.9301	3.5041	4.1517	4.6043	5.0392	5.5803	6.0284	6.4544	7.0404	7.3765	8.1322	8.6094	9.049	9.7513	10.244	10.536	10.96	11.709	12.268	12.476	12.757	13.114	13.441	13.887	14.633	15.165
0.47954	0.96328	1.5277	2.0951	2.6221	3.0887	3.4513	4.177	4.6947	5.0773	5.5803	6.0284	6.5104	7.2192	7.4499	8.1843	8.5689	8.9655	9.6342	10.367	10.413	11.152	11.626	12.097	12.476	12.917	12.935	13.46	14.094	14.594	15.265
0.48957	0.97004	1.5368	2.0951	2.6475	3.0122	3.5957	4.1181	4.6223	5.0678	5.6313	6.0071	6.6233	7.0523	7.5238	8.276	8.5286	8.8963	9.576	10.321	10.567	11.008	11.494	12.217	12.285	12.881	12.739	13.368	13.943	14.691	15.285
0.50393	1.0043	1.5505	2.0188	2.6031	3.0053	3.5345	4.1265	4.713	5.1349	5.6211	5.9858	6.646	7.0641	7.4009	8.0544	8.5959	8.9933	9.6488	10.214	10.536	10.928	11.693	12.165	12.441	12.845	13.204	13.423	13.924	14.828	15.185
0.49364	1.0008	1.5323	2.0296	2.5905	3.1027	3.5421	4.0597	4.5863	5.1253	5.6007	6.125	6.6006	7.1832	7.5361	8.0028	8.6229	9.063	9.7073	10.26	10.505	11.088	11.544	12.165	12.563	12.863	13.024	13.478	13.849	14.535	15.205
0.49364	1.0008	1.5187	2.1062	2.578	3.0468	3.5574	4.0266	4.6584	5.0297	5.56	6.082	6.6233	7.1952	7.623	8.0286	8.5959	9.0211	9.678	10.199	10.443	10.833	11.626	12.114	12.493	12.774	13.168	13.241	13.887	14.672	15.085
0.50393	1.0253	1.5097	2.0786	2.6094	3.033	3.6112	4.1097	4.6856	5.1253	5.5095	6.1035	6.578	7.2433	7.5733	8.0544	8.65	9.0211	9.678	10.26	10.676	10.865	11.626	12.097	12.424	12.792	13.078	13.277	14	14.535	15.165
0.49773	1.0147	1.5142	2.0731	2.5592	3.0817	3.565	4.1097	4.6675	5.0012	5.56	6.0498	6.6006	7.2192	7.5238	8.0157	8.5959	8.8824	9.6196	10.275	10.459	10.928	11.56	12.063	12.493	12.704	13.096	13.423	13.943	14.555	15.306
0.48755	0.97683	1.5052	2.1006	2.6411	2.9847	3.5804	4.093	4.6675	5.0012	5.6928	6.0605	6.578	7.2072	7.5857	8.0544	8.6094	8.9655	9.6051	10.244	10.505	11.412	11.676	12.029	12.355	12.845	13.15	13.607	13.812	14.672	15.265
0.49364	0.96328	1.4962	2.0786	2.6157	3.0399	3.5881	4.093	4.6403	4.9917	5.5195	6.0498	6.6006	7.1116	7.6355	8.0157	8.5824	8.8411	9.5905	10.382	10.382	11.104	11.659	11.927	12.32	12.757	13.114	13.423	14.132	14.652	15.125
0.48957	1.0182	1.5097	2.0622	2.5281	3.0122	3.5421	4.1097	4.6765	5.0297	5.5297	5.9964	6.5216	7.1593	7.5733	8.0544	8.5959	8.8411	9.5905	10.428	10.443	10.865	11.659	11.978	12.303	12.81	13.277	13.478	13.924	14.652	14.809
0.48554	0.99394	1.5551	2.0513	2.6094	2.9573	3.5421	4.093	4.7221	5.0012	5.5398	6.0498	6.4432	7.1235	7.5609	8.0544	8.5959	8.9794	9.576	10.321	10.413	11.072	11.577	11.927	12.355	12.845	13.078	13.478	13.812	14.652	15.285
0.45812	0.94986	1.5414	2.0677	2.6031	2.9573	3.4966	4.1097	4.7863	5.0107	5.4893	5.9116	6.4992	7.1593	7.6355	8.0544	8.6229	9.0211	9.6488	10.26	10.443	11.12	11.577	11.894	12.337	12.881	13.168	13.423	13.887	14.907	14.75
0.46195	0.99394	1.5505	2.0731	2.5842	3.033	3.5498	4.177	4.713	5.0012	5.4994	5.9116	6.578	7.1473	7.5981	8.1712	8.5959	9.0351	9.678	10.321	10.629	10.96	11.676	11.944	12.217	12.792	13.386	13.386	13.831	14.809	15.205
0.49773	0.97683	1.5459	2.0896	2.6157	3.0747	3.489	4.1265	4.6675	4.9634	5.5905	5.9539	6.5216	7.0997	7.5361	8.1322	8.5018	9.0351	9.547	10.351	10.567	11.201	11.643	11.961	12.303	12.845	13.277	13.386	13.793	14.594	15.346
0.48957	0.97343	1.4828	2.0731	2.6347	2.9985	3.489	4.1349	4.6223	5.0012	5.5095	6.0177	6.5441	7.0523	7.3644	8.1192	8.5689	8.9101	9.6051	10.367	10.505	11.12	11.643	11.81	12.337	12.81	13.006	13.423	13.849	14.497	15.326
0.46774	0.96666	1.5323	2.0896	2.6347	3.0191	3.5498	4.1265	4.6494	5.0202	5.5803	6.0071	6.5893	7.0878	7.4132	8.1452	8.5689	8.9516	9.678	10.305	10.474	10.992	11.412	11.726	12.441	12.721	13.15	13.423	13.849	14.574	14.769
0.47361	0.98024	1.5368	2.1117	2.6538	3.026	3.5498	4.2109	4.5863	5.0582	5.5499	6.0284	6.5893	7.1712	7.3522	8.1062	8.5152	9.1191	9.6342	10.214	10.521	11.04	11.544	11.726	12.493	12.686	12.881	13.441	13.887	14.458	15.105
0.48153	0.96666	1.5097	2.1284	2.6347	3.026	3.5881	4.1855	4.5774	4.9634	5.6007	6.1035	6.5104	7.2915	7.3887	8.1712	8.3552	8.8687	9.576	10.199	10.49	11.04	11.659	11.843	12.372	12.546	13.204	13.552	13.831	14.477	14.868
0.4916	1.0182	1.5232	2.0677	2.6538	3.0399	3.5269	4.1685	4.6403	4.9917	5.56	6.0391	6.5104	7.2192	7.3522	8.1452	8.5824	8.9933	9.5181	10.214	10.567	11.168	11.428	11.843	12.285	12.686	13.114	13.295	13.906	14.535	15.63
0.49568	0.97343	1.5097	2.0951	2.5842	2.9916	3.5269	4.177	4.5774	4.9445	5.5095	6.0391	6.5329	7.1952	7.4009	8.2104	8.435	8.9516	9.4892	10.199	10.428	11.233	11.978	11.927	12.251	12.633	13.06	13.681	13.887	14.594	15.326
0.49568	0.95656	1.5187	2.0731	2.5842	3.0191	3.5574	4.2279	4.6223	4.9728	5.5095	6.0177	6.5104	7.1593	7.4132	8.0803	8.5152	8.9794	9.5905	10.244	10.382	11.152	11.693	11.978	12.2	12.686	13.259	13.423	13.962	14.535	14.848
0.4916	1.0008	1.5232	2.0731	2.5968	3.0538	3.489	4.2279	4.5863	5.0202	5.5297	6.0284	6.5441	7.1116	7.5114	8.0673	8.5959	9.0211	9.4892	10.26	10.583	11.185	11.61	12.097	12.651	12.704	12.935	13.46	14.17	14.516	14.907
0.48554	1.0008	1.5007	2.0786	2.6031	3.026	3.5345	4.2279	4.5863	5.0487	5.5499	6.0498	6.5216	7.1354	7.4622	8.1062	8.3818	8.9794	9.6051	10.305	10.567	11.088	11.726	12.114	12.372	12.899	13.006	13.533	13.981	14.672	15.125
0.49364	0.99394	1.4695	2.0841	2.6031	2.9985	3.5117	4.2279	4.6223	5.0012	5.3894	6.0498	6.612	7.2072	7.4499	8.1062	8.542	8.9933	9.576	10.305	10.552	11.072	11.577	12.2	12.441	12.863	13.042	13.15	13.849	14.613	15.185
0.48153	1.0078	1.5097	2.0786	2.6347	3.0053	3.5269	4.2024	4.5327	5.0678	5.6517	6.1466	6.4879	7.1952	7.3887	8.0932	8.475	9.0351	9.576	10.336	10.505	10.992	11.643	12.165	12.372	12.97	12.917	13.496	14	14.907	15.205
0.50186	0.98024	1.5597	2.0951	2.6347	3.0468	3.489	4.1685	4.5595	4.9823	5.4492	6.19	6.5329	7.1832	7.3765	8.1452	8.475	9.0072	9.5036	10.351	10.428	10.976	11.709	12.2	12.406	12.757	12.97	13.405	14.094	14.75	15.366
0.49364	0.99394	1.5505	2.1006	2.5968	3.0538	3.5574	4.1855	4.6043	5.0202	5.5195	6.0284	6.5441	7.2192	7.3887	8.0544	8.5555	9.3171	9.5615	10.397	10.49	10.944	11.593	12.182	12.493	12.863	13.078	13.552	14.019	14.535	15.145
0.48153	0.9905	1.5142	2.0896	2.6347	3.0677	3.4289	4.2279	4.5774	5.0297	5.4692	6.1358	6.7031	7.1832	7.3522	7.9515	8.475	9.105	9.6342	10.305	10.567	11.04	11.659	12.114	12.285	12.899	13.024	13.533	14	14.789	15.125
0.5123	1.0008	1.5874	2.0513	2.6411	3.0191	3.489	4.1349	4.5238	4.9164	5.4592	6.1575	6.578	7.1832	7.3887	7.9259	8.2892	9.0351	9.6342	10.214	10.49	11.056	11.693	12.217	12.441	12.881	13.024	13.496	13.849	14.828	15.046
0.5123	1.0008	1.5368	2.0896	2.6666	3.0747	3.5193	4.1685	4.6313	5.1061	5.5297	6.1791	6.6802	7.1952	7.4132	7.9771	8.5152	9.1191	9.6051	10.229	10.397	11.168	11.693	12.234	12.546	13.06	13.042	13.478	13.924	14.848	15.125
0.49773	1.0078	1.5781	2.1228	2.6094	3.0677	3.5041	4.1181	4.5595	5.0012	5.5803	6.2118	6.6347	7.1354	7.4009	7.9387	8.5018	8.9933	9.6051	10.214	10.336	10.881	11.693	12.029	12.651	12.792	13.078	13.46	13.906	14.75	15.165
0.51441	1.0217	1.5414	2.0188	2.5467	3.1027	3.5881	4.1265	4.5863	5.1736	5.5095	6.1683	6.646	7.0997	7.4499	7.9131	8.5152	9.0351	9.5615	10.26	10.26	10.849	11.709	11.978	12.669	12.845	12.917	13.46	13.943	14.652	15.145
0.50186	1.0113	1.5232	2.0513	2.553	3.1097	3.5269	4.2194	4.6494	5.0392	5.4692	6.1358	6.5441	7.0523	7.4376	7.8114	8.5959	9.0351	9.5615	9.9734	10.275	10.96	11.544	12.148	12.372	12.81	12.952	13.607	13.981	14.691	15.145
0.5123	0.95656	1.5052	2.0513	2.5467	3.033	3.5269	4.1349	4.5774	5.0965	5.4093	6.1358	6.5893	7.0523	7.4622	7.9131	8.6635	9.1331	9.6342	10.169	10.321	10.897	11.527	12.131	12.546	12.739	12.881	13.7	14.075	14.887	15.145
0.48957	0.98024	1.5052	2.0513	2.6094	3.0538	3.4966	4.1349	4.5774	5.0392	5.5398	6.1035	6.6006	7.0997	7.4745	7.8494	8.65	9.0211	9.6342	10.138	10.397	10.912	11.593	12.2	12.337	12.704	13.096	13.626	13.831	14.769	15.265
0.48755	0.96666	1.5052	2.0677	2.6094	3.0399	3.5574	4.1601	4.5595	4.9917	5.4692	6.1035	6.5554	7.1832	7.5485	7.9131	8.65	9.077	9.6342	9.9734	10.305	11.072	11.511	12.097	12.337	12.881	13.006	13.57	13.7	14.672	15.63
0.49568	0.98365	1.4784	2.0458	2.5905	3.0817	3.5193	4.1181	4.5327	5.0202	5.56	6.125	6.578	7.0878	7.5857	7.8876	8.7043	9.1613	9.6488	10.552	10.321	11.233	11.544	12.08	12.493	12.845	13.042	13.515	13.719	14.672	15.225
0.50186	0.96328	1.4828	2.0296	2.5592	3.026	3.4814	4.1349	4.5238	5.1157	5.5702	6.0927	6.6233	7.0997	7.5609	7.9131	8.4616	8.9794	9.576	10.138	10.305	11.265	11.61	12.046	12.372	12.757	12.952	13.57	13.868	14.613	15.265
0.49568	0.99394	1.5052	2.1173	2.6284	3.0468	3.5498	4.1517	4.5684	4.907	5.5499	6.0498	6.7146	7.1235	7.4499	7.9387	8.5152	8.8687	9.6342	10.169	10.382	11.185	11.676	12.012	12.476	12.828	12.952	13.533	13.793	14.574	14.809
0.5123	0.97004	1.5368	2.0622	2.5905	3.033	3.5574	4.1265	4.6765	5.0869	5.5803	6.0712	6.578	7.1473	7.4009	7.9131	8.5286	8.9655	9.4316	10.229	10.552	11.024	11.577	12.046	12.424	12.863	13.114	13.46	13.793	14.555	15.386
0.47954	0.97343	1.5232	2.0896	2.6094	3.0122	3.5117	4.1517	4.5595	5.1833	5.5398	6.2009	6.6006	7.1593	7.5238	7.9771	8.475	9.0072	9.899	10.199	10.567	11.072	11.527	12.012	12.303	12.81	12.988	13.423	13.793	14.769	15.366
0.48353	1.0008	1.4651	2.0951	2.578	3.033	3.5193	4.1097	4.5149	5.0678	5.6007	6.2664	6.612	7.1593	7.5857	7.9387	8.5018	9.0211	9.7073	10.275	10.474	11.136	11.544	12.114	12.355	12.863	12.97	13.386	13.887	14.535	15.366
0.48153	0.99394	1.5277	2.0896	2.6094	3.0191	3.489	4.1601	4.5505	5.0297	5.6109	6.2773	6.5554	7.2192	7.5733	8.0415	8.475	9.105	9.6634	10.184	10.474	11.008	11.544	12.148	12.424	12.774	12.988	13.515	13.981	14.75	14.986
0.48554	0.99394	1.5052	2.1228	2.5842	3.0817	3.5269	4.1433	4.5505	5.0012	5.6723	6.2009	6.6347	7.1712	7.5114	8.0286	8.5018	8.9239	9.5615	10.26	10.474	10.96	11.494	12.012	12.546	12.581	12.97	13.35	14.019	14.516	15.205
0.51865	0.9905	1.5187	2.0896	2.5654	3.1238	3.5269	4.0514	4.6313	5.1349	5.662	6.125	6.5893	7.0759	7.5609	7.8748	8.4483	8.9933	9.5036	10.169	10.49	10.992	11.412	12.012	12.285	12.686	13.186	13.552	13.962	14.613	15.589
0.49979	0.97683	1.5232	2.0677	2.6157	3.0747	3.5193	4.068	4.6133	5.0012	5.6007	6.2227	6.4098	7.0523	7.5238	7.9643	8.435	9.049	9.5181	10.093	10.336	10.849	11.511	12.097	12.441	12.669	12.988	13.496	14.019	14.907	15.085
0.48554	0.98707	1.5323	2.1006	2.6284	3.1027	3.5421	4.0597	4.5684	5.0487	5.6517	6.1466	6.5554	7.1235	7.4622	8.0415	8.4616	8.8824	9.6488	10.138	10.49	10.739	11.56	12.08	12.651	12.81	13.204	13.423	14.056	14.672	15.326
0.49773	0.9905	1.5097	2.0567	2.6411	3.0053	3.5041	4.1097	4.5863	4.954	5.5905	6.125	6.5329	7.2192	7.7231	8.0028	8.5152	9.063	9.678	10.138	10.598	10.817	11.544	11.944	12.372	12.792	13.132	13.313	13.943	14.75	14.809
0.49773	0.9905	1.5323	2.0404	2.6538	3.0817	3.5117	4.1601	4.5327	5.0107	5.5095	6.1791	6.578	7.0404	7.5114	8.0415	8.6229	9.0211	9.6926	10.123	10.428	10.976	11.659	11.978	12.251	12.863	13.042	13.478	13.868	14.439	15.671
0.49979	1.0182	1.5505	2.0786	2.5842	3.0887	3.5421	4.1433	4.5953	4.8697	5.6007	6.125	6.6006	7.0759	7.4499	7.9771	8.6229	9.049	9.6488	10.26	10.351	10.897	11.56	12.029	12.372	12.739	13.078	13.515	13.887	14.633	14.691
0.48755	0.98365	1.5828	2.0731	2.6094	3.033	3.4364	4.1349	4.5863	4.9445	5.5398	6.0712	6.4992	7.0878	7.4745	8.0286	8.542	9.091	9.6196	10.108	10.382	10.96	11.626	11.911	12.493	12.721	13.096	13.423	14.019	14.769	15.145
0.48755	1.0288	1.5323	2.0622	2.6858	3.033	3.5041	4.0846	4.6043	5.0487	5.6109	6.0927	6.5667	7.0878	7.6729	7.99	8.4483	9.1613	9.6342	10.123	10.443	10.897	11.626	11.978	12.424	12.669	13.096	13.441	13.887	14.633	15.125
0.49568	0.97004	1.4962	2.1062	2.6411	3.0053	3.4589	4.2024	4.6223	5.0582	5.4893	6.0712	6.7031	7.1116	7.4254	8.0803	8.5152	9.0072	9.5036	10.214	10.443	10.928	11.726	12.029	13.006	12.669	13.06	13.496	13.793	14.652	15.366
0.49773	1.0253	1.5781	2.0841	2.6475	2.9985	3.5193	4.2194	4.5595	5.1061	5.4893	6.0605	6.5667	7.1235	7.6729	8.0415	8.5018	9.049	9.6634	10.169	10.428	10.817	11.759	11.843	12.511	12.774	13.114	13.295	13.943	14.672	15.225
0.48755	0.98707	1.5643	2.0677	2.6031	3.0957	3.4664	4.3309	4.5774	5.1349	5.4492	6.1035	6.612	7.1712	7.3765	7.99	8.4216	9.0072	9.547	10.199	10.443	10.976	11.659	11.944	12.441	12.774	13.042	13.386	13.849	14.73	15.326
0.48153	0.9905	1.5505	2.0622	2.6031	2.971	3.5117	4.2109	4.5505	5.0487	5.6007	5.9645	6.6006	7.1354	7.4991	8.0028	8.4083	9.0351	9.6196	10.138	10.413	10.944	11.759	12.029	12.406	12.721	12.988	13.496	14.019	14.266	15.006
0.49979	0.95991	1.5232	2.0567	2.6157	3.0191	3.4966	4.1181	4.5953	5.0965	5.5905	6.0391	6.6006	7.1593	7.6729	7.9643	8.3552	9.077	9.6196	10.093	10.367	11.024	11.544	11.826	12.546	12.704	12.863	13.441	14.019	14.691	15.346
0.49364	0.97004	1.5097	2.0622	2.6094	3.0538	3.5269	4.1433	4.4883	5.0965	5.4192	6.0391	6.5441	7.1354	7.4132	8.1192	8.4616	9.0072	9.5325	9.9734	10.536	11.008	11.527	12.234	12.633	12.757	12.988	13.368	13.906	14.887	15.046
0.49979	0.98365	1.5277	2.0677	2.5905	3.0399	3.5345	4.1939	4.5863	5.0107	5.3894	6.0391	6.612	7.1952	7.4745	8.0157	8.435	9.0072	9.6488	10.093	10.474	10.928	11.445	11.961	12.616	12.845	12.899	13.423	13.906	14.769	15.366
0.50601	0.98365	1.5368	2.0731	2.5968	2.9985	3.5574	4.068	4.6223	5.0012	5.56	5.9645	6.578	7.1473	7.4622	8.0028	8.5824	8.9794	9.547	10.123	10.459	10.928	11.445	11.793	12.633	12.739	13.114	13.277	13.868	14.613	15.066
0.47558	1.0971	1.4962	2.0513	2.578	3.0538	3.5345	4.245	4.5863	4.9634	5.5297	6.0498	6.6347	7.3158	7.5361	7.8494	8.542	8.9794	9.6196	10.199	10.881	11.008	11.511	11.911	12.792	12.633	13.204	13.277	13.887	14.477	14.966
0.48353	1.0147	1.5414	2.0677	2.6602	3.0538	3.5117	4.1181	4.6494	5.0297	5.5195	6.0498	6.5554	7.0997	7.3644	8.0028	8.4884	8.9655	9.6488	10.184	10.661	10.928	11.511	12.114	12.669	12.686	13.259	13.441	14.075	14.887	15.085
0.49568	0.9905	1.5368	2.0731	2.6602	3.0677	3.5193	4.1013	4.5863	4.9917	5.5499	6.0927	6.6688	7.1473	7.4745	8.0286	8.5286	8.9516	9.6051	10.244	10.382	10.944	11.445	12.165	12.792	12.704	13.042	13.496	14.113	14.887	15.066
0.48755	0.97343	1.5097	2.0188	2.5717	3.0538	3.5269	4.1181	4.6133	4.9728	5.4692	6.0071	6.4544	7.1712	7.4991	8.0157	8.5689	8.9655	9.4029	10.336	10.443	11.072	11.577	12.046	12.828	12.792	13.042	13.441	14.113	14.633	15.145
0.5081	0.97343	1.5232	2.0896	2.6031	3.0538	3.565	4.1601	4.5595	4.954	5.4893	6.0284	6.4992	7.2192	7.4868	8.0028	8.542	9.049	9.5325	10.29	10.382	11.12	11.527	12.234	12.633	12.739	12.739	13.277	14.056	14.633	14.986
0.5081	1.0078	1.5735	2.0513	2.5654	3.0817	3.5804	4.0514	4.6584	4.9823	5.4192	6.0071	6.4767	7.1354	7.4745	7.9515	8.6229	8.8411	9.5325	10.214	10.428	11.056	11.544	12.251	12.563	12.739	13.096	13.478	13.981	14.691	14.789
0.4916	0.98707	1.5232	2.0458	2.5592	3.0538	3.5193	4.1013	4.5595	5.0012	5.4592	6.0605	6.4544	7.1116	7.4132	7.9515	8.6094	8.8824	9.3314	10.29	10.305	11.152	11.445	12.046	12.633	12.828	13.042	13.626	13.924	14.73	14.868
0.47165	1.0113	1.6014	2.1006	2.6094	3.0677	3.4589	4.1685	4.6494	5.0107	5.5905	5.9964	6.5329	7.2553	7.4499	8.1062	8.6229	8.9933	9.6196	10.244	10.49	11.249	11.494	12.046	12.528	12.721	12.97	13.496	13.943	14.458	14.986
0.49979	1.0008	1.5277	2.0786	2.5905	3.0817	3.4589	4.1433	4.5774	4.954	5.5297	6.125	6.5441	7.1832	7.4009	7.9387	8.475	9.091	9.6634	10.169	10.397	11.249	11.626	12.08	12.669	12.774	13.078	13.607	14.189	14.497	15.467
0.52079	0.97004	1.5142	2.035	2.5654	3.0817	3.4139	4.2878	4.5238	4.8977	5.5095	6.1575	6.5216	7.0759	7.4622	7.9387	8.4616	9.0072	9.4748	10.169	10.521	11.217	11.511	12.063	12.476	12.598	13.204	13.496	14.094	14.477	15.386
0.49568	0.9905	1.4962	2.035	2.5654	3.1097	3.565	3.9119	4.6313	5.0012	5.4994	6.2118	6.3765	7.0878	7.4745	8.1192	8.435	9.063	9.6342	10.199	10.29	11.12	11.527	12.114	12.459	12.774	13.024	13.405	13.812	14.362	15.185
0.49773	0.98707	1.4784	2.0677	2.5717	3.138	3.565	4.0763	4.5238	4.907	5.5297	6.0605	6.3987	7.2795	7.4499	7.9643	8.5959	9.091	9.576	10.26	10.536	11.056	11.494	12.029	12.234	12.881	12.828	13.204	14.113	14.228	15.671
0.52079	1.0043	1.5323	2.0951	2.5905	3.1027	3.5041	4.1097	4.6403	5.0297	5.5905	6.0284	6.4879	7.2674	7.4745	7.9515	8.5689	9.077	9.576	10.214	10.367	11.428	11.511	12.046	12.651	12.669	12.863	13.204	14.075	14.497	15.366
0.52079	0.9905	1.5597	2.1117	2.5905	3.1168	3.4664	4.1265	4.6947	5.0107	5.6007	6.1035	6.5667	7.2795	7.4254	8.0803	8.4216	9.105	9.6196	10.536	10.474	11.152	11.544	12.08	12.424	12.669	13.06	13.332	13.981	14.672	15.026
0.48353	0.99739	1.5277	2.0786	2.6221	3.1097	3.4739	4.1097	4.6494	5.0773	5.5195	6.0071	6.646	7.2433	7.4622	7.9387	8.4616	8.9933	9.678	10.138	10.521	11.072	11.56	12.012	12.528	12.704	13.096	13.441	14.113	14.613	15.085
0.47954	1.0147	1.5232	2.0622	2.6347	3.0817	3.5574	4.1349	4.5863	4.9917	5.5905	6.0605	6.5329	7.2553	7.4868	8.0157	8.4616	9.1331	9.6634	10.244	10.552	11.233	11.511	11.877	12.511	12.739	13.15	13.168	14.019	14.711	15.225
0.49568	1.0008	1.5459	2.0731	2.578	3.0747	3.4966	4.2109	4.6043	5.0582	5.6517	6.0071	6.5893	7.2072	7.4991	8.1582	8.5152	9.063	9.5325	10.214	10.676	11.185	11.544	12.114	12.581	12.845	13.096	13.552	14.019	14.691	15.366
0.51441	0.97004	1.5735	2.0567	2.6411	3.0747	3.4589	4.1433	4.6043	5.0392	5.6517	6.0391	6.5893	7.2312	7.623	8.0415	8.5555	8.9655	9.5905	10.26	10.567	10.96	11.593	12.046	12.372	12.828	13.096	13.589	14.151	14.633	15.326
0.49364	0.97683	1.5459	2.0188	2.6284	3.0817	3.5345	4.1349	4.5774	4.9823	5.56	6.0498	6.6233	7.2192	7.5238	8.0932	8.542	9.049	9.5905	10.108	10.598	10.676	11.577	12.012	12.389	12.792	13.024	13.46	14	14.594	15.165
0.49979	0.99394	1.5187	2.0951	2.5968	3.0677	3.5041	4.1349	4.6584	4.9728	5.5803	6.1035	6.578	7.2192	7.2553	7.9515	8.5286	9.2036	9.5905	10.321	10.428	10.976	11.544	12.217	12.493	12.863	13.06	13.386	14	14.516	15.306
0.47755	1.0113	1.5781	2.1173	2.6094	3.0677	3.4814	4.1013	4.6313	4.9823	5.56	6.0605	6.6347	7.1116	7.2795	7.8114	8.5286	8.9377	9.5905	10.199	10.629	11.072	11.544	12.148	12.441	12.774	13.114	13.386	14	14.497	14.947
0.48554	1.0008	1.5967	2.0841	2.6347	3.1097	3.5269	4.1013	4.5684	5.0012	5.5297	6.0605	6.4992	7.1832	7.4499	7.99	8.435	9.077	9.5615	10.26	10.49	10.96	11.379	12.097	12.406	12.774	13.132	13.607	14.113	14.711	15.145
0.48554	1.0008	1.5097	2.1228	2.5905	3.1238	3.4966	4.068	4.6947	4.9445	5.5702	6.0605	6.4544	7.1832	7.2553	7.99	8.5689	9.1895	9.547	10.397	10.428	11.008	11.577	12.097	12.406	12.863	13.132	13.332	13.887	14.828	15.306
0.48153	0.98024	1.5414	2.0896	2.5968	3.0887	3.5193	4.1601	4.7587	4.9823	5.56	6.1466	6.4879	7.2433	7.4499	8.0286	8.7179	9.063	9.5325	10.321	10.397	11.088	11.793	12.131	12.441	13.204	13.078	13.405	13.906	14.711	15.691
0.49568	0.98707	1.5277	2.1117	2.6284	3.1027	3.4814	4.245	4.6765	5.0297	5.5905	6.082	6.5216	7.2192	7.3887	8.0415	8.6364	9.091	9.4172	10.123	10.459	11.12	11.709	12.046	12.441	12.935	13.096	13.35	13.962	14.789	15.427
0.48554	1.0113	1.5368	2.0786	2.6411	3.0817	3.5574	4.0597	4.7221	5.0773	5.5499	6.0498	6.612	7.2072	7.3887	8.0673	8.6635	9.077	9.4316	10.244	10.521	10.912	11.643	12.234	12.476	12.863	13.259	13.241	13.849	14.672	15.185
0.4916	1.0078	1.5187	2.008	2.6157	3.0607	3.4364	4.1349	4.6584	5.0773	5.5398	6.1466	6.4992	7.1473	7.3644	8.0673	8.6771	9.1191	9.6342	10.154	10.443	11.12	11.593	12.148	12.476	12.917	13.204	13.313	13.849	14.555	15.467
0.49568	1.0043	1.5232	2.0841	2.6666	3.0538	3.6035	4.1349	4.6947	5.0965	5.5398	6.0712	6.5104	7.1354	7.4868	8.1192	8.6364	9.049	9.7073	10.108	10.505	11.249	11.445	12.251	12.372	12.952	13.132	13.441	13.887	14.789	15.185
0.50601	1.0078	1.5277	2.0731	2.6347	3.0538	3.5345	4.1265	4.5953	5.0107	5.5195	6.0498	6.5329	7.1712	7.4868	8.1452	8.6635	9.2319	9.4892	10.154	10.552	11.168	11.577	12.355	12.563	12.988	13.15	13.46	13.831	14.672	15.386
0.49568	0.99739	1.4739	2.0622	2.6031	3.033	3.4664	4.068	4.6856	4.9445	5.5905	6.0605	6.5667	6.9463	7.4499	7.9515	8.6635	9.1331	9.5181	10.169	10.49	11.185	11.911	12.063	12.633	12.792	13.132	13.204	13.962	14.633	14.966
0.4916	1.0113	1.5187	2.0513	2.5905	3.0399	3.5193	4.0846	4.6765	4.9917	5.6313	6.0498	6.5554	7.1712	7.4745	7.9643	8.6229	9.105	9.6196	10.214	10.413	11.024	11.445	12.012	12.476	12.721	13.186	13.386	13.962	14.458	15.066
0.47755	1.0008	1.5232	2.0242	2.6602	3.0122	3.5421	4.1013	4.6403	4.9728	5.5297	6.0177	6.6233	7.0641	7.4745	7.9259	8.5959	9.105	9.5325	10.169	10.474	11.04	11.396	12.148	12.493	12.774	12.899	13.35	14	14.516	15.245
0.47755	0.99394	1.5735	2.0458	2.6284	3.033	3.5041	4.1517	4.6223	4.9823	5.6723	5.9011	6.6574	7.0997	7.4622	7.9771	8.5152	9.1754	9.5036	10.169	10.397	11.04	11.445	12.046	12.32	12.81	13.096	13.478	14.037	14.4	15.046
0.48957	0.97683	1.5097	2.0622	2.5905	3.026	3.565	4.1433	4.6403	4.9164	5.4492	6.1142	6.646	7.1354	7.4499	7.99	8.4616	9.063	9.5181	10.003	10.382	10.912	11.527	12.046	12.389	12.935	13.006	13.737	14.094	14.381	15.326
0.4916	0.95656	1.5967	2.0458	2.5842	3.033	3.5421	4.0846	4.6494	4.9164	5.5499	6.0284	6.6233	7.2192	7.4991	8.0286	8.395	9.1191	9.5325	10.123	10.29	10.912	11.577	11.978	12.32	12.863	13.132	13.423	14.019	14.516	14.986
0.48957	0.99394	1.4917	2.0242	2.6157	3.033	3.4664	4.1601	4.5953	4.9258	5.56	5.9328	6.6006	7.1473	7.4868	8.0157	8.475	8.9933	9.5181	10.169	10.505	10.865	11.527	12.012	12.424	12.792	13.15	13.57	14.151	14.535	14.947
0.48554	1.0288	1.5187	1.9973	2.5905	3.0122	3.5269	4.177	4.5416	4.9728	5.4592	6.0177	6.5554	7.2433	7.4991	8.0673	8.4083	9.049	9.5181	10.305	10.443	10.96	11.759	12.012	12.389	12.792	13.132	13.386	14.17	14.633	14.966
0.47954	0.9905	1.4256	1.9919	2.5842	3.033	3.4966	4.1601	4.6403	4.9728	5.5297	5.9964	6.7375	7.0759	7.4622	8.0932	8.4083	9.091	9.5325	10.275	10.676	10.865	11.511	12.097	12.476	12.757	13.222	13.478	14.094	14.633	14.633
0.47361	1.0288	1.5828	2.0404	2.5343	3.0747	3.5345	4.177	4.6133	4.8977	5.5499	5.9433	6.6006	7.1952	7.4868	8.0803	8.435	9.0211	9.5325	10.154	10.692	10.865	11.643	12.097	12.406	12.774	13.441	13.259	14.094	14.613	14.848
0.47954	0.98365	1.5277	2.0458	2.5968	3.0817	3.4739	4.1433	4.5953	4.8325	5.5297	6.0071	6.646	7.2072	7.4254	8.1322	8.3552	8.9933	9.5036	10.093	10.49	11.04	11.593	12.029	12.337	12.828	13.277	13.423	13.906	14.574	15.205
0.47558	0.99394	1.5142	2.035	2.5905	3.0747	3.5193	4.1685	4.5774	4.9728	5.5095	6.0177	6.5893	7.0641	7.4622	8.1192	8.395	9.077	9.3886	10.169	10.474	11.185	11.577	11.995	12.234	12.651	13.368	13.405	13.981	14.75	15.487
0.47558	0.97683	1.5187	2.0513	2.6094	2.971	3.5193	4.1433	4.6133	4.9258	5.5803	6.0605	6.6574	7.2192	7.4254	8.0932	8.4083	8.9794	9.2744	10.108	10.583	11.104	11.544	12.046	12.029	12.669	13.241	13.222	13.868	14.633	15.386
0.49364	1.0008	1.4917	2.0896	2.578	3.1027	3.5421	4.1349	4.5774	4.9258	5.5905	5.9964	6.646	7.0878	7.4254	7.9771	8.435	8.9794	9.2887	10.048	10.474	11.104	11.577	12.012	12.046	12.633	13.132	13.368	13.924	14.769	14.907
0.48554	0.98365	1.5052	2.0513	2.5968	3.033	3.5421	4.0763	4.5505	4.9823	5.6211	5.9858	6.578	7.0759	7.4254	7.9387	8.435	8.9516	9.5036	10.123	10.583	10.992	11.593	11.995	12.251	12.686	13.15	13.35	13.981	14.73	14.947
0.48957	0.98707	1.5052	2.0951	2.5405	3.0468	3.5421	4.0514	4.6494	4.9352	5.6415	6.0498	6.6006	7.0997	7.5361	7.9131	8.5018	8.9655	9.4029	10.154	10.521	11.168	11.944	12.097	12.528	12.881	12.899	13.478	13.831	14.672	15.265
0.4916	0.99739	1.5459	2.0841	2.5717	3.033	3.5345	4.068	4.7221	4.954	5.6211	5.9751	6.5893	7.1832	7.4009	7.9515	8.4616	8.9655	9.4748	10.244	10.428	11.088	11.511	11.944	12.686	12.721	12.917	13.368	13.981	14.711	14.986
0.50186	0.97004	1.5142	2.0951	2.578	3.0399	3.5345	4.1181	4.6856	4.9634	5.5905	6.0391	6.5329	7.1712	7.4009	7.9387	8.5555	9.105	9.4604	10.305	10.49	11.104	11.61	11.995	12.704	12.828	13.042	13.496	13.943	14.73	15.306
0.49979	0.96328	1.5323	2.1507	2.673	3.0191	3.5193	4.1433	4.713	4.9823	5.56	6.125	6.5893	7.1116	7.3644	8.0286	8.395	9.077	9.547	10.336	10.521	10.881	11.511	11.995	12.616	13.042	13.259	13.386	14.056	14.691	15.145
0.50393	0.97683	1.5414	2.1228	2.6221	2.9779	3.5041	4.093	4.6133	4.9445	5.6211	6.0927	6.5893	7.1354	7.3765	8.1322	8.5689	9.0072	9.5615	10.214	10.521	10.912	11.61	11.944	12.598	12.757	13.096	13.46	13.962	14.672	15.165
0.5081	0.98024	1.5551	2.0896	2.6411	3.026	3.4664	4.1349	4.6947	5.0012	5.5398	6.1035	6.578	7.1593	7.2553	7.9643	8.6364	9.0072	9.576	10.108	10.583	11.056	11.494	11.995	12.511	12.686	13.06	13.57	14.17	14.613	15.145
0.5081	1.0113	1.5781	2.035	2.6031	3.0468	3.5041	4.1517	4.814	4.9445	5.6007	6.0284	6.5216	7.1952	7.3887	7.9643	8.5152	9.049	9.6342	10.229	10.676	11.152	11.659	11.978	12.424	12.616	13.096	13.496	14.113	14.613	15.085
0.50601	0.96328	1.4562	2.0296	2.6157	3.0747	3.4814	4.1097	4.7221	4.9823	5.5499	5.9539	6.5329	7.2312	7.3887	7.9771	8.6635	8.9794	9.6196	10.199	10.707	11.088	11.56	11.927	12.355	12.704	13.06	13.515	14.075	14.555	15.265
0.50393	0.9905	1.5459	2.0951	2.5592	3.0538	3.5574	4.177	4.6494	5.0012	5.5095	6.0605	6.5441	7.2674	7.4009	8.0028	8.5555	9.0211	9.6488	10.154	10.614	11.104	11.461	12.012	12.511	12.757	12.988	13.607	13.981	14.439	14.947
0.50186	0.99739	1.5007	2.0677	2.5905	3.0399	3.4814	4.177	4.6403	4.9728	5.6007	5.9645	6.5893	7.1473	7.4745	7.9003	8.5286	9.0351	9.6634	10.123	10.552	11.152	11.527	12.029	12.476	12.757	12.828	13.57	13.681	14.516	15.225
0.5102	0.98707	1.4739	2.0677	2.5905	2.9916	3.5345	4.2024	4.6584	5.0012	5.5297	6.0071	6.5329	7.1354	7.4991	7.7735	8.4884	8.9377	9.6926	10.063	10.598	11.185	11.643	12.114	12.651	12.774	13.024	13.478	13.756	14.555	14.809
0.5081	0.98024	1.4917	2.0513	2.6221	3.0957	3.5498	4.1685	4.6133	5.0678	5.4292	5.9964	6.3655	7.1473	7.6604	7.7608	8.435	8.9794	9.7219	10.063	10.552	10.976	11.577	12.268	12.686	12.899	13.024	13.35	13.774	14.362	15.225
0.49568	0.9905	1.5142	2.0513	2.6284	3.0538	3.5498	4.1433	4.5953	5.0202	5.6415	5.9328	6.6233	7.1116	7.6105	7.9515	8.5018	8.8963	9.6196	10.123	10.692	11.056	11.676	12.029	12.616	12.917	12.881	13.533	13.981	14.342	14.73
0.5102	0.9905	1.4873	2.0622	2.553	3.033	3.5345	4.2194	4.5774	4.954	5.4592	5.9645	6.5216	7.0759	7.5361	7.7105	8.4616	8.8274	9.5181	10.108	10.552	11.072	11.61	12.148	12.546	12.792	12.739	13.186	13.924	14.362	14.711
0.49773	0.9905	1.5142	2.035	2.6923	3.0053	3.5117	4.177	4.6223	5.0202	5.271	5.9645	6.5216	7.0523	7.4009	7.7735	8.4884	8.9101	9.6196	10.169	10.598	11.088	11.61	12.114	12.563	12.863	13.006	13.441	13.774	14.497	15.105
0.47558	0.98024	1.5232	2.0404	2.6794	2.9573	3.5117	4.2194	4.6765	5.0202	5.7031	5.9539	6.578	7.1235	7.3158	7.9131	8.4616	8.9239	9.576	10.093	10.505	11.104	11.56	12.337	12.528	12.493	12.988	13.295	13.793	14.574	15.165
0.49979	0.98365	1.5368	2.0677	2.6347	3.033	3.5117	4.2109	4.6133	4.9728	5.6109	5.9751	6.5554	7.1712	7.4254	7.9259	8.4216	8.8963	9.5325	10.154	10.629	10.928	11.56	12.234	12.493	12.935	13.114	13.478	13.849	14.73	14.986
0.49568	1.0043	1.5323	2.0404	2.6411	3.0191	3.489	4.1433	4.5774	4.8883	5.6313	5.9539	6.4767	7.2312	7.3522	7.9771	8.435	8.9655	9.5905	10.169	10.552	11.104	11.494	12.372	12.563	12.828	12.651	13.423	13.868	14.439	15.026
0.49979	0.99739	1.5459	2.0404	2.6284	2.9847	3.5117	4.1097	4.6313	5.0487	5.5398	6.0177	6.5554	7.1952	7.3522	7.9515	8.4083	9.0072	9.5181	10.229	10.583	10.928	11.544	12.114	12.476	12.669	13.096	13.423	13.812	14.439	15.306
0.5081	1.0043	1.5551	2.035	2.6031	2.9985	3.5041	4.1349	4.6856	4.9823	5.7859	6.0284	6.5216	7.2433	7.3887	8.1062	8.4216	8.9933	9.5181	10.018	10.351	11.088	11.544	12.097	12.493	12.704	12.899	13.478	13.887	14.439	15.285
0.49568	1.0113	1.5921	2.0404	2.6031	3.0747	3.5498	4.0514	4.6223	5.0012	5.5803	6.0498	6.578	7.2312	7.4376	7.9643	8.7316	8.9794	9.5325	9.9883	10.367	11.152	11.445	12.2	12.441	12.616	13.204	13.313	13.981	14.535	15.711
0.49364	1.0078	1.5232	2.0404	2.5968	3.0399	3.5881	4.093	4.6223	4.9634	5.4994	6.1142	6.5667	7.2915	7.4254	7.99	8.65	8.9933	9.576	10.123	10.336	11.152	11.61	12.182	12.441	12.899	12.952	13.496	14.17	14.691	14.887
0.4916	0.99739	1.4917	2.0513	2.578	3.0747	3.5804	4.0597	4.6133	4.9728	5.5398	6.1791	6.4879	7.2072	7.4376	7.8876	8.5959	9.077	9.5036	10.305	10.521	11.136	11.527	12.114	12.372	12.757	13.024	13.515	14.037	14.848	14.907
0.49773	0.98024	1.5505	2.1006	2.5905	3.0538	3.565	3.9363	4.6043	5.0012	5.5195	6.19	6.4879	7.1116	7.34	7.9771	8.7452	9.049	9.3886	10.244	10.552	11.185	11.511	12.114	12.476	12.633	13.042	13.552	13.906	14.73	15.386
0.5081	1.0043	1.5781	2.1284	2.5842	3.033	3.5421	4.1601	4.6043	4.9352	5.5398	6.0605	6.4209	7.2312	7.4376	7.9643	8.6771	9.105	9.446	10.26	10.367	11.136	11.544	12.063	12.459	12.863	13.006	13.496	13.887	14.594	15.145
0.47954	1.0008	1.5232	2.1006	2.578	3.033	3.5345	4.1181	4.5505	4.9917	5.5095	6.082	6.5667	7.2312	7.34	8.0028	8.6907	8.8549	9.547	10.199	10.521	11.217	11.511	11.776	12.581	12.792	12.899	13.496	13.943	14.555	15.326
0.50601	1.0008	1.5459	2.035	2.6031	3.0538	3.5345	4.093	4.5327	5.1061	5.6211	6.0712	6.6233	7.3037	7.3037	8.0544	8.5959	8.9377	9.4604	10.26	10.567	11.056	11.445	11.86	12.669	12.581	12.952	13.515	13.906	14.633	15.306
0.48554	1.0008	1.5414	2.0677	2.578	3.026	3.5421	4.1265	4.5595	5.0107	5.5297	6.082	6.6006	7.2795	7.3158	7.99	8.5689	9.0351	9.4748	10.063	10.505	11.072	11.379	11.944	12.285	12.598	13.06	13.589	13.981	14.613	15.085
0.48353	1.0043	1.5142	2.1117	2.6094	3.0053	3.5193	4.1939	4.5061	5.0487	5.5702	6.0605	6.612	7.4499	7.4745	7.9643	8.5959	9.2887	9.4748	10.138	10.49	10.928	11.577	11.826	12.441	12.739	12.935	13.57	14.208	14.555	15.753
0.48957	0.9905	1.5187	2.0951	2.553	3.0607	3.5117	4.1433	4.5505	4.954	5.5095	6.125	6.646	7.34	7.4499	8.0286	8.5555	9.1331	9.5325	10.214	10.629	10.881	11.593	11.793	12.511	12.774	13.132	13.756	14.056	14.535	15.306
0.49979	0.99394	1.5097	2.0786	2.6094	3.0677	3.5117	4.1013	4.4972	4.9917	5.4692	6.0498	6.6233	7.2553	7.5114	8.0415	8.6094	8.9933	9.6488	10.108	10.536	10.928	11.511	11.927	12.268	12.81	12.988	13.441	13.924	14.535	14.848
0.4916	0.96328	1.4962	2.0731	2.5968	2.9847	3.5041	4.1939	4.5953	5.0297	5.5095	5.9964	6.5329	7.3037	7.4376	7.9771	8.6907	9.1472	9.6051	10.184	10.552	10.897	11.659	11.877	12.721	12.881	13.06	13.332	13.943	14.574	15.085
0.47361	1.0113	1.5187	2.0567	2.6475	2.9642	3.489	4.1601	4.5953	4.9728	5.5702	6.0391	6.4544	7.4009	7.4376	8.0028	8.7043	9.2177	9.678	10.275	10.474	10.912	11.56	11.978	12.355	12.917	12.952	13.57	13.981	14.691	15.569
0.4916	0.96666	1.4917	2.0458	2.553	3.0817	3.4438	4.2024	4.3569	5.0012	5.4392	6.0071	6.646	7.3279	7.4622	7.9771	8.5689	9.2744	9.678	10.29	10.443	11.056	11.643	11.894	12.459	12.863	12.863	13.441	13.962	14.691	15.245
0.48153	1.0182	1.4828	2.0896	2.6538	3.0468	3.489	4.2194	4.5327	4.9634	5.4492	5.9433	6.853	7.34	7.4254	7.9771	8.5555	9.091	9.5905	10.018	10.629	11.104	11.643	11.944	12.32	12.828	13.042	13.496	13.924	14.672	14.986
0.50186	1.0536	1.5097	2.0677	2.6094	3.0747	3.5193	4.1685	4.6223	5.0202	5.4692	5.9011	6.6347	7.2915	7.4622	7.9131	8.5152	9.063	9.6051	10.018	10.583	11.265	11.577	11.911	12.546	12.686	13.024	13.313	13.962	14.75	15.548
0.47361	1.0358	1.5459	2.0296	2.5717	3.0957	3.4438	4.1433	4.6403	4.9445	5.5195	5.9011	6.6688	7.2312	7.4376	8.0157	8.5824	8.9933	9.6196	10.123	10.645	10.96	11.56	12.046	12.581	12.881	13.06	13.35	13.868	14.809	14.711
0.47361	0.93326	1.5007	2.0567	2.6347	3.0817	3.4513	4.1517	4.5863	4.954	5.6313	5.9645	6.646	7.2795	7.4376	7.9643	8.6229	9.1191	9.5181	10.29	10.661	11.233	11.593	11.927	12.528	12.845	12.988	13.386	13.812	14.516	15.508
0.52293	0.98707	1.4784	2.0513	2.5842	3.0957	3.4664	4.1601	4.6313	4.9917	5.4692	5.9539	6.646	7.2433	7.3644	7.9515	8.5152	8.8963	9.5615	10.093	10.552	11.347	11.593	12.046	12.528	12.828	12.988	13.589	13.924	14.535	15.145
0.52939	0.97343	1.4962	2.0896	2.5905	3.0468	3.4664	4.1517	4.6494	4.9728	5.4893	5.9964	6.612	7.2674	7.5114	7.9259	8.6635	8.9101	9.7954	10.123	10.567	11.445	11.527	11.978	12.355	12.757	13.024	13.515	13.962	14.594	14.868
0.52079	0.9432	1.5052	2.0731	2.6031	3.0677	3.4739	4.1433	4.5863	5.0202	5.5499	5.9539	6.6006	7.1952	7.4622	8.0673	8.6229	9.1191	9.6634	10.063	10.521	11.233	11.659	11.927	12.32	12.828	13.096	13.496	13.756	14.711	15.285
0.48957	1.0358	1.4739	2.0951	2.5968	3.0607	3.5041	4.1517	4.6133	4.9445	5.6211	5.9433	6.5441	7.1116	7.3644	8.0932	8.542	9.1895	9.4172	10.275	10.536	11.136	11.643	12.2	12.337	12.845	12.988	13.681	14.019	14.594	15.205
0.48554	0.99739	1.5187	2.0841	2.5592	3.0468	3.4966	4.2024	4.6133	4.907	5.5195	5.9858	6.5104	7.1952	7.3037	7.9003	8.6094	9.2036	9.4029	10.367	10.521	11.396	11.709	12.2	12.528	12.917	12.917	13.496	13.887	14.633	14.594
0.48554	0.99394	1.5323	2.0567	2.6031	3.0399	3.4966	4.2792	4.5595	4.9728	5.5398	5.8906	6.5216	7.1473	7.4254	7.99	8.5689	8.9655	9.5905	10.321	10.49	11.168	11.527	12.097	12.32	12.97	13.15	13.35	13.924	14.228	15.185
0.49979	0.9905	1.5368	1.9919	2.578	3.0887	3.4664	4.1685	4.6403	4.9917	5.5195	5.9645	6.612	7.1832	7.34	7.9515	8.6907	8.9377	9.5905	10.26	10.536	11.136	11.412	12.251	12.424	12.899	12.757	13.626	13.943	14.555	14.613
0.49568	1.0113	1.5097	2.0677	2.578	3.0538	3.4739	4.0846	4.6043	4.9917	5.5499	6.0284	6.5554	7.2072	7.3522	7.9131	8.5286	9.063	9.5905	10.428	10.428	10.976	11.693	12.08	12.633	12.97	13.132	13.663	13.943	14.516	15.026
0.49568	0.98365	1.5052	2.0513	2.578	3.0607	3.5041	4.2109	4.6043	4.9728	5.4592	5.9222	6.6233	7.2192	7.4499	8.1062	8.542	9.1191	9.6342	10.214	10.521	11.12	11.56	11.995	12.459	12.935	13.222	13.644	13.943	14.633	14.947
0.5081	0.98024	1.4828	2.0513	2.5281	3.0817	3.4814	4.2024	4.6043	4.8977	5.662	5.9751	6.578	7.2433	7.4499	7.9003	8.4083	9.1472	9.3599	10.184	10.428	11.04	11.478	12.046	12.441	12.952	13.078	13.644	13.906	14.789	15.427
0.49773	0.99394	1.4739	2.0951	2.5219	3.0468	3.4513	4.1097	4.6947	4.9634	5.5095	5.9222	6.5554	7.1235	7.4868	8.0932	8.4083	9.049	9.6926	10.154	10.521	11.04	11.527	12.063	12.511	13.132	13.15	13.515	14.019	14.555	14.907
0.49773	0.99739	1.4828	2.0622	2.5654	3.1168	3.4513	4.1855	4.5505	5.0012	5.6109	6.0712	6.4098	7.1832	7.3522	7.9771	8.342	9.105	9.6342	10.214	10.521	11.04	11.527	12.097	12.389	12.686	13.06	13.57	13.906	14.652	15.285
0.5081	0.99739	1.5277	2.0896	2.5592	3.0747	3.5881	4.093	4.5505	4.9164	5.5297	5.9964	6.5554	7.2795	7.5114	7.8494	8.5286	8.9933	9.446	10.199	10.505	11.008	11.709	12.046	12.424	12.81	13.006	13.478	13.981	14.439	14.907
0.48755	0.98365	1.4873	2.0841	2.6284	3.1097	3.5421	4.1685	4.6133	4.8418	5.4893	6.0284	6.5441	7.2072	7.4991	7.8876	8.542	9.1331	9.576	10.428	10.443	11.008	11.709	12.08	12.441	12.739	12.952	13.478	13.924	14.848	14.887
0.49364	1.068	1.5052	2.0896	2.5842	3.138	3.5574	4.1013	4.5684	5.0012	5.4692	6.0071	6.5441	7.2915	7.4868	7.9387	8.5152	9.1331	9.576	10.382	10.336	10.897	11.743	12.097	12.459	12.845	12.899	13.441	14.056	14.711	15.366
0.49979	0.98707	1.5097	2.0677	2.5842	3.0747	3.7045	4.0763	4.5595	4.9258	5.4592	5.9964	6.5893	7.2915	7.4499	8.0028	8.475	9.091	9.6926	10.244	10.536	10.897	11.709	12.012	12.511	12.721	12.97	13.533	13.868	14.73	15.006
0.49364	0.97683	1.5459	2.0677	2.5842	3.0817	3.6654	4.2024	4.6223	5.0202	5.4893	5.9328	6.5441	7.34	7.4622	8.2235	8.5689	9.1472	9.6196	10.214	10.552	10.865	11.759	12.063	12.546	12.863	12.952	13.589	13.774	14.574	14.966
0.48353	0.98707	1.4917	2.1173	2.578	3.1168	3.5881	4.0846	4.5774	4.9728	5.3993	5.9116	6.6233	7.1473	7.4132	7.9131	8.4483	9.1191	9.6051	10.229	10.521	10.754	11.944	11.843	12.528	12.845	13.024	13.644	13.887	14.574	14.986
0.52508	1.0182	1.5187	2.0786	2.578	3.1027	3.5498	4.1517	4.5774	4.9823	5.3894	5.9328	6.6688	7.0997	7.4254	7.8621	8.5018	9.0072	9.6926	10.336	10.645	10.802	12.012	11.961	12.511	12.828	13.06	13.681	14.056	14.555	14.927
0.49364	0.98365	1.5551	2.0567	2.6031	3.0957	3.5574	4.1601	4.4972	4.9352	5.4392	5.9433	6.578	7.2192	7.4376	8.0157	8.5286	9.0351	9.6196	10.138	10.552	10.865	11.843	12.097	12.476	12.881	12.97	13.644	13.943	14.439	15.447
0.49364	0.99394	1.5551	2.0567	2.5592	3.1027	3.5269	4.1265	4.5416	4.8883	5.4893	5.9964	6.612	7.2192	7.4132	8.0415	8.3156	8.9516	9.4892	10.199	10.413	10.865	11.693	12.303	12.528	12.863	13.114	13.423	13.924	14.711	15.205
0.49364	0.97004	1.5368	2.0513	2.5905	3.0538	3.5117	4.1685	4.5953	4.879	5.4793	5.9751	6.6233	7.1832	7.698	7.9643	8.4216	9.049	9.6342	10.26	10.583	11.072	11.709	11.995	12.528	12.845	13.259	13.607	13.924	14.828	15.589
0.49773	0.9905	1.4962	2.0731	2.5281	3.033	3.5117	4.2109	4.5863	4.9445	5.4192	6.0284	6.646	7.3158	7.4132	8.0028	8.3818	9.1613	9.6488	10.138	10.474	11.072	11.643	12.114	12.616	13.15	13.241	13.515	13.737	14.672	15.406
0.4916	0.9905	1.5505	2.0731	2.5096	3.0538	3.5041	4.068	4.5953	4.9352	5.4592	6.0391	6.6233	7.1832	7.4622	8.0803	8.5555	9.1472	9.6634	10.123	10.474	11.136	11.61	11.826	12.598	12.917	13.168	13.57	13.774	14.652	15.326
0.49568	0.96328	1.5323	2.0404	2.5842	2.9985	3.489	4.1349	4.5953	4.907	5.5398	6.0071	6.612	7.2312	7.4376	8.0028	8.4884	8.9933	9.576	10.033	10.49	10.96	11.676	11.911	12.563	13.042	13.042	13.533	14.497	14.613	15.066
0.49568	0.99739	1.4828	2.0896	2.6347	3.033	3.5269	4.1517	4.5238	4.7955	5.5095	6.0605	6.7146	7.3037	7.4009	8.0157	8.5555	8.9933	9.6342	10.108	10.521	11.04	11.709	12.097	12.389	12.792	13.042	13.552	13.868	14.73	15.265
0.50186	0.99394	1.4083	2.0513	2.6094	2.9916	3.5498	4.2621	4.4883	4.9445	5.56	5.9858	6.6233	7.3279	7.3765	8.0415	8.5018	8.9655	9.4604	10.063	10.413	10.944	11.676	12.131	12.476	12.633	13.096	13.405	14.019	14.672	15.326
0.49773	0.9905	1.5459	2.0622	2.6987	3.0053	3.4589	4.1685	4.5863	4.9164	5.6313	6.0927	6.6233	7.1473	7.3765	7.99	8.5689	9.063	9.5181	10.033	10.598	11.072	11.659	12.097	12.424	12.899	13.186	13.626	13.831	14.672	15.125
0.47361	0.98024	1.5007	2.0567	2.6221	3.026	3.5421	4.1601	4.6133	4.9634	5.56	6.0498	6.6347	7.3158	7.4009	8.0544	8.5555	9.049	9.6342	10.048	10.536	11.008	11.659	12.046	12.651	13.006	13.313	13.533	13.962	14.574	15.245
0.49364	0.98024	1.5277	2.0513	2.5717	2.9234	3.5421	4.1349	4.6133	4.9258	5.4793	6.0284	6.5554	7.2192	7.4254	8.0673	8.5152	8.9933	9.5325	10.138	10.382	10.944	11.577	12.131	12.581	12.899	13.295	13.496	13.906	14.477	15.125
0.48755	0.9905	1.5323	2.0786	2.5905	2.971	3.5269	4.1939	4.6223	4.879	5.4793	5.9011	6.3765	7.2674	7.4499	7.99	8.5689	8.9794	9.446	10.154	10.413	11.168	11.743	12.097	12.828	12.952	13.078	13.496	13.793	14.535	15.165
0.50393	1.0043	1.5277	2.0622	2.6538	3.0399	3.6189	4.2194	4.6856	4.9352	5.4392	6.0391	6.5554	7.3037	7.4868	8.0932	8.542	8.9933	9.5615	10.29	10.428	11.088	11.81	12.063	12.651	12.863	13.132	13.368	14	14.535	15.609
0.49979	0.99739	1.5505	2.1117	2.6347	3.0468	3.5574	4.1433	4.6223	4.8511	5.4592	6.0712	6.5667	7.2553	7.5114	8.0286	8.542	9.091	9.5325	10.26	10.536	11.233	11.643	12.012	12.511	12.792	12.988	13.607	13.812	14.497	15.285
0.48957	0.97683	1.5368	2.0896	2.6031	3.0053	3.5193	4.0763	4.6494	4.8697	5.4692	6.0927	6.4767	7.2072	7.3279	8.1974	8.4083	9.091	9.446	10.305	10.505	11.008	11.577	12.029	12.598	12.881	13.204	13.644	13.906	14.691	15.125
0.48554	0.9905	1.5232	2.0951	2.5968	2.9985	3.5117	4.1685	4.6133	4.8511	5.4492	5.9116	6.5104	6.9933	7.3644	8.0544	8.5286	9.077	9.547	10.305	10.505	11.056	11.61	11.843	12.441	12.899	13.096	13.313	13.924	14.535	15.085
0.47755	0.9905	1.5232	2.1284	2.578	3.0122	3.5193	4.1601	4.7495	4.9164	5.4692	6.125	6.6006	7.1593	7.3887	8.0286	8.3685	9.0351	9.7366	10.336	10.459	10.897	11.494	11.911	12.389	13.024	12.828	13.46	14.037	14.711	15.386
0.47954	1.0043	1.4784	2.0951	2.4728	3.0538	3.6189	4.1601	4.5774	4.9917	5.56	6.0177	6.5554	7.2192	7.4991	8.1843	8.3818	9.0351	9.547	10.26	10.521	11.008	11.626	12.046	12.424	12.935	12.988	13.607	13.887	14.633	15.285
0.5102	0.97343	1.5277	2.0896	2.5717	3.0747	3.5804	4.1517	4.6765	5.0107	5.5803	5.9751	6.578	7.1712	7.4254	8.0932	8.5152	8.9101	9.5615	10.305	10.443	10.992	11.81	11.978	12.476	12.917	12.863	13.626	13.681	14.613	15.346
0.48554	1.0113	1.5277	2.0622	2.6602	3.1238	3.5269	4.1517	4.5863	4.9917	5.5398	6.0071	6.5216	7.1952	7.4009	8.0415	8.4616	8.9377	9.4892	10.199	10.552	11.04	11.743	12.148	12.616	12.721	12.935	13.46	13.737	14.477	15.066
0.50186	1.0113	1.5551	2.0677	2.5968	3.0468	3.5193	4.0431	4.5505	5.0012	5.5195	6.1142	6.5441	7.2553	7.4745	8.0803	8.3818	8.9655	9.6342	10.169	10.428	10.928	11.626	11.995	12.389	12.598	13.06	13.204	13.793	14.574	15.046
0.50393	1.0008	1.4607	2.0404	2.6347	3.0399	3.4513	4.1433	4.5774	4.9823	5.5803	6.082	6.4656	7.2072	7.5981	8.0803	8.2366	8.9377	9.5615	10.123	10.474	11.12	11.643	11.843	12.459	12.739	12.952	13.515	13.812	14.497	15.145
0.49979	1.0008	1.5052	2.0951	2.6221	3.1097	3.5193	4.1265	4.6043	4.9352	5.5095	5.9858	6.5893	7.1832	7.4745	8.0157	8.3156	8.8824	9.4316	10.108	10.443	10.976	11.693	11.894	12.389	12.757	12.917	13.515	14.075	14.516	15.265
0.4916	1.0147	1.5187	2.0567	2.6221	3.0817	3.4589	4.2535	4.6675	4.9634	5.6211	6.3765	6.578	7.1832	7.4254	7.9259	8.3024	8.9794	9.4029	10.093	10.397	11.088	11.676	12.012	12.476	12.739	12.881	13.681	13.868	14.594	15.185
0.48353	0.98365	1.5187	2.1228	2.5968	3.0677	3.5193	4.1601	4.7312	4.9634	5.6007	5.9328	6.5667	7.1832	7.5609	7.8494	8.3156	9.0072	9.6196	10.138	10.428	11.217	11.593	12.063	12.406	12.935	12.917	13.626	13.756	14.73	15.225
0.4916	1.0113	1.5142	2.1228	2.6602	3.0817	3.5421	4.2024	4.6223	4.954	5.5702	6.0605	6.5893	7.0878	7.4745	8.0286	8.4483	8.8687	9.4172	10.169	10.567	10.928	11.626	12.148	12.511	12.81	12.917	13.515	14.056	14.672	15.125
0.48755	0.99394	1.5459	2.0951	2.6666	3.0538	3.5269	4.1601	4.713	4.9445	5.4793	6.0498	6.4992	7.2192	7.4499	7.9387	8.4483	9.0072	9.5181	10.123	10.443	11.04	11.593	11.894	12.563	12.863	12.988	13.241	13.887	14.516	15.245
0.49364	0.99394	1.5142	2.1006	2.5968	3.0957	3.4513	3.8957	4.6584	4.9634	5.4093	6.0071	6.7146	7.1712	7.5238	8.0673	8.4216	9.0351	9.4892	10.169	10.351	11.088	11.676	12.268	12.616	12.757	12.97	13.533	14.019	14.633	15.185
0.50393	0.97343	1.5187	2.0786	2.553	3.0747	3.489	4.1181	4.6223	4.9258	5.4692	6.0927	6.7146	7.1712	7.4376	8.0415	8.6094	9.0211	9.5181	10.229	10.459	11.185	11.61	12.063	12.757	12.651	13.006	13.46	14	14.477	15.145
0.47954	0.96666	1.5007	2.0731	2.5654	3.0817	3.5498	4.0183	4.6223	4.9164	5.4893	6.0284	6.7031	7.1473	7.4745	7.9771	8.5689	8.9933	9.5036	10.305	10.443	10.833	11.461	11.995	12.669	12.792	13.024	13.533	14.037	14.497	14.947
0.49773	0.99739	1.5414	2.0896	2.5905	3.0468	3.5041	4.1265	4.6133	4.9917	5.5499	6.0071	6.6917	7.1593	7.5361	7.824	8.6229	8.9239	9.4748	10.169	10.275	10.992	11.527	11.877	12.581	12.828	13.132	13.719	13.906	14.613	15.026
0.51441	0.98707	1.5323	2.0622	2.6221	3.026	3.489	4.1349	4.6043	5.0107	5.4492	6.0498	6.6917	7.1116	7.4376	7.99	8.7179	8.9377	9.5615	10.443	10.474	10.992	11.693	11.726	12.441	12.598	13.204	13.533	13.981	14.439	15.205
0.50186	0.99739	1.5142	2.0458	2.5717	3.0399	3.489	4.1097	4.4619	4.879	5.4893	5.9539	6.5104	7.0523	7.6479	7.99	8.6364	8.8274	9.5615	10.199	10.382	11.04	11.428	11.86	12.337	12.774	13.024	13.496	13.981	14.594	15.245
0.49568	1.0113	1.4828	2.0513	2.6157	3.0122	3.4289	4.1685	4.5595	4.9164	5.4692	5.9964	6.612	7.2795	7.5238	8.0028	8.4616	9.2319	9.6342	10.078	10.49	10.976	11.61	11.944	12.372	12.81	13.295	13.7	14.037	14.535	15.125
0.48957	1.0008	1.5323	2.1062	2.6031	2.9847	3.5193	4.1349	4.6133	4.954	5.4692	5.9645	6.5216	7.0759	7.4868	8.0544	8.6094	8.9655	9.6051	10.154	10.49	10.976	11.478	11.743	12.476	12.845	12.899	13.589	14.151	14.613	15.085
0.49364	0.99394	1.5232	2.0896	2.578	3.0053	3.5345	4.1433	4.5327	4.9352	5.5398	5.9964	6.5441	7.1712	7.5733	8.0157	8.5959	9.077	9.6926	10.214	10.521	11.008	11.759	11.86	12.285	12.845	13.042	13.368	13.962	14.711	15.265
0.48957	1.0182	1.4607	2.0731	2.6221	3.0607	3.5345	4.1855	4.5774	5.0487	5.5499	5.9964	6.5441	7.0997	7.5238	8.1062	8.5959	8.9516	9.4748	10.229	10.428	11.168	11.676	11.978	12.511	12.476	13.132	13.35	14.019	14.672	15.285
0.48554	1.0217	1.5323	2.0458	2.6602	3.0053	3.5881	4.1349	4.5684	4.9634	5.5297	5.9858	6.5441	7.1832	7.4254	8.1322	8.6094	8.9655	9.5615	10.229	10.645	10.912	11.826	12.097	12.337	12.616	13.168	13.423	14.266	14.574	14.986
0.48554	1.0008	1.5828	2.0622	2.6157	3.0957	3.4966	4.1601	4.5327	4.9728	5.5398	6.0605	6.5441	7.2072	7.5485	8.1452	8.6094	8.9239	9.7219	10.26	10.583	10.912	11.577	11.978	12.234	12.792	13.042	13.441	14.056	14.633	15.105
0.48755	1.0008	1.5007	2.0458	2.6157	3.0399	3.4438	4.1433	4.5953	4.9823	5.5095	5.9858	6.578	7.2312	7.5238	8.1192	8.6094	9.0072	9.7073	10.229	10.459	10.976	11.659	11.961	12.372	12.757	13.06	13.405	13.924	14.594	14.986
0.48755	0.99394	1.4828	2.0296	2.6221	2.9985	3.4814	4.1265	4.5774	4.9728	5.5398	6.0391	6.612	7.2553	7.4745	8.1452	8.5555	9.0072	9.678	10.26	10.598	11.008	11.643	11.995	12.459	12.863	12.97	13.57	14.151	14.613	15.105
0.49773	0.9905	1.5551	2.0404	2.6157	3.0122	3.5574	4.1265	4.4883	5.0012	5.4692	6.0177	6.6574	7.1235	7.4499	7.99	8.5824	8.9933	9.6342	10.229	10.413	11.04	11.676	12.097	12.406	12.757	12.739	13.552	14.056	14.458	15.346
0.48554	0.98707	1.5187	2.0513	2.5905	3.0468	3.5498	4.0763	4.5863	4.9728	5.3993	6.0927	6.646	7.1832	7.4622	8.0286	8.6229	8.9933	9.6926	10.199	10.505	11.072	11.511	12.131	12.511	12.845	13.078	13.515	14.132	14.458	15.085
0.50186	1.0113	1.5505	2.0622	2.6221	3.1238	3.6421	4.1939	4.6133	4.954	5.5499	6.125	6.6688	7.2192	7.4132	8.0028	8.6907	9.0351	9.6926	10.154	10.536	11.04	11.511	12.182	12.528	12.881	13.006	13.626	14.132	14.458	14.809
0.49568	1.0008	1.5414	2.0188	2.5592	3.0957	3.6654	4.0846	4.6947	4.9258	5.5499	6.0284	6.8066	7.2072	7.3887	8.0286	8.7999	9.1895	9.678	10.199	10.536	10.849	11.527	12.114	12.616	12.651	13.078	13.405	13.868	14.594	15.026
0.50601	1.0078	1.5505	2.0404	2.6031	3.0677	3.4814	4.093	4.6494	4.954	5.5297	6.1358	6.8414	7.1832	7.34	8.0286	8.6364	9.2602	9.6926	10.214	10.49	11.233	11.643	12.148	12.598	12.686	13.186	13.46	13.793	14.574	15.105
0.49773	0.99394	1.5505	2.0404	2.5905	3.1027	3.5957	4.177	4.6584	5.0107	5.4692	6.0498	6.853	7.2072	7.3037	7.9515	8.7043	9.3171	9.6634	10.154	10.505	11.104	11.793	12.063	12.563	12.845	13.096	13.386	13.943	14.789	14.947
0.48957	1.0078	1.5323	2.0513	2.6031	3.0607	3.5041	4.1349	4.6765	5.0012	5.4893	6.1142	6.8414	7.2072	7.4009	7.9771	8.7316	9.2319	9.547	10.336	10.443	10.897	11.743	12.046	12.476	13.241	13.259	13.386	13.887	14.848	15.026
0.47755	1.0043	1.4873	2.0896	2.6347	3.0468	3.4739	4.1601	4.5863	4.9728	5.5195	6.0391	6.6574	7.1354	7.5238	7.9003	8.7316	9.077	9.446	10.305	10.474	11.249	11.61	11.978	12.563	12.757	12.774	13.478	14.019	14.594	15.026
0.50601	0.99739	1.5187	2.1062	2.5592	3.0399	3.4966	4.1685	4.4619	4.9823	5.5499	5.9645	6.612	7.0997	7.3887	7.8876	8.7043	9.1331	9.547	10.26	10.428	11.282	11.544	11.86	12.511	12.669	13.024	13.533	13.849	14.477	15.066
0.49364	1.0008	1.5007	2.0896	2.6157	3.026	3.4214	4.1685	4.6133	4.9917	5.5095	6.0712	6.646	7.1473	7.3644	7.8621	8.6771	9.0351	9.5325	10.199	10.367	11.088	11.693	11.81	12.511	12.792	13.024	13.515	13.943	14.458	15.185
0.47558	0.9905	1.5142	2.0786	2.6475	3.0191	3.4589	4.1433	4.5953	4.9352	5.5195	5.9858	6.5667	7.1952	7.4499	7.8494	8.65	8.9516	9.5615	10.123	10.367	11.024	11.659	11.168	12.389	12.651	13.114	13.644	13.887	14.477	15.165
0.49979	0.95991	1.5052	2.1173	2.6411	3.0677	3.5269	4.1265	4.6133	4.9634	5.4592	6.0071	6.5893	7.2312	7.4009	7.8494	8.6771	9.063	9.3886	10.108	10.305	11.04	11.643	12.046	12.389	12.828	13.024	13.478	13.831	14.574	15.165
0.46387	0.98365	1.5187	2.0896	2.5842	3.0887	3.489	4.1517	4.6584	4.9728	5.5702	6.0177	6.5893	7.1593	7.3765	7.8876	8.5689	9.105	9.4748	10.199	10.321	11.056	11.363	11.978	12.372	12.546	13.114	13.496	13.793	14.594	15.326
0.47954	0.98365	1.5277	2.1062	2.578	3.0817	3.4966	4.1349	4.6043	4.9823	5.5905	6.0071	6.6006	7.1832	7.3887	7.99	8.542	9.105	9.446	10.199	10.351	11.152	11.676	11.978	12.441	12.774	13.096	13.552	13.831	14.652	15.245
0.50186	0.98024	1.5277	2.0951	2.5592	2.9166	3.4966	4.093	4.6223	4.9728	5.4292	6.0177	6.6233	7.1952	7.4254	7.8494	8.5018	9.077	9.576	10.018	10.397	11.217	11.776	11.927	12.441	12.81	13.096	13.35	13.887	14.652	15.185
0.47755	0.98707	1.5368	2.0841	2.578	3.0677	3.4364	4.1013	4.6223	4.9258	5.5297	6.0284	6.5441	7.1952	7.4499	7.9131	8.6364	9.0072	9.5615	10.108	10.505	11.168	11.81	12.046	12.355	12.563	13.042	13.441	13.981	14.809	15.205
0.4658	1.0078	1.5459	2.0404	2.5968	3.0607	3.4966	4.1097	4.6043	4.8977	5.4893	6.1035	6.5329	7.1235	7.4868	7.9643	8.4216	8.9933	9.4604	10.063	10.786	11.217	11.726	11.978	12.424	12.739	13.15	13.46	13.962	14.652	15.326
0.49979	1.0113	1.6014	2.0786	2.6538	3.033	3.4438	4.1517	4.5416	4.9258	5.5499	6.082	6.4098	7.2192	7.4009	7.9259	8.4083	9.1191	9.4748	9.8841	10.49	11.185	11.478	12.012	12.476	12.792	13.024	13.368	14.056	14.555	15.066
0.49568	0.9905	1.5368	2.0622	2.6347	3.0053	3.4739	4.0763	4.6765	5.0202	5.6415	6.0927	6.4209	7.2674	7.4499	8.0673	8.4216	9.049	9.5036	10.093	10.552	10.944	11.61	12.131	12.389	12.651	13.096	13.552	14.056	14.228	14.986
0.48353	0.99739	1.5277	2.1062	2.6411	3.0747	3.5421	4.0763	4.6133	4.8883	5.5499	6.1575	6.4992	7.2192	7.5361	7.99	8.4483	8.9239	9.4316	10.214	10.521	11.008	11.544	12.08	12.511	12.899	13.006	13.533	13.962	14.4	15.105
0.4916	1.0078	1.5007	2.134	2.5905	3.0538	3.5269	4.093	4.5863	4.907	5.6313	6.0605	6.4879	7.2915	7.5485	7.9771	8.5555	8.9655	9.3314	10.048	10.521	10.912	11.56	12.097	12.424	12.757	13.024	13.423	13.906	14.419	15.066
0.48957	1.0217	1.5551	2.0841	2.6157	3.026	3.5269	4.1349	4.5149	4.9352	5.6007	5.9433	6.5329	7.0997	7.4868	7.9131	8.542	8.9794	9.5325	10.063	10.505	10.881	11.511	12.165	12.476	12.845	12.952	13.405	14.037	14.574	15.085
0.47954	1.0043	1.5643	2.1062	2.6157	3.0538	3.5193	4.1181	4.5416	4.9352	5.5297	6.0177	6.5441	7.2553	7.4376	7.8494	8.6907	9.0211	9.4604	10.093	10.552	10.976	11.61	12.251	12.459	12.81	13.078	13.332	14.019	14.419	15.205
0.47954	0.99739	1.5187	2.0622	2.6094	3.0747	3.5881	4.1181	4.5863	4.9728	5.5803	6.0498	6.5216	7.2312	7.4376	7.99	8.475	8.7999	9.4748	10.093	10.598	10.992	11.726	12.097	12.337	12.792	13.15	13.405	14	14.633	15.306
0.48755	0.98365	1.5597	2.0951	2.5905	3.1521	3.5117	4.1349	4.5863	4.9258	5.5398	6.0177	6.4879	7.1354	7.5238	8.1062	8.4616	8.7179	9.4316	10.169	10.598	11.056	11.659	11.86	12.32	12.774	13.006	13.368	14.056	14.535	15.205
0.49364	1.0043	1.5277	2.0841	2.6157	3.0399	3.5957	4.1433	4.5684	4.907	5.662	6.0071	6.612	7.1952	7.4745	8.0932	8.342	8.8963	9.4748	10.26	10.521	10.992	11.56	12.097	12.337	12.792	12.935	13.441	14.056	14.419	15.046
0.5102	1.0043	1.5187	2.0951	2.578	3.1027	3.565	4.1433	4.5863	4.9823	5.6415	6.0071	6.6006	7.1473	7.4991	8.0544	8.4616	8.9794	9.4316	10.229	10.428	10.992	11.445	12.148	12.528	12.845	12.917	13.35	14.037	14.342	15.125
0.48755	1.0043	1.5689	2.0513	2.5592	3.0887	3.5727	4.1517	4.5774	5.0487	5.6517	6.0284	6.726	7.1712	7.5238	7.9259	8.475	8.9794	9.4892	10.108	10.413	10.928	11.478	11.961	12.389	12.845	13.006	13.386	14.075	14.535	15.026
0.49568	0.98707	1.5597	2.0841	2.5654	3.1027	3.5957	4.1517	4.5953	4.9917	5.6415	6.0605	6.7375	7.1473	7.4622	7.9003	8.5018	8.9794	9.4748	10.26	10.382	11.072	11.445	11.978	12.406	12.739	12.845	13.719	14.17	14.769	15.165
0.49773	1.0078	1.5323	2.0513	2.5968	3.1027	3.5345	4.0514	4.5953	4.9823	5.4793	6.0284	6.749	7.1952	7.4622	7.9259	8.5152	8.9239	9.5181	10.321	10.397	11.152	11.412	11.911	12.424	12.757	12.899	13.441	14.151	14.535	15.245
0.4916	0.99739	1.4562	2.0458	2.6411	2.9642	3.5881	4.0597	4.5953	4.9352	5.7031	6.0391	6.6233	7.1593	7.4868	7.9003	8.5286	8.9516	9.5036	10.26	10.382	10.976	11.379	12.012	12.337	12.863	12.952	13.405	14.094	14.419	15.487
0.49979	0.99739	1.4873	2.0404	2.5654	3.1949	3.5117	4.1097	4.5595	5.0012	5.4994	6.0712	6.6688	7.2553	7.5485	7.9387	8.5689	8.8549	9.5036	10.063	10.552	11.024	11.56	12.029	12.424	12.899	12.988	13.57	14.075	14.574	15.366
0.49568	1.0182	1.5097	2.0458	2.5717	3.0957	3.5498	4.245	4.5863	4.954	5.4994	5.9964	6.6688	7.1235	7.623	7.7987	8.4616	8.8963	9.5181	10.154	10.833	11.185	11.544	12.012	12.511	12.881	13.006	13.644	13.868	14.574	15.265
0.48353	0.98707	1.4562	2.0404	2.6221	3.026	3.5498	4.1685	4.5149	5.0678	5.4292	5.9858	6.5329	7.2192	7.623	7.7987	8.4616	8.8824	9.5615	10.521	10.428	11.12	11.56	12.029	12.598	12.828	13.006	13.368	13.868	14.477	15.285
0.50186	1.0078	1.5097	2.035	2.5405	3.0191	3.5345	4.1433	4.4972	4.9823	5.4994	6.0712	6.749	7.2915	7.4991	7.824	8.4884	8.8963	9.678	10.063	10.521	11.152	11.726	12.097	12.616	12.739	13.332	13.441	13.868	14.555	15.306
0.50601	0.96666	1.5052	2.0296	2.5968	3.0468	3.5269	4.1265	4.5595	5.0582	5.4392	6.1035	6.6574	7.3522	7.5733	7.8367	8.435	8.8963	9.6051	9.9734	10.521	11.12	11.726	11.86	12.881	12.721	12.863	13.478	13.681	14.458	15.386
0.48153	1.0253	1.5142	2.0786	2.553	3.0607	3.5804	4.1181	4.5416	4.907	5.4192	6.0498	6.7146	7.2312	7.5114	7.7861	8.5824	9.0072	9.547	10.214	10.49	11.088	11.709	12.08	12.651	12.704	12.952	13.478	13.887	14.535	15.125
0.47755	0.9905	1.5323	2.1006	2.5592	3.0053	3.5269	4.1685	4.5774	4.8697	5.4592	6.0177	6.578	7.2433	7.5238	7.8748	8.475	9.0072	9.7366	10.336	10.382	11.008	11.577	12.148	12.528	12.739	13.168	13.35	14.019	14.672	15.066
0.48755	1.0113	1.5187	2.0567	2.578	3.0747	3.5345	4.2024	4.5595	5.0107	5.4793	5.9858	6.6233	7.2192	7.4254	7.8367	8.3818	8.9377	9.3742	10.018	10.567	11.12	11.709	12.165	12.528	12.81	13.774	13.423	14.019	14.672	15.225
0.49568	0.98365	1.5643	2.1062	2.6411	3.0468	3.5041	4.1855	4.5416	5.0392	5.4994	6.0391	6.5667	7.2192	7.4132	7.9387	8.5286	8.9516	9.6926	10.093	10.676	11.12	11.659	12.114	12.651	12.899	13.186	13.441	13.924	14.633	15.145
0.48957	1.0147	1.5551	2.0404	2.6666	3.0607	3.5117	4.177	4.6675	4.954	5.4592	6.0391	6.6006	7.2433	7.3522	7.9771	8.4884	8.9101	9.5325	10.199	10.459	10.992	11.577	12.131	12.459	12.792	13.186	13.405	14	14.672	15.285
0.49773	0.98365	1.5643	2.0677	2.6157	3.026	3.5041	4.1939	4.5774	5.0012	5.5195	5.9433	6.6574	7.2192	7.4132	8.0673	8.3024	8.9101	9.5181	10.154	10.428	11.04	11.593	12.097	12.459	12.935	13.241	13.313	13.981	14.868	15.528
0.48957	0.9905	1.5781	2.0026	2.6221	3.1097	3.4739	4.2024	4.6223	5.0012	5.6109	5.9011	6.6006	7.1952	7.4132	7.8748	8.542	9.0072	9.5905	10.048	10.351	10.992	11.577	12.046	12.493	13.06	13.006	13.024	14.019	14.75	15.306
0.49364	1.0113	1.5323	2.0296	2.6094	3.0677	3.4966	4.177	4.5061	5.0012	5.6007	5.9328	6.6233	7.1354	7.4132	8.0028	8.5286	8.9933	9.446	10.078	10.428	11.152	11.511	12.131	12.546	13.06	13.241	13.078	14.113	14.691	15.285
0.48153	0.98365	1.5097	2.0786	2.4911	3.026	3.4664	4.1855	4.6675	4.9258	5.5803	5.9116	6.578	7.1593	7.5609	8.0673	8.4083	9.077	9.5615	10.078	10.552	11.072	11.577	12.029	12.459	12.899	13.295	13.132	14.075	14.613	15.165
0.48554	0.97683	1.5735	2.0677	2.578	3.0817	3.6189	4.1939	4.5595	4.954	5.5398	5.8696	6.578	7.1235	7.5609	7.9771	8.5959	9.0351	9.5325	10.078	10.505	11.056	11.577	12.114	12.669	12.774	13.114	13.386	13.962	14.497	15.145
0.48957	0.98707	1.5781	2.0622	2.4973	3.0817	3.5117	4.1939	4.5953	4.954	5.5905	5.9011	6.6688	7.3279	7.4991	8.0286	8.5555	9.105	9.5615	10.123	10.521	10.992	11.577	12.165	12.651	12.739	13.241	13.295	13.962	14.497	15.026
0.49568	1.0358	1.5597	2.0404	2.5281	3.0887	3.4739	4.2109	4.6494	4.8977	5.5905	5.88	6.6006	7.2433	7.5361	8.0415	8.5152	9.077	9.5905	10.26	10.505	11.024	11.61	12.131	12.476	12.581	13.186	13.386	13.793	14.477	15.205
0.4916	0.93988	1.5551	2.0786	2.553	3.0607	3.4664	4.1265	4.5416	4.9445	5.4893	5.7548	6.6917	7.2795	7.5733	8.0415	8.65	9.0211	9.5325	10.123	10.521	10.96	11.659	12.165	12.493	12.704	13.186	13.496	13.849	14.555	15.006
0.49364	1.0465	1.5414	1.9866	2.553	3.1027	3.5804	4.2194	4.5774	4.9445	5.56	5.9539	6.7835	7.2433	7.3279	8.0415	8.542	9.091	9.5615	10.184	10.598	10.976	11.793	12.182	12.406	12.686	13.168	13.423	13.831	14.769	15.245
0.47558	0.97343	1.5597	2.0622	2.5592	3.0957	3.5269	4.1601	4.5684	4.907	5.5702	5.9328	6.6233	7.2312	7.5733	8.0157	8.4884	9.077	9.6051	10.138	10.505	10.912	11.843	12.114	12.459	12.669	13.132	13.478	13.849	14.497	15.205
0.48353	1.0043	1.5459	2.0513	2.553	3.0468	3.5421	4.2279	4.6043	4.907	5.4893	5.9858	6.612	7.2553	7.4132	8.0157	8.6364	9.0072	9.547	10.123	10.552	10.944	11.843	12.165	12.581	12.598	13.024	13.478	13.887	14.75	15.205
0.49979	0.99739	1.5505	2.0841	2.5717	3.0677	3.5421	4.2792	4.5684	4.9445	5.56	5.9964	6.612	7.2674	7.4868	8.0544	8.5555	8.9377	9.6051	10.108	10.413	10.928	11.759	12.063	12.563	12.563	12.917	13.515	13.943	14.574	15.105
0.48554	0.94652	1.5459	2.0731	2.5717	3.0677	3.5041	4.3223	4.5863	4.9728	5.5499	6.0391	6.4544	7.1832	7.4376	8.1062	8.5152	9.0211	9.5615	10.123	10.598	11.056	11.776	12.08	12.511	12.598	12.845	13.496	13.962	14.633	15.265
0.48755	0.97004	1.5505	2.0786	2.5592	3.0538	3.5117	4.1601	4.5149	4.8697	5.5398	6.0071	6.5554	7.2072	7.3887	7.9259	8.5286	8.9377	9.547	10.018	10.443	11.04	11.659	12.131	12.285	12.686	13.006	13.496	14.094	14.574	14.927
0.50393	0.9905	1.5459	2.1117	2.5219	3.0399	3.5193	4.093	4.5863	4.9164	5.5297	6.0177	6.6233	7.1832	7.4745	8.1322	8.475	8.9933	9.2887	10.123	10.459	10.976	11.56	12.012	12.406	12.792	13.024	13.313	14.019	14.594	15.085
0.49773	1.0043	1.5597	2.0622	2.5654	3.0747	3.5269	4.177	4.6133	4.9445	5.3894	5.9539	6.5667	7.2072	7.4991	7.8114	8.4616	9.1331	9.547	10.138	10.629	11.104	11.511	12.097	12.355	12.828	13.024	13.313	14.075	14.613	15.145
0.48957	0.97343	1.5368	2.0731	2.5343	3.0538	3.565	4.1685	4.6403	5.0012	5.6007	5.9858	6.4992	7.1952	7.5114	7.99	8.4216	9.049	9.6051	10.229	10.244	11.217	11.56	11.978	12.355	12.792	12.97	13.441	14.189	14.887	15.125
0.51441	0.99739	1.5368	2.0731	2.5717	3.0468	3.5269	4.1013	4.6313	5.0012	5.4492	6.0177	6.6006	7.1473	7.5361	7.9515	8.4616	8.9655	9.6196	10.336	10.521	11.024	11.643	11.995	12.389	12.917	12.988	13.423	14.075	14.497	15.185
0.48353	0.97683	1.5007	2.1006	2.5592	3.0817	3.489	4.0763	4.4972	5.1061	5.56	6.0177	6.646	7.2433	7.5114	7.8876	8.5689	9.2177	9.4892	10.184	10.598	10.992	11.56	12.08	12.389	12.881	13.024	13.478	14.037	14.633	14.966
0.48957	0.98707	1.5232	2.0567	2.5842	3.0887	3.4589	4.1939	4.5595	4.9823	5.6109	6.0605	6.5667	7.1832	7.4868	7.9515	8.6094	8.9933	9.547	10.305	10.336	10.992	11.61	11.978	12.389	12.845	12.899	13.46	14.285	14.828	15.225
0.48755	0.98024	1.5007	2.0786	2.6031	3.0053	3.5117	4.1013	4.5505	5.0012	5.5905	5.9433	6.5554	6.8646	7.5114	8.0157	8.7316	8.9377	9.6342	10.169	10.739	10.992	11.544	11.961	12.581	12.757	13.042	13.57	13.868	14.711	15.165
0.46195	0.98707	1.5097	2.0567	2.6094	3.0053	3.5193	4.1855	4.5238	5.0487	5.5095	5.9433	6.5893	7.0997	7.4745	7.99	8.5959	9.091	9.5905	10.199	10.567	11.04	11.544	11.843	12.511	12.651	12.988	13.46	13.981	14.947	15.105
0.48957	0.94652	1.5551	2.0896	2.6094	2.9573	3.5345	4.1181	4.5238	5.1061	5.4793	6.0927	6.6688	7.2553	7.5238	7.9771	8.5689	9.0072	9.576	10.184	10.428	10.96	11.379	12.063	12.372	12.792	12.988	13.386	14.208	14.323	14.887
0.52508	0.98365	1.5368	2.0951	2.5842	3.0122	3.5421	4.2279	4.5774	5.0107	5.5297	5.9645	6.4879	7.1354	7.5361	8.0286	8.5959	9.2887	9.7219	10.229	10.459	10.944	11.445	12.131	12.389	12.721	13.042	13.295	14.094	14.633	15.265
0.49568	1.0043	1.5551	2.0786	2.5968	3.0053	3.5269	4.2024	4.5953	5.0202	5.4292	5.9433	6.5441	7.2433	7.4868	8.1322	8.475	8.9516	9.6488	10.214	10.443	10.897	11.56	12.131	12.493	12.651	13.06	13.405	14.247	14.477	15.165
0.47954	0.97343	1.5689	2.0677	2.6031	3.0399	3.5117	4.1855	4.5416	5.0487	5.4893	6.0071	6.6802	7.1832	7.4622	8.0028	8.542	8.9516	9.678	10.199	10.459	10.881	11.494	12.114	12.528	12.651	12.97	13.368	14.075	14.652	15.066
0.49364	1.0113	1.5277	2.1006	2.5842	3.0468	3.4966	4.1685	4.5684	5.0392	5.5095	6.0284	6.5554	7.2312	7.5114	7.99	8.4884	9.077	9.6634	10.123	10.505	10.817	11.461	12.114	12.598	12.774	12.845	13.719	14.151	14.73	15.125
0.48554	0.98707	1.5505	2.0731	2.578	3.0468	3.5193	4.1601	4.5505	4.954	5.4592	5.9645	6.5329	7.2312	7.4745	8.0157	8.4216	9.091	9.7366	9.899	10.505	11.136	11.527	12.097	12.633	12.881	12.863	13.332	14.151	14.652	15.205
0.49979	0.95656	1.5277	2.0731	2.6094	3.0399	3.4364	4.1517	4.5505	4.9728	5.3993	5.9858	6.646	7.1952	7.4376	8.1322	8.395	8.9516	9.6051	10.154	10.443	11.04	11.494	12.2	12.651	12.81	13.114	13.607	13.943	14.574	15.245
0.47361	0.97343	1.5232	2.0951	2.485	3.0817	3.5421	4.1265	4.5595	5.0297	5.3794	6.0498	6.5104	7.1832	7.4622	8.0157	8.4483	9.105	9.6488	10.138	10.505	11.072	11.626	12.268	12.563	12.845	13.114	13.607	14.037	14.477	15.006
0.4916	0.99739	1.4962	2.0567	2.578	3.0887	3.5345	4.1433	4.5774	5.0773	5.3201	5.9751	6.5104	7.4622	7.5857	7.9643	8.4216	9.049	9.5905	10.048	10.505	11.008	11.56	11.894	12.546	12.81	13.222	13.46	14.304	14.497	15.125
0.50393	0.9905	1.5097	2.0242	2.5968	3.0538	3.489	4.068	4.5774	5.0012	5.4192	6.0071	6.646	7.2192	7.3522	8.0157	8.5152	9.077	9.4604	10.093	10.536	11.152	11.544	12.148	12.651	12.757	13.186	13.423	14.094	14.613	15.165
0.49364	1.0253	1.5874	2.1507	2.5034	3.0747	3.5345	4.0266	4.6223	5.0487	5.4292	6.0177	6.5216	7.2312	7.3887	8.0286	8.5152	9.105	9.5615	10.154	10.382	11.008	11.544	12.182	12.704	12.739	13.222	13.478	13.774	14.497	15.046
0.49364	0.95656	1.5689	1.9973	2.6157	3.033	3.5193	4.1433	4.6133	4.9917	5.4692	6.1035	6.612	7.2192	7.4745	7.99	8.4483	9.0351	9.5036	10.184	10.552	10.96	11.494	11.776	12.669	12.739	13.114	13.57	14.037	14.381	15.105
0.49364	1.0217	1.5277	2.0786	2.6157	3.1097	3.5269	4.1013	4.6494	4.9728	5.4392	6.0071	6.5893	7.2312	7.1952	8.0157	8.4483	8.9239	9.5905	10.033	10.629	11.04	11.428	12.012	12.511	12.828	13.295	13.812	14	14.228	15.125
0.50601	0.95991	1.5735	2.1117	2.6347	3.138	3.5269	4.1265	4.713	4.879	5.4893	5.9645	6.612	7.2312	7.4254	7.9771	8.3552	8.9655	9.5615	10.138	10.397	10.944	11.428	12.063	12.669	12.828	13.222	13.423	14.113	14.439	15.085
0.48957	0.97004	1.5323	2.1117	2.7441	3.0607	3.5193	4.177	4.6223	4.9164	5.5095	5.9116	6.5104	7.1712	7.3765	8.0157	8.4616	9.0211	9.576	10.26	10.505	11.024	11.659	12.217	12.651	12.81	13.241	13.277	14.381	14.4	15.125
0.49773	0.9905	1.5142	2.0677	2.6221	3.026	3.4438	4.1181	4.6223	4.8883	5.5297	5.9222	6.5667	7.0759	7.4376	8.0415	8.4216	8.9933	9.547	10.018	10.459	11.072	11.743	12.217	12.546	12.721	13.114	13.552	14.075	14.535	15.026
0.50601	0.9905	1.5232	2.1173	2.5842	3.0887	3.5269	4.1265	4.5684	4.9823	5.5095	5.9116	6.6347	7.1712	7.4499	7.9643	8.5286	9.063	9.6488	10.305	10.505	11.056	11.759	12.097	12.581	12.739	13.096	13.533	14.075	14.535	15.225
0.49979	0.9905	1.5368	2.1228	2.5968	3.0399	3.4966	4.1097	4.5505	4.9823	5.4793	5.9222	6.6006	7.2312	7.5238	8.0028	8.475	9.1191	9.5325	10.244	10.428	11.024	11.511	12.063	12.493	12.546	13.114	13.533	14.056	14.555	14.887
0.51865	0.97683	1.5277	2.0677	2.5654	3.033	3.5193	4.093	4.6584	4.9917	5.5398	5.9011	6.4992	7.2192	7.5981	7.6729	8.65	8.8687	9.5905	10.275	10.397	10.992	11.793	11.877	12.616	12.81	13.204	13.515	14.019	14.75	15.185
0.50601	0.97343	1.5828	2.0731	2.5842	3.0607	3.4966	4.093	4.5595	5.0487	5.4994	6.0284	6.5441	7.2795	7.5485	7.9003	8.6364	9.063	9.576	10.305	10.474	10.976	11.709	11.995	12.563	12.476	13.277	13.478	14	14.789	15.265
0.48353	1.0078	1.5277	2.0567	2.5717	3.0607	3.5041	4.1097	4.5595	4.9917	5.4994	5.8591	6.5667	7.2915	7.5733	7.8876	8.5824	9.0211	9.6634	10.214	10.521	11.072	11.56	12.114	12.389	12.935	13.168	13.405	14.094	14.789	15.528
0.49773	0.9905	1.5689	2.0188	2.4667	3.0677	3.5574	4.1601	4.5416	5.0202	5.5398	5.9858	6.6006	7.1952	7.4991	7.9387	8.435	9.063	9.7807	10.244	10.505	11.008	11.776	11.927	12.476	12.598	13.259	13.478	14.019	14.769	15.165
0.49364	0.99394	1.5142	2.0731	2.5842	3.0538	3.5727	4.1013	4.5774	5.0582	5.6109	5.9433	6.5667	7.2915	7.5114	7.9643	8.3685	9.1472	9.7219	10.26	10.583	10.96	11.659	12.165	12.459	12.863	13.096	13.496	13.943	14.535	15.366
0.48153	0.97343	1.5007	2.0513	2.6031	3.0817	3.4966	4.1517	4.6675	4.954	5.5905	5.9328	6.612	7.2192	7.5238	8.0286	8.3818	9.0072	9.7513	10.244	10.598	11.152	11.527	12.046	12.424	12.721	13.222	13.241	13.943	14.439	15.346
0.47954	1.0217	1.5368	2.0731	2.5842	3.0468	3.4664	4.1181	4.6223	4.9352	5.5905	5.9539	6.612	7.3037	7.4868	7.9643	8.395	9.0072	9.8102	10.26	10.536	11.056	11.577	11.826	12.563	12.704	13.096	13.423	13.962	14.419	15.245
0.48755	1.0217	1.5505	2.0513	2.5842	3.0468	3.4589	4.0597	4.6313	4.954	5.56	5.9222	6.612	7.1952	7.5485	8.0028	8.4216	9.049	9.7954	10.305	10.428	11.024	11.593	11.978	12.493	12.792	13.168	13.441	13.924	14.633	15.265
0.48957	1.0323	1.5368	2.0567	2.6538	3.033	3.4966	4.177	4.6043	4.9634	5.6007	5.9328	6.646	7.1952	7.4376	7.9643	8.342	9.077	9.8397	10.397	10.49	10.96	11.544	12.046	12.459	12.757	13.096	13.423	13.943	14.73	15.085
0.49364	1.0078	1.5781	2.0458	2.5343	3.0747	3.6189	4.1601	4.6133	5.0392	5.56	6.0284	6.6006	7.2553	7.3279	7.8621	8.3288	9.1331	9.9287	10.305	10.49	10.944	11.577	11.995	12.424	12.739	13.096	13.405	14	14.769	15.265
0.48554	1.0429	1.5689	2.0786	2.6284	3.0887	3.6112	4.1349	4.6133	5.0107	5.5297	5.9858	6.6233	7.1952	7.4376	7.99	8.4083	9.1472	9.8545	10.275	10.49	10.96	11.61	12.114	12.441	12.774	13.096	13.441	14.094	14.691	15.085
0.4916	1.0182	1.5414	2.0951	2.6347	2.9985	3.5269	4.1265	4.6675	5.0012	5.6109	5.9964	6.646	7.2433	7.4745	8.0157	8.4616	9.105	9.7073	10.169	10.598	11.088	11.544	12.08	12.546	12.757	13.096	13.515	14.019	14.75	15.165
0.49773	1.0008	1.5368	2.0896	2.6221	3.026	3.5421	4.1433	4.7312	4.9917	5.5499	6.0071	6.5216	7.3037	7.5114	8.0415	8.5689	9.0072	9.6342	10.138	10.474	11.04	11.428	11.894	12.372	12.828	12.97	13.607	14.056	14.789	15.225
0.49773	1.0182	1.5921	2.0896	2.5219	3.0817	3.4065	4.1601	4.6403	5.0773	5.6313	5.9858	6.4767	7.1712	7.5361	8.0544	8.4483	9.091	9.4892	10.078	10.567	11.104	11.396	12.029	12.32	12.845	13.132	13.405	14.17	14.555	15.285
0.48353	1.0147	1.5097	2.0622	2.5717	2.9916	3.5117	4.2194	4.5863	5.0678	5.6313	5.9858	6.5667	7.1593	7.4622	7.99	8.435	9.0351	9.5615	10.154	10.614	11.152	11.593	11.894	12.441	12.952	13.186	13.405	14	14.535	15.406
0.46969	0.99739	1.4873	2.0731	2.5905	3.0677	3.5804	4.1097	4.5595	4.9917	5.5702	6.0177	6.4879	7.0523	7.4991	7.9131	8.475	8.9655	9.5325	10.018	10.459	11.12	11.544	11.978	12.651	12.721	13.15	13.441	14.094	14.574	15.285
0.47165	1.0078	1.5187	2.1062	2.5842	3.026	3.5498	4.2194	4.5953	4.9728	5.5905	5.9751	6.5441	7.0641	7.5114	7.8748	8.4616	8.9933	9.5615	10.033	10.536	11.168	11.379	12.097	12.563	12.774	12.988	13.423	14.151	14.594	15.105
0.48554	1.0147	1.4962	2.0896	2.6094	3.0538	3.5498	4.1855	4.5595	4.9823	5.5398	5.9539	6.4544	7.1473	7.5114	7.9259	8.5689	9.063	9.5181	10.093	10.521	11.136	11.461	12.131	12.598	12.476	12.97	13.368	13.981	14.711	15.265
0.47755	1.0043	1.5597	2.1006	2.553	3.1238	3.5193	4.2535	4.5863	4.8977	5.5702	5.9116	6.4098	6.9815	7.5238	7.9259	8.4884	9.0072	9.5036	10.078	10.552	10.992	11.61	12.217	12.546	12.757	13.024	13.496	13.812	14.75	15.046
0.47558	0.98365	1.4784	2.0841	2.6602	3.0538	3.5574	4.2024	4.5595	4.9352	5.6517	6.0391	6.5441	7.2072	7.5238	7.9387	8.6094	9.0211	9.3742	10.123	10.536	11.104	11.593	12.131	12.511	12.792	13.042	13.423	13.626	14.535	15.145
0.47361	0.98024	1.4828	2.1284	2.6411	3.0607	3.5804	4.1939	4.5238	4.954	5.5499	6.1575	6.4432	7.0404	7.4376	7.9003	8.5286	9.0211	9.5036	10.199	10.474	11.056	11.81	12.097	12.633	12.704	13.132	13.423	13.981	14.828	15.165
0.48554	1.0078	1.4962	2.1006	2.673	3.033	3.5574	4.2364	4.5327	4.9164	5.5803	5.9858	6.5216	7.0286	7.4254	7.8876	8.4616	8.9655	9.4748	10.184	10.521	10.992	11.494	12.097	12.598	12.792	13.024	13.607	14.208	14.711	15.185
0.48153	1.0078	1.5007	2.1395	2.578	3.0053	3.5498	4.1601	4.5505	4.954	5.5499	5.9751	6.5329	7.0168	7.4132	7.9131	8.542	8.8963	9.446	10.428	10.629	11.088	11.61	12.131	12.616	12.686	12.863	13.423	14	14.789	15.145
0.47755	0.97683	1.5232	2.0896	2.5717	3.0191	3.5041	4.1601	4.5863	4.9728	5.5398	5.9751	6.4992	7.0523	7.4132	7.9643	8.5689	9.1472	9.6196	10.536	10.536	11.056	11.643	12.114	12.546	12.669	13.006	13.46	14.113	14.828	15.386
0.4916	0.96666	1.4784	2.0622	2.6923	3.0122	3.5193	4.1685	4.5416	4.9258	5.5095	5.9964	6.5329	7.1832	7.5361	8.0415	8.5824	8.9933	9.4892	10.428	10.428	11.008	11.577	12.182	12.563	12.704	13.132	13.57	14	14.75	15.406
0.48755	0.94986	1.5232	2.0677	2.5592	2.9985	3.565	4.1517	4.5595	4.9445	5.4994	6.0071	6.6574	7.1832	7.4132	8.1062	8.5286	8.9377	9.6926	10.397	10.49	10.992	11.643	11.944	12.511	12.721	13.096	13.515	14.132	14.73	15.447
0.4916	0.98024	1.5052	2.0296	2.5968	3.0538	3.5804	4.1601	4.4707	4.9728	5.4994	6.0605	6.646	7.1473	7.3522	8.1192	8.542	9.0072	9.766	10.428	10.536	11.152	11.81	12.165	12.406	12.739	13.222	13.552	14.113	14.672	15.185
0.5102	0.99739	1.5459	2.008	2.6157	3.0468	3.5881	4.1349	4.4795	5.0392	5.4292	6.082	6.646	7.1593	7.3279	8.0544	8.5959	8.9655	9.7954	10.413	10.536	11.072	11.544	11.927	12.476	12.881	12.952	13.478	13.906	14.613	15.326
0.52079	0.97343	1.5368	2.0188	2.5842	3.0468	3.6035	4.1517	4.5505	4.907	5.5702	6.1142	6.5329	7.1952	7.3644	8.0544	8.4884	9.077	9.8249	10.321	10.583	11.056	11.527	12.046	12.493	12.863	13.204	13.533	13.887	14.613	15.185
0.5123	0.9905	1.5368	2.0296	2.5717	3.0399	3.6421	4.1265	4.5505	4.907	5.4793	6.082	6.578	7.1952	7.4622	8.1062	8.7316	8.8549	9.7073	10.321	10.536	11.072	11.626	12.063	12.389	12.757	13.295	13.607	13.943	14.555	15.185
[truncated: 98,162 more rows]
